# Supplementary material for: Deep-transcriptome and ribonome sequencing redefines the molecular networks of pluripotency and the extracellular space in human embryonic stem cells
Source: HighWire-hosted journal article supplement (doi:10.1101/gr.119321.110), 2011-10-31
Supplement: Supp_Tables.xlsx [file Supp_Tables.xlsx]

## Sheet: TableS1
Supplementary Table S1: Genes above 5RPKM not previously identified as expressed in microarray or MPSS studies
GENE SYMBOL	ENSEMBL GENE ID	ENSEMBL v55 CANONICAL TRANSCTIPT ID	RPKM (mRNA)	PLURINET GENE	H3K4	H3K36	H3K27
ANAPC2	ENSG00000176248	ENST00000323927	8.20057	No	Y	Y	N
ANP32C	ENSG00000184701	ENST00000330241	9.255	No	N	N	N
APBA2	ENSG00000034053	ENST00000219865	5.93506	No	Y	Y	LOW
APOL2	ENSG00000128335	ENST00000451256	6.08496	No	Y	Y	N
ARHGDIG	ENSG00000242173	ENST00000399932	24.6743	No	Y	N	N
ARNT	ENSG00000143437	ENST00000358595	14.4702	No	Y	Y	N
ASB7	ENSG00000183475	ENST00000332783	5.38786	No	Y	Y	N
ATXN2L	ENSG00000168488	ENST00000395547	50.8103	No	Y	Y	N
B3GALT1	ENSG00000172318	ENST00000305861	5.26256	No	Y	Y	N
B3GAT3	ENSG00000149541	ENST00000265471	9.5329	No	Y	Y	N
BCAP29	ENSG00000075790	ENST00000379117	5.4825	No	Y	Y	N
BCL7A	ENSG00000110987	ENST00000261822	9.02098	No	Y	Y	N
BIK	ENSG00000100290	ENST00000216115	6.23342	Plurinet	Y	N	LOW
BRAP	ENSG00000089234	ENST00000327551	9.47668	No	Y	Y	N
C20orf112	ENSG00000197183	ENST00000359676	8.92757	No	Y	Y	N
C6orf64	ENSG00000112167	ENST00000229903	5.40077	No	Y	Y	N
CAPN10	ENSG00000142330	ENST00000391984	6.58351	No	Y	Y	N
CAPN6	ENSG00000077274	ENST00000324068	7.1805	No	LOW	LOW	Y
CDH6	ENSG00000113361	ENST00000265071	7.43376	No	Y	Y	Y
CDK3	ENSG00000250506	ENST00000293215	8.24268	No	N	Y	N
CDK5R1	ENSG00000176749	ENST00000313401	5.01021	No	Y	Y	N
CDKAL1	ENSG00000145996	ENST00000274695	7.88234	No	Y	Y	Y
CHAF1B	ENSG00000159259	ENST00000314103	13.9075	No	Y	Y	N
CHM	ENSG00000188419	ENST00000357749	5.05901	No	Y	Y	Y
CLTCL1	ENSG00000070371	ENST00000263200	5.11663	No	Y	Y	N
CNTF	ENSG00000242689	ENST00000316059	13.7367	No	Y	Y	N
CPZ	ENSG00000109625	ENST00000360986	12.0172	No	Y	Y	N
CWF19L1	ENSG00000095485	ENST00000354105	12.7266	No	Y	Y	N
DCLRE1A	ENSG00000198924	ENST00000361384	9.98109	No	Y	Y	N
DDX51	ENSG00000185163	ENST00000397333	5.46575	No	Y	Y	N
DLG4	ENSG00000132535	ENST00000293813	9.61481	No	Y	Y	N
DLX5	ENSG00000105880	ENST00000222598	8.16935	No	Y	N	Y
DPEP1	ENSG00000015413	ENST00000421184	5.08401	No	LOW	LOW	LOW
DPP4	ENSG00000197635	ENST00000360534	6.37015	No	Y	Y	Y
EFNA3	ENSG00000143590	ENST00000368408	8.64263	No	Y	N	Y
EFNA5	ENSG00000184349	ENST00000333274	12.6772	No	Y	Y	Y
EPHA4	ENSG00000116106	ENST00000281821	6.16821	No	Y	Y	LOW
EPHX2	ENSG00000120915	ENST00000458037	6.62904	No	Y	Y	LOW
FCHSD2	ENSG00000137478	ENST00000409314	5.85751	No	Y	LOW	LOW
FGA	ENSG00000171560	ENST00000302053	5.81567	No	N	N	N
FGFR1OP	ENSG00000213066	ENST00000366847	13.3196	No	Y	Y	N
FHOD3	ENSG00000134775	ENST00000257209	5.68043	No	Y	Y	Y
FKRP	ENSG00000181027	ENST00000391909	5.58505	No	Y	Y	LOW
FNDC4	ENSG00000115226	ENST00000264703	8.40031	No	Y	Y	N
GAB1	ENSG00000109458	ENST00000262995	5.61026	No	Y	Y	LOW
GALK1	ENSG00000108479	ENST00000437911	5.42256	No	Y	Y	N
GATA3	ENSG00000107485	ENST00000379328	5.49398	No	Y	LOW	Y
GCNT2	ENSG00000111846	ENST00000379597	11.3835	No	Y	Y	N
GDPD2	ENSG00000130055	ENST00000453994	10.8707	No	Y	Y	N
GEMIN7	ENSG00000142252	ENST00000414125	14.311	Plurinet	Y	Y	N
GMEB1	ENSG00000162419	ENST00000294409	8.88964	No	Y	Y	N
GPR143	ENSG00000101850	ENST00000380929	8.2334	No	Y	Y	Y
HIST1H2BM	ENSG00000196374	ENST00000359465	5.14894	No	Y	N	N
HTR1D	ENSG00000179546	ENST00000314113	18.5077	No	N	N	N
IGF2	ENSG00000167244	ENST00000337883	58.0781	No	Y	N	N
IGFBP3	ENSG00000146674	ENST00000381083	9.74612	No	Y	Y	Y
INCENP	ENSG00000149503	ENST00000394818	9.62588	No	Y	Y	N
INS	ENSG00000129965	ENST00000356578	27.1431	No	N	N	N
KCNK12	ENSG00000184261	ENST00000327876	6.95037	No	Y	LOW	Y
KCTD13	ENSG00000174943	ENST00000308768	5.74969	No	Y	Y	N
KCTD17	ENSG00000100379	ENST00000403888	8.48776	No	Y	Y	N
KIAA0753	ENSG00000198920	ENST00000361413	5.72316	No	Y	Y	N
KIF13A	ENSG00000137177	ENST00000259711	5.8056	No	Y	Y	N
LAD1	ENSG00000159166	ENST00000367313	8.20555	No	Y	Y	N
LEPREL2	ENSG00000110811	ENST00000290510	9.43119	No	Y	Y	N
LHX5	ENSG00000089116	ENST00000261731	9.31771	No	Y	LOW	Y
LLGL1	ENSG00000131899	ENST00000316843	15.6306	No	Y	Y	N
MAFK	ENSG00000198517	ENST00000343242	5.22753	No	Y	LOW	N
MED18	ENSG00000130772	ENST00000437227	5.63528	No	Y	Y	N
MGAT5	ENSG00000152127	ENST00000409645	8.35935	No	N	Y	LOW
MLLT1	ENSG00000130382	ENST00000252674	11.887	No	Y	Y	N
MMP24	ENSG00000125966	ENST00000246186	9.30059	No	Y	Y	N
MTERF	ENSG00000127989	ENST00000351870	10.2245	No	Y	Y	N
MYB	ENSG00000118513	ENST00000341911	5.75099	Plurinet	Y	Y	Y
NAGLU	ENSG00000108784	ENST00000225927	5.53137	No	Y	Y	N
NCOA1	ENSG00000084676	ENST00000406961	9.31874	No	Y	LOW	N
NFKBIB	ENSG00000104825	ENST00000313582	9.36704	Plurinet	Y	Y	N
NFKBIL2	ENSG00000160949	ENST00000409379	14.0712	No	Y	Y	N
NPAS1	ENSG00000130751	ENST00000253050	5.48349	No	Y	LOW	Y
NR4A1	ENSG00000123358	ENST00000360284	6.61884	No	Y	Y	LOW
PCYT1B	ENSG00000102230	ENST00000379144	5.31631	Plurinet	Y	Y	Y
PDE8A	ENSG00000073417	ENST00000310298	5.08707	No	Y	Y	LOW
PDK2	ENSG00000005882	ENST00000007708	5.97237	No	Y	Y	N
PFKFB4	ENSG00000114268	ENST00000232375	10.3398	No	Y	Y	N
PLAUR	ENSG00000011422	ENST00000340093	5.81619	No	Y	Y	N
POFUT1	ENSG00000101346	ENST00000375749	8.92213	No	Y	Y	N
PRKACA	ENSG00000072062	ENST00000308677	23.1883	No	Y	Y	N
PRKCD	ENSG00000163932	ENST00000394729	11.5935	No	Y	Y	N
PRKCG	ENSG00000126583	ENST00000263431	5.42707	No	Y	LOW	LOW
PRKCZ	ENSG00000067606	ENST00000378567	10.6723	No	Y	Y	N
QPCTL	ENSG00000011478	ENST00000012049	11.354	No	Y	Y	N
RAB3D	ENSG00000105514	ENST00000222120	6.86823	No	Y	Y	N
RAD52	ENSG00000002016	ENST00000358495	6.49113	No	Y	Y	N
RAMP2	ENSG00000131477	ENST00000456272	12.8538	No	N	N	N
RASA3	ENSG00000185989	ENST00000389544	5.12824	No	Y	Y	N
SCAMP4	ENSG00000227500	ENST00000414057	12.2413	No	Y	Y	N
SEMA4A	ENSG00000196189	ENST00000355014	6.80919	No	Y	Y	N
SIX3	ENSG00000138083	ENST00000260653	34.0455	No	Y	N	Y
SLC30A5	ENSG00000145740	ENST00000396591	11.0696	No	Y	Y	N
SNTB1	ENSG00000172164	ENST00000395601	7.40434	No	Y	Y	LOW
STAT2	ENSG00000170581	ENST00000314128	10.0332	No	Y	Y	N
TADA2L	ENSG00000108264	ENST00000394395	7.28014	No	Y	Y	N
TAF4	ENSG00000130699	ENST00000252996	11.3881	No	Y	Y	N
TEF	ENSG00000167074	ENST00000417325	8.05558	No	Y	Y	N
THBS1	ENSG00000137801	ENST00000260356	5.49347	No	Y	Y	N
TRIM38	ENSG00000112343	ENST00000349458	6.30638	No	Y	Y	N
TUSC4	ENSG00000114388	ENST00000232501	9.18166	No	Y	N	N
WWTR1	ENSG00000018408	ENST00000392897	6.37166	No	Y	Y	N
XRCC4	ENSG00000152422	ENST00000338635	9.42352	No	Y	LOW	LOW
ZKSCAN1	ENSG00000106261	ENST00000324306	9.02324	No	Y	Y	N
ZNF154	ENSG00000179909	ENST00000426889	6.92919	No	Y	Y	N
ZNF174	ENSG00000103343	ENST00000268655	5.42569	No	Y	Y	N
ZNF224	ENSG00000186019	ENST00000336976	6.43419	No	Y	Y	N
ZNF549	ENSG00000121406	ENST00000376233	5.29206	No	Y	Y	N
ZNF613	ENSG00000176024	ENST00000293471	9.68154	No	Y	Y	N

## Sheet: Table S2A
Supplementary Table S2A. Splice variants found in human Embryonic Stem Cells that differ to the canonical Ensembl transcript.
This table also details the type of variant and whether the splice event affects a protein domain found in the canonical transcript.
Variant types: AFE: Alternative First Exon; ALE: Alternative Last exon; A5SS: Alternative 5' splice site usage; A3SS: Alternative 3' splice site usage; MXE: Mutually exclusive exon usage; SE: Skipped exon; Other: Other splice types, i.e. complex splicing events
Event #	Variant Type	Ensembl Gene ID	Gene symbol	Coding/non-coding/splice to last (splice to a last exon)	Variant Count	Paired end evidence (# of pairs)	Coordinate 1 (<chr>,<strand>,<left_junction>,<right_junction>)	Protein domain affected by splice event (none = no domain identified; NA = not considered in protein analysis)	InterProID of protein domain affected by splice event	Transcript1 (Canonical)	Transcript2 (Representative variant transcript)	Variant Count (Brain)	Paired end evidence (Brain, # events)	Variant Count (Heart)	Paired end evidence (Heart, # events)	Variant Count (Liver)	Paired end evidence (Liver, # events)
115440	SE	ENSG00000178773	CPNE7	coding	16	0	chr16,+,89644128,89650104	C2_Ca-dep	IPR000008	ENST00000268720	ENST00000319518	0	0	0	0	0	0
110988	A3SS	ENSG00000139641	FAM62A	coding	142	4	chr12,+,56527656,56527893	C2_Ca-dep	IPR000008	ENST00000394048	ENST00000267113	4	26	7	10	29	7
101646	SE	ENSG00000143469	SYT14	splice_to_last	18	1	chr1,+,210329254,210334073	C2_Ca-dep	IPR000008	ENST00000422431	ENST00000271745	14	2	0	0	0	0
132382	SE	ENSG00000077942	FBLN1	coding	324	0	chr22,+,45914666,45921422	Anaphylatoxin/fibulin	IPR000020	ENST00000402984	ENST00000262722	0	0	0	0	1	0
140155	SE	ENSG00000131844	MCCC2	coding	12	21	chr5,+,70900294,70927947	Carboxyl_trans	IPR000022	ENST00000340941	ENST00000323375	0	0	1	12	9	6
110898	SE	ENSG00000152556	PFKM	coding	13	0	chr12,+,48528820,48531503	Phosphofructokinase_dom	IPR000023	ENST00000340802	ENST00000395233	0	0	0	0	0	0
106655	MXE	ENSG00000067057	PFKP	splice_to_last	15	0.5	chr10,+,3161060,3167288__chr10,+,3167440,3172010	Phosphofructokinase_dom	IPR000023	ENST00000381125	ENST00000381085	0	0	0	0	0	0
138853	SE	ENSG00000109625	CPZ	coding	11	0	chr4,+,8594647,8602849	Frizzled_Cys-rich	IPR000024	ENST00000360986	ENST00000315782	0	0	0	0	0	0
150317	A3SS	ENSG00000147852	VLDLR	splice_to_last	13	1	chr9,+,2645744,2646398	LDLR_classB_rpt	IPR000033	ENST00000382100	ENST00000397921	0	1	2	0	0	0
121366	SE	ENSG00000128641	MYO1B	coding	46	6	chr2,+,192265193,192267357	IQ_motif_EF-hand-BS	IPR000048	ENST00000392318	ENST00000392316	9	0	6	5	8	1
121367	SE	ENSG00000128641	MYO1B	coding	133	3	chr2,+,192265193,192272840	IQ_motif_EF-hand-BS	IPR000048	ENST00000392318	ENST00000339514	0	6	3	18	19	113
144261	SE	ENSG00000106484	MEST	coding	30	13	chr7,+,130140372,130142484	AB_hydrolase_1	IPR000073	ENST00000223215	ENST00000378576	0	0	0	0	0	0
111209	A3SS	ENSG00000173598	NUDT4P1	coding	139	0	chr12,+,93789308,93792546	NUDIX_hydrolase_dom	IPR000086	ENST00000337179	ENST00000415493	107	0	214	0	44	0
115349	SE	ENSG00000140876	NUDT7	splice_to_last	20	1	chr16,+,77759480,77775478	NUDIX_hydrolase_dom	IPR000086	ENST00000268533	ENST00000437314	0	10	7	1	3	1
132367	SE	ENSG00000093000	NUP50	splice_to_last	12	0	chr22,+,45567563,45574118	NUDIX_hydrolase_dom	IPR000086	ENST00000347635	ENST00000419387	0	0	0	0	0	0
111991	SE	ENSG00000175198	PCCA	coding	40	0	chr13,+,101101558,101179928	Biotin_lipoyl	IPR000089	ENST00000376285	ENST00000416148	0	0	0	0	8	0
111993	SE	ENSG00000175198	PCCA	coding	18.5	0.5	chr13,+,101167820,101179550__chr13,+,101179597,101179928	Biotin_lipoyl	IPR000089	ENST00000376285	ENST00000376277	0	0	0	0	0	0
108965	SE	ENSG00000110435	PDHX	coding	19	1	chr11,+,34969152,35006116	Biotin_lipoyl	IPR000089	ENST00000227868	ENST00000430469	0	0	0	0	0	0
135253	A5SS	ENSG00000172936	MYD88	coding	37	1	chr3,+,38182058,38182247	Toll-Interleukin_rcpt	IPR000157	ENST00000421516	ENST00000415158	0	0	3	1	8	15
141347	A3SS	ENSG00000130396	MLLT4	coding	58	0	chr6,+,168265425,168271062	Ras-assoc	IPR000159	ENST00000400822	ENST00000366805	0	0	1	0	0	0
123102	SE	ENSG00000115163	CENPA	splice_to_last	24	4	chr2,+,27015107,27016012	Histone_H3	IPR000164	ENST00000335756	ENST00000233505	0	0	0	0	0	0
111080	A3SS	ENSG00000111640	GAPDH	non-coding	11	627	chr12,+,6645758,6645850	GlycerAld_3-P_DH	IPR000173	ENST00000229239	ENST00000448046	0	341	0	643	0	102
152266	A5SS	ENSG00000130821	SLC6A8	coding	567	11	chrX,+,152959721,152959798	Na/ntran_symport	IPR000175	ENST00000328897	ENST00000253122	2	5	1	4	0	0
150565	SE	ENSG00000135069	PSAT1	splice_to_last	67	20	chr9,+,80932719,80943896	Aminotrans_V/Cys_dSase	IPR000192	ENST00000421149	ENST00000347159	19	0	0	0	0	3
122768	SE	ENSG00000132330	SCLY	coding	8	0.5	chr2,+,238978117,238982423__chr2,+,238982487,238990349	Aminotrans_V/Cys_dSase	IPR000192	ENST00000254663	ENST00000373332	0	0	0	0	0	0
109159	A3SS	ENSG00000149131	SERPING1	coding	177	13	chr11,+,57373685,57373880	Protease_inhib_I4_serpin	IPR000215	ENST00000403558	ENST00000278407	2	4	3	4	84	9
109158	SE	ENSG00000149131	SERPING1	coding	11	0	chr11,+,57365793,57369507	Protease_inhib_I4_serpin	IPR000215	ENST00000403558	ENST00000378324	1	0	0	0	0	0
143904	A5SS	ENSG00000170632	ARMC10	non-coding	11	0	chr7,+,102724508,102727076	Armadillo	IPR000225	ENST00000323716	ENST00000306450	0	0	8	0	4	0
115108	SE	ENSG00000155393	HEATR3	coding	11	0	chr16,+,50100179,50102690	Armadillo	IPR000225	ENST00000299192	ENST00000285767	0	0	0	0	0	0
100026	SE	ENSG00000137996	RTCD1	coding	14	3	chr1,+,100732179,100733707	RNA3'_term_phos_cycl-like	IPR000228	ENST00000260563	ENST00000370128	1	4	0	1	2	0
110619	SE	ENSG00000179295	PTPN11	coding	48	8	chr12,+,112920008,112924278	Tyr_Pase_rcpt/non-rcpt	IPR000242	ENST00000392596	ENST00000351677	8	38	13	30	5	10
145656	SE	ENSG00000127947	PTPN12	coding	23	0	chr7,+,77210819,77214859	Tyr_Pase_rcpt/non-rcpt	IPR000242	ENST00000248594	ENST00000435495	1	0	0	0	0	0
144143	SE	ENSG00000106278	PTPRZ1	coding	19	2	chr7,+,121671612,121674335	Tyr_Pase_rcpt/non-rcpt	IPR000242	ENST00000393386	ENST00000449182	0	59	0	0	0	0
102706	SE	ENSG00000126088	UROD	coding	10	2	chr1,+,45478886,45479265	Uroporphyrinogen_deCOase	IPR000257	ENST00000246337	ENST00000372135	0	0	2	0	0	0
131826	SE	ENSG00000100330	MTMR3	coding	12	0	chr22,+,30416872,30418597	Znf_FYVE	IPR000306	ENST00000401950	ENST00000333027	2	0	0	0	0	0
131827	SE	ENSG00000100330	MTMR3	splice_to_last	27	17	chr22,+,30418685,30419445__chr22,+,30419471,30421618	Znf_FYVE	IPR000306	ENST00000401950	ENST00000333027	1.5	0	6	0	0.5	0
149961	SE	ENSG00000167130	DOLPP1	coding	15	0	chr9,+,131847894,131848987	P_Acid_Pase_2/haloperoxidase	IPR000326	ENST00000372546	ENST00000327812	0	0	0	0	0	0
107201	SE	ENSG00000119969	HELLS	coding	8	0.5	chr10,+,96342815,96343744__chr10,+,96343881,96347985	SNF2_N	IPR000330	ENST00000348459	ENST00000441434	0	0	0	0	0	0
138888	A3SS	ENSG00000163104	SMARCAD1	coding	321	15	chr4,+,95199883,95200079	SNF2_N	IPR000330	ENST00000359052	ENST00000354268	67	6	6	0	3	0
109123	SE	ENSG00000110536	PTPMT1	splice_to_last	9	6	chr11,+,47587537,47593022	Dual-sp_phosphatase_cat-dom	IPR000340	ENST00000326674	ENST00000326656	0	0	0	0	0	3
103292	A3SS	ENSG00000171608	PIK3CD	coding	17	0	chr1,+,9776676,9777016	PI3K_ras-bd	IPR000341	ENST00000361110	ENST00000377346	3	2	1	0	0	0
118195	MXE	ENSG00000079805	DNM2	coding	83	2.5	chr19,+,10906114,10908055__chr19,+,10908193,10909161	Dynamin_central	IPR000375	ENST00000359692	ENST00000314646	5	0	6.5	0	0	0
117924	SE	ENSG00000176890	TYMS	coding	14	1	chr18,+,662319,670691	Thymidylate_synthase	IPR000398	ENST00000323274	ENST00000323224	0	0	0	0	0	0
128379	A3SS	ENSG00000197586	ENTPD6	non-coding	28	1	chr20,+,25204792,25205797	GDA1_CD39_NTPase	IPR000407	ENST00000376652	ENST00000376641	4	1	0	2	0	3
112207	SE	ENSG00000172915	NBEA	coding	13	8	chr13,+,36202384,36220005__chr13,+,36220067,36220395	BEACH_dom	IPR000409	ENST00000400445	ENST00000379922	0	0	2	6	0	0
141758	A3SS	ENSG00000204410	none	coding	18	0	chr6,+,31728615,31728961	DNA_mismatch_repair_MutS_C	IPR000432	ENST00000375742	ENST00000375703	0	0	0	0	0	0
138465	SE	ENSG00000145362	ANK2	coding	24	0	chr4,+,114271404,114281978	Death	IPR000488	ENST00000357077	ENST00000264366	13	0	19	0	0	0
115022	SE	ENSG00000089280	FUS	splice_to_last	16	2	chr16,+,31196499,31199645	RRM_dom	IPR000504	ENST00000254108	ENST00000354711	0	0	0	0	0	0
135748	SE	ENSG00000003756	RBM5	splice_to_last	75	4	chr3,+,50137483,50140515	RRM_dom	IPR000504	ENST00000347869	ENST00000395174	0	0	0	0	1	0
135722	SE	ENSG00000004534	RBM6	coding	123	0	chr3,+,50000117,50085677	RRM_dom	IPR000504	ENST00000266022	ENST00000442092	0	0	0	0	0	0
135730	SE	ENSG00000004534	RBM6	coding	105	0	chr3,+,50012824,50085677	RRM_dom	IPR000504	ENST00000266022	ENST00000422955	0	0	0	0	5	0
118745	SE	ENSG00000104852	SNRNP70	coding	13	1	chr19,+,49604727,49605370__chr19,+,49606843,49607890	RRM_dom	IPR000504	ENST00000221448	ENST00000401730	13.5	16	2.5	0	8	0
114024	MXE	ENSG00000140416	TPM1	coding	3069	274	chr15,+,63353137,63353396__chr15,+,63353471,63354413	Tropomyosin	IPR000533	ENST00000357980	ENST00000288398	4	4.5	20.5	0	33	1
114020	SE	ENSG00000140416	TPM1	coding	2299	297	chr15,+,63335141,63336225	Tropomyosin	IPR000533	ENST00000357980	ENST00000288398	7	39	2269	8822	12	18
118775	A3SS	ENSG00000169169	CPT1C	coding	47	5	chr19,+,50208043,50208296	Carn_acyl_trans	IPR000542	ENST00000323446	ENST00000405931	0	1	0	0	0	0
145816	SE	ENSG00000005469	CROT	coding	15	1	chr7,+,86978498,86988521	Carn_acyl_trans	IPR000542	ENST00000419147	ENST00000331536	4	15	0	7	5	26
139527	SE	ENSG00000145725	HISPPD1	coding	67	1	chr5,+,102509675,102513367	His_Pase_superF_clade-2	IPR000560	ENST00000451606	ENST00000321521	35	22	17	24	15	4
100018	SE	ENSG00000162444	RBP7	coding	55	5	chr1,+,10057388,10067627	Lipocln_cytosolic_FA-bd	IPR000566	ENST00000400902	ENST00000294435	25	6	30	0	7	1
128860	MXE	ENSG00000175063	UBE2C	coding	61	3.5	chr20,+,44443108,44444028__chr20,+,44444178,44444492	UBQ-conjugat_E2	IPR000608	ENST00000356455	ENST00000335046	0	0	0	0	0	0
128856	SE	ENSG00000175063	UBE2C	coding	52	1	chr20,+,44442102,44444179	UBQ-conjugat_E2	IPR000608	ENST00000356455	ENST00000352551	0	0	0	0	0	0
122729	SE	ENSG00000184182	UBE2F	coding	12	10	chr2,+,238903450,238933982	UBQ-conjugat_E2	IPR000608	ENST00000272930	ENST00000440223	7	17	0	7	0	9
138705	SE	ENSG00000078140	UBE2K	splice_to_last	10	6	chr4,+,39776552,39779979	UBQ-conjugat_E2	IPR000608	ENST00000261427	ENST00000445950	0	8	0	0	0	0
117746	SE	ENSG00000101557	USP14	coding	217	16.5	chr18,+,166818,178932__chr18,+,179036,180235	Ubiquitin	IPR000626	ENST00000400266	ENST00000261601	11	21.5	2.5	14.5	2	0
112018	A3SS	ENSG00000213995	CARKD	splice_to_last	37	2	chr13,+,111289595,111290724	UPF_carb_kinase-rel	IPR000631	ENST00000309957	ENST00000397191	0	3	0	0	1	5
138601	SE	ENSG00000109572	CLCN3	splice_to_last	122	28	chr4,+,170634445,170641057	Cysta_beta_synth_core	IPR000644	ENST00000347613	ENST00000360642	10	79	8	18	0	9
101056	A3SS	ENSG00000186510	CLCNKA	coding	13	0	chr1,+,16358785,16358940	Cysta_beta_synth_core	IPR000644	ENST00000331433	ENST00000375692	0	0	0	0	0	0
101057	A3SS	ENSG00000184908	CLCNKB	coding	11	1	chr1,+,16382017,16382172	Cysta_beta_synth_core	IPR000644	ENST00000375679	ENST00000375667	0	0	0	0	0	0
141238	A3SS	ENSG00000120254	MTHFD1L	coding	398	0	chr6,+,151206869,151208977	THF_DH/CycHdrlase	IPR000672	ENST00000367321	ENST00000367308	0	0	0	0	0	0
112835	A3SS	ENSG00000182979	MTA1	splice_to_last	45	2	chr14,+,105930483,105930799	Znf_GATA	IPR000679	ENST00000331320	ENST00000435036	0	0	7	0	3	0
129177	A3SS	ENSG00000203880	PCMTD2	coding	31	1	chr20,+,62896781,62899320	PCMT	IPR000682	ENST00000308824	ENST00000369758	7	3	0	0	0	1
100986	SE	ENSG00000143252	SDHC	splice_to_last	9	1	chr1,+,161310444,161332118	Succ_DH_Fumarate_Rdtase_TM-su	IPR000701	ENST00000367975	ENST00000342751	0	0	0	0	0	0
135791	A3SS	ENSG00000012171	SEMA3B	non-coding	18	0	chr3,+,50311258,50311346	Succ_DH_Fumarate_Rdtase_TM-su	IPR000701	ENST00000414456	ENST00000013808	5	0	1	0	0	0
135756	SE	ENSG00000001617	SEMA3F	coding	32	0	chr3,+,50211782,50214200	Succ_DH_Fumarate_Rdtase_TM-su	IPR000701	ENST00000002829	ENST00000383726	0	0	0	1	0	0
118741	SE	ENSG00000087088	BAX	coding	15	0	chr19,+,49458855,49459454	Bcl2_BH	IPR000712	ENST00000293288	ENST00000354470	0	0	0	0	0	0
131194	SE	ENSG00000099968	BCL2L13	splice_to_last	27	3	chr22,+,18171907,18185008	Bcl2_BH	IPR000712	ENST00000317582	ENST00000399777	21	0	8	0	9	2
122425	SE	ENSG00000144524	COPS7B	splice_to_last	11	1	chr2,+,232653441,232658972	PCI_dom	IPR000717	ENST00000410017	ENST00000413197	0	0	0	0	0	0
121736	SE	ENSG00000138443	ABI2	coding	17	0.5	chr2,+,204231766,204240779__chr2,+,204240854,204244930	T_SNARE_dom	IPR000727	ENST00000295851	ENST00000261016	7	0	0	0	5	0
100714	A5SS	ENSG00000173207	CKS1B	splice_to_last	11	0	chr1,+,154947387,154950462	Cyclin-dep_kinase_reg-sub	IPR000789	ENST00000308987	ENST00000368439	0	0	0	0	1	0
134361	SE	ENSG00000168827	GFM1	coding	13.5	1.5	chr3,+,158366945,158367793__chr3,+,158367849,158369884	ProtSyn_GTP-bd	IPR000795	ENST00000264263	ENST00000458558	0	0	0	0	0	0
146158	A5SS	ENSG00000221838	AP4M1	coding	64	4	chr7,+,99699590,99700297	Clathrin_sm-chain_CS	IPR000804	ENST00000429084	ENST00000416938	0	6	0	4	0	2
111238	SE	ENSG00000120868	APAF1	coding	18	1	chr12,+,99093346,99100262	Clathrin_sm-chain_CS	IPR000804	ENST00000359972	ENST00000339433	0	20	0	0	2	1
110826	SE	ENSG00000197905	TEAD4	coding	12	0	chr12,+,3121397,3127710	TEA/ATTS	IPR000818	ENST00000359864	ENST00000358409	0	0	0	0	0	0
144863	SE	ENSG00000078549	ADCYAP1R1	coding	26	2	chr7,+,31132348,31142850	GPCR_2_secretin-like	IPR000832	ENST00000409489	ENST00000304166	15	26	4	5	0	0
103090	SE	ENSG00000117114	LPHN2	coding	245	32	chr1,+,82445643,82447491	GPCR_2_secretin-like	IPR000832	ENST00000370725	ENST00000319517	8	36	1	24	2	14
135547	A3SS	ENSG00000160801	PTH1R	coding	29	3	chr3,+,46943349,46944015	GPCR_2_secretin-like	IPR000832	ENST00000313063	ENST00000313049	0	0	0	0	0	2
145080	SE	ENSG00000183696	UPP1	splice_to_last	81	1	chr7,+,48134423,48146469	Nucleoside_phosphorylase_d	IPR000845	ENST00000331803	ENST00000395560	0	0	1	0	0	0
110699	SE	ENSG00000081760	AACS	splice_to_last	14	0	chr12,+,125619397,125626637	AMP-dep_Synth/Lig	IPR000873	ENST00000316519	ENST00000261686	0	0	0	0	0	0
128535	SE	ENSG00000131069	ACSS2	coding	34	2	chr20,+,33502239,33507237	AMP-dep_Synth/Lig	IPR000873	ENST00000253382	ENST00000336325	0	0	0	6	3	8
150139	SE	ENSG00000160323	ADAMTS13	splice_to_last	14	2	chr9,+,136305645,136309983	Thrombospondin_1_rpt	IPR000884	ENST00000371929	ENST00000338351	0	0	0	0	0	0
120663	SE	ENSG00000144229	THSD7B	coding	11	0	chr2,+,138208592,138320790	Thrombospondin_1_rpt	IPR000884	ENST00000272643	ENST00000409968	0	0	0	0	0	0
148848	SE	ENSG00000156687	UNC5D	coding	72	0	chr8,+,35541244,35544062	Thrombospondin_1_rpt	IPR000884	ENST00000416672	ENST00000287272	0	0	0	0	0	0
138464	SE	ENSG00000145362	ANK2	coding	42	3	chr4,+,114251625,114254209	ZU5	IPR000906	ENST00000357077	ENST00000361149	0	6	7	66	0	1
144719	A3SS	ENSG00000122565	CBX3	coding	53	1	chr7,+,26246129,26248085	Chromodomain	IPR000953	ENST00000337620	ENST00000409747	0	2	0	0	0	3
138449	SE	ENSG00000005059	CCDC109B	coding	9	0	chr4,+,110603897,110606406	Chromodomain	IPR000953	ENST00000394650	ENST00000421934	13	0	0	0	0	0
106467	SE	ENSG00000152455	SUV39H2	coding	14	1	chr10,+,14920917,14938844	Chromodomain	IPR000953	ENST00000354919	ENST00000378331	0	0	0	0	0	0
114200	SE	ENSG00000182511	FES	coding	21	2	chr15,+,91433713,91434783	SH2	IPR000980	ENST00000328850	ENST00000394302	0	0	0	0	0	0
116336	SE	ENSG00000141738	GRB7	splice_to_last	12	0	chr17,+,37902040,37902361	SH2	IPR000980	ENST00000445327	ENST00000309185	0	0	0	0	0	0
116795	SE	ENSG00000169696	ASPSCR1	coding	73	0	chr17,+,79970158,79974351	UBX	IPR001012	ENST00000306729	ENST00000306739	0	0	3	0	0	0
129040	A3SS	ENSG00000087460	GNAS	non-coding	294	27	chr20,+,57474039,57478582	Gprotein_alpha_su	IPR001019	ENST00000371100	ENST00000349036	1	2	0	1	0	0
129037	SE	ENSG00000087460	GNAS	non-coding	612	400	chr20,+,57470738,57478585	Gprotein_alpha_su	IPR001019	ENST00000371100	ENST00000265620	4	31	10	69	3	17
113841	A3SS	ENSG00000140320	BAHD1	coding	97	16	chr15,+,40756745,40757542	BAH_dom	IPR001025	ENST00000416165	ENST00000442618	0	0	0	0	3	3
112834	SE	ENSG00000182979	MTA1	coding	255	8	chr14,+,105911847,105916394	BAH_dom	IPR001025	ENST00000331320	ENST00000405646	0	3	0	4	0	0
122470	SE	ENSG00000135930	EIF4E2	coding	24	4	chr2,+,233421239,233428956	TIF_eIF_4E	IPR001040	ENST00000258416	ENST00000409167	0	0	0	0	0	4
152449	SE	ENSG00000102172	SMS	coding	19	2	chrX,+,21985433,21995178	Sprmine_synthase	IPR001045	ENST00000404933	ENST00000265782	0	0	0	0	0	0
121850	SE	ENSG00000078018	MAP2	coding	8	2	chr2,+,210574977,210588318__chr2,+,210588410,210590432	Tau_tubulin-bd	IPR001084	ENST00000360351	ENST00000199940	0	0	0	0	0	0
116443	SE	ENSG00000186868	MAPT	coding	11	0	chr17,+,44074029,44091608	Tau_tubulin-bd	IPR001084	ENST00000344290	ENST00000334239	1	0	0	0	0	0
111020	A3SS	ENSG00000182199	SHMT2	coding	13	21	chr12,+,57626074,57626207	Ser_HO-MeTrfase	IPR001085	ENST00000414700	ENST00000393827	0	0	0	0	0	6
111018	SE	ENSG00000182199	SHMT2	coding	290.5	55	chr12,+,57624782,57625263__chr12,+,57625342,57625495	Ser_HO-MeTrfase	IPR001085	ENST00000414700	ENST00000328923	0	2	1	0	13	6
110809	SE	ENSG00000029153	ARNTL2	coding	36	2	chr12,+,27521344,27533179	HLH_DNA-bd_dom	IPR001092	ENST00000266503	ENST00000395901	4	8	0	0	0	0
110811	SE	ENSG00000029153	ARNTL2	coding	12	1	chr12,+,27523162,27533179	HLH_DNA-bd_dom	IPR001092	ENST00000266503	ENST00000311001	0	7	0	0	0	0
118464	A3SS	ENSG00000105698	USF2	coding	11	33	chr19,+,35769694,35769872	HLH_DNA-bd_dom	IPR001092	ENST00000222305	ENST00000434131	0	28	0	39	0	18
133883	SE	ENSG00000157014	GHRLOS	splice_to_last	11	0	chr3,+,10320145,10320347__chr3,+,10320443,10320568	DNase_TatD-rel	IPR001130	ENST00000287652	ENST00000437082	0	0	0	0	1	0
101675	A3SS	ENSG00000203705	TATDN3	coding	52	43	chr1,+,212981189,212985592	DNase_TatD-rel	IPR001130	ENST00000366974	ENST00000366973	11	66	10	62	3	1
130275	A3SS	ENSG00000159140	SON	non-coding	357	44	chr21,+,34948198,34948723	Ds-RNA-bd	IPR001159	ENST00000356577	ENST00000436227	4	8	18	3	1	3
138604	MXE	ENSG00000109586	GALNT7	coding	18	2.5	chr4,+,174216993,174218945__chr4,+,174219127,174223197	Glyco_trans_2	IPR001173	ENST00000265000	ENST00000458613	3	10.5	1	0	0	0
116359	SE	ENSG00000141756	FKBP10	coding	17.5	0.5	chr17,+,39975926,39976092__chr17,+,39976274,39976520	PPIase_FKBP_dom	IPR001179	ENST00000321562	ENST00000357255	0	0	0	0	0	0
122997	SE	ENSG00000119782	FKBP1B	coding	14	16	chr2,+,24276818,24276973__chr2,+,24277061,24283683	PPIase_FKBP_dom	IPR001179	ENST00000380986	ENST00000421839	0	0	1.5	0	0	0
122999	SE	ENSG00000119782	FKBP1B	coding	13.5	7	chr2,+,24276818,24277342__chr2,+,24277409,24283683	PPIase_FKBP_dom	IPR001179	ENST00000380986	ENST00000452109	0	0	0	0	0	0
122998	SE	ENSG00000119782	FKBP1B	coding	15	3	chr2,+,24276818,24276973__chr2,+,24277409,24283683	PPIase_FKBP_dom	IPR001179	ENST00000380986	ENST00000438630	0	0	0	0	0	0
108554	SE	ENSG00000137693	YAP1	coding	181	0	chr11,+,102033301,102076623	WW_Rsp5_WWP	IPR001202	ENST00000282441	ENST00000345877	0	0	0	0	0	0
120298	A3SS	ENSG00000144136	SLC20A1	non-coding	8	0	chr2,+,113414817,113416527	Phos_transporter	IPR001204	ENST00000272542	ENST00000433924	0	0	0	0	0	0
129085	MXE	ENSG00000125885	MCM8	coding	44	2	chr20,+,5948670,5952652__chr20,+,5952682,5953701	DNA-dep_ATPase_MCM	IPR001208	ENST00000378886	ENST00000265187	0	0	0	0	0	0
115178	A3SS	ENSG00000103037	SETD6	non-coding	12	54	chr16,+,58550831,58551923	SET_dom	IPR001214	ENST00000219315	ENST00000427443	0	1	0	4	0	6
115180	A3SS	ENSG00000103037	SETD6	non-coding	13	8	chr16,+,58550831,58552084	SET_dom	IPR001214	ENST00000219315	ENST00000418480	0	0	2	0	0	3
115443	A5SS	ENSG00000185324	CDK10	non-coding	51	6	chr16,+,89753166,89755659	Ser-Thr/Tyr-Pkinase	IPR001245	ENST00000353379	ENST00000331006	1	0	0	0	0	6
108694	SE	ENSG00000149554	CHEK1	coding	422	53	chr11,+,125496727,125497501__chr11,+,125497724,125499126	Ser-Thr/Tyr-Pkinase	IPR001245	ENST00000427383	ENST00000278916	9.5	0	0	0	0	0
114105	SE	ENSG00000179335	CLK3	coding	9	1	chr15,+,74912565,74914834	Ser-Thr/Tyr-Pkinase	IPR001245	ENST00000454830	ENST00000348245	0	0	0	0	0	0
138615	SE	ENSG00000068078	FGFR3	coding	254.5	4	chr4,+,1807899,1807983__chr4,+,1808053,1808272	Ser-Thr/Tyr-Pkinase	IPR001245	ENST00000360915	ENST00000260795	7.5	3	0.5	0	0.5	0
102308	A3SS	ENSG00000182866	LCK	coding	141	14	chr1,+,32742386,32745271	Ser-Thr/Tyr-Pkinase	IPR001245	ENST00000373562	ENST00000336890	0	0	11	0	12	3
106825	MXE	ENSG00000107643	MAPK8	coding	154.5	19.5	chr10,+,49628362,49632556__chr10,+,49632627,49633930	Ser-Thr/Tyr-Pkinase	IPR001245	ENST00000374189	ENST00000374176	44.5	0	39.5	10	48.5	15
112796	SE	ENSG00000075413	MARK3	coding	162	37	chr14,+,103923548,103928741	Ser-Thr/Tyr-Pkinase	IPR001245	ENST00000335102	ENST00000216288	23	54	19	55	2	22
141624	A3SS	ENSG00000204580	none	coding	567	39	chr6,+,30864917,30865155	Ser-Thr/Tyr-Pkinase	IPR001245	ENST00000454612	ENST00000324771	12	9	1	0	0	1
151998	SE	ENSG00000134602	none	coding	101	22	chrX,+,131188888,131197460	Ser-Thr/Tyr-Pkinase	IPR001245	ENST00000370887	ENST00000312420	0	0	0	2	0	0
149025	SE	ENSG00000104312	RIPK2	splice_to_last	31	2	chr8,+,90770460,90777568	Ser-Thr/Tyr-Pkinase	IPR001245	ENST00000220751	ENST00000434294	0	0	0	0	0	0
132340	MXE	ENSG00000186654	PRR5	coding	109.5	0.5	chr22,+,45182485,45204186__chr22,+,45204317,45210551	CRAL-bd_TRIO_C	IPR001251	ENST00000352766	ENST00000389772	0	0	0	0	0.5	0
132342	SE	ENSG00000186654	PRR5	coding	156.5	7	chr22,+,45198043,45204186__chr22,+,45204317,45210551	CRAL-bd_TRIO_C	IPR001251	ENST00000352766	ENST00000336963	0	0	0	0	0.5	0
132343	SE	ENSG00000186654	PRR5	coding	51	6.5	chr22,+,45198043,45204186__chr22,+,45204611,45210551	CRAL-bd_TRIO_C	IPR001251	ENST00000352766	ENST00000447333	0	0	0	0	0	0
132344	SE	ENSG00000186654	PRR5	coding	51.5	6.5	chr22,+,45198043,45204186__chr22,+,45204962,45210551	CRAL-bd_TRIO_C	IPR001251	ENST00000352766	ENST00000336995	0	0	0	0	0	0
132345	SE	ENSG00000186654	PRR5	coding	52.5	6.5	chr22,+,45198043,45204186__chr22,+,45204977,45210551	CRAL-bd_TRIO_C	IPR001251	ENST00000352766	ENST00000389774	0	0	0	0	0	0
112215	SE	ENSG00000188811	NHLRC3	coding	27	1	chr13,+,39613847,39618226	NHL_repeat	IPR001258	ENST00000379600	ENST00000379599	6	7	0	10	0	2
140236	A3SS	ENSG00000153113	CAST	coding	51	15	chr5,+,96098075,96100927	Prot_inh_calpain	IPR001259	ENST00000395813	ENST00000283095	9	13	110	86	44	12
140234	SE	ENSG00000153113	CAST	coding	126	4	chr5,+,96075821,96076969	Prot_inh_calpain	IPR001259	ENST00000395813	ENST00000325674	0	6	0	33	0	15
110706	SE	ENSG00000151948	GLT1D1	coding	11	0	chr12,+,129383831,129429870	Glyco_trans_1	IPR001296	ENST00000442111	ENST00000281703	1	0	0	0	3	0
135934	SE	ENSG00000136068	FLNB	coding	41	0	chr3,+,58116634,58118534	Filamin	IPR001298	ENST00000429972	ENST00000295956	0	0	0	0	5	13
135936	SE	ENSG00000136068	FLNB	coding	75	0	chr3,+,58124255,58128376	Filamin	IPR001298	ENST00000429972	ENST00000358537	0	0	1	0	0	0
122821	SE	ENSG00000142330	CAPN10	coding	22.5	0	chr2,+,241534720,241535350__chr2,+,241535568,241535735	Peptidase_C2_calpain_cat	IPR001300	ENST00000391984	ENST00000416591	0	0	0	0	5	0
111230	SE	ENSG00000069493	CLEC2D	splice_to_last	21	3	chr12,+,9845526,9847355	C-type_lectin	IPR001304	ENST00000261340	ENST00000261339	0	0	0	0	0	0
114133	SE	ENSG00000041357	PSMA4	coding	28	5	chr15,+,78834560,78836531	Proteasome_sua/b	IPR001353	ENST00000044462	ENST00000413382	0	9	0	0	0	0
149799	SE	ENSG00000167081	PBX3	coding	65	9	chr9,+,128697885,128722962	Homeobox	IPR001356	ENST00000373487	ENST00000342287	0	0	2	10	0	0
113883	SE	ENSG00000168803	ADAL	coding	8	0	chr15,+,43638177,43641104	A/AMP_deaminase	IPR001365	ENST00000422466	ENST00000428046	3	0	8	0	0	5
116729	SE	ENSG00000089685	BIRC5	coding	359	131	chr17,+,76210869,76212744	BIR	IPR001370	ENST00000301633	ENST00000350051	0	0	0	0	0	0
116731	SE	ENSG00000089685	BIRC5	splice_to_last	24	1	chr17,+,76210869,76219545	BIR	IPR001370	ENST00000301633	ENST00000374948	0	0	0	0	0	0
135700	A3SS	ENSG00000164062	APEH	coding	176	5	chr3,+,49720168,49720275	Peptidase_S9	IPR001375	ENST00000438011	ENST00000296456	11	0	35	2	31	4
152387	SE	ENSG00000124333	VAMP7	coding	14	5.5	chrX,+,155130250,155149476__chrX,+,155149543,155169364	Synaptobrevin	IPR001388	ENST00000262640	ENST00000286448	15.5	0	4	10	0.5	0
145038	SE	ENSG00000106636	YKT6	splice_to_last	9.5	3	chr7,+,44250722,44251152__chr7,+,44251202,44251845	Synaptobrevin	IPR001388	ENST00000223369	ENST00000424864	0	0	0.5	0	0	0
150223	A3SS	ENSG00000188566	NDOR1	coding	81	16	chr9,+,140110468,140110545	OxRdtase_FAD/NAD-bd	IPR001433	ENST00000371521	ENST00000344894	0	0	1	0	4	0
150225	A5SS	ENSG00000188566	NDOR1	splice_to_last	9	2	chr9,+,140110617,140110723	OxRdtase_FAD/NAD-bd	IPR001433	ENST00000371521	ENST00000427047	0	0	0	0	0	0
145567	A3SS	ENSG00000127948	POR	splice_to_last	1312	14	chr7,+,75615558,75615654	OxRdtase_FAD/NAD-bd	IPR001433	ENST00000447222	ENST00000265302	3	6	1	8	23	24
102171	A3SS	ENSG00000117682	DHDDS	splice_to_last	180	14	chr1,+,26786634,26795385	UPP_synth-like	IPR001441	ENST00000360009	ENST00000236342	2	0	0	0	3	0
102163	SE	ENSG00000117682	DHDDS	coding	20	2	chr1,+,26772922,26784281	UPP_synth-like	IPR001441	ENST00000360009	ENST00000374187	2	0	0	0	2	0
102396	SE	ENSG00000214193	C1orf113	coding	8	0	chr1,+,36773425,36773989	SH3_domain	IPR001452	ENST00000453908	ENST00000312808	0	0	0	0	0	0
130287	SE	ENSG00000205726	ITSN1	coding	219	14	chr21,+,35172232,35183278	SH3_domain	IPR001452	ENST00000381318	ENST00000399326	9	74	0	32	0	10
130291	SE	ENSG00000205726	ITSN1	coding	55	4	chr21,+,35191626,35201927	SH3_domain	IPR001452	ENST00000381318	ENST00000381288	0	2	0	0	0	1
120098	SE	ENSG00000071051	NCK2	splice_to_last	81	14	chr2,+,106471744,106509437	SH3_domain	IPR001452	ENST00000233154	ENST00000451463	0	0	0	0	0	0
128668	SE	ENSG00000197122	SRC	coding	38	1	chr20,+,36014576,36022297	SH3_domain	IPR001452	ENST00000360723	ENST00000358208	0	0	0	0	0	1
100716	A3SS	ENSG00000160688	FLAD1	non-coding	88	1	chr1,+,154956541,154959941	Mopterin-bd	IPR001453	ENST00000292180	ENST00000368431	0	0	0	0	0	0
101523	A3SS	ENSG00000196188	CTSE	coding	31	1	chr1,+,206320318,206325237	Peptidase_A1	IPR001461	ENST00000361052	ENST00000358184	0	0	0	0	0	0
152445	SE	ENSG00000149970	CNKSR2	coding	26	8	chrX,+,21519705,21544984	PDZ/DHR/GLGF	IPR001478	ENST00000379510	ENST00000425654	3	18	0	0	0	0
140054	SE	ENSG00000112851	ERBB2IP	coding	17	3	chr5,+,65350778,65372143	PDZ/DHR/GLGF	IPR001478	ENST00000284037	ENST00000380935	13	57	9	31	0	7
102902	SE	ENSG00000132849	INADL	coding	8.5	4	chr1,+,62550319,62565990__chr1,+,62566079,62574108	PDZ/DHR/GLGF	IPR001478	ENST00000371158	ENST00000316485	0	0	0	9.5	0.5	0
150304	SE	ENSG00000080503	SMARCA2	coding	16	4	chr9,+,2161902,2181570	Bromodomain	IPR001487	ENST00000349721	ENST00000302401	0	42	16	27	5	8
118206	A3SS	ENSG00000127616	SMARCA4	coding	398	150	chr19,+,11152235,11168933	Bromodomain	IPR001487	ENST00000358026	ENST00000444061	3	1	0	5	0	0
128484	SE	ENSG00000088305	DNMT3B	splice_to_last	333	104	chr20,+,31390275,31395567	C5_MeTfrase	IPR001525	ENST00000328111	ENST00000348286	0	0	0	0	0	0
112293	SE	ENSG00000118939	UCHL3	coding	164	29	chr13,+,76143642,76169050	Peptidase_C12	IPR001578	ENST00000377589	ENST00000377595	8	23	9	37	20	12
135267	SE	ENSG00000157036	ENDOGL2	coding	17	0	chr3,+,38538020,38542845	DNA/RNA_non-sp_Endonuclease	IPR001604	ENST00000287675	ENST00000422077	0	3	0	3	0	1
124143	A3SS	ENSG00000168883	USP39	splice_to_last	8	30	chr2,+,85848701,85850748	Znf_UBP	IPR001607	ENST00000323701	ENST00000455732	0	4	0	1	0	4
118784	SE	ENSG00000105357	MYH14	coding	11	2	chr19,+,50756009,50760555	Myosin_head_motor_dom	IPR001609	ENST00000440075	ENST00000262269	0	0	0	0	0	0
111144	SE	ENSG00000010626	RPL13P5	coding	19	1	chr12,+,7016608,7023054	Leu-rich_rpt	IPR001611	ENST00000443597	ENST00000428946	0	0	0	0	0	0
113039	SE	ENSG00000092108	SCFD1	coding	24	0	chr14,+,31091604,31099682	Sec1-like	IPR001619	ENST00000311943	ENST00000421551	13	7	6	5	0	6
149851	SE	ENSG00000136854	STXBP1	splice_to_last	28	12	chr9,+,130444838,130453053	Sec1-like	IPR001619	ENST00000373302	ENST00000373299	4	16	1	3	0	0
119088	A3SS	ENSG00000076944	STXBP2	coding	9	1	chr19,+,7704692,7705616	Sec1-like	IPR001619	ENST00000441779	ENST00000221283	0	0	0	0	3	2
149631	SE	ENSG00000059769	GNG10	coding	39.5	6	chr9,+,114394022,114405136__chr9,+,114405373,114409386	DnaJ_N	IPR001623	ENST00000313525	ENST00000436202	6.5	0	0	0	6	0
138750	SE	ENSG00000128050	PAICS	coding	520	63	chr4,+,57308025,57312860	SAICAR_synt	IPR001636	ENST00000399688	ENST00000264221	29	19	3	5	7	23
134689	SE	ENSG00000156976	SNORA4	splice_to_last	269.5	69	chr3,+,186505670,186506098__chr3,+,186506204,186506913	Helicase_C	IPR001650	ENST00000440191	ENST00000425053	12.5	0	8	0	11	0
134780	SE	ENSG00000073282	TP63	splice_to_last	8	0	chr3,+,189604339,189611994	SAM	IPR001660	ENST00000264731	ENST00000320472	0	0	0	0	0	0
116580	SE	ENSG00000154217	PITPNC1	splice_to_last	175	20.5	chr17,+,65671657,65683181__chr17,+,65683299,65688687	PI_transfer	IPR001666	ENST00000335257	ENST00000299954	43.5	36	15	0	9.5	4
100581	SE	ENSG00000143363	PRUNE	coding	59	1	chr1,+,150990379,150997086	Pesterase_RecJ	IPR001667	ENST00000271620	ENST00000368936	0	0	2	0	0	0
118430	SE	ENSG00000105220	GPI	coding	450.5	95.5	chr19,+,34859606,34868407__chr19,+,34868490,34868639	G6P_Isomerase	IPR001672	ENST00000415930	ENST00000356487	1.5	8	21	23.5	3.5	11
108707	SE	ENSG00000110080	ST3GAL4	coding	53.5	5	chr11,+,126277528,126277993__chr11,+,126278088,126278201	Glyco_trans_29	IPR001675	ENST00000239597	ENST00000227495	16.5	0	42	0	3.5	0
114035	SE	ENSG00000157734	SNX22	coding	12	2	chr15,+,64444048,64444836	Phox	IPR001683	ENST00000325881	ENST00000380278	0	0	0	0	0	0
139563	SE	ENSG00000064652	SNX24	coding	39	5	chr5,+,122181387,122272428	Phox	IPR001683	ENST00000395451	ENST00000261369	0	0	2	5	3	3
138620	SE	ENSG00000109762	SNX25	coding	8	0	chr4,+,186267803,186274638	Phox	IPR001683	ENST00000264694	ENST00000296779	0	0	0	0	0	0
116139	SE	ENSG00000128487	CYTSB	coding	10	1	chr17,+,20163606,20209335	CH-domain	IPR001715	ENST00000261503	ENST00000395530	12	0	0	0	0	0
134891	SE	ENSG00000186001	LRCH3	splice_to_last	43	9	chr3,+,197602645,197610411	CH-domain	IPR001715	ENST00000438796	ENST00000414675	0	0	0	0	0	0
116736	A3SS	ENSG00000087157	PGS1	splice_to_last	81	1	chr17,+,76400169,76411032	PLipase_D/transphosphatidylase	IPR001736	ENST00000262764	ENST00000329897	0	0	1	2	0	0
100052	SE	ENSG00000054523	KIF1B	coding	33	6	chr1,+,10332363,10335485	Kinesin_motor_dom	IPR001752	ENST00000355249	ENST00000263934	12	126	16	15	2	23
140037	SE	ENSG00000068796	KIF2A	coding	442	57	chr5,+,61662307,61669513	Kinesin_motor_dom	IPR001752	ENST00000407818	ENST00000230731	42	64	6	19	3	12
148783	SE	ENSG00000120913	C8orf58	splice_to_last	8	0	chr8,+,22447253,22451245	Znf_LIM	IPR001781	ENST00000397760	ENST00000339162	0	0	0	0	0	0
149739	A3SS	ENSG00000106689	LHX2	coding	9	0	chr9,+,126776441,126777400	Znf_LIM	IPR001781	ENST00000446480	ENST00000373615	1	3	0	0	0	0
112298	SE	ENSG00000136153	LMO7	coding	17	5	chr13,+,76427523,76430641	Znf_LIM	IPR001781	ENST00000357063	ENST00000321797	0	0	0	2	0	0
103295	SE	ENSG00000188157	AGRN	coding	29	0	chr1,+,986216,986411__chr1,+,986422,986632	Laminin_G	IPR001791	ENST00000379370	ENST00000379364	0	0	0	0	0	0
138502	A3SS	ENSG00000196159	FAT4	splice_to_last	17	1	chr4,+,126408760,126411058	Laminin_G	IPR001791	ENST00000394329	ENST00000330166	8	6	0	0	1	3
141095	A3SS	ENSG00000196569	LAMA2	coding	36	0	chr6,+,129794496,129799837	Laminin_G	IPR001791	ENST00000368151	ENST00000354729	1	59	0	182	0	3
135891	SE	ENSG00000010318	PHF7	coding	10	0	chr3,+,52455769,52456775	Znf_RING	IPR001841	ENST00000454052	ENST00000294213	0	0	0	0	0	0
141963	SE	ENSG00000112130	RNF8	splice_to_last	8	0	chr6,+,37344808,37358517	Znf_RING	IPR001841	ENST00000373479	ENST00000229866	0	0	0	0	0	0
144437	SE	ENSG00000133612	AGAP3	coding	11	0	chr7,+,150831654,150838984	Pleckstrin_homology	IPR001849	ENST00000397238	ENST00000428334	0	0	0	0	0	0
118726	A3SS	ENSG00000105443	CYTH2	coding	8	2	chr19,+,48978205,48981325	Pleckstrin_homology	IPR001849	ENST00000427476	ENST00000452733	0	0	0	0	0	0
132124	A3SS	ENSG00000100101	NOL12	non-coding	15	4	chr22,+,38147834,38150922	Pleckstrin_homology	IPR001849	ENST00000406386	ENST00000455236	3	0	1	0	0	0
102769	SE	ENSG00000117859	OSBPL9	non-coding	9	0	chr1,+,52117712,52179674	Pleckstrin_homology	IPR001849	ENST00000447887	ENST00000337806	5	10	6	0	0	0
108631	SE	ENSG00000019144	PHLDB1	splice_to_last	184	12	chr11,+,118526399,118527392	Pleckstrin_homology	IPR001849	ENST00000361417	ENST00000356063	4	1	0	1	0	0
100925	A5SS	ENSG00000162734	PEA15	coding	9	24	chr1,+,160181439,160182899	DED	IPR001875	ENST00000368076	ENST00000368077	6	126	0	31	0	0
131785	A3SS	ENSG00000182944	EWSR1	non-coding	71	40	chr22,+,29694884,29695184	Znf_RanBP2	IPR001876	ENST00000414183	ENST00000360091	0	2	0	4	0	5
131787	A5SS	ENSG00000182944	EWSR1	non-coding	54	7	chr22,+,29695269,29695588	Znf_RanBP2	IPR001876	ENST00000414183	ENST00000360091	0	4	0	0	0	0
134058	A5SS	ENSG00000114023	FAM162A	coding	2149	100	chr3,+,122121728,122123104	Znf_RanBP2	IPR001876	ENST00000440333	ENST00000232125	28	351	44	368	87	248
144859	SE	ENSG00000078549	ADCYAP1R1	coding	15	0	chr7,+,31117712,31123755	GPCR_2_extracellular_dom	IPR001879	ENST00000409489	ENST00000409363	10	1	0	0	0	0
135543	A3SS	ENSG00000160801	PTH1R	coding	43	5	chr3,+,46935498,46937224	GPCR_2_extracellular_dom	IPR001879	ENST00000313063	ENST00000313049	0	2	4	2	16	7
135544	SE	ENSG00000160801	PTH1R	coding	20	1	chr3,+,46937358,46939344__chr3,+,46939454,46939563	GPCR_2_extracellular_dom	IPR001879	ENST00000313063	ENST00000313049	0	0	0	1.5	0	4
118262	SE	ENSG00000123146	CD97	coding	15	0	chr19,+,14501890,14508469	EGF_Ca-bd	IPR001881	ENST00000242786	ENST00000358600	0	0	0	1	0	0
132385	A3SS	ENSG00000077942	FBLN1	non-coding	22	17	chr22,+,45929777,45931135	EGF_Ca-bd	IPR001881	ENST00000402984	ENST00000437711	0	0	0	7	0	0
123337	SE	ENSG00000049323	LTBP1	splice_to_last	11	0	chr2,+,33540335,33572433	EGF_Ca-bd	IPR001881	ENST00000354476	ENST00000418533	0	0	1	8	0	0
118583	SE	ENSG00000090006	LTBP4	coding	50	0	chr19,+,41120351,41123005	EGF_Ca-bd	IPR001881	ENST00000308370	ENST00000318809	0	0	0	0	0	0
118584	SE	ENSG00000090006	LTBP4	coding	145	1	chr19,+,41120351,41125251	EGF_Ca-bd	IPR001881	ENST00000308370	ENST00000243562	0	0	1	0	0	0
149810	SE	ENSG00000136828	RALGPS1	coding	11	5	chr9,+,129796792,129815125	RasGRF_CDC25	IPR001895	ENST00000259351	ENST00000319107	0	14	0	8	0	1
118434	A3SS	ENSG00000089335	none	coding	23	3	chr19,+,35173801,35174059	Krueppel-associated_box	IPR001909	ENST00000221282	ENST00000423823	11	6	28	1	0	0
146071	SE	ENSG00000196652	ZKSCAN5	splice_to_last	10	5	chr7,+,99117531,99123435	Krueppel-associated_box	IPR001909	ENST00000326775	ENST00000454175	2	11	0	0	0	0
118360	A5SS	ENSG00000181896	ZNF101	splice_to_last	29	86	chr19,+,19788794,19789534	Krueppel-associated_box	IPR001909	ENST00000318110	ENST00000415440	0	19	0	9	0	14
145243	SE	ENSG00000197008	ZNF138	splice_to_last	11	0	chr7,+,64275421,64291828	Krueppel-associated_box	IPR001909	ENST00000307355	ENST00000437743	0	0	0	0	0	0
135466	A3SS	ENSG00000196345	ZNF167	splice_to_last	14	8	chr3,+,44609924,44611416	Krueppel-associated_box	IPR001909	ENST00000426540	ENST00000418719	0	2	0	0	0	0
118436	A3SS	ENSG00000197841	ZNF181	coding	14	0	chr19,+,35230172,35230430	Krueppel-associated_box	IPR001909	ENST00000392232	ENST00000425140	0	0	1	0	0	0
149568	A3SS	ENSG00000136870	ZNF189	coding	28	3	chr9,+,104161470,104162207	Krueppel-associated_box	IPR001909	ENST00000339664	ENST00000374861	15	0	2	0	1	0
118440	A3SS	ENSG00000168661	ZNF30	coding	45	0	chr19,+,35422896,35424531	Krueppel-associated_box	IPR001909	ENST00000439785	ENST00000303586	7	17	6	3	0	13
119022	SE	ENSG00000131845	ZNF304	splice_to_last	26	2	chr19,+,57865218,57867397	Krueppel-associated_box	IPR001909	ENST00000391705	ENST00000282286	1	0	14	2	4	9
119030	SE	ENSG00000105136	ZNF419	splice_to_last	20	0	chr19,+,58002964,58004223	Krueppel-associated_box	IPR001909	ENST00000424930	ENST00000347466	0	0	0	0	0	0
118372	A3SS	ENSG00000196268	ZNF493	coding	22	1	chr19,+,21588056,21588559	Krueppel-associated_box	IPR001909	ENST00000392288	ENST00000339914	13	5	0	0	4	0
118371	SE	ENSG00000196268	ZNF493	splice_to_last	19	0	chr19,+,21580068,21605714	Krueppel-associated_box	IPR001909	ENST00000392288	ENST00000355504	0	0	0	0	0	0
135575	A3SS	ENSG00000164048	ZNF589	splice_to_last	387	2	chr3,+,48302428,48309404	Krueppel-associated_box	IPR001909	ENST00000296437	ENST00000354698	2	0	0	0	0	0
135363	SE	ENSG00000177842	ZNF620	splice_to_last	23	1	chr3,+,40547866,40557350	Krueppel-associated_box	IPR001909	ENST00000314529	ENST00000418905	1	1	0	0	5	0
135369	SE	ENSG00000172888	ZNF621	coding	11	0	chr3,+,40567354,40571699	Krueppel-associated_box	IPR001909	ENST00000339296	ENST00000431278	0	0	0	0	0	0
102485	A3SS	ENSG00000187801	ZNF643	splice_to_last	18	0	chr1,+,40922742,40923012	Krueppel-associated_box	IPR001909	ENST00000411995	ENST00000419492	7	0	0	0	0	0
119025	SE	ENSG00000186230	ZNF749	non-coding	10	0	chr19,+,57946960,57954658	Krueppel-associated_box	IPR001909	ENST00000334181	ENST00000415248	0	0	0	0	1	0
115436	SE	ENSG00000170100	ZNF778	coding	19.5	2	chr16,+,89289690,89291126__chr16,+,89291209,89291962	Krueppel-associated_box	IPR001909	ENST00000433976	ENST00000306502	7	0	3	0	0	0
145253	SE	ENSG00000146757	ZNF92	coding	9	0	chr7,+,64838912,64853718	Krueppel-associated_box	IPR001909	ENST00000328747	ENST00000450302	6	0	0	0	0	0
145255	SE	ENSG00000146757	ZNF92	splice_to_last	44	6	chr7,+,64838912,64863253	Krueppel-associated_box	IPR001909	ENST00000328747	ENST00000431504	0	0	0	0	0	0
148903	SE	ENSG00000078668	VDAC3	coding	139	22	chr8,+,42252650,42256229	Porin_Euk	IPR001925	ENST00000417062	ENST00000022615	7	197	1	162	19	27
124204	SE	ENSG00000144115	THNSL2	splice_to_last	26	4	chr2,+,88482591,88485416	PyrdxlP-dep_enz_bsu	IPR001926	ENST00000358591	ENST00000377254	0	0	0	0	0	0
129113	A3SS	ENSG00000171858	RPS21	splice_to_last	3141	0	chr20,+,60962729,60962898	Ribosomal_S21e	IPR001931	ENST00000337102	ENST00000317311	170	0	231	0	256	0
116244	SE	ENSG00000196712	NF1	coding	12	1	chr17,+,29576136,29585361	RasGAP	IPR001936	ENST00000358273	ENST00000356175	1	22	0	5	1	11
110668	A3SS	ENSG00000139726	DENR	coding	65	330	chr12,+,123252150,123253328	TIF_SUI1	IPR001950	ENST00000455982	ENST00000280557	7	45	0	3	0	16
101723	SE	ENSG00000162551	ALPL	coding	36	0	chr1,+,21896866,21902225	Alkaline_phosphatase	IPR001952	ENST00000374840	ENST00000374830	0	0	0	0	0	0
116585	SE	ENSG00000171634	BPTF	coding	158	27	chr17,+,65955990,65959448__chr17,+,65959621,65960327	Znf_PHD	IPR001965	ENST00000321892	ENST00000342579	23	25	15	26.5	8.5	0
106587	SE	ENSG00000015171	ZMYND11	coding	34	0	chr10,+,255987,282777	Znf_PHD	IPR001965	ENST00000397962	ENST00000381607	42	7	11	0	1	7
112098	SE	ENSG00000185896	LAMP1	coding	16	4	chr13,+,113964176,113973783	Lysosome-assoc_membr_glycop	IPR002000	ENST00000332556	ENST00000397181	0	0	0	0	0	0
128809	SE	ENSG00000101104	PABPC1L	splice_to_last	12	1	chr20,+,43566831,43567766	PABP_HYD	IPR002004	ENST00000255136	ENST00000217075	0	0	0	0	0	0
152814	SE	ENSG00000196338	NLGN3	coding	20	1	chrX,+,70368055,70373326	CarbesteraseB	IPR002018	ENST00000358741	ENST00000374051	0	0	0	0	0	0
154020	SE	ENSG00000165246	NLGN4Y	coding	9	0	chrY,+,16734470,16834996	CarbesteraseB	IPR002018	ENST00000382868	ENST00000339174	3	0	0	0	0	0
154023	SE	ENSG00000165246	NLGN4Y	coding	8	0	chrY,+,16835148,16936067	CarbesteraseB	IPR002018	ENST00000382868	ENST00000339174	0	0	0	0	0	0
113042	SE	ENSG00000100473	COCH	coding	8	2.5	chr14,+,31353861,31354115__chr14,+,31354246,31354599	VWF_A	IPR002035	ENST00000216361	ENST00000382493	0	0	0.5	0	0	0
138870	SE	ENSG00000118785	SPP1	coding	35	1	chr4,+,88901277,88902626	Osteopontin	IPR002038	ENST00000395080	ENST00000237623	105	122	11	3	22	3
144202	MXE	ENSG00000128595	CALU	coding	92	6.5	chr7,+,128388857,128394582__chr7,+,128394775,128398924	EF_hand_Ca-bd	IPR002048	ENST00000342367	ENST00000449187	5	0	7.5	0	3.5	9.5
142022	SE	ENSG00000048545	GUCA1A	coding	65	8	chr6,+,42146166,42146539	EF_hand_Ca-bd	IPR002048	ENST00000372965	ENST00000053469	0	4	0	0	0	0
139685	SE	ENSG00000131503	EIF4EBP3	coding	98.5	32.5	chr5,+,139844360,139851823__chr5,+,139851879,139862164	Ankyrin_rpt	IPR002110	ENST00000253810	ENST00000246149	0	0	4	0	1.5	5
116568	SE	ENSG00000170921	TANC2	coding	9	0	chr17,+,61489490,61490903	Ankyrin_rpt	IPR002110	ENST00000389520	ENST00000424789	0	17	0	0	0	0
134277	SE	ENSG00000144935	TRPC1	coding	18	7	chr3,+,142455374,142467099	Ankyrin_rpt	IPR002110	ENST00000273482	ENST00000351106	69	291	51	51	0	4
152318	SE	ENSG00000102125	TAZ	coding	18	0	chrX,+,153641903,153647881	Acyltransferase	IPR002123	ENST00000440954	ENST00000350743	0	0	0	0	0	0
152328	SE	ENSG00000102125	TAZ	coding	14.5	5	chrX,+,153647961,153648043__chrX,+,153648084,153648370	Acyltransferase	IPR002123	ENST00000440954	ENST00000299328	0	0	0	0	0	0
106981	A3SS	ENSG00000107736	CDH23	coding	29	0	chr10,+,73337748,73375260	Cadherin	IPR002126	ENST00000224721	ENST00000398788	0	3	0	0	0	4
135408	SE	ENSG00000114857	NKTR	coding	23.5	1.5	chr3,+,42661199,42661507__chr3,+,42661534,42662920	PPIase_cyclophilin	IPR002130	ENST00000232978	ENST00000383749	0	0	0	0	0.5	0
150316	SE	ENSG00000147852	VLDLR	splice_to_last	13	0	chr9,+,2639980,2643159	LDrepeatLR_classA_rpt	IPR002172	ENST00000382100	ENST00000382096	0	0	0	1	0	0
139543	SE	ENSG00000133835	HSD17B4	coding	179	9	chr5,+,118792062,118809602	DH_sc/Rdtase_SDR	IPR002198	ENST00000414835	ENST00000256216	19	0	8	0	22	5
101038	A3SS	ENSG00000132196	HSD17B7	splice_to_last	21	0	chr1,+,162766466,162767617	DH_sc/Rdtase_SDR	IPR002198	ENST00000254521	ENST00000367913	5	4	0	0	16	0
149636	SE	ENSG00000119471	HSDL2	coding	19	0	chr9,+,115168001,115181139	DH_sc/Rdtase_SDR	IPR002198	ENST00000398805	ENST00000338786	0	0	0	11	0	0
140170	SE	ENSG00000113161	HMGCR	coding	91	10	chr5,+,74650521,74651189	HMG_CoA_Rdtase	IPR002202	ENST00000287936	ENST00000343975	0	0	0	0	0	0
123334	A3SS	ENSG00000049323	LTBP1	coding	149	0	chr2,+,33477910,33482509	Fibril-assoc	IPR002212	ENST00000354476	ENST00000402934	0	0	9	1	0	1
142249	SE	ENSG00000135297	MTO1	coding	10	1.5	chr6,+,74189848,74190015__chr6,+,74190089,74190397	GIDA-rel	IPR002218	ENST00000415954	ENST00000370300	4.5	0	0	0	0	0
142251	SE	ENSG00000135297	MTO1	coding	19	146	chr6,+,74190527,74191762	GIDA-rel	IPR002218	ENST00000415954	ENST00000357845	0	35	0	7	0	13
101272	A3SS	ENSG00000135838	NPL	splice_to_last	9	1	chr1,+,182794954,182798737	Dihydrodipicolinate_synth	IPR002220	ENST00000367553	ENST00000367552	5	0	0	0	0	0
108716	SE	ENSG00000084234	APLP2	coding	1387	21	chr11,+,129992407,129996594	Prot_inh_Kunz-m	IPR002223	ENST00000263574	ENST00000338167	10	41	18	22	14	36
118519	SE	ENSG00000167642	SPINT2	coding	84	0	chr19,+,38755637,38778515	Prot_inh_Kunz-m	IPR002223	ENST00000301244	ENST00000454580	0	0	0	0	0	0
106592	A3SS	ENSG00000120539	MASTL	coding	134	14	chr10,+,27460011,27462049	Ser/Thr_prot_kinase_dom	IPR002290	ENST00000375940	ENST00000342386	0	0	1	0	0	7
106593	SE	ENSG00000120539	MASTL	coding	14	0	chr10,+,27462187,27470408	Ser/Thr_prot_kinase_dom	IPR002290	ENST00000375940	ENST00000342386	0	0	0	0	0	0
109315	A3SS	ENSG00000142186	SCYL1	coding	41	6	chr11,+,65304220,65304507	Ser/Thr_prot_kinase_dom	IPR002290	ENST00000270176	ENST00000349495	0	3	0	2	2	1
139706	SE	ENSG00000112855	none	coding	11	3	chr5,+,140075429,140076105	aa-tRNA-synt_IIb_cons-dom	IPR002314	ENST00000230771	ENST00000419246	0	0	0	0	0	0
130567	SE	ENSG00000197381	ADARB1	coding	9	0	chr21,+,46603424,46604837	A_deamin	IPR002466	ENST00000389862	ENST00000348831	0	8	2	0	0	2
100718	SE	ENSG00000160688	FLAD1	coding	30	10	chr1,+,154961324,154962634	PAPS_reduct	IPR002500	ENST00000292180	ENST00000295530	0	0	0	0	0	0
123308	SE	ENSG00000152683	SLC30A6	coding	21	0	chr2,+,32400429,32409341	Cation_efflux	IPR002524	ENST00000379343	ENST00000282587	0	1	1	0	1	0
123312	SE	ENSG00000152683	SLC30A6	splice_to_last	40	1	chr2,+,32419051,32422775	Cation_efflux	IPR002524	ENST00000379343	ENST00000449777	0	10	0	0	0	0
109541	A3SS	ENSG00000183020	AP2A2	coding	74	2	chr11,+,984752,985434	Clathrin/coatomer_adapt-like_N	IPR002553	ENST00000332231	ENST00000417081	3	3	0	1	0	4
112782	SE	ENSG00000078304	PPP2R5C	splice_to_last	9	0	chr14,+,102368225,102375925	PP2A_B56	IPR002554	ENST00000328724	ENST00000334756	9	0	0	0	0	0
116257	SE	ENSG00000141314	RHBDL3	coding	70	9	chr17,+,30625222,30632359__chr17,+,30632459,30643250	Peptidase_S54_rhomboid	IPR002610	ENST00000431505	ENST00000269051	0	0	0	0	0	0
101031	A3SS	ENSG00000117143	UAP1	coding	44	2	chr1,+,162560300,162562524	UDPGP_trans	IPR002618	ENST00000271469	ENST00000367924	0	0	14	2	20	6
101032	SE	ENSG00000117143	UAP1	coding	99	24	chr1,+,162560300,162567581	UDPGP_trans	IPR002618	ENST00000271469	ENST00000367926	15	9	5	4	10	1
123997	SE	ENSG00000114956	DGUOK	coding	69	118	chr2,+,74174032,74185272	Deoxynucleoside_kinase	IPR002624	ENST00000264093	ENST00000348222	0	0	0	0	0	9
107139	SE	ENSG00000198682	PAPSS2	coding	15	5	chr10,+,89475599,89487040	Sulphate_adenylyltransferase	IPR002650	ENST00000456849	ENST00000361175	0	3	0	0	4	10
120214	SE	ENSG00000153093	ACOXL	splice_to_last	38	2	chr2,+,111753580,111806794	Acyl-CoA_oxidase_C	IPR002655	ENST00000439055	ENST00000443586	0	0	0	0	0	0
118987	A3SS	ENSG00000108107	RPL28	splice_to_last	128	28	chr19,+,55899415,55899610	Ribosomal_L28e	IPR002672	ENST00000458349	ENST00000344063	0	0	0	3	0	0
114074	SE	ENSG00000137818	RPLP1	coding	74	2	chr15,+,69745358,69747508	Ribosomal_L28e	IPR002672	ENST00000260379	ENST00000357790	0	5	0	22	0	9
133879	SE	ENSG00000134086	VHL	splice_to_last	10	0	chr3,+,10183870,10191470	Tumour_suppress_VHL-disease	IPR002714	ENST00000256474	ENST00000345392	0	0	0	0	0	0
142209	SE	ENSG00000124782	RREB1	coding	19	0	chr6,+,7232139,7246656	Znf_C6HC	IPR002867	ENST00000379933	ENST00000274670	0	0	0	0	0	0
110547	SE	ENSG00000136003	ISCU	coding	25.5	0.5	chr12,+,108956511,108957835__chr12,+,108957930,108958054	NIF_FeS_clus_asmbl_NifU_N	IPR002871	ENST00000311893	ENST00000338291	4	0	4.5	0	1.5	0
108933	A3SS	ENSG00000169519	METT5D1	coding	24	1	chr11,+,28311943,28318343	SAM-dep_MeTrfase_MraW	IPR002903	ENST00000407364	ENST00000406787	0	0	0	12	2	6
144074	A3SS	ENSG00000105976	MET	coding	24	2	chr7,+,116398673,116399444	IPT_TIG_rcpt	IPR002909	ENST00000318493	ENST00000397752	9	12	0	17	2	61
133992	A3SS	ENSG00000163607	GTPBP8	coding	71	0	chr3,+,112711970,112713981	MMR_HSR1_GTP-bd	IPR002917	ENST00000305485	ENST00000383678	4	0	2	0	5	0
106936	SE	ENSG00000096717	SIRT1	coding	13	3.5	chr10,+,69651311,69665919__chr10,+,69666043,69666546	NAD-dep_histone_deAcase_SIR2	IPR003000	ENST00000212015	ENST00000406900	2.5	0	0	0	3.5	0
115136	A3SS	ENSG00000198417	MT1F	coding	112	4	chr16,+,56691997,56692586	Metallothionein_sfam_euk	IPR003019	ENST00000394501	ENST00000334350	5	0	0	0	18	14
113130	SE	ENSG00000100592	DAAM1	coding	176	7	chr14,+,59798637,59806791	Actin-bd_FH2/DRF_autoreg	IPR003104	ENST00000351081	ENST00000360909	4	90	18	111	6	62
113073	SE	ENSG00000185246	PRPF39	coding	23	4.5	chr14,+,45565430,45565626__chr14,+,45565960,45566089	HAT	IPR003107	ENST00000355765	ENST00000424478	0.5	0	0	0	0	0
102434	SE	ENSG00000127603	MACF1	coding	64	5	chr1,+,39929357,39934286	GAS2_dom	IPR003108	ENST00000289893	ENST00000317713	0	10	0	0	0	6
138679	SE	ENSG00000159788	RGS12	splice_to_last	35	0	chr4,+,3429895,3432133	GoLoco_motif	IPR003109	ENST00000344733	ENST00000306648	0	0	0	2	0	0
145291	SE	ENSG00000154710	RABGEF1	coding	10	0	chr7,+,66094194,66098261__chr7,+,66098430,66103239	K_chnl_volt-dep_Kv_tetra	IPR003131	ENST00000451741	ENST00000275532	0	0	0	0	0.5	1
109384	SE	ENSG00000085733	CTTN	coding	77	7.5	chr11,+,70266615,70267575__chr11,+,70267685,70269045	Hs1_Cortactin	IPR003134	ENST00000376561	ENST00000301843	0	0	0	0	6	3
101726	A3SS	ENSG00000143353	LYPLAL1	coding	16	1	chr1,+,219352587,219366471	Phospholipase/Carboxylesterase	IPR003140	ENST00000366928	ENST00000366927	0	9	5	0	0	0
116387	A3SS	ENSG00000131467	PSME3	coding	477	53	chr17,+,40990221,40990747	Proteasome_activ_REG_bsu	IPR003186	ENST00000293362	ENST00000441946	24	23	10	3	25	18
141469	A5SS	ENSG00000198315	ZNF192	splice_to_last	10	0	chr6,+,28116615,28117260	Tscrpt_reg_SCAN	IPR003309	ENST00000330236	ENST00000457389	0	0	9	0	0	0
102484	SE	ENSG00000187801	ZNF643	non-coding	35	1	chr1,+,40916759,40922616	Tscrpt_reg_SCAN	IPR003309	ENST00000411995	ENST00000235657	0	0	0	0	0	0
103101	SE	ENSG00000117114	LPHN2	splice_to_last	754	66	chr1,+,82451038,82456074	GPCR_2_latrophilin_rcpt_C	IPR003334	ENST00000370725	ENST00000271029	31	0	64	1	42	0
101794	SE	ENSG00000143771	CNIH4	splice_to_last	73	2	chr1,+,224553692,224563496	Cornichon	IPR003377	ENST00000366860	ENST00000366857	0	0	0	0	0	0
109254	SE	ENSG00000133318	RTN3	coding	153	3	chr11,+,63449249,63517462	Reticulon	IPR003388	ENST00000377819	ENST00000341307	32	10	0	1	8	2
109257	SE	ENSG00000133318	RTN3	splice_to_last	26	1	chr11,+,63521179,63525627	Reticulon	IPR003388	ENST00000377819	ENST00000341307	0	9	7	0	0	0
102718	SE	ENSG00000173660	UQCRH	coding	132	7	chr1,+,46774798,46775568__chr1,+,46775715,46775826	Ubol_cytC_Rdtase_hinge	IPR003422	ENST00000311672	ENST00000430609	23	0	28.5	0	3.5	0
150192	A3SS	ENSG00000196642	C9orf86	coding	223	23	chr9,+,139726312,139726716	GTPase_Ras	IPR003577	ENST00000371663	ENST00000311502	1	25	2	8	1	8
123607	SE	ENSG00000119729	RHOQ	splice_to_last	9	0	chr2,+,46770326,46803225	GTPase_Ras	IPR003577	ENST00000238738	ENST00000432183	6	0	3	0	1	0
106596	SE	ENSG00000099246	RAB18	coding	166	11	chr10,+,27815817,27821435	GTPase_Rab	IPR003579	ENST00000375800	ENST00000356940	69	65	34	20	26	18
108663	A3SS	ENSG00000160703	NLRX1	splice_to_last	9	0	chr11,+,119053053,119054529	Leu-rich_rpt_RNase_inh_sub-typ	IPR003590	ENST00000409991	ENST00000409265	0	0	0	0	0	2
149016	SE	ENSG00000133739	LRRCC1	coding	16	0	chr8,+,86019633,86022349	Leu-rich_rpt_typical-subtyp	IPR003591	ENST00000360375	ENST00000399341	0	0	0	9	0	2
111084	SE	ENSG00000127311	HELB	splice_to_last	15	0	chr12,+,66704387,66709021	ATPase_AAA+_core	IPR003593	ENST00000247815	ENST00000440906	0	0	0	0	0	0
135156	A5SS	ENSG00000076242	MLH1	non-coding	9	0	chr3,+,37035380,37038109	ATPase-like_ATP-bd	IPR003594	ENST00000231790	ENST00000432299	0	0	3	0	0	0
121047	SE	ENSG00000152256	PDK1	splice_to_last	51	4	chr2,+,173431660,173435453	ATPase-like_ATP-bd	IPR003594	ENST00000392571	ENST00000431718	0	0	0	1	0	0
119011	SE	ENSG00000172270	BSG	coding	755	13	chr19,+,572700,579499	Ig_sub	IPR003599	ENST00000333511	ENST00000353555	7	1	5	14	0	3
114082	SE	ENSG00000103855	CD276	coding	505	0	chr15,+,73994933,73996516	Ig_sub	IPR003599	ENST00000318443	ENST00000318424	0	0	1	0	1	0
130124	SE	ENSG00000154639	CXADR	splice_to_last	11	3	chr21,+,18931448,18937745	Ig_sub	IPR003599	ENST00000284878	ENST00000306618	0	0	0	0	0	1
100870	A3SS	ENSG00000183853	KIRREL	coding	14	0	chr1,+,158058243,158059291	Ig_sub	IPR003599	ENST00000368173	ENST00000359209	0	0	0	0	0	0
142043	SE	ENSG00000112655	PTK7	coding	9	0	chr6,+,43100424,43109405	Ig_sub	IPR003599	ENST00000230419	ENST00000349241	0	0	0	0	0	0
151856	SE	ENSG00000101842	VSIG1	splice_to_last	8	0	chrX,+,107301430,107310165	Ig_sub	IPR003599	ENST00000444426	ENST00000217957	0	0	0	0	0	0
112788	SE	ENSG00000140153	WDR20	splice_to_last	38	21	chr14,+,102661456,102674939	Ig_sub	IPR003599	ENST00000454394	ENST00000335263	11	29	8	4	0	4
108887	SE	ENSG00000185238	PRMT3	coding	23	4.5	chr11,+,20409319,20409564__chr11,+,20409699,20411289	Znf_U1	IPR003604	ENST00000330796	ENST00000331079	0.5	0	0	0	0	0
134662	SE	ENSG00000163904	SENP2	coding	17	0	chr3,+,185332527,185337086	Peptidase_C48	IPR003653	ENST00000427465	ENST00000444509	0	0	4	0	0	0
141556	SE	ENSG00000124588	NQO2	coding	51	35	chr6,+,3012907,3017117	Flavodoxin_fold	IPR003680	ENST00000380455	ENST00000380441	0	8	0	2	0	0
109122	A3SS	ENSG00000165915	SLC39A13	coding	8	2	chr11,+,47436459,47436610	ZIP	IPR003689	ENST00000362021	ENST00000354884	0	0	0	0	2	0
148735	MXE	ENSG00000104635	SLC39A14	coding	214.5	2	chr8,+,22266008,22269549__chr8,+,22269718,22272292	ZIP	IPR003689	ENST00000359741	ENST00000240095	4.5	0	28	23.5	16	7.5
113194	SE	ENSG00000029364	SLC39A9	coding	9	0	chr14,+,69908982,69921528	ZIP	IPR003689	ENST00000031146	ENST00000336643	0	2	0	0	5	1
123449	A5SS	ENSG00000003509	C2orf56	non-coding	24	0	chr2,+,37468779,37469777	DUF185	IPR003788	ENST00000002125	ENST00000455230	0	0	0	0	0	0
131225	SE	ENSG00000093009	CDC45L	coding	27	0	chr22,+,19468567,19471384	CDC45	IPR003874	ENST00000437685	ENST00000404724	0	0	0	0	0	0
131229	SE	ENSG00000093009	CDC45L	coding	57	3	chr22,+,19481904,19483503	CDC45	IPR003874	ENST00000437685	ENST00000263201	0	0	0	0	0	0
108686	SE	ENSG00000154144	TBRG1	coding	18	4	chr11,+,124495798,124496799	FYrich_N	IPR003888	ENST00000441174	ENST00000284290	26	9	4	0	0	0
118990	SE	ENSG00000063245	EPN1	coding	143	9	chr19,+,56200359,56200662__chr19,+,56200736,56201232	Ubiquitin-int_motif	IPR003903	ENST00000411543	ENST00000270460	0	0	0.5	0	2.5	0
128802	A3SS	ENSG00000101104	PABPC1L	non-coding	28	0	chr20,+,43552896,43559158	RRM_dom_euk	IPR003954	ENST00000255136	ENST00000217074	0	0	0	0	0	2
103289	A3SS	ENSG00000117569	PTBP2	splice_to_last	199	54	chr1,+,97278661,97278831	RRM_dom_euk	IPR003954	ENST00000394184	ENST00000370194	56	399	2	23	9	12
103288	SE	ENSG00000117569	PTBP2	splice_to_last	84	11	chr1,+,97270494,97272421	RRM_dom_euk	IPR003954	ENST00000394184	ENST00000394176	23	68	11	1	0	3
115377	A3SS	ENSG00000127586	CHTF18	coding	21	0	chr16,+,842810,842965	ATPase_AAA_core	IPR003959	ENST00000317063	ENST00000262315	0	0	0	0	0	0
133993	A3SS	ENSG00000144857	BOC	coding	8	3	chr3,+,112993528,112996944	FN_III	IPR003961	ENST00000273395	ENST00000355385	0	0	0	0	0	0
101496	SE	ENSG00000163531	NFASC	coding	11	0	chr1,+,204951147,204956545	FN_III	IPR003961	ENST00000367172	ENST00000339876	0	2	0	0	0	0
101501	SE	ENSG00000163531	NFASC	coding	22	0	chr1,+,204957933,204978684	FN_III	IPR003961	ENST00000367172	ENST00000360049	0	3	2	3	0	0
102606	SE	ENSG00000142949	PTPRF	coding	1296	5	chr1,+,44064583,44069086	FN_III	IPR003961	ENST00000359947	ENST00000372412	0	3	1	0	12	9
139832	SE	ENSG00000070814	TCOF1	coding	85	11	chr5,+,149749164,149753736	TCS_treacle	IPR003993	ENST00000451292	ENST00000323668	0	0	0	0	0	0
139833	SE	ENSG00000070814	TCOF1	coding	36	2	chr5,+,149758604,149759094	TCS_treacle	IPR003993	ENST00000451292	ENST00000414526	0	0	0	0	0	0
139836	SE	ENSG00000070814	TCOF1	coding	479	41	chr5,+,149759294,149767464	TCS_treacle	IPR003993	ENST00000451292	ENST00000323668	0	0	0	0	0	1
134446	A5SS	ENSG00000136518	ACTL6A	non-coding	34	0	chr3,+,179280760,179287611	Actin-like	IPR004000	ENST00000429709	ENST00000450518	1	0	2	0	0	0
135908	SE	ENSG00000157445	CACNA2D3	coding	25	1	chr3,+,54798377,54871185	Cache	IPR004010	ENST00000288197	ENST00000438476	0	0	11	15	0	0
145818	SE	ENSG00000105784	RUNDC3B	coding	8	2	chr7,+,87280252,87329736	Run	IPR004012	ENST00000338056	ENST00000312373	248	79	10	1	28	5
100773	A3SS	ENSG00000160753	RUSC1	coding	9	0	chr1,+,155295700,155296688	Run	IPR004012	ENST00000368352	ENST00000368354	0	0	0	0	0	0
113259	SE	ENSG00000100577	GSTZ1	coding	15	1	chr14,+,77793894,77795465	Glutathione_S-Trfase_N	IPR004045	ENST00000216465	ENST00000349555	0	0	0	2	0	0
109363	SE	ENSG00000084207	GSTP1	splice_to_last	8	1	chr11,+,67352711,67353859	GST_C	IPR004046	ENST00000398606	ENST00000196968	0	0	0	0	0	0
152093	SE	ENSG00000102081	FMR1	coding	226	0	chrX,+,147019118,147022094	KH	IPR004087	ENST00000370475	ENST00000218200	123	0	20	0	30	0
102295	SE	ENSG00000121774	KHDRBS1	coding	8	1	chr1,+,32496022,32498788	KH	IPR004087	ENST00000327300	ENST00000307714	0	0	0	1	5	0
139990	SE	ENSG00000113407	TARS	coding	1381	89	chr5,+,33448836,33453393	TGS	IPR004095	ENST00000455217	ENST00000265112	12	27	6	32	16	19
100590	SE	ENSG00000143363	PRUNE	splice_to_last	16	5	chr1,+,150999802,151006281	DHHA2	IPR004097	ENST00000271620	ENST00000271619	0	0	0	4	0	1
116811	SE	ENSG00000141562	NARF	coding	51	40	chr17,+,80439086,80441591	Fe_hydrogenase_lsu_C	IPR004108	ENST00000374611	ENST00000309794	0	0	5	4	3	0
118400	SE	ENSG00000105176	C19orf2	coding	65	0	chr19,+,30433570,30476129	Prefoldin_subunit	IPR004127	ENST00000392271	ENST00000312051	81	0	36	1	26	0
110955	SE	ENSG00000123349	PFDN5	coding	84	88	chr12,+,53689422,53691633	Prefoldin_subunit	IPR004127	ENST00000334478	ENST00000351500	16	67	25	61	17	28
152805	SE	ENSG00000130055	GDPD2	coding	80	9	chrX,+,69649912,69652156	GlyceroP-diester-Pdiesterase	IPR004129	ENST00000453994	ENST00000374382	0	0	0	0	0	0
113263	SE	ENSG00000063761	ADCK1	coding	13	1	chr14,+,78288860,78353433	ABC_1	IPR004147	ENST00000238561	ENST00000341211	0	0	0	0	0	0
114153	SE	ENSG00000140600	SH3GL3	coding	28	0	chr15,+,84116329,84228004	BAR	IPR004148	ENST00000324537	ENST00000427482	71	0	0	0	0	0
103171	SE	ENSG00000097033	SH3GLB1	coding	74	19	chr1,+,87190087,87200284	BAR	IPR004148	ENST00000212369	ENST00000370558	3	24	23	133	0	26
144697	SE	ENSG00000105926	MPP6	coding	91	12	chr7,+,24663402,24681334	L27	IPR004172	ENST00000409253	ENST00000222644	0	246	0	4	0	28
152596	SE	ENSG00000102312	PORCN	coding	135	5	chrX,+,48371106,48372627	MBOAT_fam	IPR004299	ENST00000326194	ENST00000359882	0	0	0	0	0	0
106414	A3SS	ENSG00000175470	PPP2R2D	non-coding	23	3	chr10,+,133754197,133757598	MBOAT_fam	IPR004299	ENST00000455566	ENST00000398018	7	0	0	9	4	0
139900	SE	ENSG00000181163	NPM1P21	coding	254	8	chr5,+,170827213,170832305	Nucleoplasmin	IPR004301	ENST00000296930	ENST00000351986	2	2	13	0	0	1
149988	SE	ENSG00000119383	PPP2R4	coding	371	51	chr9,+,131885416,131891263	Phstyr_phstse_ac	IPR004327	ENST00000452489	ENST00000348141	26	92	0	53	4	15
135076	A3SS	ENSG00000170248	PDCD6IP	coding	249	0	chr3,+,33868071,33870344	BRO1	IPR004328	ENST00000457054	ENST00000307296	97	11	82	0	77	0
101236	SE	ENSG00000143324	XPR1	coding	8	3	chr1,+,180804180,180832843	EXS_C	IPR004342	ENST00000367590	ENST00000367589	7	0	4	22	0	0
140135	SE	ENSG00000152942	RAD17	coding	59	24	chr5,+,68667383,68667860__chr5,+,68668043,68669656	Checkpoint_prot_Rad24	IPR004582	ENST00000380774	ENST00000354868	9.5	0	3.5	0	2	0
106711	A3SS	ENSG00000095794	CREM	splice_to_last	21	7	chr10,+,35495978,35500181	TF_bZIP	IPR004827	ENST00000395895	ENST00000333809	24	14	13	3	11	0
132128	A3SS	ENSG00000100116	GCAT	coding	84	7	chr22,+,38204169,38206033	Aminotransferase_I/II	IPR004839	ENST00000323205	ENST00000248924	0	2	2	3	2	2
143846	SE	ENSG00000146828	SLC12A9	coding	20	0	chr7,+,100451999,100454489	AA-permease_dom	IPR004841	ENST00000354161	ENST00000275729	0	0	0	0	0	0
148687	MXE	ENSG00000003989	SLC7A2	coding	61	1	chr8,+,17409494,17412068__chr8,+,17412207,17415803	AA-permease_dom	IPR004841	ENST00000398090	ENST00000004531	0	7.5	0	0	0	0
102919	A3SS	ENSG00000088035	ALG6	coding	75	0	chr1,+,63872796,63876816	Glyco_trans_ALG6/ALG8	IPR004856	ENST00000431147	ENST00000371108	4	0	0	0	0	1
100115	MXE	ENSG00000174151	CYB561D1	splice_to_last	8.5	0.5	chr1,+,110036908,110037764__chr1,+,110037801,110038377	Cyt_b561_euk	IPR004877	ENST00000369868	ENST00000310611	0	0	0	0	0	0
144331	SE	ENSG00000146963	LUC7L2	coding	14	1.5	chr7,+,139045067,139059146__chr7,+,139059216,139060807	LUC7-rel	IPR004882	ENST00000354926	ENST00000456182	7	0	3.5	0	3.5	0
122396	A3SS	ENSG00000187514	PTMAP4	coding	92	0	chr2,+,232576128,232576596	Pro/parathymosin	IPR004931	ENST00000412128	ENST00000341369	0	0	0	0	1	0
119081	SE	ENSG00000099864	PALM	splice_to_last	59	5	chr19,+,736077,746284	Paralemmin	IPR004965	ENST00000338448	ENST00000264560	4	1	0	0	0	0
138741	SE	ENSG00000109184	DCUN1D4	coding	32	3	chr4,+,52765543,52779455	DUF298	IPR005176	ENST00000451288	ENST00000381441	1	17	0	0	0	0
121407	SE	ENSG00000115540	MOBKL3	coding	10	2	chr2,+,198380869,198400253	Mob1_phocein	IPR005301	ENST00000323303	ENST00000409355	3	10	10	1	0	2
128382	SE	ENSG00000101003	GINS1	splice_to_last	8	0	chr20,+,25398830,25400319__chr20,+,25400440,25405846	GINS_Psf1	IPR005339	ENST00000262460	ENST00000429262	0	0	0	0	0	0
112213	A5SS	ENSG00000120686	UFM1	coding	563	18	chr13,+,38924191,38928375	Ubiquitin-like_Ufm1	IPR005375	ENST00000379649	ENST00000437952	58	0	20	2	29	8
145179	SE	ENSG00000129103	SUMF2	coding	44	2	chr7,+,56140803,56142278	Sulphatase-mod_factor	IPR005532	ENST00000439172	ENST00000395436	0	1	0	0	2	0
145183	SE	ENSG00000129103	SUMF2	coding	8	5	chr7,+,56140803,56144526	Sulphatase-mod_factor	IPR005532	ENST00000439172	ENST00000438133	0	4	0	0	0	0
145191	SE	ENSG00000129103	SUMF2	coding	13	0	chr7,+,56141910,56144526	Sulphatase-mod_factor	IPR005532	ENST00000439172	ENST00000423763	0	0	0	0	0	0
145196	SE	ENSG00000129103	SUMF2	splice_to_last	1141.5	4.5	chr7,+,56145878,56146056__chr7,+,56146200,56147220	Sulphatase-mod_factor	IPR005532	ENST00000439172	ENST00000275607	8.5	0	5	0	10.5	0
145197	SE	ENSG00000129103	SUMF2	splice_to_last	1123.5	4.5	chr7,+,56145878,56146056__chr7,+,56146731,56147220	Sulphatase-mod_factor	IPR005532	ENST00000439172	ENST00000413756	8.5	0	5	0	10.5	0
149798	SE	ENSG00000167081	PBX3	coding	17	0	chr9,+,128510901,128691933	PBX	IPR005542	ENST00000373487	ENST00000373482	0	0	0	0	0	0
134600	A3SS	ENSG00000163882	POLR2H	splice_to_last	359	115	chr3,+,184084587,184085964	RNA_pol_Rpb8	IPR005570	ENST00000429568	ENST00000296223	1	5	9	2	22	5
134596	A5SS	ENSG00000163882	POLR2H	non-coding	11	0	chr3,+,184081361,184082753	RNA_pol_Rpb8	IPR005570	ENST00000429568	ENST00000443489	0	0	2	0	0	0
150572	A3SS	ENSG00000106829	TLE4	splice_to_last	16	0	chr9,+,82242362,82267504	Groucho/TLE_N	IPR005617	ENST00000376534	ENST00000414465	0	0	0	0	0	0
113826	SE	ENSG00000128463	TMEM85	splice_to_last	39	1	chr15,+,34520046,34521953	Groucho/TLE_N	IPR005617	ENST00000267750	ENST00000249209	0	10	0	17	0	1
110938	MXE	ENSG00000196876	SCN8A	coding	11.5	2	chr12,+,52081002,52082788__chr12,+,52082879,52093353	Ion_trans	IPR005821	ENST00000354534	ENST00000355133	7.5	56.5	0	0	1.5	12.5
131525	SE	ENSG00000133460	MIF	coding	10	0	chr22,+,24219357,24224645	Sub_transporter	IPR005828	ENST00000398356	ENST00000255830	0	0	0	2	0	0
139582	SE	ENSG00000197375	SLC22A5	coding	31	0	chr5,+,131706056,131714069	Sub_transporter	IPR005828	ENST00000435065	ENST00000245407	0	0	0	0	0	0
149836	SE	ENSG00000136856	SLC2A8	coding	9	0	chr9,+,130159564,130162185	Sub_transporter	IPR005828	ENST00000373371	ENST00000373352	0	0	0	0	0	0
149846	SE	ENSG00000136856	SLC2A8	splice_to_last	17	0	chr9,+,130167269,130169390	Sub_transporter	IPR005828	ENST00000373371	ENST00000373360	0	0	0	0	0	0
110611	SE	ENSG00000111271	ACAD10	coding	27	1	chr12,+,112147487,112150301	Dehalogen-like_hydro	IPR005834	ENST00000455480	ENST00000313698	0	0	0	17	0	13
106367	SE	ENSG00000107902	none	splice_to_last	14	0	chr10,+,126186696,126301832	Dehalogen-like_hydro	IPR005834	ENST00000368842	ENST00000368839	0	0	0	0	0	0
144292	A3SS	ENSG00000122786	CALD1	coding	34	41	chr7,+,134642862,134642962	Caldesmon_LSP	IPR006018	ENST00000361675	ENST00000422748	3	20	0	70	18	139
113814	SE	ENSG00000034053	APBA2	coding	56	2	chr15,+,29385422,29390692	PTyr_interaction_dom	IPR006020	ENST00000219865	ENST00000382938	0	5	0	0	0	0
101465	SE	ENSG00000058668	ATP2B4	coding	10	0	chr1,+,203691816,203696522	ATPase_P-typ_cation-transptr_C	IPR006068	ENST00000357681	ENST00000391954	1	0	0	2	0	0
116372	A3SS	ENSG00000033627	ATP6V0A1	coding	47	69	chr17,+,40622235,40629677	ATPase_P-typ_cation-transptr_C	IPR006068	ENST00000264649	ENST00000343619	21	429	0	16	6	9
144414	SE	ENSG00000171130	ATP6V0E2	splice_to_last	15.5	0.5	chr7,+,149572733,149575766__chr7,+,149575834,149576423	ATPase_P-typ_cation-transptr_C	IPR006068	ENST00000421974	ENST00000456496	6.5	7	2	1.5	1.5	0
144415	SE	ENSG00000171130	ATP6V0E2	splice_to_last	25	0.5	chr7,+,149572733,149575766__chr7,+,149575878,149576423	ATPase_P-typ_cation-transptr_C	IPR006068	ENST00000421974	ENST00000307445	12.5	7	2	0	1.5	0
101936	SE	ENSG00000004487	KDM1	coding	758	60	chr1,+,23385659,23395031	FAD-dep_OxRdtase	IPR006076	ENST00000400181	ENST00000356634	45	12	34	3	12	0
139670	SE	ENSG00000044115	CTNNA1	splice_to_last	1158	49	chr5,+,138268400,138269490	Vinculin/catenin	IPR006077	ENST00000355078	ENST00000302763	4	3	2	0	8	3
124076	SE	ENSG00000066032	CTNNA2	splice_to_last	544	2	chr2,+,80835442,80874709	Vinculin/catenin	IPR006077	ENST00000402739	ENST00000343114	345	44	1	0	0	0
107012	SE	ENSG00000035403	VCL	coding	72	0	chr10,+,75868913,75873941	Vinculin/catenin	IPR006077	ENST00000211998	ENST00000372755	0	2	9	1	0	3
101068	SE	ENSG00000143179	UCK2	splice_to_last	10	0	chr1,+,165860558,165872418	PRK/URK	IPR006083	ENST00000367879	ENST00000372212	0	0	0	0	0	0
120211	SE	ENSG00000153093	ACOXL	coding	72.5	4	chr2,+,111691218,111721200__chr2,+,111721289,111744684	Acyl-CoA_Oxase/DH_1	IPR006090	ENST00000439055	ENST00000389811	0	0	0	0	0	0
103039	SE	ENSG00000117054	ACADM	coding	238	131	chr1,+,76198606,76199212	Acyl-CoA_DH_N	IPR006092	ENST00000370834	ENST00000370841	32	24	80	56	52	49
138443	SE	ENSG00000138796	HADH	coding	118	12	chr4,+,108948915,108954331	3HC_DH_C	IPR006108	ENST00000351726	ENST00000309522	22	2	111	24	40	5
145891	SE	ENSG00000105793	GTPBP10	splice_to_last	13	3	chr7,+,89983862,90001468	GTP1_OBG_sub	IPR006169	ENST00000222511	ENST00000380058	0	0	0	0	2	0
118790	A3SS	ENSG00000062822	POLD1	coding	977	16	chr19,+,50910671,50912041	DNA-dir_DNA_pol_B	IPR006172	ENST00000391817	ENST00000262266	0	0	0	0	0	0
114180	SE	ENSG00000157766	ACAN	coding	9	0	chr15,+,89402647,89414612	EGF-like	IPR006210	ENST00000439576	ENST00000338824	0	0	0	0	0	0
132443	SE	ENSG00000184164	CRELD2	coding	157	2	chr22,+,50315408,50316259	Furin_repeat	IPR006212	ENST00000404488	ENST00000328268	0	0	10	3	4	1
100118	SE	ENSG00000174151	CYB561D1	splice_to_last	8.5	0.5	chr1,+,110037244,110037764__chr1,+,110037801,110038377	Cyt_b561/ferric_Rdtase_TM	IPR006593	ENST00000369868	ENST00000420578	0	0	1.5	0	0	0
138517	SE	ENSG00000090316	MAEA	coding	8	0	chr4,+,1305948,1316168	LisH_dimerisation	IPR006594	ENST00000303400	ENST00000452175	0	0	0	0	0	0
120881	SE	ENSG00000172292	LASS6	splice_to_last	9	0	chr2,+,169622257,169626019	TLC-dom	IPR006634	ENST00000392687	ENST00000305747	0	0	0	11	3	9
101842	A3SS	ENSG00000143801	PSEN2	coding	18	0	chr1,+,227079061,227079446	Peptidase_A22	IPR006639	ENST00000366782	ENST00000422240	0	0	10	0	0	0
152871	A3SS	ENSG00000102271	KLHL4	splice_to_last	10	5	chrX,+,86919934,86921474	Kelch_1	IPR006652	ENST00000373114	ENST00000373119	15	62	0	0	3	1
120634	A5SS	ENSG00000082258	CCNT2	non-coding	91	30	chr2,+,135704034,135705305	Cyclin	IPR006670	ENST00000264157	ENST00000419781	8	20	0	0	5	0
115430	A3SS	ENSG00000167515	TRAPPC2L	splice_to_last	70	106	chr16,+,88926379,88927321	Sedlin	IPR006722	ENST00000301021	ENST00000452287	2	7	0	15	0	6
152867	SE	ENSG00000147180	ZNF711	coding	62	38	chrX,+,84520260,84523299	Transcrp_activ_Zfx/Zfy-dom	IPR006794	ENST00000360700	ENST00000276123	0	9	0	0	0	0
138826	SE	ENSG00000138768	USO1	coding	660	53	chr4,+,76715053,76720774	Uso1_p115_head	IPR006953	ENST00000441296	ENST00000264904	16	39	5	97	8	29
121344	A3SS	ENSG00000138386	NAB1	coding	39	6	chr2,+,191548552,191550204	Nab1_C	IPR006986	ENST00000409581	ENST00000409641	12	25	1	21	15	8
118908	SE	ENSG00000167614	TTYH1	splice_to_last	501.5	10	chr19,+,54946863,54947007__chr19,+,54947052,54947270	Tweety	IPR006990	ENST00000376531	ENST00000376530	72.5	10.5	0	0	0	0
115453	SE	ENSG00000141002	TCF25	coding	13	1.5	chr16,+,89973729,89975373__chr16,+,89975490,89976998	bHLH_Nulp1	IPR006994	ENST00000263346	ENST00000263347	0	0	0	0	0	0
113062	SE	ENSG00000092208	SIP1	coding	18	2	chr14,+,39591746,39597483	SIP1	IPR007022	ENST00000308317	ENST00000250379	0	0	1	0	0	4
113063	SE	ENSG00000092208	SIP1	splice_to_last	14	2	chr14,+,39601271,39605643	SIP1	IPR007022	ENST00000308317	ENST00000396249	11	6	1	0	0	0
143864	A3SS	ENSG00000087087	SRRT	coding	133	11	chr7,+,100485479,100485674	Arsenate-R_2	IPR007042	ENST00000347433	ENST00000432932	0	0	0	0	0	0
114940	SE	ENSG00000103495	MAZ	splice_to_last	545	105	chr16,+,29820061,29821397	Znf_C2H2	IPR007087	ENST00000219782	ENST00000322945	1	4	20	0	0	0
102310	A3SS	ENSG00000160062	ZBTB8A	splice_to_last	35	6	chr1,+,33060823,33065868	Znf_C2H2	IPR007087	ENST00000316459	ENST00000373510	0	0	5	3	0	0
100807	A3SS	ENSG00000160783	BGLAP	coding	153	58	chr1,+,156203518,156206078	Nnf1	IPR007128	ENST00000368276	ENST00000368273	0	5	4	13	0	3
118878	A3SS	ENSG00000088038	CNOT3	non-coding	48	0	chr19,+,54648067,54649330	Not_N	IPR007207	ENST00000221232	ENST00000440571	0	0	0	0	0	0
114884	SE	ENSG00000205629	LCMT1	coding	34	9	chr16,+,25151567,25175918	LCM_MeTrfase	IPR007213	ENST00000380962	ENST00000380966	0	11	0	0	0	0
122020	SE	ENSG00000144580	RQCD1	coding	22.5	2.5	chr2,+,219445462,219445717__chr2,+,219445836,219447693	Cell_differentiation_Rcd1	IPR007216	ENST00000273064	ENST00000432877	0	0	0	0	0	0
128845	SE	ENSG00000124155	PIGT	coding	26	1	chr20,+,44049332,44052855	Gpi16	IPR007245	ENST00000279036	ENST00000372689	0	0	0	0	0	0
118311	SE	ENSG00000127226	MPV17L2	coding	69.5	2.5	chr19,+,18304843,18305586__chr19,+,18305662,18305767	Mpv17_PMP22	IPR007248	ENST00000445735	ENST00000247712	0	0	1.5	0	0.5	0
113884	A3SS	ENSG00000137822	TUBGCP4	coding	36	5	chr15,+,43689518,43690238	Spc97_Spc98	IPR007259	ENST00000399460	ENST00000260383	0	0	0	0	0	0
114110	A3SS	ENSG00000198794	SCAMP5	coding	30	0	chr15,+,75310311,75310758	SCAMP	IPR007273	ENST00000361900	ENST00000425597	6	15	0	0	0	0
101907	SE	ENSG00000173409	ARV1	coding	75	6	chr1,+,231126008,231131505	Arv1	IPR007290	ENST00000435927	ENST00000310256	33	13	18	8	4	16
144119	SE	ENSG00000004866	ST7	coding	31	1	chr7,+,116772013,116776134	ST7	IPR007311	ENST00000265437	ENST00000393443	1	44	4	4	19	46
141060	SE	ENSG00000111907	TPD52L1	splice_to_last	21	3	chr6,+,125569528,125583979	TPD52	IPR007327	ENST00000368402	ENST00000304877	0	10	0	18	4	9
129149	SE	ENSG00000101150	TPD52L2	coding	467	32	chr20,+,62505168,62514071	TPD52	IPR007327	ENST00000217121	ENST00000348257	65	32	44	32	0	18
129150	SE	ENSG00000101150	TPD52L2	coding	10	0	chr20,+,62514172,62518916	TPD52	IPR007327	ENST00000217121	ENST00000352482	0	0	0	0	0	0
129151	SE	ENSG00000101150	TPD52L2	coding	209	2	chr20,+,62514172,62520542	TPD52	IPR007327	ENST00000217121	ENST00000346249	20	0	56	1	28	0
128430	SE	ENSG00000101294	HM13	splice_to_last	729	15	chr20,+,30154097,30156922	Peptidase_A22B_SPP	IPR007369	ENST00000398174	ENST00000340852	10	0	3	0	31	9
100234	SE	ENSG00000132879	FBXO44	coding	20	2	chr1,+,11718420,11718792	F-box-assoc_dom	IPR007397	ENST00000376768	ENST00000251546	7	2	0	0	0	0
102267	SE	ENSG00000159023	EPB41	coding	18	0	chr1,+,29379823,29386933	SAB	IPR007477	ENST00000343067	ENST00000356093	0	0	10	0	1	0
102268	SE	ENSG00000159023	EPB41	splice_to_last	57	0	chr1,+,29379823,29391493	SAB	IPR007477	ENST00000343067	ENST00000347529	0	0	0	1	0	4
128610	SE	ENSG00000088367	EPB41L1	coding	377	7	chr20,+,34782281,34785780	SAB	IPR007477	ENST00000344237	ENST00000202028	20	2	5	0	3	0
116759	SE	ENSG00000173818	none	coding	20	0	chr17,+,78389620,78396005	Endonuclease-V	IPR007581	ENST00000309093	ENST00000323854	0	0	0	0	0	0
118312	SE	ENSG00000130511	SSBP4	coding	29	0	chr19,+,18541739,18542456	SSDP_ss-bd	IPR007591	ENST00000270061	ENST00000348495	0	0	0	0	0	0
102226	A3SS	ENSG00000130770	ATPIF1	splice_to_last	27	1	chr1,+,28562962,28564271	ATPase_inhibitor_IATP_mt	IPR007648	ENST00000335514	ENST00000373848	0	0	89	0	12	0
150195	SE	ENSG00000054148	PHPT1	splice_to_last	52	5.5	chr9,+,139744588,139744957__chr9,+,139745011,139745206	Ocnus	IPR007702	ENST00000371659	ENST00000371660	2.5	0	2.5	0	0	0
138863	A3SS	ENSG00000172493	AFF1	coding	14	0	chr4,+,88053559,88055625	TF_AF4/FMR2	IPR007797	ENST00000395146	ENST00000307808	0	0	0	0	0	0
152100	A5SS	ENSG00000155966	AFF2	coding	28	1	chrX,+,147733639,147743428	TF_AF4/FMR2	IPR007797	ENST00000370460	ENST00000370457	19	6	0	0	0	0
152101	SE	ENSG00000155966	AFF2	coding	9	4	chrX,+,147891443,147924489	TF_AF4/FMR2	IPR007797	ENST00000370460	ENST00000342251	0	0	0	0	0	0
123628	SE	ENSG00000095002	MSH2	coding	52	0	chr2,+,47639698,47643434	DNA_mismatch_repair_MutS_connt	IPR007860	ENST00000233146	ENST00000413880	7	1	0	0	0	0
143920	SE	ENSG00000105819	PMPCB	splice_to_last	36	1	chr7,+,102944936,102949398	Peptidase_M16_C	IPR007863	ENST00000428154	ENST00000456433	19	4	9	0	25	1
114848	A3SS	ENSG00000197006	METTL9	splice_to_last	61	99	chr16,+,21636435,21666550	DREV_MeTrfase	IPR007884	ENST00000358154	ENST00000396014	20	178	2	88	0	20
122292	SE	ENSG00000168958	MFF	coding	22	0	chr2,+,228205095,228217229	DREV_MeTrfase	IPR007884	ENST00000353339	ENST00000349901	0	0	0	0	0	0
122295	SE	ENSG00000168958	MFF	coding	51	0	chr2,+,228205095,228220392	DREV_MeTrfase	IPR007884	ENST00000353339	ENST00000354503	0	0	2	0	0	0
122300	SE	ENSG00000168958	MFF	coding	20	2	chr2,+,228207534,228220392	DREV_MeTrfase	IPR007884	ENST00000353339	ENST00000337110	0	0	1	0	0	0
122301	SE	ENSG00000168958	MFF	coding	27	0	chr2,+,228212099,228220392	DREV_MeTrfase	IPR007884	ENST00000353339	ENST00000456345	1	0	0	0	0	0
115360	SE	ENSG00000166451	CENPN	coding	11	4	chr16,+,81053880,81058319	CHL4	IPR007902	ENST00000393335	ENST00000428963	0	0	0	0	0	0
113820	A3SS	ENSG00000166922	SCG5	coding	200	49	chr15,+,32972115,32976760	Secretogranin_V	IPR007945	ENST00000300175	ENST00000413748	41	1626	0	0	11	41
102140	A3SS	ENSG00000117640	FAM54B	coding	175	0	chr1,+,26149618,26150134	DUF729	IPR007972	ENST00000336146	ENST00000374300	13	0	47	1	10	0
102141	A3SS	ENSG00000117640	FAM54B	coding	12	4	chr1,+,26153316,26156035	DUF729	IPR007972	ENST00000336146	ENST00000374307	0	37	0	23	8	2
100145	A3SS	ENSG00000184371	CSF1	coding	12	0	chr1,+,110464615,110466681	MCSF-1	IPR008001	ENST00000329608	ENST00000357302	1	0	0	0	0	1
131819	A5SS	ENSG00000184076	none	non-coding	33	0	chr22,+,30163595,30165666	Ubiquinol_cyt_c_Rdtase_QCR9	IPR008027	ENST00000332801	ENST00000401406	2	0	18	0	2	0
113790	SE	ENSG00000068793	CYFIP1	coding	107	14.5	chr15,+,22925898,22925975__chr15,+,22926064,22928128	Cytoplasmic_FMR1-int	IPR008081	ENST00000412127	ENST00000313077	17.5	20	4	0	13.5	7
121713	A3SS	ENSG00000119004	CYP20A1	coding	47	3	chr2,+,204131403,204137392	Cytoplasmic_FMR1-int	IPR008081	ENST00000429815	ENST00000356079	0	6	0	7	17	18
121714	SE	ENSG00000119004	CYP20A1	coding	13	0	chr2,+,204131403,204143295	Cytoplasmic_FMR1-int	IPR008081	ENST00000429815	ENST00000302927	0	5	0	0	8	0
139864	SE	ENSG00000055163	none	coding	43	5	chr5,+,156747809,156750928	Cytoplasmic_FMR1-int	IPR008081	ENST00000442283	ENST00000318218	16	0	0	0	1	6
101880	A3SS	ENSG00000143774	GUK1	coding	336	16	chr1,+,228333767,228334542	Guanylate_kin/L-typ_Ca_channel	IPR008145	ENST00000366719	ENST00000312726	89	14	13	6	24	6
101885	SE	ENSG00000143774	GUK1	splice_to_last	74.5	0	chr1,+,228335399,228335934__chr1,+,228336156,228336365	Guanylate_kin/L-typ_Ca_channel	IPR008145	ENST00000366719	ENST00000366723	6	0	3	0	7	0
101886	SE	ENSG00000143774	GUK1	splice_to_last	137.5	0	chr1,+,228335399,228336071__chr1,+,228336156,228336365	Guanylate_kin/L-typ_Ca_channel	IPR008145	ENST00000366719	ENST00000312726	47	0	26	0	32.5	0
101887	SE	ENSG00000143774	GUK1	splice_to_last	63	0	chr1,+,228335399,228336071__chr1,+,228336239,228336365	Guanylate_kin/L-typ_Ca_channel	IPR008145	ENST00000366719	ENST00000366722	41	0	23	0	26	0
106976	SE	ENSG00000197467	COL13A1	coding	20	2	chr10,+,71697470,71703880	Collagen	IPR008160	ENST00000356340	ENST00000357811	0	0	0	0	0	0
149661	SE	ENSG00000196739	COL27A1	coding	11	2	chr9,+,116945354,116958238	Collagen	IPR008160	ENST00000357257	ENST00000374106	0	0	0	0	0	0
115204	SE	ENSG00000217555	CKLF	coding	9	1	chr16,+,66586695,66597024	Marvel	IPR008253	ENST00000264001	ENST00000351137	8	20	0	6	3	0
115209	SE	ENSG00000217555	CKLF	splice_to_last	8	0	chr16,+,66592250,66599788	Marvel	IPR008253	ENST00000264001	ENST00000345436	0	0	0	0	2	0
135047	SE	ENSG00000153551	CMTM7	coding	35	8	chr3,+,32483504,32493883	Marvel	IPR008253	ENST00000396546	ENST00000349718	0	0	0	0	0	0
140193	SE	ENSG00000124275	MTRR	splice_to_last	38	6	chr5,+,7871035,7875370	Flavodoxin/NO_synth	IPR008254	ENST00000264668	ENST00000341013	0	0	0	0	1	7
102272	SE	ENSG00000159023	EPB41	coding	16	0	chr1,+,29391669,29435847	Band_4.1_C	IPR008379	ENST00000343067	ENST00000398863	0	0	0	0	0	0
128616	SE	ENSG00000088367	EPB41L1	coding	73	5	chr20,+,34800297,34806797	Band_4.1_C	IPR008379	ENST00000344237	ENST00000202028	0	0	0	0	0	0
109008	A3SS	ENSG00000166181	API5L1	splice_to_last	9	6	chr11,+,43357543,43363982	API5	IPR008383	ENST00000455725	ENST00000378852	0	1	0	1	0	0
124254	A3SS	ENSG00000121152	NCAPH	coding	26	9	chr2,+,97030328,97031706	Barren	IPR008418	ENST00000240423	ENST00000435349	0	0	0	0	0	0
132477	A3SS	ENSG00000025770	NCAPH2	coding	547	29	chr22,+,50960843,50960929	DUF1none32	IPR008418	ENST00000299821	ENST00000361482	3	0	0	1	1	0
152851	SE	ENSG00000102390	CXorf26	splice_to_last	32	1	chrX,+,75395447,75397450	UPF0368_met/fun	IPR008476	ENST00000373358	ENST00000373357	0	0	0	0	0	2
131265	A5SS	ENSG00000183597	C22orf25	coding	14	33	chr22,+,20024376,20030877	DUF833	IPR008551	ENST00000401833	ENST00000398042	0	14	8	79	0	6
131275	SE	ENSG00000183597	C22orf25	coding	9	1	chr22,+,20040106,20043465	DUF833	IPR008551	ENST00000401833	ENST00000399807	0	2	0	0	0	0
110796	SE	ENSG00000111790	FGFR1OP2	coding	19	7	chr12,+,27110675,27116274	DUF837	IPR008555	ENST00000229395	ENST00000327214	9	11	0	0	3	1
102394	A3SS	ENSG00000116871	MAP7D1	coding	308	33	chr1,+,36644915,36645115	E-MAP-115	IPR008604	ENST00000373151	ENST00000309824	17	0	13	6	0	0
101227	A3SS	ENSG00000143337	TOR1AIP1	coding	19	15	chr1,+,179853903,179858447	Lamina-ass_polypeptide_CLAP1C	IPR008662	ENST00000398836	ENST00000271583	1	0	6	5	4	23
118459	SE	ENSG00000105699	LSR	coding	102	0	chr19,+,35749966,35757261	LISCH7	IPR008664	ENST00000361790	ENST00000360798	0	0	0	0	5	0
114135	SE	ENSG00000185787	MORF4L1	coding	386	32	chr15,+,79172920,79178482	MRG	IPR008676	ENST00000331268	ENST00000379535	14	0	0	0	1	0
108948	A3SS	ENSG00000109911	ELP4	coding	10	0	chr11,+,31616447,31625311	Elongator_complex_protein_4	IPR008728	ENST00000395934	ENST00000265650	0	2	0	9	0	5
115102	MXE	ENSG00000102893	PHKB	coding	164	12	chr16,+,47697644,47699852__chr16,+,47699942,47703125	PHK_AB	IPR008734	ENST00000323584	ENST00000299167	35.5	46.5	52.5	22	11	0
115101	SE	ENSG00000102893	PHKB	coding	21.5	2.5	chr16,+,47495336,47497792__chr16,+,47497903,47531309	PHK_AB	IPR008734	ENST00000323584	ENST00000299167	1.5	9.5	0	0	0	3
149934	MXE	ENSG00000175287	PHYHD1	coding	9	4.5	chr9,+,131698781,131700035__chr9,+,131700056,131702647	Phytyl_CoA_dOase	IPR008775	ENST00000308941	ENST00000353176	0	0	0	0	0	0
149937	SE	ENSG00000175287	PHYHD1	coding	123	4.5	chr9,+,131698923,131700035__chr9,+,131700056,131702647	Phytyl_CoA_dOase	IPR008775	ENST00000308941	ENST00000372592	0	0	1.5	0	12.5	0
149938	SE	ENSG00000175287	PHYHD1	coding	115.5	0	chr9,+,131698923,131700035__chr9,+,131700222,131702647	Phytyl_CoA_dOase	IPR008775	ENST00000308941	ENST00000412476	0	0	1.5	0	12.5	0
128641	SE	ENSG00000118705	RPN2	coding	18	0	chr20,+,35812775,35827452	Ribophorin_II	IPR008814	ENST00000237530	ENST00000373622	0	0	0	0	0	1
128646	SE	ENSG00000118705	RPN2	coding	11	0	chr20,+,35826894,35832287	Ribophorin_II	IPR008814	ENST00000237530	ENST00000373628	0	0	0	0	0	0
128648	SE	ENSG00000118705	RPN2	coding	10.5	0	chr20,+,35827627,35828849__chr20,+,35828896,35832287	Ribophorin_II	IPR008814	ENST00000237530	ENST00000338768	0	0	1.5	0	1	0
101832	SE	ENSG00000143742	SRP9	splice_to_last	216.5	4.5	chr1,+,225971069,225974563__chr1,+,225974686,225976941	Signal_recog_particle_SRP9	IPR008832	ENST00000304786	ENST00000366839	59.5	0	16.5	0	28	0
118283	SE	ENSG00000072958	AP1M1	coding	59	2	chr19,+,16319987,16337231	Clathrin_mu_C	IPR008968	ENST00000444449	ENST00000291439	2	0	3	1	1	0
114029	SE	ENSG00000138613	APH1B	coding	8	0	chr15,+,63578826,63594543	Aph-1	IPR009294	ENST00000261879	ENST00000380343	0	0	0	0	0	0
123488	SE	ENSG00000152147	GEMIN6	splice_to_last	8	0.5	chr2,+,39006259,39006399__chr2,+,39006466,39008658	Gemin6	IPR009422	ENST00000281950	ENST00000409011	0	0	0	0	0	0
123489	SE	ENSG00000152147	GEMIN6	splice_to_last	12.5	0.5	chr2,+,39006259,39006399__chr2,+,39006582,39008658	Gemin6	IPR009422	ENST00000281950	ENST00000409566	5	0	0	0	0	0
114796	MXE	ENSG00000183793	none	coding	85.5	0	chr16,+,16427740,16429908__chr16,+,16429993,16434162	NPIP	IPR009443	ENST00000381497	ENST00000360151	9.5	0	2	0	3	0
113161	A3SS	ENSG00000125954	CHURC1	coding	36	1	chr14,+,65390843,65392724	Transcrpt_activator_Churchill	IPR009508	ENST00000448390	ENST00000359118	1	64	9	67	0	17
150047	SE	ENSG00000148358	GPR107	coding	150	2	chr9,+,132869817,132887193	TM_rcpt_euk	IPR009637	ENST00000372406	ENST00000347136	140	0	40	0	10	0
150048	SE	ENSG00000148358	GPR107	coding	46	0	chr9,+,132872704,132887193	TM_rcpt_euk	IPR009637	ENST00000372406	ENST00000372410	0	0	15	0	9	0
101126	A3SS	ENSG00000117523	BAT2D1	coding	79	3	chr1,+,171481338,171482139	BAT2_N	IPR009738	ENST00000392078	ENST00000338920	22	59	0	2	12	12
145444	A5SS	ENSG00000049540	ELN	coding	49	0	chr7,+,73474830,73475430	Pericardin-like_rpt	IPR009765	ENST00000358929	ENST00000380584	0	0	4	0	1	2
106302	SE	ENSG00000151465	CDC123	coding	8	0	chr10,+,12277121,12280455	D123	IPR009772	ENST00000281141	ENST00000378900	0	0	0	0	0	0
121488	SE	ENSG00000196141	none	coding	80	0	chr2,+,201284218,201305371	DUF1387	IPR009816	ENST00000409151	ENST00000360760	16	0	23	0	52	3
113799	SE	ENSG00000128739	SNRPN	coding	26	19	chr15,+,25165270,25207260	SNURF	IPR009847	ENST00000401453	ENST00000400097	10	172	0	58	0	0
114114	SE	ENSG00000140365	COMMD4	splice_to_last	8	0	chr15,+,75631684,75632305	HCaRG	IPR009886	ENST00000267935	ENST00000338995	0	0	0	0	0	0
108692	SE	ENSG00000149547	EI24	coding	10	0	chr11,+,125450099,125452241	EI24	IPR009890	ENST00000278903	ENST00000343678	0	0	0	0	0	0
113304	A5SS	ENSG00000133943	C14orf159	coding	8	1	chr14,+,91639746,91642277	DUF1445	IPR009906	ENST00000256324	ENST00000457117	0	0	3	13	0	0
116577	SE	ENSG00000129195	FAM64A	splice_to_last	126.5	30	chr17,+,6352726,6353347__chr17,+,6353391,6353681	DUF1466	IPR009932	ENST00000250056	ENST00000308855	0	0	0	0	0	0
140050	SE	ENSG00000113597	C5orf44	coding	55	12	chr5,+,64948371,64954194	DUF974	IPR010378	ENST00000438419	ENST00000231526	6	135	12	35	7	17
115162	SE	ENSG00000181938	GINS3	coding	54	3	chr16,+,58426690,58437001	GINS_Psf3	IPR010492	ENST00000426538	ENST00000318129	0	1	2	0	0	0
115163	SE	ENSG00000181938	GINS3	splice_to_last	15	0	chr16,+,58426690,58438402	GINS_Psf3	IPR010492	ENST00000426538	ENST00000328514	0	0	0	1	0	0
130574	A3SS	ENSG00000182871	COL18A1	coding	71	0	chr21,+,46925344,46925748	Collagenase_NC10/endostatin	IPR010515	ENST00000359759	ENST00000342220	0	0	0	0	2	0
148675	A3SS	ENSG00000185122	HSF1	splice_to_last	46	0	chr8,+,145537716,145537795	Vert_HS_TF	IPR010542	ENST00000328245	ENST00000400779	0	0	0	2	0	0
141036	SE	ENSG00000025156	HSF2	coding	94	23	chr6,+,122744830,122752574	Vert_HS_TF	IPR010542	ENST00000368455	ENST00000452194	38	39	43	47	13	5
134155	SE	ENSG00000163913	IFT122	coding	29	1	chr3,+,129177519,129180070	Vert_HS_TF	IPR010542	ENST00000296266	ENST00000347300	9	0	7	0	5	0
114081	SE	ENSG00000067141	NEO1	coding	21	0	chr15,+,73581578,73590688	Neogenin_C	IPR010560	ENST00000261908	ENST00000339362	0	1	0	0	0	0
140210	A3SS	ENSG00000152422	XRCC4	splice_to_last	45	0	chr5,+,82554495,82648949	DNA_ds_break_repair_XRCC4	IPR010585	ENST00000338635	ENST00000282268	0	0	0	0	0	0
109538	SE	ENSG00000166037	CEP57	coding	17	5	chr11,+,95555141,95560949	Centrosomal_protein_57kDa-prd	IPR010597	ENST00000325542	ENST00000325486	0	7	0	7	1	2
152446	SE	ENSG00000149970	CNKSR2	coding	38	1	chrX,+,21550184,21581355	CNKSR2	IPR010599	ENST00000379510	ENST00000433450	3	11	0	0	0	0
128635	SE	ENSG00000101084	C20orf24	splice_to_last	702	802	chr20,+,35236220,35238003__chr20,+,35238132,35240412	Rab5ip	IPR010742	ENST00000342422	ENST00000344795	86.5	236.5	21.5	112	18	78
128634	SE	ENSG00000101084	C20orf24	splice_to_last	149	718	chr20,+,35236220,35236292__chr20,+,35238132,35240412	Rab5ip	IPR010742	ENST00000342422	ENST00000397252	0	0	0	0	5.5	56.5
128636	SE	ENSG00000101084	C20orf24	splice_to_last	566.5	84.5	chr20,+,35236220,35238003__chr20,+,35238160,35240412	Rab5ip	IPR010742	ENST00000342422	ENST00000373852	86.5	0	21.5	0	15	0
128958	SE	ENSG00000022277	C20orf43	coding	103	19	chr20,+,55043821,55048356	Rab5ip	IPR010742	ENST00000357348	ENST00000023939	59	20	41	17	17	1
131201	SE	ENSG00000215193	PEX26	splice_to_last	41	10	chr22,+,18566497,18570737	Pex26	IPR010797	ENST00000399746	ENST00000428061	2	0	0	0	0	1
116458	A5SS	ENSG00000141480	ARRB2	coding	243	7	chr17,+,4619902,4620511	Arrestin-like_N	IPR011021	ENST00000412477	ENST00000346341	20	0	0	0	3	0
143879	A3SS	ENSG00000160963	EMID2	coding	169	2	chr7,+,101063379,101090970	EMI_domain	IPR011489	ENST00000397927	ENST00000313669	0	3	0	0	0	0
149781	SE	ENSG00000136933	RABEPK	coding	20	3	chr9,+,127969999,127982817	Kelch_2	IPR011498	ENST00000394125	ENST00000259460	6	14	0	1	0	0
110924	SE	ENSG00000050426	LETMD1	coding	14	0	chr12,+,51442967,51450132	LETM1	IPR011685	ENST00000448283	ENST00000380135	10	2	0	0	0	0
150664	SE	ENSG00000148110	HIATL1	splice_to_last	22	14	chr9,+,97216351,97220603	MFS_1	IPR011701	ENST00000375344	ENST00000428393	0	0	0	0	0	0
114915	SE	ENSG00000169682	SPNS1	coding	15	0	chr16,+,28992935,28993676	MFS_1	IPR011701	ENST00000452515	ENST00000334536	0	0	0	0	0	0
101100	SE	ENSG00000157191	NECAP2	splice_to_last	64.5	0	chr1,+,16778509,16782312__chr1,+,16782387,16785336	NECAP-1	IPR012466	ENST00000443980	ENST00000337132	2	0	0	0	0.5	0
121739	SE	ENSG00000138443	ABI2	coding	293	7	chr2,+,204245106,204255768	Abl-interactor_HHR_dom	IPR012849	ENST00000295851	ENST00000261016	3	14	4	5	5	0
116462	SE	ENSG00000136436	CALCOCO2	coding	43	7	chr17,+,46919248,46925425	CoCoA	IPR012852	ENST00000448105	ENST00000258947	38	44	136	68	31	29
110616	SE	ENSG00000089248	ERP29	splice_to_last	39	1	chr12,+,112451412,112459953	ERp29_N	IPR012883	ENST00000261735	ENST00000455836	4	0	0	0	0	0
123679	SE	ENSG00000068912	C2orf30	coding	21	0	chr2,+,54028978,54036350	PRKCSH	IPR012913	ENST00000185150	ENST00000378239	29	8	7	5	5	4
101150	SE	ENSG00000094975	C1orf9	coding	23	0	chr1,+,172544762,172546678__chr1,+,172546698,172546903	Sad1_UNC_C	IPR012919	ENST00000367723	ENST00000263688	12	0	2.5	0	3	0
145264	SE	ENSG00000196715	VKORC1L1	splice_to_last	72	8.5	chr7,+,65338551,65413657__chr7,+,65413766,65419060	VKOR	IPR012932	ENST00000434382	ENST00000360768	21.5	0	11.5	0	4	3.5
128559	SE	ENSG00000125991	ERGIC3	coding	991	2	chr20,+,34136617,34142814	DUF1692	IPR012936	ENST00000447986	ENST00000348547	1	0	0	0	8	1
100550	SE	ENSG00000143374	TARS2	coding	35	0	chr1,+,150464964,150470005	tRNA_SAD	IPR012947	ENST00000369064	ENST00000369051	0	0	0	0	0	0
110527	A5SS	ENSG00000198431	none	coding	329	36	chr12,+,104705189,104707022	FAD_pyr_nucl-diS_OxRdtase	IPR013027	ENST00000429002	ENST00000397736	33	1	42	0	13	3
144624	SE	ENSG00000122550	KLHL7	coding	46	6	chr7,+,23145764,23157452__chr7,+,23157582,23163395	BTB_POZ	IPR013069	ENST00000339077	ENST00000322231	0	19.5	6.5	57	0	0
134245	SE	ENSG00000163520	FBLN2	coding	113	4	chr3,+,13661330,13667944	EGF_Ca-bd_2	IPR013091	ENST00000404922	ENST00000295760	2	0	10	0	0	0
150050	SE	ENSG00000232206	none	splice_to_last	9.5	0	chr9,+,133233872,133234705__chr9,+,133234800,133235814	Ig_I-set	IPR013098	ENST00000420499	ENST00000442930	0	0	0	0	0	0
108582	SE	ENSG00000149294	NCAM1	coding	13	0	chr11,+,113085232,113102366	Immunoglobulin	IPR013151	ENST00000316851	ENST00000397960	0	17	0	16	0	2
118286	SE	ENSG00000127511	SIN3B	coding	164	9	chr19,+,16973369,16974490	HDAC_interact	IPR013194	ENST00000379803	ENST00000248054	3	1	0	0	5	0
128271	SE	ENSG00000101247	C20orf7	coding	84	0	chr20,+,13773872,13779106	Methyltransf_11	IPR013216	ENST00000378106	ENST00000378081	0	0	5	0	0	0
130603	SE	ENSG00000182362	C21orf57	coding	19	1	chr21,+,47707036,47716075	Methyltransf_11	IPR013216	ENST00000329319	ENST00000339195	0	3	0	0	0	0
134856	SE	ENSG00000163964	PIGX	coding	28	0	chr3,+,196455006,196457862	PIG_X_PBN1	IPR013233	ENST00000296333	ENST00000314118	19	0	0	0	5	0
100245	SE	ENSG00000177674	AGTRAP	coding	35.5	6	chr1,+,11805893,11806183__chr1,+,11806279,11807496	Angiotensin_II_typ1_rcpt-rel	IPR013339	ENST00000314340	ENST00000376627	0	0	0	0	0	0
123770	SE	ENSG00000173209	AHSA2	coding	42	14	chr2,+,61412752,61413580	Activator_of_Hsp9none_ATPase	IPR013339	ENST00000389584	ENST00000357022	32	26	25	9	61	7
121034	SE	ENSG00000091409	ITGA6	splice_to_last	35	4.5	chr2,+,173362827,173366499__chr2,+,173366628,173368818	Integrin_alpha_C	IPR013513	ENST00000264106	ENST00000264107	19	12	31	19.5	8.5	0
121032	SE	ENSG00000091409	ITGA6	coding	362	8	chr2,+,173335832,173338782	Int_alpha_beta-p	IPR013519	ENST00000264106	ENST00000264107	0	0	1	12	0	0
106176	SE	ENSG00000148737	TCF7L2	coding	59	6	chr10,+,114711365,114724314__chr10,+,114724382,114799783	CTNNB1-bd_N	IPR013558	ENST00000369397	ENST00000346198	0	0	0	0	2	0
106178	SE	ENSG00000148737	TCF7L2	coding	34.5	15.5	chr10,+,114799884,114849155__chr10,+,114849298,114900942	CTNNB1-bd_N	IPR013558	ENST00000369397	ENST00000352065	0	0	0	0	0	0
106179	SE	ENSG00000148737	TCF7L2	splice_to_last	34.5	15.5	chr10,+,114799884,114849158__chr10,+,114849298,114900942	CTNNB1-bd_N	IPR013558	ENST00000369397	ENST00000346198	0	0	0	0	0	0
113845	MXE	ENSG00000051180	RAD51	coding	134.5	6	chr15,+,40993398,40998374__chr15,+,40998491,41001222	DNA_recomb/repair_Rad51_C	IPR013632	ENST00000382643	ENST00000267868	0	0	0	0	0.5	0
113846	SE	ENSG00000051180	RAD51	splice_to_last	14	0	chr15,+,41021831,41023252	DNA_recomb/repair_Rad51_C	IPR013632	ENST00000382643	ENST00000423169	0	0	0	0	0	0
106358	A5SS	ENSG00000179988	PSTK	non-coding	18	1	chr10,+,124747019,124749689	Chromatin_KTI12	IPR013641	ENST00000406217	ENST00000405485	5	3	3	0	2	2
106357	SE	ENSG00000179988	PSTK	splice_to_last	31	3	chr10,+,124746477,124746849__chr10,+,124747019,124749689	Chromatin_KTI12	IPR013641	ENST00000406217	ENST00000368887	2.5	0	1.5	0	1	0
121033	SE	ENSG00000091409	ITGA6	coding	13	3	chr2,+,173352955,173355751	Integrin_alpha-2	IPR013649	ENST00000264106	ENST00000416789	0	0	0	0	0	2
152560	SE	ENSG00000130988	RGN	coding	15	0	chrX,+,46943998,46951076	SGL	IPR013658	ENST00000397180	ENST00000457380	10	0	0	0	114	31
116370	SE	ENSG00000168256	NKIRAS2	splice_to_last	350	4	chr17,+,40174657,40175671	MIRO-like	IPR013684	ENST00000316082	ENST00000307641	3	1	24	1	8	0
109287	SE	ENSG00000126432	PRDX5	coding	24	4	chr11,+,64087339,64088336	Redoxin	IPR013740	ENST00000265462	ENST00000352435	4	0	6	0	3	0
118713	SE	ENSG00000124440	HIF3A	coding	32	3	chr19,+,46807344,46811477	PAS_fold	IPR013767	ENST00000377670	ENST00000244303	0	0	0	0	0	0
121823	SE	ENSG00000163249	CCNYL1	coding	8	2	chr2,+,208602169,208606946	Cyclin-related_2	IPR013922	ENST00000295414	ENST00000339882	8	12	0	10	0	0
122564	SE	ENSG00000085978	ATG16L1	splice_to_last	74	4	chr2,+,234181697,234183321	Autophagy-rel_prot_16	IPR013923	ENST00000392018	ENST00000347464	8	0	0	0	5	0
123894	SE	ENSG00000124380	SNRNP27	splice_to_last	313	74.5	chr2,+,70124587,70130312__chr2,+,70130376,70131385	DUF1777	IPR013957	ENST00000409116	ENST00000244227	84.5	62	34.5	9.5	11	0
102479	A3SS	ENSG00000131236	CAP1	coding	27	67	chr1,+,40525129,40525741	Adenylate_cyclase-assoc_CAP_N	IPR013992	ENST00000340450	ENST00000372798	2	115	1	16	1	7
115307	SE	ENSG00000157349	DDX19B	non-coding	8	0	chr16,+,70333256,70349871	DEAD-like_helicase	IPR014001	ENST00000288071	ENST00000393657	0	0	0	0	0	0
134686	SE	ENSG00000156976	SNORA4	coding	79	1	chr3,+,186502484,186503671	DEAD-like_helicase	IPR014001	ENST00000440191	ENST00000356531	45	0	0	0	6	0
141468	A3SS	ENSG00000124535	WRNIP1	coding	8	3	chr6,+,2769115,2770428	DEAD-like_helicase	IPR014001	ENST00000380773	ENST00000380771	0	0	0	0	0	0
111044	SE	ENSG00000123297	TSFM	coding	91	28	chr12,+,58180944,58186768	Transl_elong_EFTs/EF1B_dimer	IPR014039	ENST00000323833	ENST00000350762	14	49	1	4	5	23
120465	SE	ENSG00000088179	PTPN4	coding	30	3	chr2,+,120677816,120689999	FERM-adjacent	IPR014847	ENST00000263708	ENST00000433888	0	4	0	0	0	0
120236	MXE	ENSG00000153094	BCL2L11	splice_to_last	10	0	chr2,+,111881715,111911356__chr2,+,111911480,111921709	Bcl-x_interacting	IPR015040	ENST00000393256	ENST00000415458	0	0	0	0	0	0
120247	SE	ENSG00000153094	BCL2L11	coding	10	0	chr2,+,111907723,111909398__chr2,+,111911480,111921709	Bcl-x_interacting	IPR015040	ENST00000393256	ENST00000439718	0	0	0	0	0	0
120248	SE	ENSG00000153094	BCL2L11	splice_to_last	13.5	0	chr2,+,111907723,111911356__chr2,+,111911480,111921709	Bcl-x_interacting	IPR015040	ENST00000393256	ENST00000428038	0	0	0	0	0	0
118635	SE	ENSG00000076928	ARHGEF1	coding	53	0.5	chr19,+,42392935,42396095__chr19,+,42396193,42396401	Regulat_G_prot_signal-like	IPR015212	ENST00000378152	ENST00000316079	0.5	0	1.5	0	1.5	0
135976	SE	ENSG00000163605	PPP4R2	coding	8	0	chr3,+,73047308,73108187	PPP4R2	IPR015267	ENST00000356692	ENST00000394284	4	4	0	0	2	0
117943	SE	ENSG00000060069	CTDP1	coding	27	8	chr18,+,77478015,77496354	FCP1_C	IPR015388	ENST00000299543	ENST00000075430	0	0	0	0	0	1
141140	SE	ENSG00000118513	MYB	coding	32	7	chr6,+,135517139,135520045	C-myb_C	IPR015395	ENST00000341911	ENST00000316528	0	0	0	0	0	0
121345	SE	ENSG00000115419	GLS	coding	12.5	2.5	chr2,+,191775046,191777918__chr2,+,191784973,191785749	Glutaminase	IPR015868	ENST00000320717	ENST00000417154	9.5	0	0	0	0	0
112179	A3SS	ENSG00000122034	GTF3A	splice_to_last	17	0	chr13,+,28004102,28004674	Znf_C2H2-like	IPR015880	ENST00000381140	ENST00000435781	0	0	2	0	2	0
112182	SE	ENSG00000122034	GTF3A	splice_to_last	24	15	chr13,+,28004757,28008275	Znf_C2H2-like	IPR015880	ENST00000381140	ENST00000419181	3	32	12	39	0	0
119118	A3SS	ENSG00000188629	ZNF177	splice_to_last	8	3	chr19,+,9490814,9491823	Znf_C2H2-like	IPR015880	ENST00000446085	ENST00000343499	0	0	0	0	0	0
141928	MXE	ENSG00000112062	MAPK14	coding	68.5	0	chr6,+,36044384,36063763__chr6,+,36063842,36070347	Se/Thr_prot_kinase-like_dom	IPR017442	ENST00000229795	ENST00000229794	9.5	0	20	0	22.5	0
123164	SE	ENSG00000115216	NRBP1	coding	582	174	chr2,+,27658093,27659619	Se/Thr_prot_kinase-like_dom	IPR017442	ENST00000379863	ENST00000233557	32	39	28	50	11	22
123117	MXE	ENSG00000143727	ACP1	coding	134	33	chr2,+,271938,272191__chr2,+,272304,275139	Tyr_phospatase_low_mol_wt	IPR017867	ENST00000272065	ENST00000272067	24.5	18.5	11.5	6.5	15	7.5
136069	SE	ENSG00000156983	BRPF1	coding	23	0	chr3,+,9785584,9786691	AT_hook_DNA-bd_motif	IPR017956	ENST00000383829	ENST00000433861	0	0	0	0	0	0
141903	A5SS	ENSG00000137309	HMGA1	coding	116	8	chr6,+,34208658,34210488	AT_hook_DNA-bd_motif	IPR017956	ENST00000395004	ENST00000327014	0	0	0	0	0	0
116771	A3SS	ENSG00000183048	SLC25A10	coding	224	7	chr17,+,79684520,79684813	Mitochondrial_sb/sol_carrier	IPR018108	ENST00000331531	ENST00000350690	0	0	4	1	33	6
151988	SE	ENSG00000102078	SLC25A14	coding	10	13	chrX,+,129492708,129498601	Mitochondrial_sb/sol_carrier	IPR018108	ENST00000339231	ENST00000218197	7	9	0	4	0	0
142129	A3SS	ENSG00000153291	SLC25A27	splice_to_last	43	15	chr6,+,46638964,46644383	Mitochondrial_sb/sol_carrier	IPR018108	ENST00000371347	ENST00000417490	21	153	5	5	4	27
111236	MXE	ENSG00000075415	SLC25A3	coding	1255.5	39	chr12,+,98987912,98989504__chr12,+,98989625,98991633	Mitochondrial_sb/sol_carrier	IPR018108	ENST00000228318	ENST00000188376	38.5	0	13.5	0	30	0
102431	SE	ENSG00000127603	MACF1	coding	64	3	chr1,+,39838267,39844874	Spectrin/alpha-actinin	IPR018159	ENST00000289893	ENST00000317713	30	21	29	53	5	17
149907	SE	ENSG00000197694	SPTAN1	coding	59	9	chr9,+,131353903,131356453	Spectrin/alpha-actinin	IPR018159	ENST00000372739	ENST00000372719	5	26	11	53	1	1
149908	SE	ENSG00000197694	SPTAN1	coding	39	14	chr9,+,131371562,131373992	Spectrin/alpha-actinin	IPR018159	ENST00000372739	ENST00000372719	0	24	6	36	0	11
100753	SE	ENSG00000169241	RAG1AP1	coding	38	0	chr1,+,155108851,155110036	MtN3_saliva_TM_cons-reg	IPR018169	ENST00000368404	ENST00000303332	5	0	0	0	2	0
100754	SE	ENSG00000169241	RAG1AP1	coding	16	9	chr1,+,155109426,155110454	MtN3_saliva_TM_cons-reg	IPR018169	ENST00000368404	ENST00000303343	0	0	0	0	1	0
131990	A3SS	ENSG00000100284	TOM1	coding	58	0	chr22,+,35718029,35719020	VHS_subgroup	IPR018205	ENST00000451197	ENST00000382034	7	0	4	0	6	0
118541	MXE	ENSG00000130402	ACTN4	coding	34.5	12.5	chr19,+,39217742,39218955__chr19,+,39219020,39219635	EF-hand	IPR018248	ENST00000252699	ENST00000440400	0	0	0	0	0	0
128630	SE	ENSG00000101335	MYL9	splice_to_last	12	0	chr20,+,35173470,35177479	EF-hand	IPR018248	ENST00000279022	ENST00000346786	0	0	0	0	0	0
132417	A3SS	ENSG00000100416	TRMU	non-coding	21	4	chr22,+,46742440,46746242	tRNA_MeTrfase-like	IPR018318	ENST00000290846	ENST00000424260	0	3	3	1	3	0
132416	SE	ENSG00000100416	TRMU	splice_to_last	85	29	chr22,+,46733840,46742318	tRNA_MeTrfase-like	IPR018318	ENST00000290846	ENST00000381021	2	17	0	0	0	0
148860	SE	ENSG00000129691	ASH2L	coding	13	1	chr8,+,37991063,37996333	SPla/RYanodine_receptor_sg	IPR018355	ENST00000343823	ENST00000250635	0	0	0	0	0	0
102867	SE	ENSG00000172456	FGGY	coding	23	5	chr1,+,60104046,60125890	Carb_kinase_FGGY_C	IPR018485	ENST00000371218	ENST00000303721	7	0	14	27	37	40
152840	A3SS	ENSG00000147162	OGT	coding	9	10	chrX,+,70753185,70756057	TPR_repeat	IPR019734	ENST00000373719	ENST00000373701	0	67	0	23	0	22
112273	SE	ENSG00000165416	SUGT1	coding	136	5	chr13,+,53233383,53236783	TPR_repeat	IPR019734	ENST00000343788	ENST00000310528	27	23	8	4	3	6
102263	SE	ENSG00000159023	EPB41	coding	9	0	chr1,+,29320053,29338376	Band_41_domain	IPR019749	ENST00000343067	ENST00000347529	0	0	0	0	0	0
117290	AFE	ENSG00000108825	AARSD1	coding	97	0	chr17,-,41116253,41116418	NA	NA	ENST00000421990	ENST00000427569	1	0	5	0	3	0
117291	AFE	ENSG00000108825	AARSD1	coding	10	0	chr17,-,41116253,41116459	NA	NA	ENST00000421990	ENST00000416949	1	0	0	0	0	0
117292	ALE	ENSG00000108825	AARSD1	coding	31	18	chr17,-,41121202,41122305	NA	NA	ENST00000421990	ENST00000409446	0	9	17	29	0	0
139338	AFE	ENSG00000182903	ABCA11P	coding	291	21	chr4,-,466489,467769	NA	NA	ENST00000338977	ENST00000400168	25	0	4	0	11	0
151145	AFE	ENSG00000107331	ABCA2	coding	50	0	chr9,-,139918687,139922526	NA	NA	ENST00000355090	ENST00000265662	11	0	2	0	0	1
151142	ALE	ENSG00000107331	ABCA2	coding	28	0	chr9,-,139917503,139918594	NA	NA	ENST00000355090	ENST00000398207	0	4	0	0	0	0
111441	AFE	ENSG00000150967	ABCB9	coding	36	0	chr12,-,123444868,123450833	NA	NA	ENST00000392439	ENST00000280560	3	0	0	0	4	0
146828	AFE	ENSG00000033050	ABCF2	coding	21	2	chr7,-,150923585,150923942	NA	NA	ENST00000222388	ENST00000441774	0	0	0	0	0	0
129319	ALE	ENSG00000100997	ABHD12	coding	112	70	chr20,-,25281519,25282854	NA	NA	ENST00000376542	ENST00000339157	0	6	0	0	0	0
135867	AFE	ENSG00000114786	ABHD14A	coding	56	0	chr3,+,52017604,52018062	NA	NA	ENST00000458031	ENST00000404366	0	0	1	0	10	0
154918	other	ENSG00000136754	ABI1	na	43	20	chr10,-,27048163,27054146	NA	NA	ENST00000355394	ENST00000359188	0	34	0	8	0	9
150085	AFE	ENSG00000097007	ABL1	coding	52	0	chr9,+,133710911,133729450	NA	NA	ENST00000372348	ENST00000318560	5	6	14	0	0	1
107443	AFE	ENSG00000099204	ABLIM1	coding	144	27	chr10,-,116251636,116286418	NA	NA	ENST00000369262	ENST00000369257	2	6	0	4	0	0
117101	AFE	ENSG00000132142	ACACA	coding	18	5	chr17,-,35696809,35715941	NA	NA	ENST00000353139	ENST00000394403	0	0	0	0	0	1
113484	AFE	ENSG00000100813	ACIN1	coding	185	4	chr14,-,23538825,23540333	NA	NA	ENST00000262710	ENST00000397341	0	0	0	0	0	0
113486	AFE	ENSG00000100813	ACIN1	coding	54	0	chr14,-,23538825,23540635	NA	NA	ENST00000262710	ENST00000338631	0	0	0	0	0	0
102809	ALE	ENSG00000162390	ACOT11	coding	39	0	chr1,+,55073740,55074629	NA	NA	ENST00000371316	ENST00000343744	0	0	2	2	0	0
105750	AFE	ENSG00000097021	ACOT7	coding	94	1	chr1,-,6409925,6453316	NA	NA	ENST00000377855	ENST00000361521	1	1	0	0	1	0
129749	ALE	ENSG00000101473	ACOT8	coding	12	0	chr20,-,44482617,44483797	NA	NA	ENST00000217455	ENST00000426915	0	0	0	0	0	0
129750	ALE	ENSG00000101473	ACOT8	coding	8	0	chr20,-,44482622,44483797	NA	NA	ENST00000217455	ENST00000372531	0	0	0	0	0	0
155764	other	ENSG00000161533	ACOX1	na	17	1	chr17,-,73953646,73956295	NA	NA	ENST00000301608	ENST00000293217	48	21	41	21	107	41
158884	other	ENSG00000068366	ACSL4	na	17	0	chrX,-,108926600,108939372	NA	NA	ENST00000340800	ENST00000348502	8	0	20	2	0	0
155846	other	ENSG00000130402	ACTN4	na	20	10	chr19,+,39217742,39218955	NA	NA	ENST00000252699	ENST00000440400	0	0	0	0	0	0
157627	other	ENSG00000113812	ACTR8	na	8	0	chr3,-,53907172,53909974	NA	NA	ENST00000335754	ENST00000231909	0	0	0	0	0	0
104054	AFE	ENSG00000160710	ADAR	coding	25	0	chr1,-,154575101,154580467	NA	NA	ENST00000292205	ENST00000368474	0	0	0	0	0	2
142657	AFE	ENSG00000189007	ADAT2	coding	11	0	chr6,-,143759830,143762574	NA	NA	ENST00000237283	ENST00000367594	1	0	0	0	3	0
155823	other	ENSG00000213638	ADAT3	na	16	0	chr19,+,1905437,1914977	NA	NA	ENST00000329478	ENST00000316097	1	0	0	0	0	0
145062	ALE	ENSG00000164742	ADCY1	coding	8	0	chr7,+,45701812,45703887	NA	NA	ENST00000297323	ENST00000432715	0	0	0	0	0	0
107013	AFE	ENSG00000156110	ADK	coding	63	0	chr10,+,75936643,75960521	NA	NA	ENST00000286621	ENST00000372734	16	0	9	0	0	9
129851	AFE	ENSG00000101126	ADNP	coding	207	9	chr20,-,49520537,49545187	NA	NA	ENST00000349014	ENST00000396029	9	0	0	0	0	0
129852	AFE	ENSG00000101126	ADNP	coding	49	0	chr20,-,49520537,49547362	NA	NA	ENST00000349014	ENST00000396032	5	0	4	0	0	0
132214	AFE	ENSG00000100354	ADSL	coding	21	61	chr22,+,40574143,40642018	NA	NA	ENST00000454349	ENST00000335727	0	42	0	18	0	0
119323	AFE	ENSG00000104964	AES	coding	1119	2	chr19,-,3061254,3062171	NA	NA	ENST00000221561	ENST00000327141	142	3	90	0	22	0
138860	AFE	ENSG00000172493	AFF1	coding	18	3	chr4,+,87928575,87967317	NA	NA	ENST00000395146	ENST00000307808	4	7	4	2	0	10
140442	AFE	ENSG00000072364	AFF4	coding	12	2	chr5,-,132272884,132273340	NA	NA	ENST00000265343	ENST00000421773	0	0	1	0	0	5
116715	ALE	ENSG00000183077	AFMID	coding	11	1	chr17,+,76187140,76193226	NA	NA	ENST00000327898	ENST00000409431	0	0	0	0	0	7
122643	AFE	ENSG00000157985	AGAP1	coding	23	0	chr2,+,236403492,236617822	NA	NA	ENST00000409538	ENST00000304032	4	0	1	0	0	0
144435	ALE	ENSG00000133612	AGAP3	coding	88	2	chr7,+,150817231,150819811	NA	NA	ENST00000397238	ENST00000335367	2	0	0	0	0	0
100002	AFE	ENSG00000162688	AGL	coding	38	5	chr1,+,100315970,100316530	NA	NA	ENST00000311030	ENST00000361915	5	0	6	15	11	35
142617	ALE	ENSG00000135541	AHI1	coding	17	2	chr6,-,135709170,135715913	NA	NA	ENST00000457866	ENST00000327035	0	0	0	0	0	0
157756	other	ENSG00000063438	AHRR	na	158	51	chr5,+,304335,306716	NA	NA	ENST00000316418	ENST00000264933	22	35	17	10	12	12
156293	other	ENSG00000173209	AHSA2	na	169	40	chr2,+,61408539,61411846	NA	NA	ENST00000389584	ENST00000357022	17	33	1	9	3	32
141184	ALE	ENSG00000146416	AIG1	coding	124	6	chr6,+,143654581,143660775	NA	NA	ENST00000275235	ENST00000344492	13	7	32	19	98	51
157873	other	ENSG00000146416	AIG1	na	25	0	chr6,+,143382202,143382350	NA	NA	ENST00000275235	ENST00000367596	0	0	0	0	0	0
150902	AFE	ENSG00000106992	AK1	coding	17	0	chr9,-,130635339,130636889	NA	NA	ENST00000223836	ENST00000373156	13	0	11	0	0	0
155509	other	ENSG00000170776	AKAP13	na	8	0	chr15,+,86199017,86201767	NA	NA	ENST00000361243	ENST00000394518	0	0	10	6	0	7
141101	AFE	ENSG00000118507	AKAP7	coding	8	0	chr6,+,131571755,131602669	NA	NA	ENST00000431975	ENST00000342266	0	0	0	0	0	0
119477	AFE	ENSG00000105221	AKT2	coding	17	0	chr19,-,40771257,40774490	NA	NA	ENST00000392038	ENST00000416362	0	0	0	0	0	0
119480	AFE	ENSG00000105221	AKT2	coding	108	3	chr19,-,40771257,40785013	NA	NA	ENST00000392038	ENST00000416994	0	0	0	0	0	0
119482	AFE	ENSG00000105221	AKT2	coding	104	3	chr19,-,40771257,40788123	NA	NA	ENST00000392038	ENST00000423127	0	0	0	0	0	0
140299	ALE	ENSG00000164904	ALDH7A1	coding	65	3	chr5,-,125900283,125903950	NA	NA	ENST00000409134	ENST00000413020	1	0	5	0	4	0
114967	AFE	ENSG00000149925	ALDOA	coding	3127	9	chr16,+,30077247,30078554	NA	NA	ENST00000395248	ENST00000395240	56	0	245	0	18	0
158713	other	ENSG00000119523	ALG2	na	14	0	chr9,-,101981117,101983260	NA	NA	ENST00000238477	ENST00000319033	0	0	0	0	11	0
119372	AFE	ENSG00000181392	ALKBH6	coding	38	4	chr19,-,36504323,36504415	NA	NA	ENST00000455847	ENST00000252984	0	0	0	0	1	0
156512	other	ENSG00000155755	ALS2CR4	na	197	0	chr2,-,202503772,202505615	NA	NA	ENST00000426684	ENST00000448889	22	0	31	0	1	0
100121	AFE	ENSG00000116337	AMPD2	coding	11	0	chr1,+,110162899,110167924	NA	NA	ENST00000393689	ENST00000342115	0	0	0	0	0	0
147371	AFE	ENSG00000078053	AMPH	coding	12	0	chr7,-,38466585,38467437	NA	NA	ENST00000356264	ENST00000421537	3	0	0	0	0	0
157609	other	ENSG00000145020	AMT	na	21	4	chr3,-,49459004,49459414	NA	NA	ENST00000273588	ENST00000399379	0	0	0	0	0	0
108148	AFE	ENSG00000151150	ANK3	coding	40	11	chr10,-,61898844,61900109	NA	NA	ENST00000280772	ENST00000355288	0	0	0	28	1	1
107743	AFE	ENSG00000107890	ANKRD26	coding	10	0	chr10,-,27337907,27339987	NA	NA	ENST00000436985	ENST00000376070	0	0	0	0	0	0
136658	AFE	ENSG00000206560	ANKRD28	coding	48	0	chr3,-,15836812,15900883	NA	NA	ENST00000383777	ENST00000399451	3	0	14	0	6	0
110884	ALE	ENSG00000177119	ANO6	coding	99	9	chr12,+,45816844,45822887	NA	NA	ENST00000425752	ENST00000320560	13	1	50	15	70	9
123888	ALE	ENSG00000169604	ANTXR1	coding	25	0	chr2,+,69351774,69372457	NA	NA	ENST00000303714	ENST00000409829	0	0	0	0	0	0
114498	AFE	ENSG00000182718	ANXA2P1	coding	33	19	chr15,-,60678284,60689456	NA	NA	ENST00000332680	ENST00000421017	0	0	0	0	0	6
157166	other	ENSG00000100280	AP1B1	na	193	0	chr22,-,29755947,29815143	NA	NA	ENST00000357586	ENST00000415447	0	0	0	0	0	0
115891	AFE	ENSG00000166747	AP1G1	coding	40	0	chr16,-,71823384,71842665	NA	NA	ENST00000423132	ENST00000299980	3	0	3	2	6	2
143878	AFE	ENSG00000106367	AP1S1	coding	85	1	chr7,+,100797797,100799874	NA	NA	ENST00000429457	ENST00000337619	1	23	0	2	19	4
153551	ALE	ENSG00000182287	AP1S2	coding	52	91	chrX,-,15845494,15863501	NA	NA	ENST00000421527	ENST00000329235	0	74	0	15	0	0
153556	ALE	ENSG00000182287	AP1S2	coding	68	1	chrX,-,15858713,15863501	NA	NA	ENST00000421527	ENST00000340245	0	0	5	21	0	0
126256	ALE	ENSG00000152056	AP1S3	coding	42	12	chr2,-,224623466,224629929	NA	NA	ENST00000443700	ENST00000334271	0	12	0	0	0	0
114685	AFE	ENSG00000157823	AP3S2	coding	166	31	chr15,-,90432371,90437112	NA	NA	ENST00000398333	ENST00000336418	82	40	28	9	20	0
114686	ALE	ENSG00000157823	AP3S2	coding	10	0	chr15,-,90445034,90446447	NA	NA	ENST00000398333	ENST00000357484	7	0	14	0	0	0
146165	AFE	ENSG00000221838	AP4M1	coding	17	0	chr7,+,99700015,99700297	NA	NA	ENST00000429084	ENST00000422582	4	2	0	0	0	0
139535	AFE	ENSG00000134982	APC	coding	13	0	chr5,+,112073621,112090569	NA	NA	ENST00000457016	ENST00000257430	8	6	2	6	0	0
109949	AFE	ENSG00000149089	APIP	coding	43	10	chr11,-,34916656,34937774	NA	NA	ENST00000395787	ENST00000278359	0	0	0	0	0	0
157057	other	ENSG00000179750	APOBEC3C	na	185	0	chr22,+,39378474,39411599	NA	NA	ENST00000402182	ENST00000396752	0	0	6	0	0	1
157058	other	ENSG00000179750	APOBEC3C	na	15	0	chr22,+,39378474,39418826	NA	NA	ENST00000402182	ENST00000427494	0	0	0	0	2	0
157190	other	ENSG00000128335	APOL2	na	8	0	chr22,-,36629500,36630281	NA	NA	ENST00000451256	ENST00000454728	0	0	0	0	0	0
118634	AFE	ENSG00000076928	ARHGEF1	coding	8	0	chr19,+,42387355,42392134	NA	NA	ENST00000378152	ENST00000316079	0	0	0	0	0	0
104137	AFE	ENSG00000116584	ARHGEF2	coding	31	0	chr1,-,155939090,155948155	NA	NA	ENST00000368315	ENST00000313667	0	0	1	0	0	0
153872	AFE	ENSG00000131089	ARHGEF9	coding	79	12	chrX,-,62944590,63004995	NA	NA	ENST00000253401	ENST00000374878	0	1	4	1	0	0
118325	AFE	ENSG00000105676	ARMC6	coding	45	0	chr19,+,19144738,19153519	NA	NA	ENST00000392336	ENST00000392335	0	0	0	0	3	0
134251	AFE	ENSG00000114098	ARMC8	coding	33	3	chr3,+,137907371,137928658	NA	NA	ENST00000393058	ENST00000358441	35	5	1	0	0	0
111339	AFE	ENSG00000111229	ARPC3	coding	77	17	chr12,-,110883355,110888059	NA	NA	ENST00000392683	ENST00000228825	4	3	3	0	10	6
149295	AFE	ENSG00000104763	ASAH1	coding	18	0	chr8,-,17933095,17941489	NA	NA	ENST00000381733	ENST00000262097	0	0	5	4	1	0
127303	AFE	ENSG00000115239	ASB3	coding	42	0	chr2,-,53992721,54013957	NA	NA	ENST00000394721	ENST00000263634	19	0	0	0	1	2
108227	AFE	ENSG00000138303	ASCC1	coding	63	1	chr10,-,73973088,73975539	NA	NA	ENST00000342444	ENST00000394919	20	0	1	0	4	0
142311	ALE	ENSG00000112249	ASCC3	coding	37	11	chr6,-,101307077,101311939	NA	NA	ENST00000324696	ENST00000324723	0	0	0	0	9	0
148859	AFE	ENSG00000129691	ASH2L	coding	139	12	chr8,+,37963656,37963895	NA	NA	ENST00000343823	ENST00000428278	19	8	0	0	0	0
149434	ALE	ENSG00000198363	ASPH	coding	542	2	chr8,-,62538838,62546241	NA	NA	ENST00000379454	ENST00000356457	87	5	147	0	19	0
126797	AFE	ENSG00000143970	ASXL2	coding	40	0	chr2,-,26068431,26101034	NA	NA	ENST00000398924	ENST00000272341	0	0	11	0	0	0
118540	ALE	ENSG00000167654	ATCAY	coding	82	20	chr19,+,3920795,3924580	NA	NA	ENST00000301260	ENST00000398448	61	11	0	0	0	0
154903	other	ENSG00000107669	ATE1	na	26	11	chr10,-,123629552,123659380	NA	NA	ENST00000369043	ENST00000224652	7	9	7	0	0	5
101671	AFE	ENSG00000162772	ATF3	coding	30	0	chr1,+,212782271,212788359	NA	NA	ENST00000366987	ENST00000341491	0	0	0	0	0	0
142322	AFE	ENSG00000057663	ATG5	coding	101	2	chr6,-,106764140,106773400	NA	NA	ENST00000343245	ENST00000360666	31	10	6	1	9	4
111149	AFE	ENSG00000111676	ATN1	coding	569	15	chr12,+,7037546,7043002	NA	NA	ENST00000356654	ENST00000396684	3	2	0	6	3	1
112052	ALE	ENSG00000068650	ATP11A	coding	10	0	chr13,+,113530254,113532530	NA	NA	ENST00000375630	ENST00000283558	0	0	0	0	0	0
153200	AFE	ENSG00000101974	ATP11C	coding	76	0	chrX,-,138908981,139014174	NA	NA	ENST00000327569	ENST00000370557	5	0	3	0	50	0
157509	other	ENSG00000133657	ATP13A3	na	317	2	chr3,-,194182964,194206522	NA	NA	ENST00000439040	ENST00000457986	8	7	26	11	27	39
117199	ALE	ENSG00000074370	ATP2A3	coding	15	6	chr17,-,3828731,3831956	NA	NA	ENST00000397043	ENST00000397045	0	0	0	0	0	0
134164	AFE	ENSG00000017260	ATP2C1	coding	375	19	chr3,+,130613618,130649259	NA	NA	ENST00000347421	ENST00000328560	192	354	27	19	21	36
157255	other	ENSG00000017260	ATP2C1	na	63	19	chr3,+,130720157,130734995	NA	NA	ENST00000347421	ENST00000422190	1	29	12	0	0	0
130019	ALE	ENSG00000124172	ATP5E	coding	36	58	chr20,-,57603895,57605357	NA	NA	ENST00000395663	ENST00000243997	18	335	80	623	6	324
130704	AFE	ENSG00000154723	ATP5J	coding	33	2	chr21,-,27102111,27106643	NA	NA	ENST00000400099	ENST00000400094	0	1	6	0	0	0
130702	ALE	ENSG00000154723	ATP5J	coding	161	0	chr21,-,27096987,27097536	NA	NA	ENST00000400099	ENST00000284971	25	0	32	0	5	0
148456	AFE	ENSG00000106246	ATP5J2	coding	17	0	chr7,-,99032890,99036314	NA	NA	ENST00000422429	ENST00000292478	0	1	1	0	0	0
148466	AFE	ENSG00000106246	ATP5J2	coding	27	3	chr7,-,99057815,99063733	NA	NA	ENST00000422429	ENST00000292475	4	0	2	9	0	1
148467	AFE	ENSG00000106246	ATP5J2	coding	252	2	chr7,-,99057815,99063751	NA	NA	ENST00000422429	ENST00000394186	31	2	58	7	16	0
148463	ALE	ENSG00000106246	ATP5J2	coding	108	0	chr7,-,99055977,99057708	NA	NA	ENST00000422429	ENST00000359832	0	0	0	0	3	0
158535	other	ENSG00000106246	ATP5J2	na	1790	27	chr7,-,99056885,99057708	NA	NA	ENST00000422429	ENST00000292475	617	8	1072	7	80	0
113078	AFE	ENSG00000125375	ATP5S	coding	107	91	chr14,+,50788311,50789228	NA	NA	ENST00000358473	ENST00000245448	1	25	7	13	0	14
119500	AFE	ENSG00000105341	ATP5SL	coding	11	0	chr19,-,41944318,41945786	NA	NA	ENST00000417807	ENST00000221943	0	0	2	0	0	0
149424	AFE	ENSG00000047249	ATP6V1H	coding	27	2	chr8,-,54754284,54755430	NA	NA	ENST00000359530	ENST00000396774	0	0	0	0	4	0
157730	other	ENSG00000124406	ATP8A1	na	17	0	chr4,-,42590345,42596305	NA	NA	ENST00000381668	ENST00000264449	22	38	0	0	0	1
100695	AFE	ENSG00000143515	ATP8B2	coding	16	0	chr1,+,154298177,154300580	NA	NA	ENST00000368489	ENST00000368487	0	0	0	0	1	0
128650	ALE	ENSG00000088812	ATRN	coding	30	5	chr20,+,3584908,3596474	NA	NA	ENST00000262919	ENST00000446916	0	0	0	1	0	0
106225	ALE	ENSG00000107518	ATRNL1	coding	9	0	chr10,+,117309045,117357102	NA	NA	ENST00000355044	ENST00000303745	0	0	0	0	0	0
157080	other	ENSG00000130638	ATXN10	na	123	15	chr22,+,46125469,46134610	NA	NA	ENST00000396011	ENST00000252934	32	2	18	21	13	0
155564	other	ENSG00000168488	ATXN2L	na	116	9	chr16,+,28847442,28848048	NA	NA	ENST00000395547	ENST00000340394	0	0	0	0	0	0
151610	ALE	ENSG00000148090	AUH	coding	13	0	chr9,-,94057078,94058302	NA	NA	ENST00000375731	ENST00000422391	0	0	0	0	7	0
127932	ALE	ENSG00000115307	AUP1	coding	45	10	chr2,-,74754247,74754374	NA	NA	ENST00000258081	ENST00000412627	14	6	0	7	0	5
137399	ALE	ENSG00000163512	AZI2	coding	107	11	chr3,-,28373440,28373859	NA	NA	ENST00000295748	ENST00000334100	0	3	14	3	0	0
137400	ALE	ENSG00000163512	AZI2	coding	74	0	chr3,-,28373444,28373859	NA	NA	ENST00000295748	ENST00000420543	0	0	0	0	0	0
130184	AFE	ENSG00000156273	BACH1	coding	13	1	chr21,+,30671918,30693541	NA	NA	ENST00000286800	ENST00000399921	0	0	0	0	0	0
130187	AFE	ENSG00000156273	BACH1	coding	14	0	chr21,+,30677642,30693541	NA	NA	ENST00000286800	ENST00000382845	0	0	0	0	0	1
155425	other	ENSG00000166170	BAG5	na	11	0	chr14,-,104027528,104028952	NA	NA	ENST00000337322	ENST00000299204	8	0	3	2	4	0
119627	AFE	ENSG00000105327	BBC3	coding	14	0	chr19,-,47731702,47734185	NA	NA	ENST00000449228	ENST00000359924	0	0	0	0	0	0
133889	AFE	ENSG00000114439	BBX	coding	8	1	chr3,+,107243040,107245173	NA	NA	ENST00000325805	ENST00000431630	6	0	0	0	0	0
143950	ALE	ENSG00000075790	BCAP29	coding	25	1	chr7,+,107253876,107262074	NA	NA	ENST00000379117	ENST00000379119	0	0	1	0	6	0
153361	AFE	ENSG00000185825	BCAP31	coding	525	4	chrX,-,152988742,152989788	NA	NA	ENST00000458587	ENST00000345046	20	1	8	0	15	1
106001	AFE	ENSG00000137936	BCAR3	coding	9	2	chr1,-,94140496,94147153	NA	NA	ENST00000370244	ENST00000260502	2	0	1	3	0	0
106375	ALE	ENSG00000107949	BCCIP	coding	312	30	chr10,+,127522514,127524672	NA	NA	ENST00000368759	ENST00000278100	0	3	0	8	11	10
118598	AFE	ENSG00000142046	BCKDHA	coding	117	0	chr19,+,41903839,41916541	NA	NA	ENST00000428942	ENST00000269980	0	0	2	0	0	0
155854	other	ENSG00000142046	BCKDHA	na	20	5	chr19,+,41884423,41888676	NA	NA	ENST00000428942	ENST00000342187	0	0	0	0	2	5
115011	AFE	ENSG00000103507	BCKDK	coding	11	0	chr16,+,31119799,31120367	NA	NA	ENST00000394951	ENST00000219794	0	1	0	0	0	0
136992	AFE	ENSG00000113916	BCL6	coding	13	1	chr3,-,187452694,187453877	NA	NA	ENST00000406870	ENST00000232014	0	0	0	0	1	0
155115	other	ENSG00000176697	BDNF	na	10	0	chr11,-,27680131,27721710	NA	NA	ENST00000438929	ENST00000356660	0	0	3	0	1	0
142326	AFE	ENSG00000178409	BEND3	coding	13	0	chr6,-,107420499,107427280	NA	NA	ENST00000369042	ENST00000339644	0	0	0	0	0	0
107570	ALE	ENSG00000165626	BEND7	coding	14	0	chr10,-,13483749,13489265	NA	NA	ENST00000396900	ENST00000378605	0	0	7	0	0	1
148362	AFE	ENSG00000105829	BET1	coding	68	32	chr7,-,93628605,93633509	NA	NA	ENST00000457139	ENST00000222547	4	7	0	13	0	17
109787	ALE	ENSG00000177951	BET1L	coding	95	3	chr11,-,205468,205610	NA	NA	ENST00000410108	ENST00000332865	6	1	16	8	9	0
100810	ALE	ENSG00000160783	BGLAP	coding	140	8	chr1,+,156206273,156209338	NA	NA	ENST00000368276	ENST00000368273	1	1	1	0	0	1
155218	other	ENSG00000151746	BICD1	na	28	1	chr12,+,32490639,32520603	NA	NA	ENST00000281474	ENST00000395758	0	0	0	0	0	0
132538	AFE	ENSG00000015475	BID	coding	8	0	chr22,-,18232939,18257146	NA	NA	ENST00000317361	ENST00000337587	0	0	0	0	0	0
116733	ALE	ENSG00000089685	BIRC5	coding	8	0	chr17,+,76212861,76218908	NA	NA	ENST00000301633	ENST00000432014	0	0	0	0	0	0
156836	other	ENSG00000166619	BLCAP	na	13	0	chr20,-,36149810,36156194	NA	NA	ENST00000414542	ENST00000445723	0	0	0	0	0	0
117323	AFE	ENSG00000012048	BRCA1	coding	9	0	chr17,-,41276131,41276753	NA	NA	ENST00000357654	ENST00000393691	5	0	0	0	0	0
119227	ALE	ENSG00000141867	BRD4	coding	131	15	chr19,-,15360100,15364962	NA	NA	ENST00000263377	ENST00000371835	0	12	29	22	5	1
140465	ALE	ENSG00000112983	BRD8	coding	135	16	chr5,-,137492955,137495243	NA	NA	ENST00000254900	ENST00000230901	6	15	6	22	1	1
140866	AFE	ENSG00000028310	BRD9	coding	38	1	chr5,-,891968,892720	NA	NA	ENST00000433367	ENST00000323510	0	0	0	0	0	0
156256	other	ENSG00000158019	BRE	na	11	3	chr2,+,28521357,28532948	NA	NA	ENST00000344773	ENST00000361704	0	0	6	0	0	0
108736	AFE	ENSG00000174672	BRSK2	coding	14	0	chr11,+,1411604,1457269	NA	NA	ENST00000382179	ENST00000308219	1	4	0	0	0	0
110124	AFE	ENSG00000168000	BSCL2	coding	71	0	chr11,-,62473088,62473674	NA	NA	ENST00000433053	ENST00000278893	0	0	1	0	1	0
110126	AFE	ENSG00000168000	BSCL2	coding	13	0	chr11,-,62473088,62473730	NA	NA	ENST00000433053	ENST00000421906	0	0	0	0	0	0
113727	ALE	ENSG00000011114	BTBD7	coding	13	5	chr14,-,93755052,93760203	NA	NA	ENST00000334746	ENST00000298896	0	0	0	0	4	11
121506	AFE	ENSG00000082153	BZW1	coding	54	7	chr2,+,201676449,201677930	NA	NA	ENST00000452790	ENST00000410110	0	0	4	0	7	0
121516	AFE	ENSG00000082153	BZW1	coding	133	7	chr2,+,201676712,201677930	NA	NA	ENST00000452790	ENST00000353957	16	11	10	2	14	3
106963	AFE	ENSG00000171224	C10orf35	coding	17	0	chr10,+,71390068,71391235	NA	NA	ENST00000395055	ENST00000373279	0	0	0	0	0	0
107093	AFE	ENSG00000122378	C10orf58	coding	84	0	chr10,+,82168398,82180221	NA	NA	ENST00000372188	ENST00000372187	1	0	0	0	2	0
111681	ALE	ENSG00000139620	C12orf41	coding	56	4	chr12,-,49056436,49061475	NA	NA	ENST00000420613	ENST00000357861	4	1	5	0	6	0
110833	AFE	ENSG00000139160	C12orf72	coding	15	0	chr12,+,31812295,31814774	NA	NA	ENST00000412352	ENST00000395763	0	0	0	0	0	0
113301	AFE	ENSG00000133943	C14orf159	coding	8	2	chr14,+,91614201,91623982	NA	NA	ENST00000256324	ENST00000412671	14	0	25	12	2	13
155417	other	ENSG00000119650	C14orf179	na	14	0	chr14,+,76488736,76524984	NA	NA	ENST00000238628	ENST00000314067	0	0	1	0	0	0
155418	other	ENSG00000119650	C14orf179	na	173	8	chr14,+,76525715,76548637	NA	NA	ENST00000238628	ENST00000314067	6	0	5	0	1	0
114614	ALE	ENSG00000178761	C15orf17	coding	64	9	chr15,-,75197399,75197494	NA	NA	ENST00000357635	ENST00000457294	0	8	0	0	0	0
114111	AFE	ENSG00000167173	C15orf39	coding	31	0	chr15,+,75494399,75498339	NA	NA	ENST00000360639	ENST00000394987	0	0	3	0	0	0
117990	ALE	ENSG00000134490	C18orf45	coding	13	0	chr18,-,20956904,20957609	NA	NA	ENST00000383233	ENST00000399707	2	0	0	0	0	0
119332	ALE	ENSG00000161091	C19orf28	coding	35	0	chr19,-,3544729,3544806	NA	NA	ENST00000398558	ENST00000355415	0	0	0	0	0	0
119253	ALE	ENSG00000214046	C19orf42	coding	45	69	chr19,-,16758071,16764845	NA	NA	ENST00000358726	ENST00000397349	0	124	0	114	0	134
155927	other	ENSG00000188493	C19orf54	na	902	0	chr19,-,41249885,41250463	NA	NA	ENST00000378313	ENST00000392019	0	0	5	0	1	0
127553	AFE	ENSG00000197223	C1D	coding	40	0	chr2,-,68274450,68290089	NA	NA	ENST00000407324	ENST00000355848	23	0	6	0	8	0
105405	ALE	ENSG00000116885	C1orf102	coding	9	1	chr1,-,36894075,36897402	NA	NA	ENST00000356637	ENST00000354267	0	0	0	0	0	0
105417	ALE	ENSG00000163875	C1orf149	coding	58	0	chr1,-,37959414,37967404	NA	NA	ENST00000373075	ENST00000373073	0	0	0	0	0	0
154627	other	ENSG00000171806	C1orf156	na	35	1	chr1,-,169763037,169763955	NA	NA	ENST00000303469	ENST00000310392	6	0	0	0	4	7
100818	AFE	ENSG00000163467	C1orf182	coding	22	0	chr1,+,156308395,156309424	NA	NA	ENST00000368255	ENST00000368254	0	0	0	0	0	0
105366	AFE	ENSG00000163866	C1orf212	coding	36	1	chr1,-,35321582,35325277	NA	NA	ENST00000446026	ENST00000426886	3	0	7	0	3	0
101929	ALE	ENSG00000135778	C1orf57	coding	741	97	chr1,+,233105863,233113908	NA	NA	ENST00000366627	ENST00000366628	28	45	18	15	13	11
102353	AFE	ENSG00000142698	C1orf94	coding	10	0	chr1,+,34632771,34662825	NA	NA	ENST00000398041	ENST00000373374	0	0	0	0	0	0
101664	ALE	ENSG00000153363	C1orf97	coding	26	0	chr1,+,211570172,211599552	NA	NA	ENST00000367003	ENST00000423222	0	0	0	0	2	0
104615	AFE	ENSG00000203721	C1orf98	coding	17	3	chr1,-,200342296,200343142	NA	NA	ENST00000367355	ENST00000367356	4	0	0	0	0	0
111156	AFE	ENSG00000182326	C1S	coding	11	0	chr12,+,7168180,7169142	NA	NA	ENST00000406697	ENST00000360817	0	0	0	4	26	12
129054	AFE	ENSG00000196227	C20orf177	coding	14	0	chr20,+,58515589,58517252	NA	NA	ENST00000358293	ENST00000360816	17	3	1	0	0	0
129041	ALE	ENSG00000171984	C20orf196	coding	37	0	chr20,+,5753688,5753777	NA	NA	ENST00000303142	ENST00000378979	14	0	0	0	0	0
129887	AFE	ENSG00000089063	C20orf30	coding	33	14	chr20,-,5090090,5093375	NA	NA	ENST00000342308	ENST00000379299	3	5	7	3	0	1
128622	ALE	ENSG00000131043	C20orf4	coding	212	22	chr20,+,34832847,34843499	NA	NA	ENST00000397286	ENST00000320849	5	0	4	3	0	0
130771	ALE	ENSG00000159079	C21orf59	coding	575	172	chr21,-,33974282,33974581	NA	NA	ENST00000431216	ENST00000290155	37	59	8	10	7	20
130789	ALE	ENSG00000159086	C21orf66	coding	28	2	chr21,-,34113932,34115558	NA	NA	ENST00000331923	ENST00000290178	1	5	0	0	0	0
131030	ALE	ENSG00000184809	C21orf88	coding	26	2	chr21,-,40978273,40981509	NA	NA	ENST00000380612	ENST00000329618	0	0	0	0	0	0
124300	AFE	ENSG00000185414	C2orf15	coding	224	14	chr2,+,99797711,99802639	NA	NA	ENST00000424491	ENST00000308656	23	6	17	7	1	10
124322	ALE	ENSG00000185414	C2orf15	coding	26	0	chr2,+,99812218,99813616	NA	NA	ENST00000424491	ENST00000308656	0	0	0	0	0	0
123592	ALE	ENSG00000143919	C2orf34	coding	11	0	chr2,+,44617443,44619023	NA	NA	ENST00000378494	ENST00000428929	0	0	0	0	0	0
123597	ALE	ENSG00000143919	C2orf34	coding	9	0	chr2,+,44617443,44776693	NA	NA	ENST00000378494	ENST00000402247	0	0	0	0	0	0
135455	AFE	ENSG00000179152	C3orf23	coding	9	1	chr3,+,44380325,44396230	NA	NA	ENST00000417237	ENST00000342649	0	4	0	3	0	12
135456	ALE	ENSG00000179152	C3orf23	coding	18	2	chr3,+,44399367,44399708	NA	NA	ENST00000417237	ENST00000383746	0	6	0	0	7	0
134152	AFE	ENSG00000183624	C3orf37	coding	14	4	chr3,+,128998053,128998552	NA	NA	ENST00000383463	ENST00000389735	2	0	0	4	0	1
138271	AFE	ENSG00000163689	C3orf67	coding	11	9	chr3,-,58899589,58923373	NA	NA	ENST00000383713	ENST00000295966	0	0	0	0	0	0
137776	AFE	ENSG00000163832	C3orf75	coding	12	0	chr3,-,47552715,47554810	NA	NA	ENST00000296149	ENST00000439305	4	0	5	0	7	0
157707	other	ENSG00000164125	C4orf18	na	32	0	chr4,-,159076976,159091617	NA	NA	ENST00000393807	ENST00000296530	57	17	107	30	11	1
138515	AFE	ENSG00000151470	C4orf33	coding	19	6	chr4,+,130017363,130023756	NA	NA	ENST00000281146	ENST00000425929	0	0	0	0	0	0
138645	AFE	ENSG00000185818	C4orf48	coding	12	0	chr4,+,2044210,2044462	NA	NA	ENST00000423729	ENST00000382878	0	0	0	0	0	0
138648	ALE	ENSG00000185818	C4orf48	coding	13	0	chr4,+,2044550,2045587	NA	NA	ENST00000423729	ENST00000382878	0	0	0	0	0	0
140255	AFE	ENSG00000134986	C5orf13	coding	77	36	chr5,-,111071203,111091466	NA	NA	ENST00000453526	ENST00000450761	10	27	2	0	2	4
139914	AFE	ENSG00000164463	C5orf41	coding	54	2	chr5,+,172507786,172513503	NA	NA	ENST00000393776	ENST00000296953	40	5	18	0	6	0
142157	ALE	ENSG00000197261	C6orf141	coding	24	11	chr6,+,49522869,49528246	NA	NA	ENST00000371194	ENST00000414696	0	0	0	0	0	0
157942	other	ENSG00000197261	C6orf141	na	16	4	chr6,+,49519387,49519593	NA	NA	ENST00000371194	ENST00000415078	0	0	0	0	0	0
140922	AFE	ENSG00000130349	C6orf203	coding	25	0	chr6,+,107349474,107360952	NA	NA	ENST00000443043	ENST00000311381	0	0	1	0	0	0
158068	other	ENSG00000112167	C6orf64	na	10	0	chr6,-,39073551,39077089	NA	NA	ENST00000229903	ENST00000373249	0	0	0	0	0	0
145317	AFE	ENSG00000106609	C7orf42	coding	8	2	chr7,+,66395854,66406834	NA	NA	ENST00000341567	ENST00000418375	0	0	0	0	0	0
147412	ALE	ENSG00000106603	C7orf44	coding	26	1	chr7,-,43673006,43679047	NA	NA	ENST00000415076	ENST00000438444	22	0	3	0	5	0
158579	other	ENSG00000156170	C8orf38	na	9	0	chr8,+,96046349,96047681	NA	NA	ENST00000396124	ENST00000286687	6	0	4	0	9	3
148904	AFE	ENSG00000176209	C8orf40	coding	37	0	chr8,+,42396847,42401611	NA	NA	ENST00000438528	ENST00000319946	6	0	4	0	13	0
148905	AFE	ENSG00000176209	C8orf40	coding	57	9	chr8,+,42397297,42401611	NA	NA	ENST00000438528	ENST00000416469	19	4	6	37	13	21
148906	AFE	ENSG00000176209	C8orf40	coding	28	2	chr8,+,42397515,42401611	NA	NA	ENST00000438528	ENST00000417410	4	13	1	7	2	2
158715	other	ENSG00000165152	C9orf125	na	8	0	chr9,-,104239450,104249230	NA	NA	ENST00000374851	ENST00000374848	17	2	11	3	0	0
151685	ALE	ENSG00000175611	C9orf130	coding	20	0	chr9,-,98632722,98637261	NA	NA	ENST00000429781	ENST00000427259	3	1	0	0	0	0
150537	ALE	ENSG00000155621	C9orf85	coding	68	1	chr9,+,74586533,74587607	NA	NA	ENST00000377031	ENST00000334731	19	10	10	1	0	6
150194	ALE	ENSG00000196642	C9orf86	coding	18	0	chr9,+,139726821,139728171	NA	NA	ENST00000371663	ENST00000371671	0	0	0	0	0	0
117429	AFE	ENSG00000154975	CA10	coding	23	0	chr17,-,50149752,50235085	NA	NA	ENST00000340813	ENST00000285273	21	0	0	0	0	0
152408	ALE	ENSG00000186312	CA5BP	coding	9	6	chrX,+,15711180,15715362	NA	NA	ENST00000432029	ENST00000380331	9	11	0	0	0	0
101843	AFE	ENSG00000163050	CABC1	coding	17	0	chr1,+,227128099,227149077	NA	NA	ENST00000366779	ENST00000366775	0	0	0	0	0	0
131546	AFE	ENSG00000099991	CABIN1	coding	28	0	chr22,+,24408177,24431891	NA	NA	ENST00000263119	ENST00000398319	0	0	0	0	2	0
144289	AFE	ENSG00000122786	CALD1	coding	115	2	chr7,+,134576423,134613504	NA	NA	ENST00000361675	ENST00000393118	0	0	0	0	6	0
113295	AFE	ENSG00000198668	CALM1	coding	596	4	chr14,+,90863576,90866408	NA	NA	ENST00000447653	ENST00000356978	259	4	31	3	19	0
144201	AFE	ENSG00000128595	CALU	coding	214	7	chr7,+,128379485,128388626	NA	NA	ENST00000342367	ENST00000249364	7	0	11	1	3	0
158148	other	ENSG00000128595	CALU	na	87	1	chr7,+,128388857,128394582	NA	NA	ENST00000342367	ENST00000449187	5	0	0	0	5	8
158456	other	ENSG00000058404	CAMK2B	na	14	0	chr7,-,44274277,44280305	NA	NA	ENST00000258682	ENST00000353625	16	0	0	0	0	0
139953	AFE	ENSG00000127022	CANX	coding	15	0	chr5,+,179126049,179132679	NA	NA	ENST00000415618	ENST00000376953	0	0	0	0	4	0
139954	AFE	ENSG00000127022	CANX	coding	236	8	chr5,+,179126102,179132679	NA	NA	ENST00000415618	ENST00000247461	35	3	26	1	16	3
128010	AFE	ENSG00000042493	CAPG	coding	232	0	chr2,-,85629280,85641106	NA	NA	ENST00000263867	ENST00000409724	0	0	0	0	0	0
155049	other	ENSG00000014216	CAPN1	na	10	0	chr11,+,64950438,64950945	NA	NA	ENST00000279247	ENST00000259755	0	0	0	0	0	0
154356	other	ENSG00000162909	CAPN2	na	10	0	chr1,+,223943350,223945070	NA	NA	ENST00000366869	ENST00000295006	0	0	0	0	0	0
111888	ALE	ENSG00000180881	CAPS2	coding	9	1	chr12,-,75672844,75676030	NA	NA	ENST00000409445	ENST00000328705	15	8	17	6	0	0
104601	AFE	ENSG00000077549	CAPZB	coding	858	1	chr1,-,19746243,19811929	NA	NA	ENST00000375145	ENST00000264202	15	0	11	0	7	0
115957	AFE	ENSG00000153048	CARHSP1	coding	16	3	chr16,-,8953191,8961905	NA	NA	ENST00000311052	ENST00000396593	0	3	0	0	0	4
112012	AFE	ENSG00000213995	CARKD	coding	60	0	chr13,+,111267993,111274562	NA	NA	ENST00000309957	ENST00000397191	69	17	19	0	5	0
140230	AFE	ENSG00000153113	CAST	coding	11	4	chr5,+,96038618,96058342	NA	NA	ENST00000395813	ENST00000309190	4	3	14	69	1	28
128507	AFE	ENSG00000078699	CBFA2T2	coding	24	0	chr20,+,32078106,32194761	NA	NA	ENST00000359606	ENST00000342704	0	0	0	0	1	0
139134	ALE	ENSG00000145439	CBR4	coding	26	0	chr4,-,169815915,169923221	NA	NA	ENST00000306193	ENST00000419710	0	0	0	0	11	0
156029	other	ENSG00000136682	CBWD2	na	8	0	chr2,+,114222749,114224059	NA	NA	ENST00000259199	ENST00000426479	0	0	0	0	0	0
117378	AFE	ENSG00000108468	CBX1	coding	28	0	chr17,-,46154402,46178116	NA	NA	ENST00000442683	ENST00000393408	1	0	0	0	0	0
144715	AFE	ENSG00000122565	CBX3	coding	368	25	chr7,+,26241445,26242590	NA	NA	ENST00000337620	ENST00000396386	7	3	22	6	15	3
144716	AFE	ENSG00000122565	CBX3	coding	355	3	chr7,+,26242228,26242590	NA	NA	ENST00000337620	ENST00000456948	0	0	0	0	0	0
111753	AFE	ENSG00000094916	CBX5	coding	52	4	chr12,-,54651475,54653053	NA	NA	ENST00000209875	ENST00000439541	0	0	0	0	0	0
111754	AFE	ENSG00000094916	CBX5	coding	59	0	chr12,-,54651475,54653292	NA	NA	ENST00000209875	ENST00000454593	0	0	5	0	0	0
105914	ALE	ENSG00000137944	CCBL2	coding	9	2	chr1,-,89449748,89453934	NA	NA	ENST00000260508	ENST00000413769	0	10	0	0	0	0
105916	ALE	ENSG00000137944	CCBL2	coding	105	0	chr1,-,89435149,89458267	NA	NA	ENST00000321792	ENST00000370491	19	0	4	0	5	0
112567	ALE	ENSG00000151773	CCDC122	coding	22	1	chr13,-,44411564,44432916	NA	NA	ENST00000281508	ENST00000379193	0	0	0	0	0	0
136463	AFE	ENSG00000175455	CCDC14	coding	40	9	chr3,-,123667978,123668230	NA	NA	ENST00000409697	ENST00000426152	0	0	0	0	0	0
139312	AFE	ENSG00000181982	CCDC149	coding	9	0	chr4,-,24878318,24914438	NA	NA	ENST00000428116	ENST00000382116	0	0	0	0	0	0
137870	AFE	ENSG00000164051	CCDC51	coding	23	0	chr3,-,48476545,48481397	NA	NA	ENST00000395696	ENST00000395694	0	0	0	0	0	0
155772	other	ENSG00000176155	CCDC57	na	12	0	chr17,-,80086472,80091948	NA	NA	ENST00000445854	ENST00000324808	3	0	0	0	2	0
135916	ALE	ENSG00000180376	CCDC66	coding	29	2	chr3,+,56601080,56603340	NA	NA	ENST00000394672	ENST00000434467	0	0	0	0	0	0
145059	AFE	ENSG00000136280	CCM2	coding	63	0	chr7,+,45039961,45077851	NA	NA	ENST00000381112	ENST00000258781	25	0	5	2	20	1
113409	AFE	ENSG00000100814	CCNB1IP1	coding	245	0	chr14,-,20797531,20801412	NA	NA	ENST00000398160	ENST00000358932	27	0	31	0	21	1
138836	ALE	ENSG00000138764	CCNG2	coding	17	10	chr4,+,78085631,78086953	NA	NA	ENST00000354403	ENST00000316355	7	6	0	0	0	0
155424	other	ENSG00000090061	CCNK	na	624	15	chr14,+,99969320,99969947	NA	NA	ENST00000437596	ENST00000380246	0	0	0	0	0	0
136648	ALE	ENSG00000163660	CCNL1	coding	71	6	chr3,-,156874871,156876654	NA	NA	ENST00000295926	ENST00000295925	0	3	0	0	13	7
103617	ALE	ENSG00000221978	CCNL2	coding	171	2	chr1,-,1328182,1328775	NA	NA	ENST00000400809	ENST00000408918	15	8	2	4	6	1
125052	ALE	ENSG00000054219	CD302	coding	22	0	chr2,-,160661732,160663483	NA	NA	ENST00000409803	ENST00000263636	5	5	0	0	8	2
108913	AFE	ENSG00000110651	CD81	coding	263	20	chr11,+,2398844,2411641	NA	NA	ENST00000381036	ENST00000263645	5	11	19	11	19	4
152471	AFE	ENSG00000002586	CD99	coding	9	0	chrX,+,2609467,2632462	NA	NA	ENST00000449611	ENST00000381184	0	0	0	0	6	0
153244	ALE	ENSG00000102181	CD99L2	coding	14	0	chrX,-,149998076,149999703	NA	NA	ENST00000438086	ENST00000320893	0	0	0	0	0	0
158900	other	ENSG00000102181	CD99L2	na	26	3	chrX,-,149983408,149984479	NA	NA	ENST00000438086	ENST00000355330	12	6	0	7	3	0
151699	AFE	ENSG00000081377	CDC14B	coding	14	2	chr9,-,99327764,99329049	NA	NA	ENST00000375241	ENST00000375242	0	1	1	1	0	1
151697	ALE	ENSG00000081377	CDC14B	coding	74	5	chr9,-,99278073,99284787	NA	NA	ENST00000375241	ENST00000375236	52	55	0	16	14	24
106893	AFE	ENSG00000170312	CDC2	coding	13	4	chr10,+,62538425,62539898	NA	NA	ENST00000373811	ENST00000448257	0	0	0	0	0	0
154602	other	ENSG00000008128	CDC2L1	na	69	0	chr1,-,1575812,1639618	NA	NA	ENST00000340677	ENST00000317673	0	0	0	0	0	0
129060	ALE	ENSG00000124215	CDH26	coding	25	0	chr20,+,58581841,58587581	NA	NA	ENST00000244047	ENST00000244048	0	0	0	0	0	0
113558	ALE	ENSG00000100490	CDKL1	coding	15	3	chr14,-,50801338,50805664	NA	NA	ENST00000356146	ENST00000216378	35	47	0	3	0	4
155447	other	ENSG00000100490	CDKL1	na	9	4	chr14,-,50808939,50811703	NA	NA	ENST00000356146	ENST00000216378	14	19	1	0	13	0
155448	other	ENSG00000100490	CDKL1	na	10	9	chr14,-,50811775,50825745	NA	NA	ENST00000356146	ENST00000216378	5	0	0	0	0	0
155209	other	ENSG00000111276	CDKN1B	na	799	61	chr12,+,12871247,12871758	NA	NA	ENST00000396340	ENST00000228872	183	101	57	25	15	13
150307	AFE	ENSG00000099810	CDKN2BAS	coding	49	39	chr9,+,21802779,21815431	NA	NA	ENST00000443256	ENST00000355696	3	0	0	11	4	7
116863	ALE	ENSG00000175106	CDRT4	coding	8	0	chr17,-,15343598,15449098	NA	NA	ENST00000225576	ENST00000395924	0	0	0	0	0	0
132519	AFE	ENSG00000093072	CECR1	coding	382	3	chr22,-,17672699,17680438	NA	NA	ENST00000399839	ENST00000330232	0	1	10	3	0	0
133761	ALE	ENSG00000075275	CELSR1	coding	16	1	chr22,-,46759083,46759892	NA	NA	ENST00000395967	ENST00000262738	0	0	0	0	0	0
157686	other	ENSG00000138778	CENPE	na	24	0	chr4,-,104059608,104061412	NA	NA	ENST00000265148	ENST00000380026	0	0	0	0	0	0
115358	ALE	ENSG00000166451	CENPN	coding	33	16	chr16,+,81053880,81056359	NA	NA	ENST00000393335	ENST00000299572	0	5	0	0	0	0
115361	ALE	ENSG00000166451	CENPN	coding	46	16	chr16,+,81061901,81062173	NA	NA	ENST00000393335	ENST00000305850	0	0	0	4	0	4
149682	AFE	ENSG00000119397	CEP110	coding	19	1	chr9,+,123884228,123886208	NA	NA	ENST00000373855	ENST00000373847	0	12	0	0	0	2
149683	ALE	ENSG00000119397	CEP110	coding	9	0	chr9,+,123922579,123923560	NA	NA	ENST00000373855	ENST00000373844	0	0	0	0	0	0
128543	AFE	ENSG00000126001	CEP250	coding	10	0	chr20,+,34043062,34046124	NA	NA	ENST00000397527	ENST00000446710	0	0	0	0	0	0
134186	AFE	ENSG00000182923	CEP63	coding	45	2	chr3,+,134204893,134214137	NA	NA	ENST00000337090	ENST00000332047	3	0	0	0	1	0
100166	AFE	ENSG00000134255	CEPT1	coding	49	3	chr1,+,111682928,111690263	NA	NA	ENST00000317584	ENST00000357172	14	1	0	0	3	1
121566	ALE	ENSG00000003402	CFLAR	coding	10	0	chr2,+,202000829,202000920	NA	NA	ENST00000309955	ENST00000325671	0	0	0	0	0	0
121568	ALE	ENSG00000003402	CFLAR	coding	23	0	chr2,+,202005161,202006096	NA	NA	ENST00000309955	ENST00000341222	0	0	0	0	0	0
113454	AFE	ENSG00000100888	CHD8	coding	9	0	chr14,-,21897493,21899969	NA	NA	ENST00000399982	ENST00000430710	0	0	0	0	0	0
108693	AFE	ENSG00000149554	CHEK1	coding	11	1	chr11,+,125496469,125496643	NA	NA	ENST00000427383	ENST00000278916	0	0	0	0	0	0
110471	AFE	ENSG00000177830	CHID1	coding	110	0	chr11,-,904858,908541	NA	NA	ENST00000323541	ENST00000336845	0	0	0	1	3	0
125254	AFE	ENSG00000128656	CHN1	coding	22	5	chr2,-,175711684,175712040	NA	NA	ENST00000409900	ENST00000409089	3	18	0	0	0	0
107523	AFE	ENSG00000182022	CHST15	coding	8	0	chr10,-,125806239,125852984	NA	NA	ENST00000346248	ENST00000421115	0	0	0	0	0	0
155601	other	ENSG00000127586	CHTF18	na	13	1	chr16,+,843273,844053	NA	NA	ENST00000317063	ENST00000262315	0	0	0	0	0	0
115851	AFE	ENSG00000168802	CHTF8	coding	49	1	chr16,-,69155395,69165991	NA	NA	ENST00000306585	ENST00000398235	0	0	0	0	0	0
113163	AFE	ENSG00000125954	CHURC1	coding	19	12	chr14,+,65453814,65470966	NA	NA	ENST00000448390	ENST00000246166	8	18	3	10	0	15
113162	ALE	ENSG00000125954	CHURC1	coding	365	206	chr14,+,65392797,65398855	NA	NA	ENST00000448390	ENST00000359118	85	362	47	307	0	74
150925	AFE	ENSG00000148337	CIZ1	coding	53	0	chr9,-,130953140,130953710	NA	NA	ENST00000393608	ENST00000325669	0	0	0	0	0	0
156418	other	ENSG00000074054	CLASP1	na	31	3	chr2,-,122159247,122161943	NA	NA	ENST00000263710	ENST00000376194	3	0	0	0	0	0
154490	other	ENSG00000121940	CLCC1	na	11	0	chr1,-,109505090,109505982	NA	NA	ENST00000369971	ENST00000369976	18	0	5	3	13	0
139357	AFE	ENSG00000134852	CLOCK	coding	28	0	chr4,-,56376231,56412648	NA	NA	ENST00000309964	ENST00000435527	16	0	0	0	0	0
105393	ALE	ENSG00000092853	CLSPN	coding	14	3	chr1,-,36186580,36202514	NA	NA	ENST00000318121	ENST00000251195	0	0	0	0	0	0
134997	AFE	ENSG00000187118	CMC1	coding	30	0	chr3,+,28283302,28304781	NA	NA	ENST00000418849	ENST00000396610	0	0	7	1	0	0
135049	ALE	ENSG00000153551	CMTM7	coding	55	29	chr3,+,32493964,32495732	NA	NA	ENST00000396546	ENST00000334983	0	0	0	2	0	5
152447	ALE	ENSG00000149970	CNKSR2	coding	9	0	chrX,+,21627734,21659650	NA	NA	ENST00000379510	ENST00000279451	8	0	0	0	0	0
147703	ALE	ENSG00000106078	COBL	coding	9	0	chr7,-,51133145,51152862	NA	NA	ENST00000395542	ENST00000333663	0	0	0	0	0	0
154488	other	ENSG00000060718	COL11A1	na	9	2	chr1,-,103491168,103491771	NA	NA	ENST00000358392	ENST00000370096	0	0	0	0	0	0
148624	ALE	ENSG00000187955	COL14A1	coding	49	12	chr8,+,121381723,121382574	NA	NA	ENST00000297848	ENST00000309791	0	0	0	0	0	3
130571	AFE	ENSG00000182871	COL18A1	coding	107	0	chr21,+,46825387,46888155	NA	NA	ENST00000359759	ENST00000400337	0	0	0	0	0	0
153013	AFE	ENSG00000197565	COL4A6	coding	42	0	chrX,-,107681222,107681415	NA	NA	ENST00000372216	ENST00000334504	0	0	0	0	0	0
130588	ALE	ENSG00000142173	COL6A2	coding	18	0	chr21,+,47546454,47549109	NA	NA	ENST00000300527	ENST00000357838	0	0	0	0	0	0
158602	other	ENSG00000170619	COMMD5	na	9	1	chr8,-,146076779,146078223	NA	NA	ENST00000450361	ENST00000305103	0	0	0	0	0	0
158603	other	ENSG00000170619	COMMD5	na	12	1	chr8,-,146076779,146078377	NA	NA	ENST00000450361	ENST00000402718	0	0	0	0	0	0
112709	AFE	ENSG00000188243	COMMD6	coding	52	0	chr13,-,76104401,76111799	NA	NA	ENST00000377619	ENST00000355801	0	0	6	0	0	0
111314	AFE	ENSG00000110880	CORO1C	coding	56	0	chr12,-,109095098,109125204	NA	NA	ENST00000420959	ENST00000261401	0	0	0	0	2	0
100064	AFE	ENSG00000175279	CORT	coding	61	0	chr1,+,10491457,10493898	NA	NA	ENST00000320498	ENST00000400900	11	3	0	5	7	0
100068	ALE	ENSG00000175279	CORT	coding	136	52	chr1,+,10500469,10502321	NA	NA	ENST00000320498	ENST00000309048	0	7	0	3	0	4
118472	AFE	ENSG00000126267	COX6B1	coding	428	178	chr19,+,36139304,36142134	NA	NA	ENST00000392201	ENST00000246554	23	80	46	226	1	43
110078	AFE	ENSG00000149532	CPSF7	coding	218	0	chr11,-,61196761,61197385	NA	NA	ENST00000340437	ENST00000394888	10	0	6	0	6	0
138854	AFE	ENSG00000109625	CPZ	coding	22	0	chr4,+,8612995,8613753	NA	NA	ENST00000360986	ENST00000458093	0	0	0	0	0	0
114128	AFE	ENSG00000166426	CRABP1	coding	13	1	chr15,+,78633677,78635840	NA	NA	ENST00000299529	ENST00000424218	0	0	0	0	0	0
100672	AFE	ENSG00000143578	CREB3L4	coding	13	0	chr1,+,153940785,153940997	NA	NA	ENST00000368607	ENST00000368600	0	0	0	0	0	0
139377	AFE	ENSG00000072832	CRMP1	coding	201	7	chr4,-,5868482,5889954	NA	NA	ENST00000324989	ENST00000397890	19	1	0	0	0	0
130853	ALE	ENSG00000205758	CRYZL1	coding	17	2	chr21,-,34967919,34968036	NA	NA	ENST00000416217	ENST00000361534	6	0	0	0	6	0
130862	ALE	ENSG00000205758	CRYZL1	coding	10	0	chr21,-,34988908,34989011	NA	NA	ENST00000416217	ENST00000413017	0	0	0	0	0	0
133480	AFE	ENSG00000213923	CSNK1E	coding	48	0	chr22,-,38710173,38713164	NA	NA	ENST00000359867	ENST00000396832	0	0	0	0	0	0
133468	ALE	ENSG00000213923	CSNK1E	coding	13	2	chr22,-,38692691,38694790	NA	NA	ENST00000359867	ENST00000413574	0	0	0	0	0	0
133469	ALE	ENSG00000213923	CSNK1E	coding	92	0	chr22,-,38693160,38694790	NA	NA	ENST00000359867	ENST00000405675	0	0	0	0	0	0
120865	AFE	ENSG00000178662	CSRNP3	coding	10	1	chr2,+,166374470,166451552	NA	NA	ENST00000409420	ENST00000421875	18	13	9	0	3	0
128952	AFE	ENSG00000101138	CSTF1	coding	9	2	chr20,+,54967870,54970576	NA	NA	ENST00000451236	ENST00000425890	0	1	0	0	0	0
122013	AFE	ENSG00000144579	CTDSP1	coding	24	0	chr2,+,219264879,219266286	NA	NA	ENST00000428361	ENST00000273062	0	0	0	0	4	6
135372	AFE	ENSG00000168036	CTNNB1	coding	171	2	chr3,+,41241160,41265511	NA	NA	ENST00000405570	ENST00000349496	97	1	129	3	155	3
135373	AFE	ENSG00000168036	CTNNB1	coding	13	2	chr3,+,41241871,41265511	NA	NA	ENST00000405570	ENST00000450969	0	0	0	0	0	0
153561	AFE	ENSG00000047230	CTPS2	coding	23	0	chrX,-,16721063,16730457	NA	NA	ENST00000380241	ENST00000359276	3	0	0	0	0	0
110453	ALE	ENSG00000109861	CTSC	coding	104	11	chr11,-,88061363,88068104	NA	NA	ENST00000227266	ENST00000320621	0	0	6	2	0	0
146531	AFE	ENSG00000077063	CTTNBP2	coding	8	1	chr7,-,117501369,117512157	NA	NA	ENST00000160373	ENST00000454375	0	0	0	0	0	0
146525	ALE	ENSG00000077063	CTTNBP2	coding	23	7	chr7,-,117395627,117396608	NA	NA	ENST00000160373	ENST00000416239	0	0	0	0	0	0
109991	AFE	ENSG00000149187	CUGBP1	coding	180	1	chr11,-,47510575,47574543	NA	NA	ENST00000422993	ENST00000310513	3	0	12	0	2	0
106131	AFE	ENSG00000048740	CUGBP2	coding	65	2	chr10,+,11207279,11207448	NA	NA	ENST00000450189	ENST00000315874	0	0	2	9	0	0
144396	AFE	ENSG00000055130	CUL1	coding	151	15	chr7,+,148396120,148427053	NA	NA	ENST00000409469	ENST00000325222	17	11	2	11	2	18
158169	other	ENSG00000055130	CUL1	na	10	0	chr7,+,148427353,148454118	NA	NA	ENST00000409469	ENST00000433865	0	0	0	0	0	0
107829	AFE	ENSG00000108094	CUL2	coding	108	0	chr10,-,35360266,35379357	NA	NA	ENST00000374748	ENST00000374742	26	0	5	0	0	1
153087	AFE	ENSG00000158290	CUL4B	coding	17	6	chrX,-,119694479,119695226	NA	NA	ENST00000404115	ENST00000371322	0	1	0	0	0	1
158118	other	ENSG00000160967	CUX1	na	25	0	chr7,+,101838882,101916636	NA	NA	ENST00000360264	ENST00000292538	0	0	1	0	0	0
125415	AFE	ENSG00000163510	CWC22	coding	44	1	chr2,-,180858180,180871796	NA	NA	ENST00000410053	ENST00000295749	0	0	0	0	0	0
107881	ALE	ENSG00000107562	CXCL12	coding	11	0	chr10,-,44868790,44874084	NA	NA	ENST00000395794	ENST00000395793	0	0	0	0	0	0
151731	AFE	ENSG00000196440	CXorf35	coding	9	0	chrX,+,100740516,100741009	NA	NA	ENST00000433011	ENST00000354842	0	0	0	0	0	0
117479	AFE	ENSG00000008283	CYB561	coding	10	0	chr17,-,61514920,61523258	NA	NA	ENST00000360793	ENST00000392976	0	0	0	0	0	0
113789	AFE	ENSG00000068793	CYFIP1	coding	9	0	chr15,+,22892780,22925776	NA	NA	ENST00000412127	ENST00000313077	0	0	0	0	0	0
107183	AFE	ENSG00000095596	CYP26A1	coding	31	2	chr10,+,94833590,94834064	NA	NA	ENST00000224356	ENST00000371531	0	0	0	0	0	0
124657	AFE	ENSG00000186684	CYP27C1	coding	9	1	chr2,-,127961146,127977564	NA	NA	ENST00000335247	ENST00000409327	0	0	0	0	0	0
116137	AFE	ENSG00000128487	CYTSB	coding	10	3	chr17,+,20059548,20107645	NA	NA	ENST00000261503	ENST00000395522	0	4	0	0	0	0
116138	ALE	ENSG00000128487	CYTSB	coding	28	0	chr17,+,20135717,20140172	NA	NA	ENST00000261503	ENST00000395525	3	0	0	1	0	0
130748	ALE	ENSG00000166265	CYYR1	coding	12	1	chr21,-,27850453,27852590	NA	NA	ENST00000435845	ENST00000400043	0	0	0	0	0	0
120444	AFE	ENSG00000155368	DBI	coding	2513	54	chr2,+,120124635,120125763	NA	NA	ENST00000419076	ENST00000355857	30	0	41	11	53	19
115963	AFE	ENSG00000003249	DBNDD1	coding	8	0	chr16,-,90075837,90085718	NA	NA	ENST00000392973	ENST00000002501	0	0	0	0	0	0
117344	ALE	ENSG00000172992	DCAKD	coding	24	1	chr17,-,43111409,43111554	NA	NA	ENST00000342350	ENST00000310604	0	0	0	0	0	0
112514	AFE	ENSG00000133083	DCLK1	coding	380	9	chr13,-,36428729,36429646	NA	NA	ENST00000360631	ENST00000379893	15	7	0	0	0	0
112513	ALE	ENSG00000133083	DCLK1	coding	9	0	chr13,-,36424912,36428635	NA	NA	ENST00000360631	ENST00000379892	0	0	1	0	0	0
127892	AFE	ENSG00000204843	DCTN1	coding	41	1	chr2,-,74605371,74618920	NA	NA	ENST00000394003	ENST00000362071	0	0	0	0	2	0
156689	other	ENSG00000204843	DCTN1	na	56	1	chr2,-,74598854,74604558	NA	NA	ENST00000394003	ENST00000362071	0	0	0	0	0	0
112380	ALE	ENSG00000150401	DCUN1D2	coding	48	56	chr13,-,114117205,114128438	NA	NA	ENST00000375403	ENST00000375399	0	0	0	0	0	5
138740	AFE	ENSG00000109184	DCUN1D4	coding	10	9	chr4,+,52709432,52729602	NA	NA	ENST00000451288	ENST00000334635	0	0	0	0	0	0
132803	ALE	ENSG00000099977	DDT	coding	38	11	chr22,-,24313811,24315956	NA	NA	ENST00000403754	ENST00000350608	0	3	11	18	17	24
151041	ALE	ENSG00000125485	DDX31	coding	22	0	chr9,-,135533744,135534057	NA	NA	ENST00000372159	ENST00000372151	0	0	0	0	0	0
119199	AFE	ENSG00000123136	DDX39	coding	247	17	chr19,-,14524035,14530081	NA	NA	ENST00000451994	ENST00000242776	6	0	2	2	3	0
110692	ALE	ENSG00000111364	DDX55	coding	23	5	chr12,+,124102418,124103143	NA	NA	ENST00000238146	ENST00000354291	0	3	0	2	0	1
150833	ALE	ENSG00000119522	DENND1A	coding	28	1	chr9,-,126164190,126165680	NA	NA	ENST00000373624	ENST00000373620	0	0	0	0	0	0
111587	AFE	ENSG00000170456	DENND5B	coding	24	0	chr12,-,31652604,31743639	NA	NA	ENST00000306833	ENST00000354285	0	2	18	1	16	0
114678	AFE	ENSG00000140543	DET1	coding	10	6	chr15,-,89074945,89089770	NA	NA	ENST00000444300	ENST00000268148	0	0	0	2	0	0
147083	AFE	ENSG00000105928	DFNA5	coding	18	0	chr7,-,24789411,24797014	NA	NA	ENST00000342947	ENST00000409775	1	0	0	0	0	0
147074	ALE	ENSG00000105928	DFNA5	coding	9	0	chr7,-,24747043,24747745	NA	NA	ENST00000342947	ENST00000446822	0	0	0	0	0	0
102156	AFE	ENSG00000117682	DHDDS	coding	18	6	chr1,+,26759008,26759381	NA	NA	ENST00000360009	ENST00000436153	6	5	0	19	0	9
135572	AFE	ENSG00000132153	DHX30	coding	39	15	chr3,+,47859606,47868836	NA	NA	ENST00000457607	ENST00000348968	14	5	7	4	2	4
111423	AFE	ENSG00000184047	DIABLO	coding	31	20	chr12,-,122702943,122709191	NA	NA	ENST00000443649	ENST00000445711	12	4	0	0	0	0
152889	ALE	ENSG00000147202	DIAPH2	coding	110	0	chrX,+,96684743,96724692	NA	NA	ENST00000373061	ENST00000355827	0	0	0	0	0	0
113755	AFE	ENSG00000100697	DICER1	coding	34	3	chr14,-,95599839,95606995	NA	NA	ENST00000343455	ENST00000393063	26	55	4	13	13	16
130043	AFE	ENSG00000101191	DIDO1	coding	11	0	chr20,-,61545757,61557783	NA	NA	ENST00000266070	ENST00000354665	0	0	0	2	0	0
155378	other	ENSG00000083520	DIS3	na	35	0	chr13,-,73352517,73355426	NA	NA	ENST00000377767	ENST00000377780	84	0	33	0	9	0
149160	AFE	ENSG00000164741	DLC1	coding	11	0	chr8,-,12973165,12990452	NA	NA	ENST00000276297	ENST00000358919	3	0	35	0	15	0
137228	AFE	ENSG00000075711	DLG1	coding	14	1	chr3,-,197024105,197024223	NA	NA	ENST00000346964	ENST00000434148	0	0	0	0	0	0
137234	AFE	ENSG00000075711	DLG1	coding	26	0	chr3,-,197024105,197024414	NA	NA	ENST00000346964	ENST00000436682	0	0	2	0	0	0
152807	AFE	ENSG00000082458	DLG3	coding	11	1	chrX,+,69672604,69673486	NA	NA	ENST00000194900	ENST00000374355	0	0	0	0	0	0
158869	other	ENSG00000082458	DLG3	na	366	102	chrX,+,69712445,69713225	NA	NA	ENST00000194900	ENST00000374355	0	11	1	4	5	5
117553	AFE	ENSG00000132535	DLG4	coding	104	9	chr17,-,7111557,7120436	NA	NA	ENST00000293813	ENST00000302955	12	5	0	0	0	0
128623	AFE	ENSG00000080845	DLGAP4	coding	33	1	chr20,+,35089912,35125107	NA	NA	ENST00000373907	ENST00000341277	0	0	0	0	0	0
128624	AFE	ENSG00000080845	DLGAP4	coding	38	4	chr20,+,35091001,35125107	NA	NA	ENST00000373907	ENST00000340491	0	0	2	1	2	0
153629	AFE	ENSG00000198947	DMD	coding	8	0	chrX,-,31279132,31284926	NA	NA	ENST00000357033	ENST00000361471	10	0	0	0	52	3
119360	AFE	ENSG00000161249	DMKN	coding	16	0	chr19,-,36001153,36001272	NA	NA	ENST00000339686	ENST00000379075	0	0	0	0	0	0
119342	ALE	ENSG00000161249	DMKN	coding	270	9	chr19,-,35994348,35996619	NA	NA	ENST00000339686	ENST00000392206	0	0	4	0	0	0
101807	ALE	ENSG00000185842	DNAH14	coding	43	7	chr1,+,225156575,225157335	NA	NA	ENST00000430092	ENST00000453375	0	0	0	0	0	0
155803	other	ENSG00000079805	DNM2	na	125	0	chr19,+,10906114,10908055	NA	NA	ENST00000359692	ENST00000314646	10	0	13	0	0	0
107268	AFE	ENSG00000107554	DNMBP	coding	73	6	chr10,-,101668902,101673709	NA	NA	ENST00000342239	ENST00000370423	0	0	0	0	0	0
126782	AFE	ENSG00000119772	DNMT3A	coding	70	18	chr2,-,25471120,25475062	NA	NA	ENST00000264709	ENST00000402667	0	0	0	0	0	0
156586	other	ENSG00000119772	DNMT3A	na	67	7	chr2,-,25471120,25472525	NA	NA	ENST00000264709	ENST00000380746	0	0	0	0	0	0
126219	AFE	ENSG00000123992	DNPEP	coding	8	0	chr2,-,220251884,220251999	NA	NA	ENST00000273075	ENST00000429013	0	0	0	0	0	0
154737	other	ENSG00000116641	DOCK7	na	34	0	chr1,-,62943504,62954604	NA	NA	ENST00000371140	ENST00000251157	0	0	0	0	3	0
118379	ALE	ENSG00000104885	DOT1L	coding	32	2	chr19,+,2227125,2229783	NA	NA	ENST00000221482	ENST00000398665	0	0	0	0	0	0
116121	AFE	ENSG00000108963	DPH1	coding	11	0	chr17,+,1945168,1945898	NA	NA	ENST00000263084	ENST00000263083	0	0	0	0	1	0
154485	other	ENSG00000117543	DPH5	na	71	2	chr1,-,101467142,101479265	NA	NA	ENST00000370106	ENST00000342173	6	0	4	0	0	0
144470	AFE	ENSG00000130226	DPP6	coding	21	0	chr7,+,154002635,154143298	NA	NA	ENST00000377770	ENST00000332007	2	0	0	0	0	0
118407	AFE	ENSG00000178904	DPY19L3	coding	43	0	chr19,+,32896814,32899122	NA	NA	ENST00000342179	ENST00000392250	15	0	0	0	0	0
126986	ALE	ENSG00000162961	DPY30	coding	503	338	chr2,-,32249324,32254662	NA	NA	ENST00000452582	ENST00000295066	28	134	8	19	27	15
140594	AFE	ENSG00000113657	DPYSL3	coding	469	358	chr5,-,146804525,146833111	NA	NA	ENST00000343218	ENST00000398514	12	29	0	4	2	1
155798	other	ENSG00000134755	DSC2	na	86	0	chr18,-,28671109,28672063	NA	NA	ENST00000438199	ENST00000251081	0	3	29	0	2	3
141010	AFE	ENSG00000111817	DSE	coding	81	0	chr6,+,116692283,116720360	NA	NA	ENST00000452085	ENST00000331677	2	0	0	0	0	0
143615	AFE	ENSG00000151914	DST	coding	13	0	chr6,-,56600086,56716194	NA	NA	ENST00000370769	ENST00000281662	35	0	0	0	0	0
158091	other	ENSG00000151914	DST	na	12	0	chr6,-,56330992,56333779	NA	NA	ENST00000370769	ENST00000244364	0	4	7	3	1	0
158092	other	ENSG00000151914	DST	na	57	6	chr6,-,56466473,56467679	NA	NA	ENST00000370769	ENST00000361203	29	26	116	156	20	8
117782	ALE	ENSG00000134769	DTNA	coding	47	3	chr18,+,32407639,32409004	NA	NA	ENST00000269190	ENST00000315456	10	30	81	53	0	0
158002	other	ENSG00000047579	DTNBP1	na	78	0	chr6,-,15533625,15593289	NA	NA	ENST00000355917	ENST00000338950	23	0	9	0	6	0
152260	AFE	ENSG00000130829	DUSP9	coding	133	0	chrX,+,152912878,152913372	NA	NA	ENST00000370167	ENST00000342782	0	0	0	0	0	0
123561	AFE	ENSG00000138036	DYNC2LI1	coding	18	2	chr2,+,44001284,44003920	NA	NA	ENST00000443170	ENST00000260605	0	0	0	6	1	0
110644	AFE	ENSG00000088986	DYNLL1	coding	207	10	chr12,+,120934018,120934218	NA	NA	ENST00000392509	ENST00000242577	79	18	55	3	31	4
128525	AFE	ENSG00000125971	DYNLRB1	coding	216	12	chr20,+,33104265,33114072	NA	NA	ENST00000374846	ENST00000300469	1	0	0	1	2	0
123948	AFE	ENSG00000135636	DYSF	coding	8	0	chr2,+,71681215,71708012	NA	NA	ENST00000410020	ENST00000258104	0	0	0	1	0	0
109806	AFE	ENSG00000129173	E2F8	coding	11	0	chr11,-,19259678,19261653	NA	NA	ENST00000396159	ENST00000250024	0	0	0	0	0	0
134049	ALE	ENSG00000145088	EAF2	coding	95	2	chr3,+,121591634,121605188	NA	NA	ENST00000451944	ENST00000273668	5	0	3	0	0	0
148606	AFE	ENSG00000147654	EBAG9	coding	30	4	chr8,+,110552689,110563038	NA	NA	ENST00000276658	ENST00000337573	2	2	1	0	9	0
148607	ALE	ENSG00000147654	EBAG9	coding	190	8	chr8,+,110573157,110576667	NA	NA	ENST00000276658	ENST00000337573	6	0	12	0	1	0
104840	AFE	ENSG00000117298	ECE1	coding	136	0	chr1,-,21616648,21671868	NA	NA	ENST00000374893	ENST00000264205	3	0	0	0	0	0
134500	ALE	ENSG00000145194	ECE2	coding	21	0	chr3,+,183975543,183976075	NA	NA	ENST00000402825	ENST00000324557	0	0	0	0	0	0
142510	AFE	ENSG00000093144	ECHDC1	coding	40	4	chr6,-,127652174,127664480	NA	NA	ENST00000368295	ENST00000309620	45	2	24	1	8	2
143668	AFE	ENSG00000156508	EEF1A1	coding	36	0	chr6,-,74229778,74231229	NA	NA	ENST00000309268	ENST00000331523	1	0	0	0	1	0
149212	AFE	ENSG00000104529	EEF1D	coding	25	0	chr8,-,144669021,144679048	NA	NA	ENST00000442189	ENST00000317198	0	0	0	0	0	0
150234	AFE	ENSG00000181090	EHMT1	coding	14	0	chr9,+,140513500,140605418	NA	NA	ENST00000420745	ENST00000334856	0	0	0	0	0	0
102378	ALE	ENSG00000126070	EIF2C3	coding	13	8	chr1,+,36439111,36448221	NA	NA	ENST00000373191	ENST00000324350	0	0	0	0	0	3
133299	ALE	ENSG00000100353	EIF3D	coding	440	74	chr22,-,36907046,36907549	NA	NA	ENST00000397177	ENST00000216190	116	0	56	0	32	0
139514	AFE	ENSG00000151247	EIF4E	coding	125	0	chr4,-,99823132,99850245	NA	NA	ENST00000394918	ENST00000450253	0	0	0	0	0	0
122472	ALE	ENSG00000135930	EIF4E2	coding	91	0	chr2,+,233431923,233445613	NA	NA	ENST00000258416	ENST00000373575	9	0	20	0	5	0
138329	AFE	ENSG00000163412	EIF4E3	coding	8	0	chr3,-,71759634,71777626	NA	NA	ENST00000425534	ENST00000295612	0	2	0	0	0	0
139690	ALE	ENSG00000131503	EIF4EBP3	coding	183	116	chr5,+,139918667,139918943	NA	NA	ENST00000253810	ENST00000310356	0	63	3	59	3	50
133167	AFE	ENSG00000184708	EIF4ENIF1	coding	36	0	chr22,-,31884730,31885679	NA	NA	ENST00000397525	ENST00000330125	0	0	0	0	0	0
109603	AFE	ENSG00000110321	EIF4G2	coding	460	362	chr11,-,10828927,10830251	NA	NA	ENST00000429377	ENST00000339995	17	121	31	51	12	32
104805	ALE	ENSG00000075151	EIF4G3	coding	12	2	chr1,-,21267887,21267983	NA	NA	ENST00000264211	ENST00000356916	0	0	0	0	0	11
116622	AFE	ENSG00000132507	EIF5A	coding	3263	467	chr17,+,7211070,7212933	NA	NA	ENST00000336452	ENST00000336458	28	37	17	22	30	8
116623	AFE	ENSG00000132507	EIF5A	coding	229	10	chr17,+,7211431,7212933	NA	NA	ENST00000336452	ENST00000419711	5	0	1	0	3	1
116624	AFE	ENSG00000132507	EIF5A	coding	81	14	chr17,+,7211893,7212933	NA	NA	ENST00000336452	ENST00000355068	0	0	0	0	0	0
119952	AFE	ENSG00000066044	ELAVL1	coding	193	1	chr19,-,8056714,8070378	NA	NA	ENST00000351593	ENST00000407627	11	0	0	0	5	0
112554	AFE	ENSG00000120690	ELF1	coding	21	1	chr13,-,41556417,41634973	NA	NA	ENST00000239882	ENST00000405737	0	0	11	7	17	1
139050	AFE	ENSG00000109381	ELF2	coding	47	7	chr4,-,139994720,140005286	NA	NA	ENST00000379550	ENST00000358635	7	11	14	0	6	7
143593	ALE	ENSG00000012660	ELOVL5	coding	31	37	chr6,-,53159288,53160439	NA	NA	ENST00000370918	ENST00000370913	0	5	0	0	1	0
108950	ALE	ENSG00000109911	ELP4	coding	20	0	chr11,+,31671768,31804940	NA	NA	ENST00000395934	ENST00000350638	0	0	0	0	0	0
157029	other	ENSG00000186998	EMID1	na	13	0	chr22,+,29639477,29650191	NA	NA	ENST00000404820	ENST00000334018	0	0	0	0	0	0
103860	AFE	ENSG00000143420	ENSA	coding	51	10	chr1,-,150600067,150601536	NA	NA	ENST00000369016	ENST00000354702	2	0	0	0	0	2
103857	ALE	ENSG00000143420	ENSA	coding	51	120	chr1,-,150595334,150598117	NA	NA	ENST00000369016	ENST00000339643	0	11	0	1	0	0
155210	other	ENSG00000183495	EP400	na	25	1	chr12,+,132446498,132464238	NA	NA	ENST00000333577	ENST00000330386	0	0	0	0	0	0
102256	AFE	ENSG00000159023	EPB41	coding	122	0	chr1,+,29241279,29313942	NA	NA	ENST00000343067	ENST00000373797	0	0	0	0	0	0
150715	ALE	ENSG00000095203	EPB41L4B	coding	393	18	chr9,-,112004088,112005897	NA	NA	ENST00000374566	ENST00000311609	0	0	0	0	5	5
120469	ALE	ENSG00000115109	EPB41L5	coding	58	1	chr2,+,120858389,120861635	NA	NA	ENST00000263713	ENST00000331393	0	0	0	0	7	7
107786	AFE	ENSG00000120616	EPC1	coding	12	0	chr10,-,32594858,32667418	NA	NA	ENST00000263062	ENST00000375110	7	8	0	5	9	3
120714	ALE	ENSG00000135999	EPC2	coding	14	2	chr2,+,149447941,149449110	NA	NA	ENST00000258484	ENST00000409654	0	0	0	0	0	0
118989	AFE	ENSG00000063245	EPN1	coding	191	0	chr19,+,56186800,56189892	NA	NA	ENST00000411543	ENST00000085079	0	0	0	0	0	0
116330	AFE	ENSG00000141736	ERBB2	coding	29	1	chr17,+,37851433,37863242	NA	NA	ENST00000269571	ENST00000406381	0	3	0	0	0	0
148855	AFE	ENSG00000147475	ERLIN2	coding	84	1	chr8,+,37594524,37595425	NA	NA	ENST00000276461	ENST00000335171	0	3	0	0	0	4
112595	ALE	ENSG00000139684	ESD	coding	20	3	chr13,-,47349826,47351590	NA	NA	ENST00000378720	ENST00000412582	0	0	18	10	2	6
110784	ALE	ENSG00000139163	ETNK1	coding	21	3	chr12,+,22796955,22797144	NA	NA	ENST00000266517	ENST00000335148	0	0	0	0	0	0
146744	AFE	ENSG00000006468	ETV1	coding	48	30	chr7,-,14027797,14028632	NA	NA	ENST00000405358	ENST00000242066	0	39	0	9	0	5
112761	AFE	ENSG00000196405	EVL	coding	72	0	chr14,+,100438393,100551023	NA	NA	ENST00000392920	ENST00000402714	1	0	0	0	0	0
151148	ALE	ENSG00000187609	EXD3	coding	12	3	chr9,-,140260812,140260944	NA	NA	ENST00000340951	ENST00000343088	0	0	0	0	0	0
155027	other	ENSG00000151348	EXT2	na	15	0	chr11,+,44117401,44129232	NA	NA	ENST00000395673	ENST00000343631	0	0	0	0	0	0
109230	AFE	ENSG00000134824	FADS2	coding	283	2	chr11,+,61583897,61605249	NA	NA	ENST00000278840	ENST00000257261	0	0	0	0	0	0
151649	AFE	ENSG00000188938	FAM120AOS	coding	46	0	chr9,-,96212880,96213369	NA	NA	ENST00000375412	ENST00000375411	0	0	0	0	0	0
156429	other	ENSG00000173272	FAM128A	na	12	0	chr2,-,132229754,132249448	NA	NA	ENST00000445782	ENST00000427024	0	0	1	0	0	0
134586	AFE	ENSG00000175182	FAM131A	coding	17	0	chr3,+,184055158,184056174	NA	NA	ENST00000383847	ENST00000450976	19	2	10	0	0	0
139502	AFE	ENSG00000138640	FAM13A	coding	11	0	chr4,-,89726202,89744126	NA	NA	ENST00000264344	ENST00000395002	0	17	0	7	5	1
132442	ALE	ENSG00000219438	FAM19A5	coding	9	0	chr22,+,49103655,49145650	NA	NA	ENST00000404215	ENST00000358295	5	1	0	0	4	0
117528	AFE	ENSG00000108950	FAM20A	coding	13	0	chr17,-,66536106,66536687	NA	NA	ENST00000226094	ENST00000375556	0	0	0	0	0	0
158590	other	ENSG00000153310	FAM49B	na	17	3	chr8,-,130891716,130892621	NA	NA	ENST00000401979	ENST00000358017	0	0	0	0	0	0
139668	AFE	ENSG00000120709	FAM53C	coding	95	0	chr5,+,137673995,137676872	NA	NA	ENST00000434981	ENST00000239906	8	0	0	0	0	0
142850	ALE	ENSG00000111913	FAM65B	coding	15	8	chr6,-,24839826,24843089	NA	NA	ENST00000259698	ENST00000229635	0	0	0	0	0	0
123473	ALE	ENSG00000115841	FAM82A1	coding	11	0	chr2,+,38231358,38244328	NA	NA	ENST00000234195	ENST00000354545	8	0	11	0	5	0
156275	other	ENSG00000115841	FAM82A1	na	10	0	chr2,+,38156871,38201182	NA	NA	ENST00000234195	ENST00000354545	0	21	0	0	0	10
116940	AFE	ENSG00000188522	FAM83G	coding	13	0	chr17,-,18907481,18908021	NA	NA	ENST00000345041	ENST00000399096	0	0	0	0	0	0
151656	AFE	ENSG00000158169	FANCC	coding	9	0	chr9,-,98011650,98079807	NA	NA	ENST00000375305	ENST00000289081	0	0	0	0	0	0
151653	ALE	ENSG00000158169	FANCC	coding	9	0	chr9,-,97873626,97873744	NA	NA	ENST00000375305	ENST00000395345	0	0	0	0	0	3
125155	AFE	ENSG00000138399	FASTKD1	coding	11	0	chr2,-,170425761,170427513	NA	NA	ENST00000453153	ENST00000417376	0	0	0	0	3	0
132390	ALE	ENSG00000077942	FBLN1	coding	77	0	chr22,+,45946494,45970390	NA	NA	ENST00000402984	ENST00000327858	0	0	0	0	0	0
147728	ALE	ENSG00000155034	FBXL18	coding	24	1	chr7,-,5521561,5530861	NA	NA	ENST00000312577	ENST00000297035	0	0	0	0	0	0
114996	AFE	ENSG00000099364	FBXL19	coding	31	0	chr16,+,30935779,30937051	NA	NA	ENST00000380310	ENST00000338343	0	0	0	0	0	0
106879	AFE	ENSG00000134452	FBXO18	coding	67	0	chr10,+,5932308,5944982	NA	NA	ENST00000379999	ENST00000362091	4	0	20	2	0	3
157826	other	ENSG00000072803	FBXW11	na	23	1	chr5,-,171337800,171341346	NA	NA	ENST00000265094	ENST00000296933	33	75	25	37	0	5
154303	other	ENSG00000160752	FDPS	na	41	3	chr1,+,155278755,155279854	NA	NA	ENST00000368356	ENST00000447866	0	27	0	9	0	4
109621	ALE	ENSG00000086848	FDXACB1	coding	34	1	chr11,-,111746827,111747204	NA	NA	ENST00000428306	ENST00000260257	8	0	0	0	0	0
153178	AFE	ENSG00000129682	FGF13	coding	83	15	chrX,-,137791089,137792978	NA	NA	ENST00000370603	ENST00000315930	15	23	0	0	0	0
149363	AFE	ENSG00000077782	FGFR1	coding	20	0	chr8,-,38315051,38316364	NA	NA	ENST00000397091	ENST00000413133	0	0	0	0	0	2
149357	ALE	ENSG00000077782	FGFR1	coding	82	3	chr8,-,38286907,38287199	NA	NA	ENST00000397091	ENST00000326296	0	0	0	0	0	0
154901	other	ENSG00000066468	FGFR2	na	316	27	chr10,-,123274832,123276832	NA	NA	ENST00000351936	ENST00000336553	32	33	1	0	8	2
102859	AFE	ENSG00000172456	FGGY	coding	13	4	chr1,+,59762578,59787207	NA	NA	ENST00000371218	ENST00000413489	0	0	0	0	0	0
146300	AFE	ENSG00000214253	FIS1	coding	88	4	chr7,-,100887419,100888240	NA	NA	ENST00000435848	ENST00000223136	19	5	11	26	12	3
111685	AFE	ENSG00000134285	FKBP11	coding	12	4	chr12,-,49318430,49318556	NA	NA	ENST00000256680	ENST00000444214	0	0	0	0	0	0
111684	ALE	ENSG00000134285	FKBP11	coding	31	5	chr12,-,49317386,49317564	NA	NA	ENST00000256680	ENST00000453172	0	0	0	0	0	0
109277	AFE	ENSG00000173486	FKBP2	coding	14	2	chr11,+,64009684,64009855	NA	NA	ENST00000309366	ENST00000394540	0	0	0	0	0	0
120756	ALE	ENSG00000157827	FMNL2	coding	42	9	chr2,+,153497427,153501947	NA	NA	ENST00000288670	ENST00000421344	7	15	0	0	1	0
112238	AFE	ENSG00000102531	FNDC3A	coding	17	0	chr13,+,49684541,49688790	NA	NA	ENST00000337156	ENST00000398316	0	11	0	0	9	11
138593	AFE	ENSG00000052795	FNIP2	coding	19	0	chr4,+,159690470,159747067	NA	NA	ENST00000379346	ENST00000264433	0	2	0	0	0	1
105488	AFE	ENSG00000198815	FOXJ3	coding	18	0	chr1,-,42776780,42800729	NA	NA	ENST00000372573	ENST00000361346	0	0	9	0	8	0
145067	AFE	ENSG00000164916	FOXK1	coding	16	0	chr7,+,4722498,4780468	NA	NA	ENST00000450194	ENST00000328914	0	0	0	0	0	0
158231	other	ENSG00000164916	FOXK1	na	18	0	chr7,+,4780653,4794089	NA	NA	ENST00000450194	ENST00000328914	0	0	0	0	0	0
149861	AFE	ENSG00000136877	FPGS	coding	20	7	chr9,+,130565682,130566563	NA	NA	ENST00000373247	ENST00000373225	0	0	0	0	0	3
105852	ALE	ENSG00000162613	FUBP1	coding	14	1	chr1,-,78413236,78414839	NA	NA	ENST00000436586	ENST00000370773	0	0	0	0	0	0
107003	ALE	ENSG00000196968	FUT11	coding	16	0	chr10,+,75533572,75535176	NA	NA	ENST00000372841	ENST00000394790	0	0	0	0	0	0
113164	AFE	ENSG00000033170	FUT8	coding	29	0	chr14,+,65879931,65922338	NA	NA	ENST00000360689	ENST00000358307	0	8	0	0	0	0
157973	other	ENSG00000010810	FYN	na	295	0	chr6,-,112017658,112020717	NA	NA	ENST00000368678	ENST00000229470	0	0	0	0	0	0
153506	AFE	ENSG00000160211	G6PD	coding	30	0	chrX,-,153774377,153775682	NA	NA	ENST00000442162	ENST00000369620	0	0	0	0	0	0
110380	AFE	ENSG00000033327	GAB2	coding	24	0	chr11,-,77991946,78128691	NA	NA	ENST00000361507	ENST00000304401	8	0	9	0	0	0
114287	AFE	ENSG00000166206	GABRB3	coding	74	0	chr15,-,27017918,27018029	NA	NA	ENST00000299267	ENST00000311550	3	0	0	0	0	0
157657	other	ENSG00000109586	GALNT7	na	35	5	chr4,+,174216993,174218945	NA	NA	ENST00000265000	ENST00000458613	6	17	2	0	0	8
155488	other	ENSG00000214013	GANC	na	28	0	chr15,+,42570787,42573114	NA	NA	ENST00000318010	ENST00000440615	3	0	0	11	8	1
111079	AFE	ENSG00000111640	GAPDH	coding	11	0	chr12,+,6644634,6645659	NA	NA	ENST00000229239	ENST00000396858	0	7	0	0	0	0
130818	AFE	ENSG00000159131	GART	coding	50	1	chr21,-,34911661,34914370	NA	NA	ENST00000381839	ENST00000361093	0	0	0	0	0	0
154594	other	ENSG00000160766	GBAP	na	66	2	chr1,-,155187839,155188178	NA	NA	ENST00000368374	ENST00000313929	3	0	0	0	0	0
147503	AFE	ENSG00000106633	GCK	coding	36	0	chr7,-,44185328,44185672	NA	NA	ENST00000345378	ENST00000336642	0	0	0	0	0	0
150554	AFE	ENSG00000187210	GCNT1	coding	92	1	chr9,+,79074220,79115831	NA	NA	ENST00000442371	ENST00000436305	0	0	0	0	0	0
150555	AFE	ENSG00000187210	GCNT1	coding	61	0	chr9,+,79075092,79115831	NA	NA	ENST00000442371	ENST00000376730	0	0	0	0	0	0
140908	AFE	ENSG00000111846	GCNT2	coding	147	8	chr6,+,10557574,10621583	NA	NA	ENST00000379597	ENST00000316170	0	0	0	0	0	0
140909	AFE	ENSG00000111846	GCNT2	coding	330	9	chr6,+,10587146,10621583	NA	NA	ENST00000379597	ENST00000265012	8	0	30	8	0	0
108103	AFE	ENSG00000057608	GDI2	coding	195	81	chr10,-,5842667,5855176	NA	NA	ENST00000380131	ENST00000380153	25	21	13	28	5	45
121137	AFE	ENSG00000178295	GEN1	coding	14	0	chr2,+,17935611,17941195	NA	NA	ENST00000317402	ENST00000381254	0	0	0	0	0	0
132056	AFE	ENSG00000100083	GGA1	coding	9	0	chr22,+,38005160,38010196	NA	NA	ENST00000381756	ENST00000449944	0	0	0	0	5	0
132058	AFE	ENSG00000100083	GGA1	coding	68	8	chr22,+,38009197,38010196	NA	NA	ENST00000381756	ENST00000326597	0	4	0	0	0	0
101943	AFE	ENSG00000152904	GGPS1	coding	435	8	chr1,+,235492092,235498556	NA	NA	ENST00000358966	ENST00000282841	36	62	26	11	10	4
111335	ALE	ENSG00000139436	GIT2	coding	24	7	chr12,-,110386650,110388971	NA	NA	ENST00000355312	ENST00000320063	0	0	0	0	0	2
117339	AFE	ENSG00000182963	GJC1	coding	12	1	chr17,-,42884836,42907429	NA	NA	ENST00000426548	ENST00000330514	0	0	0	0	0	0
120485	AFE	ENSG00000074047	GLI2	coding	89	1	chr2,+,121493860,121554866	NA	NA	ENST00000452319	ENST00000418323	0	0	0	0	0	0
158553	other	ENSG00000181638	GLI4	na	37	34	chr8,+,144351689,144356873	NA	NA	ENST00000413511	ENST00000340042	0	0	0	0	0	0
150415	AFE	ENSG00000122694	GLIPR2	coding	83	2	chr9,+,36136787,36147782	NA	NA	ENST00000396613	ENST00000377959	2	2	5	0	0	0
155757	other	ENSG00000167699	GLOD4	na	10	3	chr17,-,680227,681861	NA	NA	ENST00000397393	ENST00000301328	0	0	0	3	1	1
104575	AFE	ENSG00000023572	GLRX2	coding	13	1	chr1,-,193070333,193074393	NA	NA	ENST00000367440	ENST00000367439	0	0	9	0	0	0
121347	ALE	ENSG00000115419	GLS	coding	27	4	chr2,+,191796362,191797441	NA	NA	ENST00000320717	ENST00000338435	9	0	8	4	0	0
113025	AFE	ENSG00000100938	GMPR2	coding	26	0	chr14,+,24701993,24702424	NA	NA	ENST00000348719	ENST00000421944	6	0	0	0	0	1
113026	AFE	ENSG00000100938	GMPR2	coding	26	0	chr14,+,24702052,24702424	NA	NA	ENST00000348719	ENST00000355299	10	0	0	0	0	0
135772	AFE	ENSG00000114353	GNAI2	coding	9	0	chr3,+,50264624,50289531	NA	NA	ENST00000313601	ENST00000422163	2	0	0	0	0	0
155588	other	ENSG00000087258	GNAO1	na	195	8	chr16,+,56370771,56374745	NA	NA	ENST00000262493	ENST00000262494	32	6	0	0	8	0
129023	AFE	ENSG00000087460	GNAS	coding	572	4	chr20,+,57415940,57470666	NA	NA	ENST00000371100	ENST00000313949	0	0	0	0	0	0
129026	AFE	ENSG00000087460	GNAS	coding	38	3	chr20,+,57464407,57470666	NA	NA	ENST00000371100	ENST00000371101	0	0	3	0	0	0
129027	AFE	ENSG00000087460	GNAS	coding	1133	382	chr20,+,57466919,57470666	NA	NA	ENST00000371100	ENST00000265620	7	35	32	29	15	12
129039	ALE	ENSG00000087460	GNAS	coding	56	2	chr20,+,57474039,57475003	NA	NA	ENST00000371100	ENST00000371081	19	2	0	2	0	0
104488	AFE	ENSG00000078369	GNB1	coding	11	0	chr1,-,1756937,1763670	NA	NA	ENST00000378609	ENST00000437146	0	0	0	0	0	0
104496	AFE	ENSG00000078369	GNB1	coding	8	0	chr1,-,1770676,1771067	NA	NA	ENST00000378609	ENST00000434686	0	0	0	0	0	0
140721	ALE	ENSG00000204628	GNB2L1	coding	12	0	chr5,-,180667344,180668491	NA	NA	ENST00000376817	ENST00000456394	0	0	0	0	0	0
151370	AFE	ENSG00000159921	GNE	coding	11	0	chr9,-,36249393,36258317	NA	NA	ENST00000396594	ENST00000377902	16	0	2	0	18	0
105051	AFE	ENSG00000168243	GNG4	coding	84	0	chr1,-,235758810,235812961	NA	NA	ENST00000450593	ENST00000391854	0	0	0	0	0	0
151577	AFE	ENSG00000135052	GOLM1	coding	70	0	chr9,-,88694255,88714325	NA	NA	ENST00000257504	ENST00000376023	0	0	0	0	0	0
104855	ALE	ENSG00000092978	GPATCH2	coding	14	17	chr1,-,217783533,217783662	NA	NA	ENST00000366935	ENST00000366934	6	7	0	0	0	0
122797	AFE	ENSG00000063660	GPC1	coding	180	0	chr2,+,241375500,241398446	NA	NA	ENST00000420138	ENST00000264039	0	2	5	3	1	0
153183	AFE	ENSG00000046653	GPM6B	coding	168	0	chrX,-,13803926,13956625	NA	NA	ENST00000316715	ENST00000398361	12	0	0	0	0	0
153180	ALE	ENSG00000046653	GPM6B	coding	123	38	chrX,-,13792742,13794356	NA	NA	ENST00000316715	ENST00000355135	514	814	2	8	0	4
119935	AFE	ENSG00000125734	GPR108	coding	27	9	chr19,-,6736721,6737000	NA	NA	ENST00000264080	ENST00000430424	0	3	0	0	0	0
115152	ALE	ENSG00000159618	GPR114	coding	23	0	chr16,+,57609003,57609349	NA	NA	ENST00000394361	ENST00000340339	0	0	0	0	0	0
105780	ALE	ENSG00000116729	GPR177	coding	164	13	chr1,-,68592017,68603462	NA	NA	ENST00000354777	ENST00000262348	18	13	2	0	0	0
118265	AFE	ENSG00000099797	GPSN2	coding	473	5	chr19,+,14640522,14673336	NA	NA	ENST00000436007	ENST00000215567	3	0	0	0	16	0
118442	AFE	ENSG00000089351	GRAMD1A	coding	103	0	chr19,+,35491389,35500022	NA	NA	ENST00000453966	ENST00000317991	0	0	0	0	1	0
132425	AFE	ENSG00000075240	GRAMD4	coding	61	4	chr22,+,46973186,47022647	NA	NA	ENST00000406902	ENST00000431155	0	0	0	0	0	0
147675	AFE	ENSG00000106070	GRB10	coding	40	0	chr7,-,50771604,50772836	NA	NA	ENST00000398812	ENST00000398810	16	5	1	0	3	0
116334	AFE	ENSG00000141738	GRB7	coding	14	0	chr17,+,37894385,37898504	NA	NA	ENST00000445327	ENST00000309156	0	0	0	0	0	0
116335	AFE	ENSG00000141738	GRB7	coding	41	1	chr17,+,37894644,37898504	NA	NA	ENST00000445327	ENST00000394211	0	0	0	0	0	0
102061	ALE	ENSG00000158055	GRHL3	coding	160	28	chr1,+,24676611,24680863	NA	NA	ENST00000350501	ENST00000236255	0	0	0	0	0	0
158796	other	ENSG00000125675	GRIA3	na	138	0	chrX,+,122319841,122336487	NA	NA	ENST00000264357	ENST00000335161	1	0	0	0	1	0
119505	ALE	ENSG00000105737	GRIK5	coding	37	19	chr19,-,42503450,42507483	NA	NA	ENST00000301218	ENST00000262895	1	2	0	0	0	0
149704	AFE	ENSG00000148180	GSN	coding	85	0	chr9,+,124043839,124064240	NA	NA	ENST00000373818	ENST00000341272	2	19	3	23	0	1
132810	ALE	ENSG00000184674	GSTTP1	coding	32	4	chr22,-,24381786,24384119	NA	NA	ENST00000448934	ENST00000447865	0	0	0	0	0	8
157137	other	ENSG00000184674	GSTTP1	na	25	4	chr22,-,24379510,24384119	NA	NA	ENST00000448934	ENST00000417489	0	0	0	0	2	0
124865	AFE	ENSG00000121964	GTDC1	coding	29	0	chr2,-,144993303,145090005	NA	NA	ENST00000344850	ENST00000429978	0	0	3	0	0	0
123657	AFE	ENSG00000068781	GTF2A1L	coding	11	0	chr2,+,48757354,48807725	NA	NA	ENST00000405008	ENST00000404752	0	0	3	0	0	0
123664	ALE	ENSG00000068781	GTF2A1L	coding	29	4	chr2,+,48818993,48822366	NA	NA	ENST00000405008	ENST00000309835	0	9	0	0	1	1
126903	AFE	ENSG00000115207	GTF3C2	coding	13	0	chr2,-,27566444,27573180	NA	NA	ENST00000359541	ENST00000423998	0	0	0	0	0	0
121213	AFE	ENSG00000144366	GULP1	coding	123	19	chr2,+,189157838,189248489	NA	NA	ENST00000409830	ENST00000359135	0	6	0	0	0	0
147546	ALE	ENSG00000105968	H2AFV	coding	12	8	chr7,-,44869761,44875127	NA	NA	ENST00000421098	ENST00000222690	0	11	0	2	0	0
142614	ALE	ENSG00000112339	HBS1L	coding	43	4	chr6,-,135359163,135360710	NA	NA	ENST00000367837	ENST00000314674	0	0	4	2	8	0
152621	AFE	ENSG00000094631	HDAC6	coding	9	2	chrX,+,48660641,48661069	NA	NA	ENST00000444343	ENST00000426196	0	1	0	0	0	0
153928	ALE	ENSG00000147099	HDAC8	coding	26	1	chrX,-,71694578,71708782	NA	NA	ENST00000429103	ENST00000373559	0	0	0	2	0	1
104192	AFE	ENSG00000143321	HDGF	coding	916	79	chr1,-,156715164,156721134	NA	NA	ENST00000368206	ENST00000357325	4	3	5	8	6	6
126670	AFE	ENSG00000115677	HDLBP	coding	33	0	chr2,-,242207955,242254516	NA	NA	ENST00000310931	ENST00000391976	0	0	0	0	0	3
135800	AFE	ENSG00000114735	HEMK1	coding	12	0	chr3,+,50607004,50608361	NA	NA	ENST00000434410	ENST00000232854	1	0	0	1	2	0
152789	AFE	ENSG00000089472	HEPH	coding	66	1	chrX,+,65384311,65390399	NA	NA	ENST00000424432	ENST00000419594	0	0	2	0	1	1
149170	AFE	ENSG00000132297	HHLA1	coding	11	0	chr8,-,133090217,133091964	NA	NA	ENST00000262283	ENST00000414222	0	0	0	0	0	0
103008	AFE	ENSG00000197568	HHLA3	coding	158	0	chr1,+,70820789,70832126	NA	NA	ENST00000432224	ENST00000361764	22	0	0	0	1	0
103011	AFE	ENSG00000197568	HHLA3	coding	219	0	chr1,+,70820793,70832126	NA	NA	ENST00000432224	ENST00000370940	14	0	3	0	7	0
118716	ALE	ENSG00000124440	HIF3A	coding	25	0	chr19,+,46838242,46841483	NA	NA	ENST00000377670	ENST00000244303	0	0	0	0	0	0
100211	AFE	ENSG00000163349	HIPK1	coding	169	1	chr1,+,114472560,114483003	NA	NA	ENST00000426820	ENST00000369555	8	3	0	9	1	0
106953	AFE	ENSG00000156515	HK1	coding	268	19	chr10,+,71078765,71103582	NA	NA	ENST00000439900	ENST00000359426	10	17	12	46	0	0
158031	other	ENSG00000204525	HLA-C	na	635	1	chr6,-,31237161,31237269	NA	NA	ENST00000396254	ENST00000376228	9	0	48	2	58	1
143267	ALE	ENSG00000204267	HLA-DOB	coding	66	0	chr6,-,32796810,32797176	NA	NA	ENST00000458336	ENST00000374897	0	0	0	0	0	5
141901	AFE	ENSG00000137309	HMGA1	coding	27	0	chr6,+,34206733,34208513	NA	NA	ENST00000395004	ENST00000374116	0	0	0	0	0	0
157917	other	ENSG00000137309	HMGA1	na	68	1068	chr6,+,34211294,34212607	NA	NA	ENST00000395004	ENST00000311487	0	0	0	0	0	0
111070	ALE	ENSG00000149948	HMGA2	coding	8	3	chr12,+,66232348,66308838	NA	NA	ENST00000425208	ENST00000354636	0	0	0	0	0	0
111071	ALE	ENSG00000149948	HMGA2	coding	431	0	chr12,+,66232348,66345162	NA	NA	ENST00000425208	ENST00000403681	0	0	0	0	0	0
152151	AFE	ENSG00000029993	HMGB3	coding	33	3	chrX,+,150152063,150154067	NA	NA	ENST00000325307	ENST00000455596	0	1	0	0	0	0
115082	AFE	ENSG00000103415	HMOX2	coding	36	0	chr16,+,4526487,4555484	NA	NA	ENST00000406590	ENST00000219700	1	0	2	0	1	0
107861	AFE	ENSG00000169813	HNRNPF	coding	80	4	chr10,-,43892037,43892632	NA	NA	ENST00000443950	ENST00000437529	0	0	1	0	0	0
107864	AFE	ENSG00000169813	HNRNPF	coding	142	33	chr10,-,43892037,43903164	NA	NA	ENST00000443950	ENST00000357065	0	0	0	0	8	3
107866	AFE	ENSG00000169813	HNRNPF	coding	84	4	chr10,-,43892037,43904174	NA	NA	ENST00000443950	ENST00000356053	0	0	0	0	0	0
151564	AFE	ENSG00000165119	HNRNPK	coding	136	0	chr9,-,86593366,86595067	NA	NA	ENST00000376281	ENST00000360384	7	0	4	1	5	0
119433	AFE	ENSG00000104824	HNRNPL	coding	28	0	chr19,-,39338073,39342935	NA	NA	ENST00000221419	ENST00000388749	0	0	0	0	0	0
118594	AFE	ENSG00000105323	HNRNPUL1	coding	315	30	chr19,+,41768486,41774127	NA	NA	ENST00000392006	ENST00000352456	0	0	6	0	0	0
104789	AFE	ENSG00000127483	HP1BP3	coding	8	0	chr1,-,21107032,21113687	NA	NA	ENST00000312239	ENST00000437575	0	0	0	0	0	0
104755	ALE	ENSG00000127483	HP1BP3	coding	12	0	chr1,-,21081896,21083658	NA	NA	ENST00000312239	ENST00000446553	2	0	6	0	0	0
104758	ALE	ENSG00000127483	HP1BP3	coding	26	2	chr1,-,21102497,21103089	NA	NA	ENST00000312239	ENST00000375000	0	0	0	0	3	0
139542	AFE	ENSG00000133835	HSD17B4	coding	29	0	chr5,+,118788327,118792009	NA	NA	ENST00000414835	ENST00000256216	1	0	3	0	5	0
113359	AFE	ENSG00000080824	HSP90AA1	coding	53	20	chr14,-,102552714,102553322	NA	NA	ENST00000334701	ENST00000216281	0	13	0	0	1	8
106461	ALE	ENSG00000187522	HSPA14	coding	63	0	chr10,+,14882155,14884132	NA	NA	ENST00000378372	ENST00000378348	0	3	0	0	1	0
106462	ALE	ENSG00000187522	HSPA14	coding	16	0	chr10,+,14882155,14885369	NA	NA	ENST00000378372	ENST00000437161	0	0	0	0	0	0
105645	AFE	ENSG00000081870	HSPB11	coding	17	1	chr1,-,54405769,54411909	NA	NA	ENST00000194214	ENST00000371378	0	0	0	0	0	0
125584	AFE	ENSG00000144381	HSPD1P4	coding	77	6	chr2,-,198363573,198364505	NA	NA	ENST00000345042	ENST00000388968	2	3	2	0	3	1
104884	AFE	ENSG00000142798	HSPG2	coding	14	0	chr1,-,22214558,22215160	NA	NA	ENST00000374695	ENST00000374673	0	0	0	0	0	0
153827	AFE	ENSG00000086758	HUWE1	coding	35	0	chrX,-,53707138,53710818	NA	NA	ENST00000276009	ENST00000342160	0	0	11	1	7	0
138131	AFE	ENSG00000114378	HYAL1	coding	11	0	chr3,-,50340410,50340896	NA	NA	ENST00000449566	ENST00000395143	0	0	0	0	3	0
138109	ALE	ENSG00000186792	HYAL3	coding	8	0	chr3,-,50334957,50336643	NA	NA	ENST00000066014	ENST00000354862	0	0	0	0	0	0
138110	ALE	ENSG00000186792	HYAL3	coding	19	1	chr3,-,50335102,50336643	NA	NA	ENST00000066014	ENST00000443094	0	0	0	0	0	0
138111	ALE	ENSG00000186792	HYAL3	coding	10	0	chr3,-,50335513,50336643	NA	NA	ENST00000066014	ENST00000443842	0	0	0	1	0	0
105720	ALE	ENSG00000116237	ICMT	coding	42	2	chr1,-,6294570,6294945	NA	NA	ENST00000343813	ENST00000362035	4	1	0	2	0	0
125892	AFE	ENSG00000138413	IDH1	coding	1769	37	chr2,-,209118682,209119662	NA	NA	ENST00000423977	ENST00000345146	48	21	65	6	334	48
115551	AFE	ENSG00000187535	IFT140	coding	9	0	chr16,-,1660853,1661968	NA	NA	ENST00000293924	ENST00000426508	0	0	0	0	0	0
150320	AFE	ENSG00000096872	IFT74	coding	12	1	chr9,+,26956513,26961946	NA	NA	ENST00000433700	ENST00000380062	0	0	6	1	0	1
150322	ALE	ENSG00000096872	IFT74	coding	11	0	chr9,+,27029101,27036447	NA	NA	ENST00000433700	ENST00000429045	0	0	0	0	10	0
109824	AFE	ENSG00000167244	IGF2	coding	36	1	chr11,-,2156758,2158421	NA	NA	ENST00000337883	ENST00000381379	0	0	0	0	0	0
109827	AFE	ENSG00000167244	IGF2	coding	229	1	chr11,-,2156758,2159458	NA	NA	ENST00000337883	ENST00000381406	0	0	0	0	0	0
152350	AFE	ENSG00000073009	IKBKG	coding	32	5	chrX,+,153775959,153780202	NA	NA	ENST00000369609	ENST00000263518	0	0	5	0	0	0
130252	ALE	ENSG00000159110	IL10RB	coding	23	2	chr21,+,34633031,34634865	NA	NA	ENST00000382241	ENST00000382264	0	0	0	2	0	1
134798	ALE	ENSG00000196083	IL1RAP	coding	20	2	chr3,+,190363630,190366126	NA	NA	ENST00000317757	ENST00000072516	0	12	5	3	81	48
118192	ALE	ENSG00000129351	ILF3	coding	790	111	chr19,+,10794645,10795091	NA	NA	ENST00000449870	ENST00000250241	2	16	0	4	6	1
118193	ALE	ENSG00000129351	ILF3	coding	21	6	chr19,+,10794645,10795534	NA	NA	ENST00000449870	ENST00000420083	0	0	0	0	0	0
112823	ALE	ENSG00000203485	INF2	coding	67	0	chr14,+,105181192,105185131	NA	NA	ENST00000252520	ENST00000252527	0	1	0	0	4	0
112026	AFE	ENSG00000153487	ING1	coding	36	0	chr13,+,111366631,111371575	NA	NA	ENST00000375774	ENST00000333219	0	0	0	0	0	0
144134	ALE	ENSG00000071243	ING3	coding	13	5	chr7,+,120595677,120596213	NA	NA	ENST00000315870	ENST00000339121	34	0	6	0	1	0
122946	ALE	ENSG00000168395	ING5	coding	18	2	chr2,+,242662685,242663205	NA	NA	ENST00000313552	ENST00000340585	0	0	0	0	0	0
106274	AFE	ENSG00000198825	INPP5F	coding	133	35	chr10,+,121579050,121580357	NA	NA	ENST00000361976	ENST00000369080	27	33	0	0	0	0
109826	AFE	ENSG00000129965	INS	coding	36	1	chr11,-,2156758,2158421	NA	NA	ENST00000356578	ENST00000381379	0	0	0	0	0	0
109829	AFE	ENSG00000129965	INS	coding	229	1	chr11,-,2156758,2159458	NA	NA	ENST00000356578	ENST00000381406	0	0	0	0	0	0
158387	other	ENSG00000164880	INTS1	na	313	0	chr7,-,1518520,1519065	NA	NA	ENST00000389470	ENST00000404767	7	0	0	0	1	0
157688	other	ENSG00000138785	INTS12	na	31	20	chr4,-,106621170,106624804	NA	NA	ENST00000394735	ENST00000340139	0	6	0	0	0	0
137940	ALE	ENSG00000068745	IP6K2	coding	58	5	chr3,-,48731672,48732522	NA	NA	ENST00000395509	ENST00000340879	1	4	0	0	0	0
137941	ALE	ENSG00000068745	IP6K2	coding	30	17	chr3,-,48732256,48732522	NA	NA	ENST00000395509	ENST00000436134	0	0	0	0	0	0
140040	AFE	ENSG00000086200	IPO11	coding	42	3	chr5,+,61708755,61733100	NA	NA	ENST00000409296	ENST00000325324	0	17	0	9	0	0
136537	AFE	ENSG00000144711	IQSEC1	coding	10	0	chr3,-,12983364,13008886	NA	NA	ENST00000429247	ENST00000273221	0	0	0	0	0	0
107799	AFE	ENSG00000150093	ITGB1	coding	13	0	chr10,-,33224485,33246686	NA	NA	ENST00000374956	ENST00000396033	0	0	0	0	0	0
105740	ALE	ENSG00000142856	ITGB3BP	coding	15	2	chr1,-,63913284,63919588	NA	NA	ENST00000371092	ENST00000283568	0	7	0	0	0	0
157362	other	ENSG00000150995	ITPR1	na	12	2	chr3,+,4819057,4821233	NA	NA	ENST00000356617	ENST00000357086	69	85	3	5	0	0
124246	AFE	ENSG00000198885	ITPRIPL1	coding	13	1	chr2,+,96991586,96992379	NA	NA	ENST00000420728	ENST00000439118	0	0	0	0	0	0
130296	ALE	ENSG00000205726	ITSN1	coding	63	277	chr21,+,35208935,35209290	NA	NA	ENST00000381318	ENST00000381291	1	7	1	27	4	8
126753	ALE	ENSG00000198399	ITSN2	coding	22	23	chr2,-,24465074,24468997	NA	NA	ENST00000355123	ENST00000416160	0	37	0	45	3	23
130144	ALE	ENSG00000154721	JAM2	coding	144	3	chr21,+,27084693,27086951	NA	NA	ENST00000400532	ENST00000312957	40	15	12	13	0	0
113242	AFE	ENSG00000140044	JDP2	coding	19	0	chr14,+,75894954,75904600	NA	NA	ENST00000267569	ENST00000437176	0	0	0	0	0	0
117244	AFE	ENSG00000173801	JUP	coding	142	0	chr17,-,39928113,39942839	NA	NA	ENST00000393930	ENST00000310706	0	0	0	0	0	0
150475	AFE	ENSG00000107104	KANK1	coding	11	0	chr9,+,504753,676889	NA	NA	ENST00000382303	ENST00000223950	0	0	0	0	0	0
117852	ALE	ENSG00000167216	KATNAL2	coding	12	0	chr18,+,44603831,44624543	NA	NA	ENST00000356157	ENST00000454462	0	0	0	0	0	0
124082	AFE	ENSG00000176407	KCMF1	coding	247	6	chr2,+,85198589,85255011	NA	NA	ENST00000319855	ENST00000409785	79	7	52	8	21	2
102886	AFE	ENSG00000069424	KCNAB2	coding	10	0	chr1,+,6100704,6132814	NA	NA	ENST00000378083	ENST00000352527	0	6	0	0	0	0
121148	AFE	ENSG00000170745	KCNS3	coding	42	2	chr2,+,18060072,18098946	NA	NA	ENST00000403915	ENST00000304101	0	0	3	0	0	0
109361	AFE	ENSG00000173120	KDM2A	coding	16	0	chr11,+,67007839,67010479	NA	NA	ENST00000401583	ENST00000446134	7	3	1	0	1	3
111416	AFE	ENSG00000089094	KDM2B	coding	92	0	chr12,-,122016850,122017924	NA	NA	ENST00000377071	ENST00000377069	0	0	0	0	1	0
119126	AFE	ENSG00000079999	KEAP1	coding	11	0	chr19,-,10610755,10613372	NA	NA	ENST00000171111	ENST00000393623	0	0	0	0	0	0
115320	AFE	ENSG00000182149	KIAA0174	coding	83	57	chr16,+,71929491,71949528	NA	NA	ENST00000456820	ENST00000329908	5	26	0	4	0	5
155686	other	ENSG00000177728	KIAA0195	na	269	3	chr17,+,73485742,73486314	NA	NA	ENST00000375248	ENST00000314256	0	0	0	0	1	0
105388	AFE	ENSG00000142687	KIAA0319L	coding	24	0	chr1,-,36020119,36020500	NA	NA	ENST00000373266	ENST00000440579	0	0	0	0	0	0
105390	AFE	ENSG00000142687	KIAA0319L	coding	12	0	chr1,-,36020119,36023150	NA	NA	ENST00000373266	ENST00000426982	0	0	0	0	1	0
158719	other	ENSG00000136813	KIAA0368	na	20	3	chr9,-,114213834,114235176	NA	NA	ENST00000259335	ENST00000338205	30	35	2	24	0	1
129638	AFE	ENSG00000101407	KIAA0406	coding	23	6	chr20,-,36627729,36628806	NA	NA	ENST00000373448	ENST00000373438	0	0	0	0	0	0
117854	AFE	ENSG00000134030	KIAA0427	coding	18	2	chr18,+,46146115,46162984	NA	NA	ENST00000420275	ENST00000256413	1	9	0	3	0	2
110528	ALE	ENSG00000136051	KIAA1033	coding	11	3	chr12,+,105540923,105541387	NA	NA	ENST00000332180	ENST00000311317	0	0	0	0	0	0
102318	AFE	ENSG00000162522	KIAA1522	coding	22	0	chr1,+,33219780,33233387	NA	NA	ENST00000401073	ENST00000373481	0	0	0	0	0	0
102319	AFE	ENSG00000162522	KIAA1522	coding	33	2	chr1,+,33231427,33233387	NA	NA	ENST00000401073	ENST00000373480	0	0	0	0	0	0
149637	ALE	ENSG00000165185	KIAA1958	coding	62	11	chr9,+,115337530,115407929	NA	NA	ENST00000374244	ENST00000337530	2	0	0	0	0	0
148800	AFE	ENSG00000158941	KIAA1967	coding	12	1	chr8,+,22462930,22463248	NA	NA	ENST00000308511	ENST00000389279	0	0	0	0	0	0
129247	ALE	ENSG00000089177	KIF16B	coding	39	5	chr20,-,16337096,16351230	NA	NA	ENST00000408042	ENST00000354981	36	3	4	5	2	2
100053	ALE	ENSG00000054523	KIF1B	coding	172	3	chr1,+,10357303,10363220	NA	NA	ENST00000355249	ENST00000377083	8	0	7	17	0	2
154201	other	ENSG00000054523	KIF1B	na	272	8	chr1,+,10338185,10342457	NA	NA	ENST00000355249	ENST00000263934	0	4	0	0	0	16
112811	AFE	ENSG00000126214	KLC1	coding	133	8	chr14,+,104095830,104120900	NA	NA	ENST00000445352	ENST00000246489	270	105	75	12	0	3
112810	ALE	ENSG00000126214	KLC1	coding	181	12	chr14,+,104053700,104056517	NA	NA	ENST00000445352	ENST00000247618	26	38	18	43	26	5
155395	other	ENSG00000126214	KLC1	na	46	0	chr14,+,104145881,104153417	NA	NA	ENST00000445352	ENST00000246489	2	0	13	0	0	0
155396	other	ENSG00000126214	KLC1	na	9	0	chr14,+,104145881,104166991	NA	NA	ENST00000445352	ENST00000348520	1	0	0	0	0	0
138594	AFE	ENSG00000109466	KLHL2	coding	31	1	chr4,+,166129053,166141085	NA	NA	ENST00000421009	ENST00000226725	37	6	0	0	8	3
113545	AFE	ENSG00000179454	KLHL28	coding	22	3	chr14,-,45415130,45431048	NA	NA	ENST00000355081	ENST00000396128	0	0	6	0	0	0
138697	ALE	ENSG00000109790	KLHL5	coding	102	11	chr4,+,39116949,39122629	NA	NA	ENST00000359687	ENST00000261425	43	26	0	0	18	5
144625	AFE	ENSG00000122550	KLHL7	coding	30	1	chr7,+,23146412,23163395	NA	NA	ENST00000339077	ENST00000409689	7	0	8	1	0	0
144629	ALE	ENSG00000122550	KLHL7	coding	121	17	chr7,+,23164790,23165379	NA	NA	ENST00000339077	ENST00000322275	2	15	42	3	0	0
144630	ALE	ENSG00000122550	KLHL7	coding	29	9	chr7,+,23191827,23195609	NA	NA	ENST00000339077	ENST00000414163	0	5	0	5	0	0
128744	ALE	ENSG00000185513	L3MBTL	coding	11	0	chr20,+,42157384,42157842	NA	NA	ENST00000373135	ENST00000457824	0	0	0	0	0	0
140930	AFE	ENSG00000135537	LACE1	coding	10	0	chr6,+,108640994,108645028	NA	NA	ENST00000368977	ENST00000437715	0	0	0	1	4	0
153084	ALE	ENSG00000005893	LAMP2	coding	73	42	chrX,-,119573147,119575584	NA	NA	ENST00000434600	ENST00000371335	159	507	0	68	12	77
138510	ALE	ENSG00000138709	LARP2	coding	69	0	chr4,+,129028467,129029037	NA	NA	ENST00000326639	ENST00000394288	0	0	1	0	1	0
114564	ALE	ENSG00000166173	LARP6	coding	9	0	chr15,-,71144058,71146227	NA	NA	ENST00000299213	ENST00000344870	12	0	0	3	0	0
138461	AFE	ENSG00000174720	LARP7	coding	12	2	chr4,+,113558758,113565823	NA	NA	ENST00000344442	ENST00000324052	0	6	8	0	0	0
123277	AFE	ENSG00000213626	LBH	coding	188	14	chr2,+,30454629,30457270	NA	NA	ENST00000401506	ENST00000395323	5	0	86	22	2	3
104918	AFE	ENSG00000143815	LBR	coding	35	1	chr1,-,225611790,225615655	NA	NA	ENST00000338179	ENST00000272163	0	0	1	0	0	4
114883	AFE	ENSG00000205629	LCMT1	coding	87	1	chr16,+,25123316,25139795	NA	NA	ENST00000380962	ENST00000380963	1	0	5	5	0	0
139152	ALE	ENSG00000178177	LCORL	coding	17	14	chr4,-,17847523,17887690	NA	NA	ENST00000382226	ENST00000326877	0	0	0	0	0	0
107349	AFE	ENSG00000198728	LDB1	coding	240	4	chr10,-,103871292,103874162	NA	NA	ENST00000425280	ENST00000361198	0	0	2	0	5	0
139607	ALE	ENSG00000164406	LEAP2	coding	19	0	chr5,+,132209780,132210101	NA	NA	ENST00000378648	ENST00000296877	5	0	10	0	373	85
102940	ALE	ENSG00000116678	LEPR	coding	9	1	chr1,+,66088663,66098834	NA	NA	ENST00000349533	ENST00000371060	0	0	8	11	6	53
155240	other	ENSG00000110811	LEPREL2	na	10	2	chr12,+,6939933,6940033	NA	NA	ENST00000290510	ENST00000251761	0	2	0	0	0	0
148827	ALE	ENSG00000104660	LEPROTL1	coding	189	176	chr8,+,29962001,29963261	NA	NA	ENST00000442880	ENST00000321250	6	153	1	71	6	39
116271	ALE	ENSG00000005156	LIG3	coding	14	0	chr17,+,33329807,33330013	NA	NA	ENST00000378526	ENST00000262327	0	0	0	0	0	0
138711	AFE	ENSG00000064042	LIMCH1	coding	21	0	chr4,+,41608020,41615482	NA	NA	ENST00000313875	ENST00000313860	21	67	10	74	0	3
145446	AFE	ENSG00000106683	LIMK1	coding	119	9	chr7,+,73498374,73500077	NA	NA	ENST00000418310	ENST00000336180	10	13	0	0	0	0
131913	AFE	ENSG00000182541	LIMK2	coding	59	2	chr22,+,31621804,31654276	NA	NA	ENST00000340552	ENST00000331728	0	0	0	0	0	0
131915	ALE	ENSG00000182541	LIMK2	coding	36	5	chr22,+,31671293,31674282	NA	NA	ENST00000340552	ENST00000331728	0	0	0	1	0	0
120134	AFE	ENSG00000169756	LIMS1	coding	41	0	chr2,+,109151049,109276060	NA	NA	ENST00000409441	ENST00000428064	0	0	0	0	0	0
139477	AFE	ENSG00000189308	LIN54	coding	37	0	chr4,-,83906028,83933944	NA	NA	ENST00000340417	ENST00000446851	0	0	0	0	0	0
108410	AFE	ENSG00000107798	LIPA	coding	37	0	chr10,-,91007405,91011493	NA	NA	ENST00000371829	ENST00000336233	12	0	3	0	10	0
124304	AFE	ENSG00000144182	LIPT1	coding	15	0	chr2,+,99772006,99772763	NA	NA	ENST00000393473	ENST00000415142	0	0	0	0	0	0
103177	AFE	ENSG00000143013	LMO4	coding	11	1	chr1,+,87797496,87797695	NA	NA	ENST00000370544	ENST00000370542	0	2	0	0	0	0
158718	other	ENSG00000198121	LPAR1	na	22	2	chr9,-,113704447,113734352	NA	NA	ENST00000449490	ENST00000358883	128	20	11	0	4	0
154457	other	ENSG00000117114	LPHN2	na	28	3	chr1,+,82451038,82452972	NA	NA	ENST00000370725	ENST00000370715	0	0	20	9	23	0
154458	other	ENSG00000117114	LPHN2	na	8	0	chr1,+,82455392,82456074	NA	NA	ENST00000370725	ENST00000370715	14	0	0	0	0	0
112235	ALE	ENSG00000136141	LRCH1	coding	8	6	chr13,+,47308132,47324674	NA	NA	ENST00000389797	ENST00000311191	8	22	0	0	0	13
142161	ALE	ENSG00000137269	LRRC1	coding	10	4	chr6,+,53747773,53748748	NA	NA	ENST00000370888	ENST00000370882	0	7	0	0	0	0
143898	AFE	ENSG00000128606	LRRC17	coding	10	0	chr7,+,102574023,102574220	NA	NA	ENST00000339431	ENST00000455453	0	0	0	0	0	0
154433	other	ENSG00000116212	LRRC42	na	16	0	chr1,+,54412221,54413534	NA	NA	ENST00000371370	ENST00000371368	0	0	0	0	0	0
122690	ALE	ENSG00000124831	LRRFIP1	coding	43	7	chr2,+,238668847,238678585	NA	NA	ENST00000392000	ENST00000308482	3	6	0	0	0	0
109405	ALE	ENSG00000184154	LRTOMT	coding	15	1	chr11,+,71806141,71806424	NA	NA	ENST00000435085	ENST00000289488	2	3	0	1	7	0
147251	AFE	ENSG00000106355	LSM5	coding	10	0	chr7,-,32528955,32534841	NA	NA	ENST00000450169	ENST00000409909	6	0	0	0	0	0
113028	AFE	ENSG00000213903	LTB4R	coding	10	1	chr14,+,24784221,24784842	NA	NA	ENST00000345363	ENST00000396782	0	0	0	0	0	0
113029	AFE	ENSG00000213903	LTB4R	coding	56	0	chr14,+,24784225,24784842	NA	NA	ENST00000345363	ENST00000396789	0	0	0	0	0	0
139337	AFE	ENSG00000145220	LYAR	coding	37	0	chr4,-,4288298,4291762	NA	NA	ENST00000452476	ENST00000343470	0	0	0	0	0	0
149203	AFE	ENSG00000180155	LYNX1	coding	35	0	chr8,-,143857536,143858521	NA	NA	ENST00000335822	ENST00000398906	3	0	2	0	0	0
149200	ALE	ENSG00000180155	LYNX1	coding	28	1	chr8,-,143856780,143857010	NA	NA	ENST00000335822	ENST00000345173	0	6	4	0	0	0
114829	AFE	ENSG00000102897	LYRM1	coding	33	0	chr16,+,20912210,20926877	NA	NA	ENST00000439021	ENST00000412082	5	0	14	0	0	0
114830	AFE	ENSG00000102897	LYRM1	coding	36	1	chr16,+,20914038,20926877	NA	NA	ENST00000439021	ENST00000219168	0	0	0	2	0	0
106050	AFE	ENSG00000107816	LZTS2	coding	11	0	chr10,+,102759708,102762253	NA	NA	ENST00000370223	ENST00000454422	0	1	0	0	0	0
154402	other	ENSG00000127603	MACF1	na	88	1	chr1,+,39793024,39815149	NA	NA	ENST00000289893	ENST00000317713	35	13	0	0	7	9
158402	other	ENSG00000002822	MAD1L1	na	15	1	chr7,-,1855863,1937835	NA	NA	ENST00000265854	ENST00000399654	0	2	0	0	0	0
142078	AFE	ENSG00000124688	MAD2L1BP	coding	152	1	chr6,+,43603657,43604117	NA	NA	ENST00000451025	ENST00000372171	13	0	25	0	3	0
109110	AFE	ENSG00000110514	MADD	coding	9	0	chr11,+,47291796,47295377	NA	NA	ENST00000311027	ENST00000395336	4	1	8	0	0	0
152686	AFE	ENSG00000179222	MAGED1	coding	25	0	chrX,+,51546212,51637364	NA	NA	ENST00000375695	ENST00000375772	0	0	4	0	0	0
152734	AFE	ENSG00000102316	MAGED2	coding	118	2	chrX,+,54834865,54835735	NA	NA	ENST00000375068	ENST00000218439	65	0	37	0	19	6
152735	AFE	ENSG00000102316	MAGED2	coding	57	0	chrX,+,54835655,54835735	NA	NA	ENST00000375068	ENST00000396224	0	4	0	0	0	0
150597	AFE	ENSG00000135040	MAK10	coding	12	0	chr9,+,88556788,88557069	NA	NA	ENST00000361671	ENST00000376040	7	0	2	8	0	2
121841	AFE	ENSG00000078018	MAP2	coding	11	0	chr2,+,210372364,210444759	NA	NA	ENST00000360351	ENST00000199940	27	0	0	0	6	0
134636	ALE	ENSG00000073803	MAP3K13	coding	21	20	chr3,+,185003430,185009400	NA	NA	ENST00000424227	ENST00000448876	1	64	0	0	2	0
124664	AFE	ENSG00000169967	MAP3K2	coding	9	0	chr2,-,128100769,128145027	NA	NA	ENST00000409947	ENST00000409179	5	0	4	0	17	0
141223	AFE	ENSG00000055208	MAP3K7IP2	coding	29	0	chr6,+,149663968,149691044	NA	NA	ENST00000286332	ENST00000367456	1	10	11	7	2	0
137794	AFE	ENSG00000047849	MAP4	coding	18	0	chr3,-,47919012,47932513	NA	NA	ENST00000360240	ENST00000335271	26	3	0	0	0	0
137795	AFE	ENSG00000047849	MAP4	coding	11	0	chr3,-,47919012,47950527	NA	NA	ENST00000360240	ENST00000264724	0	0	27	68	0	1
137796	ALE	ENSG00000047849	MAP4	coding	10	0	chr3,-,47953910,47956306	NA	NA	ENST00000360240	ENST00000425068	0	7	25	121	0	1
119430	ALE	ENSG00000104814	MAP4K1	coding	31	1	chr19,-,39078456,39083921	NA	NA	ENST00000221409	ENST00000396857	0	0	0	0	0	0
142632	AFE	ENSG00000135525	MAP7	coding	130	0	chr6,-,136742936,136871479	NA	NA	ENST00000454590	ENST00000345567	0	0	0	0	0	0
153595	AFE	ENSG00000184368	MAP7D2	coding	10	9	chrX,-,20062641,20068941	NA	NA	ENST00000379651	ENST00000429439	0	0	0	0	0	0
157919	other	ENSG00000112062	MAPK14	na	40	0	chr6,+,36044384,36063763	NA	NA	ENST00000229795	ENST00000229794	18	0	17	0	42	0
154837	other	ENSG00000107643	MAPK8	na	142	26	chr10,+,49628362,49632556	NA	NA	ENST00000374189	ENST00000374176	5	0	0	5	5	1
140711	ALE	ENSG00000050748	MAPK9	coding	90	25	chr5,-,179674509,179675972	NA	NA	ENST00000455781	ENST00000425491	11	9	3	14	0	12
157833	other	ENSG00000050748	MAPK9	na	125	14	chr5,-,179669754,179674438	NA	NA	ENST00000455781	ENST00000347470	40	34	79	24	38	3
150858	ALE	ENSG00000119487	MAPKAP1	coding	10	0	chr9,-,128284043,128305337	NA	NA	ENST00000265960	ENST00000394060	0	0	2	0	13	0
135809	AFE	ENSG00000114738	MAPKAPK3	coding	35	0	chr3,+,50654656,50654944	NA	NA	ENST00000446044	ENST00000357955	0	0	0	3	0	0
109258	AFE	ENSG00000072518	MARK2	coding	27	2	chr11,+,63607031,63662630	NA	NA	ENST00000402010	ENST00000350490	8	4	0	1	0	0
115319	ALE	ENSG00000140832	MARVELD3	coding	31	9	chr16,+,71663396,71668095	NA	NA	ENST00000299952	ENST00000268485	0	0	0	0	0	0
139886	AFE	ENSG00000038274	MAT2B	coding	87	10	chr5,+,162930429,162939007	NA	NA	ENST00000321757	ENST00000280969	8	14	5	18	3	6
139672	AFE	ENSG00000015479	MATR3	coding	91	2	chr5,+,138629493,138642927	NA	NA	ENST00000445468	ENST00000394805	5	0	9	0	3	0
118098	AFE	ENSG00000141644	MBD1	coding	31	1	chr18,-,47806386,47807732	NA	NA	ENST00000424334	ENST00000269468	7	0	0	0	1	1
118105	ALE	ENSG00000134046	MBD2	coding	823	78	chr18,-,51729471,51731367	NA	NA	ENST00000256429	ENST00000398398	0	0	0	0	0	0
115454	AFE	ENSG00000198211	MC1R	coding	26	6	chr16,+,89989865,89998978	NA	NA	ENST00000304984	ENST00000315491	2	2	0	0	0	0
112055	AFE	ENSG00000126217	MCF2L	coding	15	0	chr13,+,113556684,113669076	NA	NA	ENST00000375604	ENST00000375608	0	0	0	0	0	0
112061	AFE	ENSG00000126217	MCF2L	coding	12	0	chr13,+,113623771,113669076	NA	NA	ENST00000375604	ENST00000430480	0	15	0	0	0	0
148496	AFE	ENSG00000166508	MCM7	coding	19	0	chr7,-,99697715,99697835	NA	NA	ENST00000303887	ENST00000394064	4	15	0	6	0	13
156787	other	ENSG00000125885	MCM8	na	20	1	chr20,+,5948670,5952652	NA	NA	ENST00000378886	ENST00000265187	0	0	0	0	0	0
111699	AFE	ENSG00000187778	MCRS1	coding	173	40	chr12,-,49959997,49960504	NA	NA	ENST00000357123	ENST00000343810	5	14	8	19	2	6
151932	AFE	ENSG00000232119	MCTS1	coding	182	20	chrX,+,119738101,119739261	NA	NA	ENST00000371315	ENST00000371317	108	19	29	1	43	6
142006	AFE	ENSG00000112559	MDFI	coding	41	0	chr6,+,41606389,41606476	NA	NA	ENST00000373051	ENST00000230321	0	0	0	0	0	0
109041	AFE	ENSG00000110492	MDK	coding	64	0	chr11,+,46402732,46403606	NA	NA	ENST00000405098	ENST00000405308	0	0	0	0	0	0
109058	ALE	ENSG00000110492	MDK	coding	358	7	chr11,+,46403682,46403843	NA	NA	ENST00000405098	ENST00000441869	0	1	0	0	0	0
111096	AFE	ENSG00000135679	MDM2	coding	34	1	chr12,+,69202865,69202987	NA	NA	ENST00000393417	ENST00000393415	0	0	0	0	0	0
155862	other	ENSG00000104973	MED25	na	16	0	chr19,+,50339662,50340103	NA	NA	ENST00000377077	ENST00000312865	1	0	0	0	0	0
155456	other	ENSG00000068305	MEF2A	na	44	3	chr15,+,100185968,100211527	NA	NA	ENST00000346108	ENST00000338042	38	48	91	36	13	29
119292	AFE	ENSG00000064489	MEF2B	coding	15	0	chr19,-,19261572,19291494	NA	NA	ENST00000410050	ENST00000162023	0	0	0	0	0	0
119293	ALE	ENSG00000064489	MEF2B	coding	15	0	chr19,-,19261572,19291494	NA	NA	ENST00000354191	ENST00000162023	0	0	0	0	0	0
105364	AFE	ENSG00000162591	MEGF6	coding	12	0	chr1,-,3440809,3447643	NA	NA	ENST00000452816	ENST00000294599	0	0	0	0	0	0
144237	AFE	ENSG00000106484	MEST	coding	57	1	chr7,+,130126235,130135208	NA	NA	ENST00000223215	ENST00000341441	0	0	0	0	1	0
150038	AFE	ENSG00000148335	METTL11A	coding	40	3	chr9,+,132388573,132394928	NA	NA	ENST00000372486	ENST00000372481	4	0	8	0	1	2
157464	other	ENSG00000206562	METTL6	na	50	14	chr3,-,15457089,15457278	NA	NA	ENST00000443029	ENST00000383789	21	7	0	3	1	3
125194	AFE	ENSG00000123600	METTL8	coding	17	0	chr2,-,172248706,172291183	NA	NA	ENST00000375258	ENST00000428182	0	1	0	0	0	0
139140	AFE	ENSG00000198948	MFAP3L	coding	40	1	chr4,-,170927160,170927753	NA	NA	ENST00000361618	ENST00000393702	33	1	4	0	22	0
157836	other	ENSG00000131446	MGAT1	na	155	1	chr5,-,180220096,180229679	NA	NA	ENST00000333055	ENST00000307826	0	0	0	0	4	0
111922	AFE	ENSG00000182050	MGAT4C	coding	32	2	chr12,-,86383329,86443451	NA	NA	ENST00000393205	ENST00000393206	35	9	8	3	0	0
110761	AFE	ENSG00000008394	MGST1	coding	2227	12	chr12,+,16500643,16507164	NA	NA	ENST00000010404	ENST00000396210	54	0	0	0	298	1
110762	AFE	ENSG00000008394	MGST1	coding	43	8	chr12,+,16500831,16507164	NA	NA	ENST00000010404	ENST00000396209	6	1	8	0	2	0
101739	AFE	ENSG00000154305	MIA3	coding	9	0	chr1,+,222817927,222818895	NA	NA	ENST00000344922	ENST00000284471	0	1	0	0	1	7
133560	AFE	ENSG00000196588	MKL1	coding	70	3	chr22,-,40831557,40859224	NA	NA	ENST00000396617	ENST00000355630	0	0	2	0	0	0
114765	AFE	ENSG00000186260	MKL2	coding	8	1	chr16,+,14234616,14304099	NA	NA	ENST00000341243	ENST00000318282	0	5	0	0	0	5
114766	ALE	ENSG00000186260	MKL2	coding	10	0	chr16,+,14334340,14334471	NA	NA	ENST00000341243	ENST00000343519	0	0	0	0	0	0
106543	ALE	ENSG00000078403	MLLT10	coding	41	2	chr10,+,21827840,21845571	NA	NA	ENST00000307729	ENST00000377100	0	5	1	0	0	2
141352	ALE	ENSG00000130396	MLLT4	coding	14	2	chr6,+,168352866,168363118	NA	NA	ENST00000400822	ENST00000392108	0	0	0	0	0	1
133149	AFE	ENSG00000133422	MORC2	coding	11	0	chr22,-,31354679,31359210	NA	NA	ENST00000397641	ENST00000215862	0	0	0	0	0	0
152972	AFE	ENSG00000123562	MORF4L2	coding	330	297	chrX,-,102940187,102941558	NA	NA	ENST00000360458	ENST00000372619	54	22	4	0	1	3
154212	other	ENSG00000155363	MOV10	na	17	4	chr1,+,113217670,113229587	NA	NA	ENST00000369648	ENST00000369644	0	0	0	0	0	0
117330	AFE	ENSG00000108852	MPP2	coding	32	31	chr17,-,41975747,41977838	NA	NA	ENST00000225995	ENST00000377184	0	0	0	0	0	0
144683	AFE	ENSG00000105926	MPP6	coding	38	0	chr7,+,24613211,24663284	NA	NA	ENST00000409253	ENST00000222644	4	1	0	0	1	0
110481	AFE	ENSG00000020922	MRE11A	coding	233	6	chr11,-,94224130,94225947	NA	NA	ENST00000407439	ENST00000323929	53	0	12	0	20	0
108873	ALE	ENSG00000214026	MRPL23	coding	512	175	chr11,+,1974084,1977485	NA	NA	ENST00000397297	ENST00000228013	15	10	3	7	9	12
117413	AFE	ENSG00000108826	MRPL27	coding	162	2	chr17,-,48447946,48450491	NA	NA	ENST00000393275	ENST00000225969	11	0	17	0	5	3
107284	ALE	ENSG00000055950	MRPL43	coding	50	16	chr10,-,102741299,102743511	NA	NA	ENST00000370242	ENST00000299179	1	10	10	7	0	1
146759	AFE	ENSG00000090263	MRPS33	coding	15	24	chr7,-,140710459,140714350	NA	NA	ENST00000324787	ENST00000393008	18	51	0	9	0	2
140124	ALE	ENSG00000134056	MRPS36	coding	246	21	chr5,+,68524213,68525034	NA	NA	ENST00000396510	ENST00000256441	130	148	188	177	103	75
157881	other	ENSG00000124532	MRS2	na	60	17	chr6,+,24409800,24412449	NA	NA	ENST00000443868	ENST00000378353	5	17	7	20	2	8
123630	ALE	ENSG00000095002	MSH2	coding	19	0	chr2,+,47708009,47739441	NA	NA	ENST00000233146	ENST00000406134	0	0	0	0	0	2
116538	ALE	ENSG00000153944	MSI2	coding	9	1	chr17,+,55704663,55709151	NA	NA	ENST00000284073	ENST00000322684	15	0	0	0	0	1
123550	AFE	ENSG00000057935	MTA3	coding	16	3	chr2,+,42722393,42797576	NA	NA	ENST00000405094	ENST00000405592	25	18	0	0	0	0
123552	AFE	ENSG00000057935	MTA3	coding	13	1	chr2,+,42795365,42797576	NA	NA	ENST00000405094	ENST00000406652	0	0	0	0	0	0
141243	ALE	ENSG00000120254	MTHFD1L	coding	245	12	chr6,+,151209116,151219995	NA	NA	ENST00000367321	ENST00000367307	0	0	0	0	0	0
103547	AFE	ENSG00000177000	MTHFR	coding	18	0	chr1,-,11863185,11865944	NA	NA	ENST00000376583	ENST00000376486	2	0	0	0	0	0
112435	AFE	ENSG00000122033	MTIF3	coding	20	0	chr13,-,28019292,28024278	NA	NA	ENST00000381120	ENST00000405591	0	0	0	0	0	0
107764	AFE	ENSG00000107951	MTPAP	coding	192	14	chr10,-,30630568,30638047	NA	NA	ENST00000358107	ENST00000263063	19	0	28	0	8	2
138236	AFE	ENSG00000213533	MUSTN1	coding	20	0	chr3,-,52867764,52868955	NA	NA	ENST00000307872	ENST00000446157	1	0	0	0	2	0
105545	AFE	ENSG00000132781	MUTYH	coding	19	0	chr1,-,45800182,45805647	NA	NA	ENST00000450313	ENST00000354383	0	0	0	0	0	0
117640	ALE	ENSG00000182534	MXRA7	coding	72	0	chr17,-,74673783,74681153	NA	NA	ENST00000331934	ENST00000355797	2	7	0	0	0	0
117644	ALE	ENSG00000182534	MXRA7	coding	41	2	chr17,-,74680008,74681153	NA	NA	ENST00000331934	ENST00000375036	52	1	20	2	0	0
118845	AFE	ENSG00000179820	MYADM	coding	288	0	chr19,+,54371196,54373007	NA	NA	ENST00000336967	ENST00000391770	1	0	2	0	0	0
118846	AFE	ENSG00000179820	MYADM	coding	9	0	chr19,+,54372851,54373007	NA	NA	ENST00000336967	ENST00000391769	0	0	0	0	0	0
125054	ALE	ENSG00000233718	MYCNOS	coding	9	4	chr2,-,16080472,16081095	NA	NA	ENST00000420452	ENST00000419083	0	0	0	0	0	0
134380	ALE	ENSG00000085274	MYNN	coding	8	0	chr3,+,169501347,169501517	NA	NA	ENST00000349841	ENST00000392733	0	0	0	0	0	0
116846	AFE	ENSG00000197879	MYO1C	coding	9	0	chr17,-,1387596,1388987	NA	NA	ENST00000359786	ENST00000438665	0	0	0	0	0	0
155821	other	ENSG00000099331	MYO9B	na	28	0	chr19,+,17317592,17317921	NA	NA	ENST00000319396	ENST00000397274	0	0	2	0	0	0
104402	AFE	ENSG00000008130	NADK	coding	685	1	chr1,-,1696884,1709727	NA	NA	ENST00000378625	ENST00000160596	6	0	0	0	21	0
104403	AFE	ENSG00000008130	NADK	coding	8	0	chr1,-,1696884,1710184	NA	NA	ENST00000378625	ENST00000341991	0	0	0	0	0	0
109883	AFE	ENSG00000205531	NAP1L4	coding	11	0	chr11,-,3000466,3013023	NA	NA	ENST00000399624	ENST00000430811	7	0	27	0	10	0
112220	ALE	ENSG00000172766	NARG1L	coding	14	4	chr13,+,41936294,41936866	NA	NA	ENST00000379406	ENST00000379367	0	1	0	0	0	0
101410	AFE	ENSG00000134369	NAV1	coding	38	0	chr1,+,201709203,201749548	NA	NA	ENST00000367296	ENST00000367295	0	0	7	12	1	0
108877	AFE	ENSG00000166833	NAV2	coding	22	0	chr11,+,20044677,20057504	NA	NA	ENST00000396087	ENST00000311043	3	0	0	0	0	5
104376	ALE	ENSG00000219481	NBPF1	coding	15	4	chr1,-,16934185,16935002	NA	NA	ENST00000287968	ENST00000449853	0	1	0	0	0	0
149095	ALE	ENSG00000104490	NCALD	coding	11	1	chr8,-,102701633,102705018	NA	NA	ENST00000395919	ENST00000220931	66	59	0	0	0	3
146908	ALE	ENSG00000146918	NCAPG2	coding	894	32	chr7,-,158424408,158436980	NA	NA	ENST00000409339	ENST00000275830	0	0	13	0	2	0
137188	AFE	ENSG00000114503	NCBP2	coding	13	9	chr3,-,196666302,196668805	NA	NA	ENST00000321256	ENST00000452404	0	0	0	0	0	0
102372	AFE	ENSG00000020129	NCDN	coding	8	1	chr1,+,36024285,36024707	NA	NA	ENST00000356090	ENST00000437806	0	0	0	2	0	0
137929	ALE	ENSG00000213672	NCKIPSD	coding	153	39	chr3,-,48712179,48715996	NA	NA	ENST00000341520	ENST00000294129	0	1	0	0	0	0
126386	AFE	ENSG00000115053	NCL	coding	41	0	chr2,-,232328026,232328853	NA	NA	ENST00000322723	ENST00000454824	0	0	0	0	0	0
106855	AFE	ENSG00000138293	NCOA4	coding	20	0	chr10,+,51572491,51579127	NA	NA	ENST00000452682	ENST00000344348	11	0	2	0	0	2
114779	AFE	ENSG00000072864	NDE1	coding	24	1	chr16,+,15744150,15758592	NA	NA	ENST00000396353	ENST00000396354	0	0	0	0	0	0
114780	ALE	ENSG00000072864	NDE1	coding	8	7	chr16,+,15790716,15818047	NA	NA	ENST00000396353	ENST00000342673	2	2	1	0	0	1
113443	AFE	ENSG00000165795	NDRG2	coding	11	0	chr14,-,21492254,21493187	NA	NA	ENST00000298687	ENST00000397853	9	1	3	0	2	0
113444	AFE	ENSG00000165795	NDRG2	coding	14	0	chr14,-,21492254,21493552	NA	NA	ENST00000298687	ENST00000397844	8	0	1	0	0	0
155592	other	ENSG00000103034	NDRG4	na	9	0	chr16,+,58534980,58537701	NA	NA	ENST00000394282	ENST00000356752	2	1	0	1	0	0
126498	ALE	ENSG00000130414	NDUFA10	coding	245	44	chr2,-,240900602,240929490	NA	NA	ENST00000307300	ENST00000252711	0	10	12	27	0	10
156568	other	ENSG00000130414	NDUFA10	na	1039	24	chr2,-,240954276,240957969	NA	NA	ENST00000307300	ENST00000252711	15	0	134	16	13	11
119908	ALE	ENSG00000174886	NDUFA11	coding	396	1	chr19,-,5894864,5896463	NA	NA	ENST00000381587	ENST00000308961	1	0	8	2	10	1
118857	AFE	ENSG00000170906	NDUFA3	coding	95	0	chr19,+,54606195,54606421	NA	NA	ENST00000391765	ENST00000303553	3	0	27	0	3	0
125814	AFE	ENSG00000023228	NDUFS1	coding	414	13	chr2,-,207018405,207024064	NA	NA	ENST00000455934	ENST00000233190	20	0	37	6	32	3
117957	AFE	ENSG00000178127	NDUFV2	coding	65	0	chr18,+,9102794,9117835	NA	NA	ENST00000400033	ENST00000318388	15	0	2	0	5	0
156910	other	ENSG00000160194	NDUFV3	na	84	3	chr21,+,44317156,44326949	NA	NA	ENST00000354250	ENST00000398198	0	0	0	0	0	0
154915	other	ENSG00000078114	NEBL	na	159	0	chr10,-,21101868,21250600	NA	NA	ENST00000430741	ENST00000377159	84	0	10	0	0	0
154916	other	ENSG00000078114	NEBL	na	8	4	chr10,-,21102971,21104553	NA	NA	ENST00000430741	ENST00000377122	5	11	312	662	0	0
114470	AFE	ENSG00000069869	NEDD4	coding	12	1	chr15,-,56155276,56161776	NA	NA	ENST00000338963	ENST00000164316	0	0	11	2	1	14
139136	ALE	ENSG00000137601	NEK1	coding	12	214	chr4,-,170315673,170321375	NA	NA	ENST00000379072	ENST00000439128	13	0	0	0	0	0
111627	AFE	ENSG00000184613	NELL2	coding	16	0	chr12,-,45269682,45270076	NA	NA	ENST00000437801	ENST00000452445	3	0	0	0	0	0
106876	AFE	ENSG00000173848	NET1	coding	14	5	chr10,+,5488820,5493792	NA	NA	ENST00000355029	ENST00000380359	31	19	21	12	61	31
113036	ALE	ENSG00000100968	NFATC4	coding	10	0	chr14,+,24839799,24840923	NA	NA	ENST00000413692	ENST00000440487	0	0	0	0	0	0
125315	AFE	ENSG00000116044	NFE2L2	coding	8	0	chr2,-,178098998,178128130	NA	NA	ENST00000397062	ENST00000397063	9	0	19	0	3	0
118427	ALE	ENSG00000141905	NFIC	coding	10	0	chr19,+,3456632,3462749	NA	NA	ENST00000343825	ENST00000269778	0	0	0	0	0	0
150334	ALE	ENSG00000086102	NFX1	coding	34	9	chr9,+,33347114,33347660	NA	NA	ENST00000379540	ENST00000318524	20	26	0	44	4	16
102528	AFE	ENSG00000066136	NFYC	coding	32	0	chr1,+,41175287,41204507	NA	NA	ENST00000372657	ENST00000372651	0	0	0	0	0	0
157540	other	ENSG00000151092	NGLY1	na	10	0	chr3,-,25775472,25777799	NA	NA	ENST00000280700	ENST00000308710	0	0	0	0	0	0
133613	AFE	ENSG00000100138	NHP2L1	coding	364	29	chr22,-,42076367,42078359	NA	NA	ENST00000402458	ENST00000215956	80	8	106	16	15	3
133615	AFE	ENSG00000100138	NHP2L1	coding	225	9	chr22,-,42076367,42084797	NA	NA	ENST00000402458	ENST00000355257	13	0	12	3	7	5
102075	ALE	ENSG00000001461	NIPAL3	coding	21	12	chr1,+,24790609,24792493	NA	NA	ENST00000374399	ENST00000339255	0	0	0	0	0	0
130052	ALE	ENSG00000101198	NKAIN4	coding	32	4	chr20,-,61872857,61873890	NA	NA	ENST00000395316	ENST00000370307	0	4	0	0	0	0
137315	AFE	ENSG00000197885	NKIRAS1	coding	16	0	chr3,-,23952411,23952819	NA	NA	ENST00000443659	ENST00000388759	27	0	0	0	9	0
155667	other	ENSG00000168256	NKIRAS2	na	9	0	chr17,+,40174489,40175671	NA	NA	ENST00000316082	ENST00000393879	0	0	0	0	0	0
153866	AFE	ENSG00000146938	NLGN4X	coding	99	0	chrX,-,6069811,6146581	NA	NA	ENST00000381093	ENST00000381095	0	0	0	0	0	0
116509	AFE	ENSG00000011052	NME2	coding	296	0	chr17,+,49243857,49244187	NA	NA	ENST00000393198	ENST00000393192	7	0	1	0	0	0
116510	AFE	ENSG00000011052	NME2	coding	31	0	chr17,+,49243923,49244187	NA	NA	ENST00000393198	ENST00000393191	0	0	0	0	0	0
116506	ALE	ENSG00000011052	NME2	coding	504	81	chr17,+,49238632,49239088	NA	NA	ENST00000393198	ENST00000013034	9	28	0	8	2	9
132127	ALE	ENSG00000100101	NOL12	coding	15	0	chr22,+,38155270,38155423	NA	NA	ENST00000406386	ENST00000331103	0	0	3	0	0	0
107074	AFE	ENSG00000133678	none	coding	69	10	chr10,+,81838541,81841596	NA	NA	ENST00000411627	ENST00000372274	6	2	0	0	0	0
108998	AFE	ENSG00000148985	none	coding	19	0	chr11,+,3829880,3832479	NA	NA	ENST00000396991	ENST00000278243	0	0	0	0	0	0
109269	AFE	ENSG00000168439	none	coding	327	5	chr11,+,63953741,63960549	NA	NA	ENST00000358794	ENST00000305218	2	12	5	10	6	8
109433	AFE	ENSG00000021300	none	coding	34	1	chr11,+,73358782,73360056	NA	NA	ENST00000354190	ENST00000398494	8	1	0	1	0	0
110521	AFE	ENSG00000198431	none	coding	35	6	chr12,+,104680886,104682708	NA	NA	ENST00000429002	ENST00000388854	0	0	7	0	0	2
113334	AFE	ENSG00000235706	none	coding	14	0	chr14,+,95625371,95645835	NA	NA	ENST00000439999	ENST00000439819	0	0	0	0	1	0
114866	AFE	ENSG00000167965	none	coding	455	0	chr16,+,2255875,2256031	NA	NA	ENST00000301724	ENST00000397124	2	0	0	0	0	0
116393	AFE	ENSG00000188554	none	coding	21	2	chr17,+,41323318,41327807	NA	NA	ENST00000389312	ENST00000341165	9	0	23	1	2	1
116689	AFE	ENSG00000184640	none	coding	116	29	chr17,+,75369633,75398140	NA	NA	ENST00000427177	ENST00000423034	0	1	0	4	0	4
116703	AFE	ENSG00000184640	none	coding	11	0	chr17,+,75446867,75478225	NA	NA	ENST00000427177	ENST00000431235	0	0	0	0	0	0
117258	AFE	ENSG00000168259	none	coding	16	22	chr17,-,40152587,40169057	NA	NA	ENST00000457167	ENST00000426588	0	0	0	0	0	0
117871	AFE	ENSG00000049759	none	coding	167	31	chr18,+,55833092,55912658	NA	NA	ENST00000256832	ENST00000256830	15	19	0	0	10	2
118213	AFE	ENSG00000183401	none	coding	13	0	chr19,+,11457302,11460329	NA	NA	ENST00000427879	ENST00000458408	0	0	0	0	0	0
118698	AFE	ENSG00000213889	none	coding	14	0	chr19,+,46002982,46003206	NA	NA	ENST00000396734	ENST00000396735	0	0	0	0	0	0
119047	AFE	ENSG00000204517	none	coding	17	2	chr19,+,58341931,58350390	NA	NA	ENST00000376209	ENST00000442832	0	0	0	0	0	2
121051	AFE	ENSG00000091436	none	coding	8	0	chr2,+,173940729,173955725	NA	NA	ENST00000409176	ENST00000338983	8	0	11	12	1	2
121447	AFE	ENSG00000196141	none	coding	77	0	chr2,+,201171644,201194153	NA	NA	ENST00000444012	ENST00000409140	17	0	21	0	10	0
121467	AFE	ENSG00000196141	none	coding	122	7	chr2,+,201194202,201253945	NA	NA	ENST00000409151	ENST00000358677	21	1	22	1	34	0
124900	AFE	ENSG00000168288	none	coding	490	151	chr2,-,150438784,150443602	NA	NA	ENST00000375738	ENST00000303319	52	145	65	60	36	33
129349	AFE	ENSG00000225377	none	coding	19	1	chr20,-,303208,305785	NA	NA	ENST00000442637	ENST00000414676	0	0	2	0	0	0
138982	AFE	ENSG00000145348	none	coding	105	0	chr4,-,107230145,107237087	NA	NA	ENST00000273980	ENST00000361687	7	0	10	0	2	0
141585	AFE	ENSG00000204564	none	coding	19	0	chr6,+,30615079,30617334	NA	NA	ENST00000446773	ENST00000376473	2	0	0	0	0	0
141650	AFE	ENSG00000204498	none	coding	11	2	chr6,+,31514749,31515939	NA	NA	ENST00000376148	ENST00000376146	0	0	0	0	0	0
141731	AFE	ENSG00000204435	none	coding	358	70	chr6,+,31633984,31634597	NA	NA	ENST00000375885	ENST00000375873	0	0	0	0	0	0
141854	AFE	ENSG00000204256	none	coding	53	8	chr6,+,32936832,32939371	NA	NA	ENST00000395289	ENST00000374825	0	0	0	0	0	0
142496	AFE	ENSG00000237742	none	coding	26	0	chr6,-,126041651,126066046	NA	NA	ENST00000451660	ENST00000427852	0	0	0	0	0	0
143058	AFE	ENSG00000198563	none	coding	29	0	chr6,-,31500687,31502262	NA	NA	ENST00000417556	ENST00000417023	0	0	0	0	0	0
143117	AFE	ENSG00000204463	none	coding	19	4	chr6,-,31619552,31619642	NA	NA	ENST00000404765	ENST00000433828	0	0	0	0	0	0
143146	AFE	ENSG00000204463	none	coding	188	11	chr6,-,31619552,31620023	NA	NA	ENST00000404765	ENST00000375976	4	2	4	0	0	4
143200	AFE	ENSG00000204356	none	coding	213	0	chr6,-,31926230,31926668	NA	NA	ENST00000375425	ENST00000375429	2	0	10	0	4	0
143221	AFE	ENSG00000204310	none	coding	113	0	chr6,-,32139281,32143590	NA	NA	ENST00000395497	ENST00000375107	4	1	2	1	1	0
143224	AFE	ENSG00000204310	none	coding	24	4	chr6,-,32139281,32144286	NA	NA	ENST00000395497	ENST00000395499	0	0	0	0	0	1
143226	AFE	ENSG00000204310	none	coding	8	1	chr6,-,32139281,32145010	NA	NA	ENST00000395497	ENST00000375104	0	0	0	0	0	0
143280	AFE	ENSG00000204257	none	coding	40	1	chr6,-,32918579,32920725	NA	NA	ENST00000456800	ENST00000374841	0	0	6	0	5	0
144144	AFE	ENSG00000230316	none	coding	21	0	chr7,+,121945240,121945341	NA	NA	ENST00000428449	ENST00000437317	0	0	0	0	0	0
151791	AFE	ENSG00000223546	none	coding	18	0	chrX,+,102094899,102100784	NA	NA	ENST00000440496	ENST00000416381	3	0	0	0	0	0
153536	AFE	ENSG00000182712	none	coding	32	7	chrX,-,154292307,154298968	NA	NA	ENST00000369480	ENST00000369484	16	0	74	18	17	17
153967	AFE	ENSG00000230590	none	coding	10	0	chrX,-,73501682,73512003	NA	NA	ENST00000429124	ENST00000418855	1	0	11	2	12	0
153969	AFE	ENSG00000230590	none	coding	18	1	chrX,-,73501682,73513186	NA	NA	ENST00000429124	ENST00000430772	8	0	0	11	0	0
100200	ALE	ENSG00000226419	none	coding	45	8	chr1,+,113503196,113506593	NA	NA	ENST00000428411	ENST00000416193	0	0	0	0	0	0
104672	ALE	ENSG00000214796	none	coding	14	3	chr1,-,202827291,202828009	NA	NA	ENST00000443294	ENST00000430114	0	0	0	0	0	0
104828	ALE	ENSG00000198468	none	coding	15	4	chr1,-,213030513,213031107	NA	NA	ENST00000356684	ENST00000426161	0	0	4	0	0	0
105065	ALE	ENSG00000236810	none	coding	12	1	chr1,-,24098372,24098600	NA	NA	ENST00000427796	ENST00000447961	0	0	0	0	0	0
108377	ALE	ENSG00000223482	none	coding	9	1	chr10,-,88998605,89005871	NA	NA	ENST00000446751	ENST00000433530	0	0	0	0	0	0
108383	ALE	ENSG00000223482	none	coding	14	2	chr10,-,89079955,89086386	NA	NA	ENST00000446751	ENST00000417860	0	1	11	0	0	0
108385	ALE	ENSG00000223482	none	coding	8	0	chr10,-,89084864,89086386	NA	NA	ENST00000446751	ENST00000458739	0	0	0	0	0	0
108487	ALE	ENSG00000226688	none	coding	23	0	chr10,-,97635422,97636274	NA	NA	ENST00000416301	ENST00000414006	0	0	0	4	0	0
111970	ALE	ENSG00000166130	none	coding	10	9	chr12,-,99008117,99028073	NA	NA	ENST00000299157	ENST00000342502	11	1	0	5	2	0
112683	ALE	ENSG00000234787	none	coding	20	6	chr13,-,54698889,54701414	NA	NA	ENST00000423442	ENST00000427299	0	0	0	0	0	0
115483	ALE	ENSG00000166676	none	coding	15	1	chr16,-,10862957,10864128	NA	NA	ENST00000456096	ENST00000299866	0	0	0	0	0	0
116501	ALE	ENSG00000108848	none	coding	97	0	chr17,+,48814386,48814647	NA	NA	ENST00000240304	ENST00000311571	0	0	11	0	0	0
118435	ALE	ENSG00000089335	none	coding	18	0	chr19,+,35174142,35175156	NA	NA	ENST00000221282	ENST00000423823	12	5	8	1	10	10
119376	ALE	ENSG00000232677	none	coding	173	0	chr19,-,36806971,36812201	NA	NA	ENST00000438368	ENST00000412740	1	0	0	0	0	0
121054	ALE	ENSG00000091436	none	coding	21	0	chr2,+,174081977,174085877	NA	NA	ENST00000409176	ENST00000338983	0	0	19	0	1	0
123432	ALE	ENSG00000218739	none	coding	1907	185	chr2,+,37428868,37429005	NA	NA	ENST00000397064	ENST00000397226	19	33	47	13	6	0
123434	ALE	ENSG00000218739	none	coding	11	2	chr2,+,37428868,37430392	NA	NA	ENST00000397064	ENST00000406711	0	0	0	0	0	0
123435	ALE	ENSG00000218739	none	coding	75	4	chr2,+,37428868,37431446	NA	NA	ENST00000397064	ENST00000392061	6	0	0	0	0	0
124270	ALE	ENSG00000204693	none	coding	21	0	chr2,+,97810282,97810376	NA	NA	ENST00000455519	ENST00000289105	11	0	7	0	2	0
127985	ALE	ENSG00000186854	none	coding	16	1	chr2,-,85065364,85066272	NA	NA	ENST00000409520	ENST00000409133	0	0	0	0	0	0
134994	ALE	ENSG00000225548	none	coding	12	3	chr3,+,27866238,27901577	NA	NA	ENST00000414382	ENST00000455984	0	0	0	0	0	0
137269	ALE	ENSG00000214135	none	coding	40	10	chr3,-,197340188,197342434	NA	NA	ENST00000418868	ENST00000414207	0	31	0	0	0	2
139121	ALE	ENSG00000007062	none	coding	191	1	chr4,-,15972704,15981017	NA	NA	ENST00000265014	ENST00000447510	4	0	0	0	3	0
141502	ALE	ENSG00000204642	none	coding	9	1	chr6,+,29693819,29694179	NA	NA	ENST00000259951	ENST00000334668	0	0	3	0	7	0
141808	ALE	ENSG00000221988	none	coding	35	0	chr6,+,32130398,32132355	NA	NA	ENST00000361568	ENST00000421600	0	0	0	0	0	0
144385	ALE	ENSG00000229153	none	coding	13	1	chr7,+,143112291,143112629	NA	NA	ENST00000429289	ENST00000421648	0	0	0	0	0	0
148146	ALE	ENSG00000214293	none	coding	37	16	chr7,-,77314644,77325212	NA	NA	ENST00000440088	ENST00000398043	0	6	0	0	3	2
151244	ALE	ENSG00000236404	none	coding	41	20	chr9,-,2536014,2536358	NA	NA	ENST00000412595	ENST00000424605	0	0	1	9	0	0
154685	other	ENSG00000214837	none	na	49	0	chr1,-,243229542,243230114	NA	NA	ENST00000435840	ENST00000413762	0	1	0	0	0	0
154722	other	ENSG00000182109	none	na	10	0	chr1,-,39988176,39994726	NA	NA	ENST00000331856	ENST00000417869	2	0	0	0	0	0
155281	other	ENSG00000177359	none	na	9	2	chr12,-,31269402,31270353	NA	NA	ENST00000266524	ENST00000398769	0	0	0	0	0	0
155337	other	ENSG00000170919	none	na	12	0	chr13,+,45951349,45955207	NA	NA	ENST00000400416	ENST00000434849	0	0	0	0	0	0
155441	other	ENSG00000213920	none	na	9	0	chr14,-,24683356,24683751	NA	NA	ENST00000288087	ENST00000396833	7	0	6	0	0	0
155549	other	ENSG00000237515	none	na	24	0	chr16,+,12996483,13002335	NA	NA	ENST00000415703	ENST00000423335	4	0	0	0	0	0
155822	other	ENSG00000105393	none	na	480	0	chr19,+,17384993,17386609	NA	NA	ENST00000300965	ENST00000359435	7	0	3	0	0	0
156102	other	ENSG00000223960	none	na	21	0	chr2,+,179278839,179291092	NA	NA	ENST00000436616	ENST00000415236	0	8	7	0	0	0
156755	other	ENSG00000223891	none	na	9	1	chr20,+,42843642,42846006	NA	NA	ENST00000437730	ENST00000435163	0	0	0	0	0	0
156985	other	ENSG00000230513	none	na	22	1	chr22,+,21357117,21357206	NA	NA	ENST00000452284	ENST00000429962	0	0	0	0	0	0
157457	other	ENSG00000225733	none	na	13	0	chr3,-,14987660,14989519	NA	NA	ENST00000424349	ENST00000426200	0	0	0	0	0	0
157863	other	ENSG00000236673	none	na	15	0	chr6,+,132223290,132225086	NA	NA	ENST00000454596	ENST00000421310	0	0	0	0	0	0
158138	other	ENSG00000229043	none	na	11	0	chr7,+,1200258,1201987	NA	NA	ENST00000423008	ENST00000413706	3	0	0	0	0	0
158477	other	ENSG00000179406	none	na	10	5	chr7,-,65855236,65860865	NA	NA	ENST00000421767	ENST00000416572	0	0	0	0	0	0
158804	other	ENSG00000134602	none	na	12	2	chrX,+,131206388,131206993	NA	NA	ENST00000370887	ENST00000361307	0	0	0	0	0	0
158821	other	ENSG00000235703	none	na	11	0	chrX,+,149129166,149130801	NA	NA	ENST00000449111	ENST00000444489	0	10	0	0	0	0
128402	ALE	ENSG00000101361	NOP56	coding	240	86	chr20,+,2637863,2638018	NA	NA	ENST00000329276	ENST00000381169	0	5	0	0	0	0
113519	ALE	ENSG00000139910	NOVA1	coding	104	12	chr14,-,26939695,26941525	NA	NA	ENST00000449198	ENST00000344429	4	28	0	0	0	0
113053	ALE	ENSG00000151322	NPAS3	coding	18	0	chr14,+,34145590,34149808	NA	NA	ENST00000356141	ENST00000341321	0	0	0	0	0	0
113656	ALE	ENSG00000119655	NPC2	coding	653	74	chr14,-,74946990,74947404	NA	NA	ENST00000434013	ENST00000238633	15	10	19	3	8	0
117684	AFE	ENSG00000182446	NPLOC4	coding	451	0	chr17,-,79596830,79603941	NA	NA	ENST00000374747	ENST00000331134	104	0	76	0	39	0
139901	ALE	ENSG00000181163	NPM1P21	coding	436	24	chr5,+,170832406,170833400	NA	NA	ENST00000296930	ENST00000393820	10	0	0	0	10	12
109073	AFE	ENSG00000025434	NR1H3	coding	10	1	chr11,+,47270549,47281341	NA	NA	ENST00000298843	ENST00000395397	0	0	0	0	1	0
109075	AFE	ENSG00000025434	NR1H3	coding	20	0	chr11,+,47280809,47281341	NA	NA	ENST00000298843	ENST00000344715	0	0	0	0	4	1
111960	ALE	ENSG00000120798	NR2C1	coding	13	3	chr12,-,95424404,95425124	NA	NA	ENST00000333003	ENST00000393101	0	0	0	0	0	0
134298	AFE	ENSG00000177463	NR2C2	coding	9	0	chr3,+,15003998,15045382	NA	NA	ENST00000323373	ENST00000393102	1	0	0	0	0	0
148839	AFE	ENSG00000157168	NRG1	coding	11	0	chr8,+,32505902,32585466	NA	NA	ENST00000338921	ENST00000287838	0	19	0	0	0	0
110468	ALE	ENSG00000175352	NRIP3	coding	13	0	chr11,-,9005106,9005421	NA	NA	ENST00000396639	ENST00000309166	36	2	0	0	0	0
139940	AFE	ENSG00000165671	NSD1	coding	17	0	chr5,+,176560154,176562087	NA	NA	ENST00000439151	ENST00000354179	0	0	0	0	0	0
156794	other	ENSG00000088833	NSFL1C	na	14	1	chr20,-,1435681,1438844	NA	NA	ENST00000381653	ENST00000350991	0	3	0	0	0	0
149433	AFE	ENSG00000035681	NSMAF	coding	22	4	chr8,-,59555631,59572131	NA	NA	ENST00000427130	ENST00000038176	0	18	1	2	0	0
138199	AFE	ENSG00000168268	NT5DC2	coding	8	0	chr3,-,52563349,52568548	NA	NA	ENST00000422318	ENST00000307076	0	0	0	0	0	0
139041	AFE	ENSG00000170917	NUDT6	coding	30	6	chr4,-,123838858,123843955	NA	NA	ENST00000304430	ENST00000339154	0	0	0	0	0	0
140753	AFE	ENSG00000113569	NUP155	coding	21	0	chr5,-,37364485,37370767	NA	NA	ENST00000231498	ENST00000381843	86	9	0	0	0	0
151869	AFE	ENSG00000101888	NXT2	coding	16	0	chrX,+,108780498,108781273	NA	NA	ENST00000218004	ENST00000343061	0	0	0	0	5	0
101891	AFE	ENSG00000154358	OBSCN	coding	40	0	chr1,+,228465366,228465454	NA	NA	ENST00000422127	ENST00000366706	0	0	3	0	0	0
154369	other	ENSG00000154358	OBSCN	na	74	2	chr1,+,228540762,228543851	NA	NA	ENST00000422127	ENST00000284548	1	0	36	0	0	0
126238	ALE	ENSG00000124006	OBSL1	coding	134	63	chr2,-,220426729,220427123	NA	NA	ENST00000404537	ENST00000289656	7	21	2	7	9	10
140139	AFE	ENSG00000197822	OCLN	coding	115	0	chr5,+,68788726,68800003	NA	NA	ENST00000355237	ENST00000380766	0	0	0	0	18	0
152052	ALE	ENSG00000046651	OFD1	coding	10	2	chrX,+,13769486,13770822	NA	NA	ENST00000340096	ENST00000398395	0	16	0	11	0	5
158229	other	ENSG00000105953	OGDH	na	20	0	chr7,+,44685116,44687042	NA	NA	ENST00000444676	ENST00000442187	0	22	0	0	0	1
136098	ALE	ENSG00000114026	OGG1	coding	13	0	chr3,+,9798499,9798744	NA	NA	ENST00000302036	ENST00000339542	0	1	0	0	0	1
125222	AFE	ENSG00000138430	OLA1	coding	425	0	chr2,-,175111542,175113179	NA	NA	ENST00000409546	ENST00000284719	169	0	84	0	40	0
150149	AFE	ENSG00000130558	OLFM1	coding	121	2	chr9,+,137967647,137982040	NA	NA	ENST00000371793	ENST00000252854	4	0	0	0	0	0
150153	ALE	ENSG00000130558	OLFM1	coding	30	6	chr9,+,137987864,137989626	NA	NA	ENST00000371793	ENST00000277415	319	345	0	0	4	2
119605	ALE	ENSG00000125741	OPA3	coding	32	3	chr19,-,46057168,46087880	NA	NA	ENST00000323060	ENST00000263275	0	0	0	0	2	1
106403	AFE	ENSG00000123240	OPTN	coding	13	0	chr10,+,13142301,13150137	NA	NA	ENST00000263036	ENST00000378747	0	3	0	2	0	1
110296	ALE	ENSG00000149716	ORAOV1	coding	42	4	chr11,-,69482354,69482662	NA	NA	ENST00000376587	ENST00000279147	0	12	0	0	0	8
124893	AFE	ENSG00000115947	ORC4L	coding	14	0	chr2,-,148733543,148739496	NA	NA	ENST00000264169	ENST00000457954	39	6	30	0	13	0
124896	AFE	ENSG00000115947	ORC4L	coding	8	13	chr2,-,148733543,148778176	NA	NA	ENST00000264169	ENST00000392858	2	0	8	0	0	0
124898	AFE	ENSG00000115947	ORC4L	coding	128	0	chr2,-,148733543,148778201	NA	NA	ENST00000264169	ENST00000392857	51	3	11	0	0	1
117996	AFE	ENSG00000141447	OSBPL1A	coding	27	0	chr18,-,21819345,21851585	NA	NA	ENST00000319481	ENST00000399443	41	1	12	1	4	0
155308	other	ENSG00000091039	OSBPL8	na	46	3	chr12,-,76844758,76881289	NA	NA	ENST00000261183	ENST00000393249	20	2	8	18	29	18
102775	AFE	ENSG00000117859	OSBPL9	coding	56	2	chr1,+,52195672,52211207	NA	NA	ENST00000447887	ENST00000361556	0	0	0	0	0	4
102776	AFE	ENSG00000117859	OSBPL9	coding	50	0	chr1,+,52195795,52211207	NA	NA	ENST00000447887	ENST00000451752	0	0	0	1	2	0
148600	AFE	ENSG00000164830	OXR1	coding	8	0	chr8,+,107738536,107751685	NA	NA	ENST00000445937	ENST00000449762	43	36	5	4	2	2
154967	other	ENSG00000122884	P4HA1	na	329	6	chr10,-,74790127,74803644	NA	NA	ENST00000307116	ENST00000263556	4	0	0	25	0	25
157809	other	ENSG00000072682	P4HA2	na	45	0	chr5,-,131531172,131534013	NA	NA	ENST00000401867	ENST00000360568	0	0	7	4	0	0
110987	ALE	ENSG00000170515	PA2G4	coding	112	127	chr12,+,56505312,56506606	NA	NA	ENST00000417031	ENST00000303305	0	5	2	3	0	9
109437	AFE	ENSG00000175575	PAAF1	coding	20	0	chr11,+,73598143,73598398	NA	NA	ENST00000310571	ENST00000376384	13	0	0	0	0	0
140775	AFE	ENSG00000172239	PAIP1	coding	10	0	chr5,-,43556100,43557441	NA	NA	ENST00000306846	ENST00000338972	4	0	5	0	0	0
138599	AFE	ENSG00000129116	PALLD	coding	8	0	chr4,+,169799544,169812072	NA	NA	ENST00000261509	ENST00000335742	0	0	3	0	0	0
149618	AFE	ENSG00000157654	PALM2	coding	9	0	chr9,+,112811134,112898406	NA	NA	ENST00000374530	ENST00000374525	0	0	0	0	0	0
111784	AFE	ENSG00000135473	PAN2	coding	29	0	chr12,-,56726991,56727645	NA	NA	ENST00000425394	ENST00000257931	2	6	0	0	3	0
107817	ALE	ENSG00000148498	PARD3	coding	385	84	chr10,-,34601309,34606034	NA	NA	ENST00000374789	ENST00000340077	9	0	0	0	13	4
133156	ALE	ENSG00000100105	PATZ1	coding	50	2	chr22,-,31737668,31738882	NA	NA	ENST00000266269	ENST00000215919	0	0	2	0	1	0
109914	AFE	ENSG00000007372	PAX6	coding	13	1	chr11,-,31832562,31832662	NA	NA	ENST00000419022	ENST00000379123	0	0	0	0	0	0
111988	AFE	ENSG00000175198	PCCA	coding	17	0	chr13,+,100958087,100959445	NA	NA	ENST00000376285	ENST00000376254	0	0	0	0	1	0
157665	other	ENSG00000169851	PCDH7	na	108	3	chr4,+,30726217,30732374	NA	NA	ENST00000333135	ENST00000361762	0	0	0	0	0	0
139730	AFE	ENSG00000081842	PCDHA12	coding	127	0	chr5,+,140251078,140358533	NA	NA	ENST00000289269	ENST00000398640	0	0	0	0	0	0
139733	AFE	ENSG00000081842	PCDHA12	coding	12	0	chr5,+,140257423,140358533	NA	NA	ENST00000289269	ENST00000398631	0	0	0	0	0	0
139771	AFE	ENSG00000081853	PCDHGB7	coding	62	1	chr5,+,140799840,140874373	NA	NA	ENST00000252087	ENST00000398594	0	2	0	0	0	0
139775	AFE	ENSG00000081853	PCDHGB7	coding	23	0	chr5,+,140803226,140874373	NA	NA	ENST00000252087	ENST00000398587	0	0	0	0	0	0
139781	AFE	ENSG00000081853	PCDHGB7	coding	58	0	chr5,+,140867181,140874373	NA	NA	ENST00000252087	ENST00000306593	0	0	0	0	0	0
107175	ALE	ENSG00000180628	PCGF5	coding	17	1	chr10,+,92982739,92987093	NA	NA	ENST00000336126	ENST00000371687	0	0	6	0	0	0
150552	ALE	ENSG00000099139	PCSK5	coding	13	0	chr9,+,78804661,78808152	NA	NA	ENST00000376754	ENST00000376752	0	0	5	0	0	0
152572	AFE	ENSG00000102225	PCTK1	coding	26	0	chrX,+,47078503,47082950	NA	NA	ENST00000457458	ENST00000357227	7	0	3	0	4	0
155178	other	ENSG00000177225	PDDC1	na	92	0	chr11,-,771103,771332	NA	NA	ENST00000397472	ENST00000319863	1	2	0	0	0	0
119268	AFE	ENSG00000105650	PDE4C	coding	13	0	chr19,-,18333132,18335044	NA	NA	ENST00000355502	ENST00000447275	0	0	0	0	0	0
103751	AFE	ENSG00000178104	PDE4DIP	coding	38	8	chr1,-,144923820,144930583	NA	NA	ENST00000369356	ENST00000313431	21	60	0	13	12	60
124460	AFE	ENSG00000143870	PDIA6	coding	968	6	chr2,-,10942765,10952803	NA	NA	ENST00000381611	ENST00000272227	39	8	27	1	87	3
138896	ALE	ENSG00000163110	PDLIM5	coding	24	1	chr4,+,95507594,95508139	NA	NA	ENST00000317968	ENST00000318007	6	0	646	162	4	0
140672	ALE	ENSG00000196923	PDLIM7	coding	40	7	chr5,-,176917593,176917870	NA	NA	ENST00000355841	ENST00000355572	0	0	0	0	0	0
142329	ALE	ENSG00000164494	PDSS2	coding	21	6	chr6,-,107585715,107595232	NA	NA	ENST00000369037	ENST00000369031	0	0	0	0	0	0
123754	ALE	ENSG00000162928	PEX13	coding	15	0	chr2,+,61244985,61245318	NA	NA	ENST00000295030	ENST00000401576	0	0	0	0	0	0
141148	ALE	ENSG00000112357	PEX7	coding	11	0	chr6,+,137147606,137151144	NA	NA	ENST00000318471	ENST00000367756	0	0	0	0	0	0
110897	AFE	ENSG00000152556	PFKM	coding	255	12	chr12,+,48513188,48516549	NA	NA	ENST00000340802	ENST00000359794	31	18	256	67	3	0
106659	ALE	ENSG00000067057	PFKP	coding	8	4	chr10,+,3178029,3179734	NA	NA	ENST00000381125	ENST00000381188	0	0	0	0	0	0
107999	ALE	ENSG00000225830	PGBD3	coding	8	4	chr10,-,50725166,50732078	NA	NA	ENST00000355832	ENST00000342592	0	0	10	9	4	1
105004	AFE	ENSG00000177614	PGBD5	coding	17	0	chr1,-,230493066,230561343	NA	NA	ENST00000321327	ENST00000391860	1	0	0	0	0	0
102924	AFE	ENSG00000079739	PGM1	coding	77	6	chr1,+,64059404,64095095	NA	NA	ENST00000371083	ENST00000371084	0	0	4	0	2	0
143711	AFE	ENSG00000013375	PGM3	coding	88	17	chr6,-,83900732,83902897	NA	NA	ENST00000416472	ENST00000283977	0	0	0	5	13	4
102230	AFE	ENSG00000204138	PHACTR4	coding	49	3	chr1,+,28733973,28785595	NA	NA	ENST00000373836	ENST00000373839	0	0	0	0	0	0
143983	ALE	ENSG00000106443	PHF14	coding	14	5	chr7,+,11101711,11142112	NA	NA	ENST00000303905	ENST00000403050	0	59	5	0	0	12
152555	AFE	ENSG00000102221	PHF16	coding	36	0	chrX,+,46772153,46844284	NA	NA	ENST00000397189	ENST00000218343	0	0	1	0	1	0
153842	AFE	ENSG00000172943	PHF8	coding	50	0	chrX,-,54069252,54070194	NA	NA	ENST00000357988	ENST00000338154	1	0	0	0	3	0
115103	AFE	ENSG00000102893	PHKB	coding	126	16	chr16,+,47699942,47703125	NA	NA	ENST00000323584	ENST00000427582	26	69	55	35	12	18
155587	other	ENSG00000102893	PHKB	na	202	8	chr16,+,47697644,47699852	NA	NA	ENST00000323584	ENST00000299167	45	24	50	9	10	0
133967	AFE	ENSG00000144824	PHLDB2	coding	11	0	chr3,+,111578724,111602910	NA	NA	ENST00000431670	ENST00000273356	0	0	44	6	0	1
107558	AFE	ENSG00000107537	PHYH	coding	30	0	chr10,-,13340244,13341967	NA	NA	ENST00000378659	ENST00000263038	8	0	4	0	35	0
118073	ALE	ENSG00000078043	PIAS2	coding	120	29	chr18,-,44398409,44400895	NA	NA	ENST00000398654	ENST00000324794	11	19	12	1	0	0
100456	AFE	ENSG00000131788	PIAS3	coding	58	25	chr1,+,145575403,145578061	NA	NA	ENST00000393045	ENST00000393046	0	0	0	0	0	0
110437	ALE	ENSG00000073921	PICALM	coding	505	67	chr11,-,85670102,85685750	NA	NA	ENST00000393343	ENST00000341783	34	275	29	43	42	87
151340	AFE	ENSG00000165282	PIGO	coding	18	1	chr9,-,35095562,35095875	NA	NA	ENST00000341666	ENST00000298004	0	0	0	0	0	0
134854	AFE	ENSG00000163964	PIGX	coding	11	0	chr3,+,196439994,196443728	NA	NA	ENST00000296333	ENST00000415832	12	1	3	0	0	0
103291	AFE	ENSG00000171608	PIK3CD	coding	28	0	chr1,+,9751628,9770481	NA	NA	ENST00000361110	ENST00000377346	0	0	0	1	4	0
140117	AFE	ENSG00000145675	PIK3R1	coding	33	0	chr5,+,67584578,67588086	NA	NA	ENST00000396611	ENST00000320694	65	1	1	0	78	0
105575	AFE	ENSG00000117461	PIK3R3	coding	58	2	chr1,-,46546421,46597518	NA	NA	ENST00000340332	ENST00000262741	58	32	125	5	0	0
117119	ALE	ENSG00000141720	PIP4K2B	coding	12	0	chr17,-,36932877,36933939	NA	NA	ENST00000269554	ENST00000311500	0	0	0	0	0	0
157150	other	ENSG00000180957	PITPNB	na	74	0	chr22,-,28292621,28293788	NA	NA	ENST00000320996	ENST00000438464	40	0	26	0	9	0
114574	AFE	ENSG00000067225	PKM2	coding	1309	0	chr15,-,72511450,72523456	NA	NA	ENST00000419739	ENST00000335181	34	0	33	0	2	0
155542	other	ENSG00000067225	PKM2	na	149	5	chr15,-,72492995,72494794	NA	NA	ENST00000419739	ENST00000335181	0	2	1	0	0	0
115666	ALE	ENSG00000127564	PKMYT1	coding	214	4	chr16,-,3023064,3023138	NA	NA	ENST00000431515	ENST00000262300	0	0	0	0	0	0
118264	AFE	ENSG00000123143	PKN1	coding	93	0	chr19,+,14544353,14551954	NA	NA	ENST00000342216	ENST00000242783	0	0	1	0	0	0
155487	other	ENSG00000168970	PLA2G4B	na	26	0	chr15,+,42128748,42128978	NA	NA	ENST00000382448	ENST00000335032	0	0	0	0	0	0
129185	ALE	ENSG00000182621	PLCB1	coding	10	12	chr20,+,8630095,8632059	NA	NA	ENST00000338037	ENST00000404098	0	10	0	0	0	0
137519	AFE	ENSG00000187091	PLCD1	coding	8	0	chr3,-,38061842,38070996	NA	NA	ENST00000434171	ENST00000334661	0	0	0	0	0	0
136630	AFE	ENSG00000114805	PLCH1	coding	155	0	chr3,-,155314166,155421934	NA	NA	ENST00000340059	ENST00000334686	0	0	0	0	0	0
155850	other	ENSG00000105223	PLD3	na	9	0	chr19,+,40871491,40872325	NA	NA	ENST00000409735	ENST00000356508	0	0	0	0	0	0
149249	AFE	ENSG00000178209	PLEC1	coding	46	0	chr8,-,145012859,145027893	NA	NA	ENST00000322810	ENST00000354958	3	0	4	0	1	0
149250	AFE	ENSG00000178209	PLEC1	coding	15	0	chr8,-,145012859,145047570	NA	NA	ENST00000322810	ENST00000356346	3	0	3	0	2	0
149251	AFE	ENSG00000178209	PLEC1	coding	8	0	chr8,-,145012859,145049344	NA	NA	ENST00000322810	ENST00000357316	0	0	0	0	0	0
120601	ALE	ENSG00000115762	PLEKHB2	coding	159	0	chr2,+,131890563,131897739	NA	NA	ENST00000404460	ENST00000403716	1	0	0	0	0	0
120602	ALE	ENSG00000115762	PLEKHB2	coding	46	13	chr2,+,131890563,131897742	NA	NA	ENST00000404460	ENST00000234115	2	6	0	1	0	2
118398	AFE	ENSG00000166289	PLEKHF1	coding	10	0	chr19,+,30156411,30164730	NA	NA	ENST00000436066	ENST00000299373	0	0	0	0	1	0
105762	AFE	ENSG00000171680	PLEKHG5	coding	64	0	chr1,-,6537717,6545895	NA	NA	ENST00000377748	ENST00000400913	0	0	0	0	0	0
151827	AFE	ENSG00000123560	PLP1	coding	39	49	chrX,+,103029290,103031780	NA	NA	ENST00000418604	ENST00000434483	0	0	0	0	0	0
137858	AFE	ENSG00000164050	PLXNB1	coding	19	0	chr3,-,48466741,48470661	NA	NA	ENST00000296440	ENST00000358459	0	0	2	0	0	0
114092	ALE	ENSG00000140464	PML	coding	27	4	chr15,+,74326870,74327512	NA	NA	ENST00000268058	ENST00000268059	0	0	0	0	0	0
122005	AFE	ENSG00000127838	PNKD	coding	31	0	chr2,+,219188153,219204505	NA	NA	ENST00000273077	ENST00000258362	0	0	2	0	7	1
142299	AFE	ENSG00000146278	PNRC1	coding	9	0	chr6,+,89792453,89793471	NA	NA	ENST00000336032	ENST00000354922	0	0	0	0	0	0
103959	AFE	ENSG00000143442	POGZ	coding	11	0	chr1,-,151414680,151414780	NA	NA	ENST00000271715	ENST00000439756	0	0	0	0	0	0
155272	other	ENSG00000177084	POLE	na	59	1	chr12,-,133249862,133250160	NA	NA	ENST00000455752	ENST00000320574	0	0	0	8	0	4
112186	ALE	ENSG00000186184	POLR1D	coding	65	2	chr13,+,28196145,28222515	NA	NA	ENST00000302979	ENST00000399697	8	0	7	2	0	4
132146	ALE	ENSG00000100142	POLR2F	coding	581	12	chr22,+,38363176,38363631	NA	NA	ENST00000215960	ENST00000442738	0	0	0	5	2	0
145370	AFE	ENSG00000196313	POM121	coding	28	5	chr7,+,72361648,72396799	NA	NA	ENST00000434423	ENST00000257622	0	0	0	0	0	0
148071	AFE	ENSG00000135213	POM121C	coding	27	1	chr7,-,75070924,75103969	NA	NA	ENST00000257665	ENST00000398379	4	0	0	0	0	0
105581	AFE	ENSG00000085998	POMGNT1	coding	29	0	chr1,-,46663542,46664007	NA	NA	ENST00000371992	ENST00000371984	0	0	8	0	0	0
101081	AFE	ENSG00000143190	POU2F1	coding	262	0	chr1,+,167190194,167301706	NA	NA	ENST00000367862	ENST00000367866	6	0	1	0	2	0
119309	AFE	ENSG00000141934	PPAP2C	coding	28	0	chr19,-,288170,291284	NA	NA	ENST00000327790	ENST00000269812	3	0	0	0	0	0
149350	ALE	ENSG00000147535	PPAPDC1B	coding	8	10	chr8,-,38122466,38123658	NA	NA	ENST00000424479	ENST00000399872	0	0	0	0	0	5
102441	ALE	ENSG00000084072	PPIE	coding	105	15	chr1,+,40218723,40218958	NA	NA	ENST00000372834	ENST00000324379	8	8	0	1	4	0
120918	AFE	ENSG00000138398	PPIG	coding	53	0	chr2,+,170441408,170460151	NA	NA	ENST00000260970	ENST00000414307	10	0	13	0	7	0
102571	AFE	ENSG00000171960	PPIH	coding	10	0	chr1,+,43125040,43125192	NA	NA	ENST00000304979	ENST00000455203	0	0	0	0	0	0
125626	AFE	ENSG00000013441	PPIL3	coding	38	32	chr2,-,201726584,201729286	NA	NA	ENST00000434813	ENST00000321356	7	39	13	35	17	30
113141	AFE	ENSG00000100614	PPM1A	coding	18	1	chr14,+,60716394,60749401	NA	NA	ENST00000325642	ENST00000395075	14	2	2	1	19	5
123577	ALE	ENSG00000138032	PPM1B	coding	101	27	chr2,+,44445675,44459454	NA	NA	ENST00000282412	ENST00000378551	12	26	10	3	0	0
135875	AFE	ENSG00000164088	PPM1M	coding	11	0	chr3,+,52280063,52280710	NA	NA	ENST00000323588	ENST00000457454	0	1	0	1	0	4
149039	AFE	ENSG00000164951	PPM2C	coding	13	0	chr8,+,94929306,94934243	NA	NA	ENST00000396200	ENST00000297598	26	0	16	0	0	0
110270	AFE	ENSG00000172531	PPP1CA	coding	62	5	chr11,-,67168669,67169198	NA	NA	ENST00000451458	ENST00000376745	0	0	2	2	4	2
119600	AFE	ENSG00000104881	PPP1R13L	coding	14	0	chr19,-,45901596,45908256	NA	NA	ENST00000418234	ENST00000360957	0	0	1	0	0	0
122855	ALE	ENSG00000115685	PPP1R7	coding	89	2	chr2,+,242105855,242106459	NA	NA	ENST00000407025	ENST00000401987	0	1	0	2	0	1
145972	AFE	ENSG00000158528	PPP1R9A	coding	13	0	chr7,+,94537450,94539209	NA	NA	ENST00000433360	ENST00000422324	31	2	2	0	0	0
109613	ALE	ENSG00000137713	PPP2R1B	coding	190	45	chr11,-,111612335,111612776	NA	NA	ENST00000311129	ENST00000341980	0	9	19	8	10	19
148813	AFE	ENSG00000221914	PPP2R2A	coding	32	3	chr8,+,26149341,26151181	NA	NA	ENST00000315985	ENST00000380737	0	0	1	0	11	1
140586	AFE	ENSG00000156475	PPP2R2B	coding	35	0	chr5,-,146080704,146236061	NA	NA	ENST00000394414	ENST00000394410	0	0	0	0	0	0
140593	AFE	ENSG00000156475	PPP2R2B	coding	12	0	chr5,-,146257757,146258263	NA	NA	ENST00000394414	ENST00000453001	0	0	0	0	0	0
153632	AFE	ENSG00000167393	PPP2R3B	coding	10	0	chrX,-,322324,334266	NA	NA	ENST00000390665	ENST00000381625	0	0	1	0	0	0
149992	AFE	ENSG00000119383	PPP2R4	coding	27	3	chr9,+,131901927,131904723	NA	NA	ENST00000452489	ENST00000423100	0	0	5	0	0	0
149993	AFE	ENSG00000119383	PPP2R4	coding	380	2	chr9,+,131902429,131904723	NA	NA	ENST00000452489	ENST00000414510	9	0	46	3	9	0
149995	AFE	ENSG00000119383	PPP2R4	coding	14	0	chr9,+,131904360,131904723	NA	NA	ENST00000452489	ENST00000432651	3	0	0	0	0	0
150017	ALE	ENSG00000119383	PPP2R4	coding	523	34	chr9,+,131904830,131909665	NA	NA	ENST00000452489	ENST00000337738	42	21	29	29	11	22
112780	AFE	ENSG00000078304	PPP2R5C	coding	126	7	chr14,+,102276372,102323022	NA	NA	ENST00000328724	ENST00000334743	0	8	0	17	2	1
127564	AFE	ENSG00000221823	PPP3R1	coding	71	6	chr2,-,68444262,68479256	NA	NA	ENST00000432181	ENST00000234310	34	1	6	0	2	0
127560	ALE	ENSG00000221823	PPP3R1	coding	668	17	chr2,-,68408141,68413599	NA	NA	ENST00000432181	ENST00000234310	1041	354	68	25	48	36
150850	AFE	ENSG00000119414	PPP6C	coding	192	40	chr9,-,127933458,127951922	NA	NA	ENST00000451402	ENST00000373547	153	3	75	0	24	1
102032	AFE	ENSG00000121644	PPPDE1	coding	17	78	chr1,+,244816656,244849898	NA	NA	ENST00000346571	ENST00000263831	9	14	0	12	0	0
102033	AFE	ENSG00000121644	PPPDE1	coding	9	0	chr1,+,244817326,244849898	NA	NA	ENST00000346571	ENST00000391840	0	0	0	0	0	0
101319	ALE	ENSG00000040487	PQLC2	coding	9	0	chr1,+,19653116,19654064	NA	NA	ENST00000375153	ENST00000430100	0	0	0	0	0	0
155546	other	ENSG00000198901	PRC1	na	67	12	chr15,-,91510431,91512753	NA	NA	ENST00000394249	ENST00000361919	0	0	0	0	0	0
100317	ALE	ENSG00000116731	PRDM2	coding	62	6	chr1,+,14109325,14113009	NA	NA	ENST00000235372	ENST00000311066	20	0	6	0	11	0
139034	ALE	ENSG00000138738	PRDM5	coding	22	4	chr4,-,121760428,121774572	NA	NA	ENST00000264808	ENST00000394435	0	0	8	0	0	0
105557	AFE	ENSG00000117450	PRDX1	coding	26	6	chr1,-,45984725,45988449	NA	NA	ENST00000262746	ENST00000424390	0	0	0	0	0	0
142318	ALE	ENSG00000085377	PREP	coding	17	9	chr6,-,105770985,105771539	NA	NA	ENST00000369110	ENST00000369104	0	3	8	0	0	0
157946	other	ENSG00000146143	PRIM2	na	224	6	chr6,+,57398316,57467079	NA	NA	ENST00000425433	ENST00000389488	2	0	2	0	2	0
103106	AFE	ENSG00000142875	PRKACB	coding	47	0	chr1,+,84544053,84644859	NA	NA	ENST00000370685	ENST00000370688	15	0	11	0	0	0
103143	ALE	ENSG00000142875	PRKACB	coding	11	6	chr1,+,84668487,84670164	NA	NA	ENST00000370685	ENST00000370684	2	72	0	9	0	0
116599	AFE	ENSG00000108946	PRKAR1A	coding	45	0	chr17,+,66508688,66511534	NA	NA	ENST00000358598	ENST00000392710	13	0	17	0	11	0
148075	AFE	ENSG00000188191	PRKAR1B	coding	15	0	chr7,-,751163,752050	NA	NA	ENST00000406797	ENST00000340920	0	0	0	0	0	0
148087	AFE	ENSG00000188191	PRKAR1B	coding	9	0	chr7,-,751163,766846	NA	NA	ENST00000406797	ENST00000417852	0	0	0	0	0	0
148088	AFE	ENSG00000188191	PRKAR1B	coding	61	3	chr7,-,751163,767226	NA	NA	ENST00000406797	ENST00000403562	0	0	0	0	0	0
147844	ALE	ENSG00000188191	PRKAR1B	coding	28	1	chr7,-,618489,618892	NA	NA	ENST00000406797	ENST00000340920	0	0	0	0	0	0
143887	AFE	ENSG00000128563	PRKRIP1	coding	19	11	chr7,+,102016768,102038066	NA	NA	ENST00000397912	ENST00000437834	0	0	0	0	0	0
118770	AFE	ENSG00000126457	PRMT1	coding	42	13	chr19,+,50183509,50183743	NA	NA	ENST00000351853	ENST00000391849	4	1	1	0	9	1
130619	ALE	ENSG00000160310	PRMT2	coding	15	3	chr21,+,48069650,48072756	NA	NA	ENST00000355680	ENST00000455177	0	0	0	0	0	0
115283	AFE	ENSG00000132600	PRMT7	coding	36	0	chr16,+,68346078,68349799	NA	NA	ENST00000449359	ENST00000339507	5	0	4	0	3	3
132335	AFE	ENSG00000186654	PRR5	coding	16	0	chr22,+,45148506,45182336	NA	NA	ENST00000352766	ENST00000336963	0	0	0	0	0	0
132334	ALE	ENSG00000186654	PRR5	coding	19	0	chr22,+,45131041,45132651	NA	NA	ENST00000352766	ENST00000006251	0	0	0	0	0	0
151528	AFE	ENSG00000106772	PRUNE2	coding	9	0	chr9,-,79270417,79306989	NA	NA	ENST00000376718	ENST00000376717	49	10	0	0	0	0
151185	ALE	ENSG00000164985	PSIP1	coding	621	181	chr9,-,15471228,15472629	NA	NA	ENST00000380733	ENST00000380716	0	54	0	0	2	2
151186	ALE	ENSG00000164985	PSIP1	coding	40	9	chr9,-,15471308,15472629	NA	NA	ENST00000380733	ENST00000380715	4	80	0	0	0	0
109767	AFE	ENSG00000129084	PSMA1	coding	1244	77	chr11,-,14540586,14541842	NA	NA	ENST00000418988	ENST00000249924	10	5	12	5	1	1
105391	ALE	ENSG00000126067	PSMB2	coding	1426	18	chr1,-,36068974,36070833	NA	NA	ENST00000373240	ENST00000373237	69	0	67	2	40	0
155348	other	ENSG00000121390	PSPC1	na	91	14	chr13,-,20251962,20304378	NA	NA	ENST00000338910	ENST00000335781	35	14	2	1	4	1
158470	other	ENSG00000146733	PSPH	na	128	14	chr7,-,56079561,56088811	NA	NA	ENST00000437355	ENST00000366233	62	39	27	16	26	12
105272	ALE	ENSG00000169403	PTAFR	coding	8	0	chr1,-,28477569,28520232	NA	NA	ENST00000430543	ENST00000305392	0	0	0	0	0	0
154701	other	ENSG00000169403	PTAFR	na	8	0	chr1,-,28477569,28520232	NA	NA	ENST00000373857	ENST00000305392	0	0	0	0	0	0
103284	AFE	ENSG00000117569	PTBP2	coding	16	6	chr1,+,97189149,97216980	NA	NA	ENST00000394184	ENST00000236228	1	7	0	0	0	0
150735	AFE	ENSG00000106853	PTGR1	coding	165	2	chr9,-,114359711,114361618	NA	NA	ENST00000407693	ENST00000309195	12	0	9	0	9	5
135542	AFE	ENSG00000160801	PTH1R	coding	25	2	chr3,+,46925123,46935396	NA	NA	ENST00000313063	ENST00000313049	0	0	0	0	0	0
157355	other	ENSG00000160801	PTH1R	na	45	0	chr3,+,46942574,46942903	NA	NA	ENST00000313063	ENST00000313049	0	0	3	0	5	0
122390	AFE	ENSG00000187514	PTMAP4	coding	29	1	chr2,+,232573460,232576057	NA	NA	ENST00000412128	ENST00000341369	7	0	1	0	4	0
128427	ALE	ENSG00000132670	PTPRA	coding	105	37	chr20,+,2967494,2968677	NA	NA	ENST00000358719	ENST00000418580	11	65	1	6	0	7
109124	ALE	ENSG00000149177	PTPRJ	coding	12	3	chr11,+,48152267,48153062	NA	NA	ENST00000418331	ENST00000440289	0	0	0	0	0	0
155749	other	ENSG00000141378	PTRH2	na	200	4	chr17,-,57775338,57784731	NA	NA	ENST00000409433	ENST00000393038	7	6	2	0	1	4
109688	ALE	ENSG00000110400	PVRL1	coding	25	2	chr11,-,119545356,119545868	NA	NA	ENST00000264025	ENST00000340882	0	0	0	5	0	0
118676	ALE	ENSG00000130202	PVRL2	coding	303	0	chr19,+,45377734,45381479	NA	NA	ENST00000252483	ENST00000252485	0	0	0	0	0	0
117687	AFE	ENSG00000183010	PYCR1	coding	10	0	chr17,-,79894736,79895137	NA	NA	ENST00000432920	ENST00000402252	0	0	0	0	0	0
138029	AFE	ENSG00000198218	QRICH1	coding	9	0	chr3,-,49129888,49130687	NA	NA	ENST00000357496	ENST00000424300	0	0	0	0	0	0
157603	other	ENSG00000198218	QRICH1	na	8	0	chr3,-,49114470,49131769	NA	NA	ENST00000357496	ENST00000411682	0	0	0	0	0	0
115129	ALE	ENSG00000090565	RAB11FIP3	coding	10	0	chr16,+,546858,547291	NA	NA	ENST00000262305	ENST00000412256	0	0	0	0	0	0
127842	AFE	ENSG00000135631	RAB11FIP5	coding	37	0	chr2,-,73303309,73306778	NA	NA	ENST00000258098	ENST00000389508	0	0	0	0	0	0
106594	AFE	ENSG00000099246	RAB18	coding	68	30	chr10,+,27793365,27798803	NA	NA	ENST00000375800	ENST00000356940	135	3	155	5	30	9
158158	other	ENSG00000146955	RAB19	na	21	8	chr7,+,140107646,140111673	NA	NA	ENST00000275874	ENST00000356407	0	0	0	0	0	0
116988	AFE	ENSG00000109113	RAB34	coding	11	0	chr17,-,27044308,27045387	NA	NA	ENST00000447716	ENST00000412625	0	0	0	0	0	0
116646	AFE	ENSG00000172794	RAB37	coding	10	0	chr17,+,72733503,72736906	NA	NA	ENST00000392614	ENST00000392610	0	0	0	0	0	0
111128	AFE	ENSG00000127328	RAB3IP	coding	55	0	chr12,+,70132810,70149163	NA	NA	ENST00000378809	ENST00000247833	15	0	18	0	12	2
155175	other	ENSG00000175582	RAB6A	na	225	5	chr11,-,73427406,73429657	NA	NA	ENST00000310653	ENST00000336083	397	80	48	15	5	14
101171	AFE	ENSG00000152061	RABGAP1L	coding	11	0	chr1,+,174769637,174780969	NA	NA	ENST00000251507	ENST00000367686	1	4	0	0	0	0
111702	AFE	ENSG00000161800	RACGAP1P	coding	19	5	chr12,-,50410501,50419110	NA	NA	ENST00000427314	ENST00000454520	0	0	0	0	0	0
139601	ALE	ENSG00000113522	RAD50	coding	13	3	chr5,+,131927725,131928455	NA	NA	ENST00000265335	ENST00000434288	1	0	0	0	0	1
155478	other	ENSG00000051180	RAD51	na	69	0	chr15,+,40993398,40998374	NA	NA	ENST00000382643	ENST00000267868	0	0	0	0	0	0
155710	other	ENSG00000185379	RAD51L3	na	9	0	chr17,-,33434465,33445519	NA	NA	ENST00000394589	ENST00000339934	1	10	0	0	2	0
113361	ALE	ENSG00000080823	RAGE	coding	15	0	chr14,-,102692744,102698871	NA	NA	ENST00000361847	ENST00000193029	0	0	0	0	0	0
117960	AFE	ENSG00000017797	RALBP1	coding	52	0	chr18,+,9475688,9512988	NA	NA	ENST00000019317	ENST00000383432	1	0	15	1	0	0
151045	AFE	ENSG00000160271	RALGDS	coding	73	1	chr9,-,135987538,136024349	NA	NA	ENST00000372062	ENST00000372051	0	0	3	0	0	0
149814	AFE	ENSG00000136828	RALGPS1	coding	29	0	chr9,+,129973056,129974409	NA	NA	ENST00000259351	ENST00000438723	0	1	0	1	0	0
149816	ALE	ENSG00000136828	RALGPS1	coding	8	1	chr9,+,129977120,129979184	NA	NA	ENST00000259351	ENST00000373434	0	0	0	0	0	0
158647	other	ENSG00000136828	RALGPS1	na	15	0	chr9,+,129957495,129972973	NA	NA	ENST00000259351	ENST00000373434	1	0	1	0	0	0
133589	AFE	ENSG00000100401	RANGAP1	coding	41	0	chr22,-,41677085,41681989	NA	NA	ENST00000405383	ENST00000356244	4	0	0	0	0	0
157210	other	ENSG00000100401	RANGAP1	na	22	2	chr22,-,41677085,41680904	NA	NA	ENST00000405383	ENST00000405486	11	0	0	0	0	0
100183	AFE	ENSG00000116473	RAP1A	coding	73	1	chr1,+,112162555,112233955	NA	NA	ENST00000356415	ENST00000369709	0	1	5	0	10	1
104863	AFE	ENSG00000076864	RAP1GAP	coding	23	2	chr1,-,21946542,21952796	NA	NA	ENST00000374761	ENST00000317967	16	0	0	0	0	0
151031	AFE	ENSG00000107263	RAPGEF1	coding	78	2	chr9,-,134526335,134615156	NA	NA	ENST00000372190	ENST00000372195	25	4	27	1	6	3
140306	ALE	ENSG00000158987	RAPGEF6	coding	33	4	chr5,-,130762983,130764594	NA	NA	ENST00000395229	ENST00000296859	28	6	3	4	6	0
125769	ALE	ENSG00000173166	RAPH1	coding	33	3	chr2,-,204306802,204309590	NA	NA	ENST00000374493	ENST00000308091	0	0	0	0	4	0
116348	AFE	ENSG00000131759	RARA	coding	50	4	chr17,+,38487647,38504567	NA	NA	ENST00000319149	ENST00000254066	0	0	0	0	0	0
111731	AFE	ENSG00000172819	RARG	coding	16	4	chr12,-,53609577,53613733	NA	NA	ENST00000394426	ENST00000338561	0	0	0	0	0	0
138157	AFE	ENSG00000068028	RASSF1	coding	19	0	chr3,-,50369584,50374603	NA	NA	ENST00000357043	ENST00000327761	0	0	3	2	1	0
153564	AFE	ENSG00000102054	RBBP7	coding	84	2	chrX,-,16887342,16888160	NA	NA	ENST00000380084	ENST00000330735	13	1	15	0	11	0
158913	other	ENSG00000102054	RBBP7	na	9	0	chrX,-,16870244,16870538	NA	NA	ENST00000380084	ENST00000380085	0	0	0	0	0	0
117751	AFE	ENSG00000101773	RBBP8	coding	8	4	chr18,+,20514040,20516716	NA	NA	ENST00000360790	ENST00000399722	0	0	0	0	0	0
117752	AFE	ENSG00000101773	RBBP8	coding	14	5	chr18,+,20514121,20516716	NA	NA	ENST00000360790	ENST00000399721	0	0	0	1	0	0
128725	ALE	ENSG00000125826	RBCK1	coding	101	12	chr20,+,390668,391055	NA	NA	ENST00000356286	ENST00000400245	0	1	0	7	1	3
155061	other	ENSG00000173933	RBM14	na	8	5	chr11,+,66384527,66407170	NA	NA	ENST00000310137	ENST00000412278	0	0	0	0	0	0
128980	AFE	ENSG00000132819	RBM38	coding	8	0	chr20,+,55967547,55967709	NA	NA	ENST00000356208	ENST00000371219	0	0	0	0	0	0
133269	AFE	ENSG00000100320	RBM9	coding	104	0	chr22,-,36206050,36236238	NA	NA	ENST00000438146	ENST00000262829	29	0	2	0	0	0
153172	ALE	ENSG00000147274	RBMX	coding	100	13	chrX,-,135954503,135957244	NA	NA	ENST00000320676	ENST00000419968	14	12	3	4	1	4
108432	AFE	ENSG00000138207	RBP4	coding	9	0	chr10,-,95360802,95360927	NA	NA	ENST00000371467	ENST00000371464	2	0	1	0	47	0
138661	AFE	ENSG00000168214	RBPJ	coding	121	13	chr4,+,26322669,26387974	NA	NA	ENST00000342295	ENST00000348160	7	0	15	0	4	0
138662	AFE	ENSG00000168214	RBPJ	coding	34	9	chr4,+,26364249,26387974	NA	NA	ENST00000342295	ENST00000342320	10	1	0	0	2	0
148829	ALE	ENSG00000157110	RBPMS	coding	14	1	chr8,+,30402140,30407016	NA	NA	ENST00000339877	ENST00000287771	0	0	0	0	0	0
148830	ALE	ENSG00000157110	RBPMS	coding	574	18	chr8,+,30402140,30416403	NA	NA	ENST00000339877	ENST00000320203	0	0	0	0	0	0
143553	AFE	ENSG00000172348	RCAN2	coding	8	0	chr6,-,46424714,46458909	NA	NA	ENST00000306764	ENST00000371374	13	0	51	0	5	0
139321	ALE	ENSG00000181826	RELL1	coding	27	2	chr4,-,37614963,37633006	NA	NA	ENST00000314117	ENST00000454158	13	0	0	6	3	0
103931	AFE	ENSG00000143390	RFX5	coding	125	9	chr1,-,151319081,151319230	NA	NA	ENST00000290524	ENST00000392746	0	13	0	0	0	0
103910	ALE	ENSG00000143390	RFX5	coding	16	1	chr1,-,151317079,151317203	NA	NA	ENST00000290524	ENST00000413829	0	0	0	0	0	0
149645	AFE	ENSG00000138835	RGS3	coding	10	0	chr9,+,116226160,116241770	NA	NA	ENST00000350696	ENST00000317613	0	0	11	1	0	0
149652	AFE	ENSG00000138835	RGS3	coding	15	2	chr9,+,116356617,116356709	NA	NA	ENST00000350696	ENST00000297897	2	0	27	4	26	0
104291	AFE	ENSG00000143248	RGS5	coding	26	3	chr1,-,163138157,163172581	NA	NA	ENST00000367903	ENST00000313961	13	10	267	103	22	7
138058	ALE	ENSG00000067560	RHOA	coding	64	0	chr3,-,49398500,49399930	NA	NA	ENST00000418115	ENST00000422781	1	0	4	0	3	0
148585	AFE	ENSG00000176406	RIMS2	coding	9	0	chr8,+,104778764,104897525	NA	NA	ENST00000262231	ENST00000329869	0	0	0	0	0	0
158550	other	ENSG00000176406	RIMS2	na	22	0	chr8,+,104898450,104922361	NA	NA	ENST00000262231	ENST00000329108	1	40	0	0	0	0
156961	other	ENSG00000183421	RIPK4	na	18	1	chr21,-,43166021,43166772	NA	NA	ENST00000352483	ENST00000330470	0	0	0	0	0	0
104133	AFE	ENSG00000143622	RIT1	coding	37	0	chr1,-,155880594,155881033	NA	NA	ENST00000368322	ENST00000368323	9	0	5	0	5	0
112260	ALE	ENSG00000136104	RNASEH2B	coding	42	3	chr13,+,51523640,51544067	NA	NA	ENST00000336617	ENST00000422660	0	1	0	8	0	0
158008	other	ENSG00000026297	RNASET2	na	88	12	chr6,-,167356576,167360169	NA	NA	ENST00000428859	ENST00000028008	0	14	0	3	5	35
135706	AFE	ENSG00000164068	RNF123	coding	8	0	chr3,+,49750324,49750945	NA	NA	ENST00000389066	ENST00000433785	0	0	0	0	0	0
139783	AFE	ENSG00000013561	RNF14	coding	23	3	chr5,+,141350441,141353147	NA	NA	ENST00000356143	ENST00000394514	48	70	18	24	15	6
140641	AFE	ENSG00000145860	RNF145	coding	11	0	chr5,-,158630663,158636238	NA	NA	ENST00000274542	ENST00000424310	4	0	7	0	4	0
156352	other	ENSG00000168894	RNF181	na	499	32	chr2,+,85823771,85823944	NA	NA	ENST00000456023	ENST00000306368	41	2	60	19	52	3
156353	other	ENSG00000168894	RNF181	na	12	26	chr2,+,85823771,85823979	NA	NA	ENST00000456023	ENST00000443647	0	19	0	4	1	20
102666	AFE	ENSG00000187147	RNF220	coding	28	0	chr1,+,45097879,45098014	NA	NA	ENST00000453887	ENST00000335497	0	0	0	0	0	0
129674	AFE	ENSG00000101236	RNF24	coding	13	0	chr20,-,3944670,3996083	NA	NA	ENST00000432261	ENST00000358395	0	0	0	0	0	0
141818	ALE	ENSG00000204308	RNF5	coding	30	27	chr6,+,32147902,32148005	NA	NA	ENST00000427134	ENST00000375085	6	10	0	14	0	8
112432	AFE	ENSG00000127870	RNF6	coding	13	0	chr13,-,26795466,26795918	NA	NA	ENST00000381588	ENST00000346166	16	0	0	0	1	0
157258	other	ENSG00000114125	RNF7	na	16	0	chr3,+,141457357,141461485	NA	NA	ENST00000273480	ENST00000392999	0	0	0	0	0	0
110014	AFE	ENSG00000023191	RNH1	coding	25	1	chr11,-,504995,506608	NA	NA	ENST00000354420	ENST00000397615	1	0	0	0	0	1
155150	other	ENSG00000023191	RNH1	na	44	2	chr11,-,502180,507112	NA	NA	ENST00000354420	ENST00000397604	0	0	0	0	0	0
115599	AFE	ENSG00000205937	RNPS1	coding	21	0	chr16,-,2314760,2317663	NA	NA	ENST00000320225	ENST00000397086	0	0	0	0	0	0
138343	AFE	ENSG00000169855	ROBO1	coding	188	5	chr3,-,78988076,79067556	NA	NA	ENST00000305299	ENST00000343019	12	3	0	1	0	0
135980	AFE	ENSG00000185008	ROBO2	coding	13	0	chr3,+,77089996,77147164	NA	NA	ENST00000403211	ENST00000332191	0	0	0	0	0	0
150758	AFE	ENSG00000119314	ROD1	coding	49	4	chr9,-,115060195,115095749	NA	NA	ENST00000458258	ENST00000343327	0	0	0	5	0	0
114503	AFE	ENSG00000069667	RORA	coding	27	2	chr15,-,60824049,60884585	NA	NA	ENST00000261523	ENST00000449337	46	10	14	0	86	14
121884	ALE	ENSG00000197713	RPE	coding	64	0	chr2,+,210882282,210884392	NA	NA	ENST00000457015	ENST00000354506	61	0	10	0	17	0
121885	ALE	ENSG00000197713	RPE	coding	8	0	chr2,+,210882282,210884396	NA	NA	ENST00000457015	ENST00000435437	0	2	0	0	0	0
156162	other	ENSG00000197713	RPE	na	9	0	chr2,+,210882282,210882876	NA	NA	ENST00000457015	ENST00000429907	0	0	0	0	0	0
112168	AFE	ENSG00000122026	RPL21	coding	104	9	chr13,+,27825835,27827901	NA	NA	ENST00000311549	ENST00000326092	1	0	2	0	0	0
158627	other	ENSG00000156482	RPL30	na	1819	21	chr8,-,99057315,99057574	NA	NA	ENST00000396072	ENST00000287038	317	4	791	52	473	32
120003	ALE	ENSG00000071082	RPL31P49	coding	120	22	chr2,+,101622532,101635459	NA	NA	ENST00000409038	ENST00000409028	6	13	6	0	0	1
121975	ALE	ENSG00000197756	RPL37A	coding	34	0	chr2,+,217364753,217385436	NA	NA	ENST00000359681	ENST00000441179	0	0	0	0	0	0
136975	AFE	ENSG00000163923	RPL39L	coding	38	9	chr3,-,186845849,186857000	NA	NA	ENST00000433055	ENST00000296277	2	0	0	0	0	0
149263	AFE	ENSG00000161016	RPL8	coding	20	0	chr8,-,146017524,146017629	NA	NA	ENST00000262584	ENST00000394920	0	0	0	0	0	0
118039	AFE	ENSG00000141425	RPRD1A	coding	39	0	chr18,-,33613799,33620769	NA	NA	ENST00000399022	ENST00000337059	32	0	0	0	0	0
118038	ALE	ENSG00000141425	RPRD1A	coding	17	6	chr18,-,33605640,33606862	NA	NA	ENST00000399022	ENST00000319040	0	0	0	0	0	0
107044	ALE	ENSG00000138326	RPS24	coding	768	1	chr10,+,79797061,79799961	NA	NA	ENST00000440692	ENST00000360830	64	0	20	0	92	0
107048	ALE	ENSG00000138326	RPS24	coding	389	3431	chr10,+,79797061,79800372	NA	NA	ENST00000440692	ENST00000372360	0	274	0	239	10	498
123693	AFE	ENSG00000143947	RPS27A	coding	46	2	chr2,+,55459843,55459943	NA	NA	ENST00000402285	ENST00000272317	12	0	19	0	5	0
113550	ALE	ENSG00000213741	RPS29P11	coding	298	2234	chr14,-,50050392,50052667	NA	NA	ENST00000396020	ENST00000245458	46	377	162	458	176	259
102174	AFE	ENSG00000117676	RPS6KA1	coding	66	17	chr1,+,26863459,26873357	NA	NA	ENST00000374162	ENST00000374164	0	0	0	0	0	0
122021	ALE	ENSG00000144580	RQCD1	coding	23	0	chr2,+,219457429,219458250	NA	NA	ENST00000273064	ENST00000295701	0	17	0	1	0	0
109755	AFE	ENSG00000133818	RRAS2	coding	10	0	chr11,-,14317400,14379802	NA	NA	ENST00000256196	ENST00000414023	0	0	0	0	0	0
113593	AFE	ENSG00000139970	RTN1	coding	25	0	chr14,-,60074209,60097163	NA	NA	ENST00000267484	ENST00000342503	737	225	0	0	0	0
139951	AFE	ENSG00000176783	RUFY1	coding	14	0	chr5,+,178986835,178987025	NA	NA	ENST00000393448	ENST00000393438	2	0	2	0	0	0
138786	AFE	ENSG00000018189	RUFY3	coding	31	0	chr4,+,71571010,71628235	NA	NA	ENST00000381006	ENST00000417478	95	1	86	0	105	0
100769	AFE	ENSG00000160753	RUSC1	coding	12	0	chr1,+,155294334,155294635	NA	NA	ENST00000368352	ENST00000368347	0	0	0	0	0	0
100770	AFE	ENSG00000160753	RUSC1	coding	18	0	chr1,+,155294377,155294635	NA	NA	ENST00000368352	ENST00000368349	0	0	0	0	0	0
104011	AFE	ENSG00000188643	S100A16	coding	187	0	chr1,-,153580652,153585427	NA	NA	ENST00000368705	ENST00000368706	0	0	7	1	8	0
103996	AFE	ENSG00000196154	S100A4	coding	36	0	chr1,-,153517284,153518228	NA	NA	ENST00000368715	ENST00000368716	10	0	18	0	18	0
102325	ALE	ENSG00000116497	S100PBP	coding	23	0	chr1,+,33295667,33299634	NA	NA	ENST00000373476	ENST00000439419	0	0	0	0	0	0
113458	AFE	ENSG00000165821	SALL2	coding	22	0	chr14,-,21993787,21994194	NA	NA	ENST00000327430	ENST00000317492	2	0	0	0	0	0
103168	AFE	ENSG00000187634	SAMD11	coding	17	0	chr1,+,860327,861301	NA	NA	ENST00000443100	ENST00000420190	0	0	0	0	0	0
132298	AFE	ENSG00000100347	SAMM50	coding	232	2	chr22,+,44351477,44359165	NA	NA	ENST00000396202	ENST00000350028	28	0	35	5	0	0
124700	AFE	ENSG00000136715	SAP130	coding	11	0	chr2,-,128783871,128784665	NA	NA	ENST00000259234	ENST00000259235	0	0	0	0	0	0
155923	other	ENSG00000104835	SARS2	na	80	1	chr19,-,39412306,39412877	NA	NA	ENST00000430193	ENST00000221431	0	0	0	0	0	0
136909	AFE	ENSG00000182568	SATB1	coding	24	0	chr3,-,18462482,18486098	NA	NA	ENST00000332610	ENST00000440737	0	0	0	0	0	0
155889	other	ENSG00000064932	SBNO2	na	101	6	chr19,-,1127763,1147307	NA	NA	ENST00000250872	ENST00000319671	0	0	2	0	7	0
108671	AFE	ENSG00000109929	SC5DL	coding	18	2	chr11,+,121163786,121174074	NA	NA	ENST00000264027	ENST00000392789	32	0	11	0	12	1
155508	other	ENSG00000176700	SCAND2	na	11	0	chr15,+,85175528,85180577	NA	NA	ENST00000318093	ENST00000348993	0	0	0	0	0	0
134370	AFE	ENSG00000151967	SCHIP1	coding	56	27	chr3,+,159558002,159583951	NA	NA	ENST00000412423	ENST00000445224	89	37	0	0	0	0
147174	AFE	ENSG00000136193	SCRN1	coding	15	0	chr7,-,30008683,30029257	NA	NA	ENST00000416113	ENST00000242059	3	0	0	0	0	0
137592	ALE	ENSG00000093183	SEC22C	coding	8	5	chr3,-,42605471,42610356	NA	NA	ENST00000264454	ENST00000456222	0	0	0	0	0	0
157734	other	ENSG00000138674	SEC31A	na	198	26	chr4,-,83750210,83763337	NA	NA	ENST00000432794	ENST00000264405	17	12	37	8	0	0
107276	ALE	ENSG00000075826	SEC31B	coding	8	0	chr10,-,102259915,102262010	NA	NA	ENST00000370345	ENST00000451524	0	0	0	0	0	1
134145	AFE	ENSG00000058262	SEC61A1	coding	130	0	chr3,+,127771401,127771677	NA	NA	ENST00000424880	ENST00000243253	2	3	7	0	1	0
134654	AFE	ENSG00000163904	SENP2	coding	170	3	chr3,+,185300604,185307901	NA	NA	ENST00000427465	ENST00000430355	0	0	0	0	0	0
122870	AFE	ENSG00000168385	2002-09-01	coding	259	0	chr2,+,242255024,242263630	NA	NA	ENST00000391972	ENST00000391973	0	0	0	0	0	0
122923	ALE	ENSG00000168385	2002-09-01	coding	12	0	chr2,+,242275512,242276199	NA	NA	ENST00000391972	ENST00000366210	0	0	0	0	0	0
153070	ALE	ENSG00000125354	2006-09-01	coding	74	13	chrX,-,118752748,118763280	NA	NA	ENST00000394612	ENST00000343984	0	5	0	1	0	1
144911	AFE	ENSG00000122545	2007-09-01	coding	688	0	chr7,+,35840881,35872407	NA	NA	ENST00000399034	ENST00000350320	443	0	53	0	24	0
107890	AFE	ENSG00000165406	2008-09-01	coding	34	4	chr10,-,45956858,45959686	NA	NA	ENST00000453424	ENST00000319836	15	15	0	5	0	6
140411	ALE	ENSG00000164402	2009-09-01	coding	96	1	chr5,-,132094515,132096493	NA	NA	ENST00000378719	ENST00000296873	40	0	16	1	2	0
113943	AFE	ENSG00000140264	SERF2	coding	9	2	chr15,+,44092345,44092692	NA	NA	ENST00000337861	ENST00000406925	0	0	0	0	0	0
113932	ALE	ENSG00000140264	SERF2	coding	14	129	chr15,+,44085280,44085884	NA	NA	ENST00000337861	ENST00000339624	0	3	0	3	0	13
113936	ALE	ENSG00000140264	SERF2	coding	1555	30	chr15,+,44085280,44085907	NA	NA	ENST00000337861	ENST00000249786	14	6	43	25	43	22
102285	AFE	ENSG00000168528	SERINC2	coding	93	0	chr1,+,31886150,31896539	NA	NA	ENST00000373710	ENST00000373709	0	0	0	0	1	0
142929	AFE	ENSG00000124570	SERPINB6	coding	9	0	chr6,-,2959575,2971350	NA	NA	ENST00000316782	ENST00000380529	0	0	11	0	2	0
142932	AFE	ENSG00000124570	SERPINB6	coding	14	0	chr6,-,2959575,2971766	NA	NA	ENST00000316782	ENST00000380546	0	0	3	1	2	0
126283	AFE	ENSG00000135919	SERPINE2	coding	65	0	chr2,-,224866638,224903815	NA	NA	ENST00000447280	ENST00000258405	2	0	0	0	0	0
142353	AFE	ENSG00000080546	SESN1	coding	16	1	chr6,-,109323545,109330561	NA	NA	ENST00000302071	ENST00000356644	3	0	6	0	5	0
149910	AFE	ENSG00000119335	SET	coding	1706	92	chr9,+,131451933,131453448	NA	NA	ENST00000372692	ENST00000322030	158	10	54	3	17	0
117844	AFE	ENSG00000152217	SETBP1	coding	9	0	chr18,+,42260359,42281139	NA	NA	ENST00000282030	ENST00000426838	0	0	0	0	0	0
113761	ALE	ENSG00000183576	SETD3	coding	13	9	chr14,-,99876551,99879287	NA	NA	ENST00000331768	ENST00000329331	0	0	4	5	0	1
125563	AFE	ENSG00000115524	SF3B1	coding	28	9	chr2,-,198263304,198263692	NA	NA	ENST00000335508	ENST00000424674	10	13	0	2	3	14
125564	ALE	ENSG00000115524	SF3B1	coding	12	1	chr2,-,198283674,198285151	NA	NA	ENST00000335508	ENST00000414963	0	0	0	0	0	0
103000	ALE	ENSG00000116754	SFRS11	coding	50	5	chr1,+,70694237,70697541	NA	NA	ENST00000370950	ENST00000436161	0	6	0	0	0	0
111629	ALE	ENSG00000139218	SFRS2IP	coding	17	11	chr12,-,46355104,46355482	NA	NA	ENST00000369367	ENST00000395453	15	23	0	1	4	3
141947	ALE	ENSG00000112081	SFRS3	coding	31	1	chr6,+,36566759,36567597	NA	NA	ENST00000373715	ENST00000339436	0	0	0	0	0	0
128737	ALE	ENSG00000124193	SFRS6	coding	21	0	chr20,+,42087148,42087792	NA	NA	ENST00000244020	ENST00000328748	0	0	7	0	0	0
142605	AFE	ENSG00000118515	SGK1	coding	11	1	chr6,-,134495723,134495869	NA	NA	ENST00000367858	ENST00000237305	20	5	22	1	17	0
138670	ALE	ENSG00000087266	SH3BP2	coding	8	0	chr4,+,2824763,2825121	NA	NA	ENST00000442312	ENST00000389838	0	0	0	0	0	0
117351	AFE	ENSG00000159314	SH3D20	coding	45	0	chr17,-,43483448,43502929	NA	NA	ENST00000428638	ENST00000376922	0	0	1	0	0	0
148393	ALE	ENSG00000127922	SHFM1	coding	247	68	chr7,-,96318277,96324109	NA	NA	ENST00000449279	ENST00000248566	53	8	59	0	11	0
137873	AFE	ENSG00000164054	SHISA5	coding	504	4	chr3,-,48511241,48514418	NA	NA	ENST00000296444	ENST00000426002	0	4	4	0	1	4
111017	AFE	ENSG00000182199	SHMT2	coding	201	25	chr12,+,57623593,57624585	NA	NA	ENST00000414700	ENST00000328923	0	1	0	0	1	2
155638	other	ENSG00000196470	SIAH1	na	52	0	chr16,-,48396340,48419114	NA	NA	ENST00000356721	ENST00000394725	4	0	1	0	0	0
114619	AFE	ENSG00000169375	SIN3A	coding	147	1	chr15,-,75722748,75743763	NA	NA	ENST00000360439	ENST00000394947	0	0	0	1	0	0
140001	ALE	ENSG00000145604	SKP2	coding	115	24	chr5,+,36177393,36181919	NA	NA	ENST00000308927	ENST00000274255	0	0	0	0	0	5
158910	other	ENSG00000126903	SLC10A3	na	35	2	chrX,-,153717420,153718645	NA	NA	ENST00000393586	ENST00000263512	3	4	0	0	0	0
111710	AFE	ENSG00000110911	SLC11A2	coding	20	1	chr12,-,51404548,51420092	NA	NA	ENST00000394904	ENST00000262051	2	1	0	0	7	0
114312	AFE	ENSG00000140199	SLC12A6	coding	39	1	chr15,-,34567589,34610761	NA	NA	ENST00000354181	ENST00000290209	0	0	0	0	1	5
129783	ALE	ENSG00000158296	SLC13A3	coding	10	6	chr20,-,45237695,45239084	NA	NA	ENST00000279027	ENST00000339636	0	0	0	0	0	0
116656	AFE	ENSG00000170190	SLC16A5	coding	28	1	chr17,+,73085398,73089683	NA	NA	ENST00000450736	ENST00000329783	0	0	0	1	0	0
108137	AFE	ENSG00000165449	SLC16A9	coding	33	2	chr10,-,61444084,61469236	NA	NA	ENST00000395347	ENST00000395348	0	0	0	0	0	0
119621	AFE	ENSG00000105281	SLC1A5	coding	9	0	chr19,-,47287815,47290495	NA	NA	ENST00000306894	ENST00000412532	0	0	0	0	0	0
108939	AFE	ENSG00000110628	SLC22A18	coding	29	0	chr11,+,2923593,2924443	NA	NA	ENST00000347936	ENST00000312221	0	0	0	0	0	0
129850	AFE	ENSG00000089057	SLC23A2	coding	14	0	chr20,-,4951564,4982051	NA	NA	ENST00000379333	ENST00000338244	32	0	5	0	12	0
155762	other	ENSG00000125454	SLC25A19	na	19	2	chr17,-,73282882,73284468	NA	NA	ENST00000416858	ENST00000320362	0	0	0	0	0	0
119928	ALE	ENSG00000125648	SLC25A23	coding	29	0	chr19,-,6442169,6444161	NA	NA	ENST00000264088	ENST00000301454	1	1	1	0	2	0
149870	AFE	ENSG00000148339	SLC25A25	coding	20	0	chr9,+,130861003,130863374	NA	NA	ENST00000373069	ENST00000373064	0	0	0	0	0	8
155249	other	ENSG00000075415	SLC25A3	na	1793	10	chr12,+,98987912,98989504	NA	NA	ENST00000228318	ENST00000188376	43	0	8	0	21	0
111025	AFE	ENSG00000135502	SLC26A10	coding	9	1	chr12,+,58005773,58006712	NA	NA	ENST00000333972	ENST00000286494	0	0	0	0	0	0
142110	AFE	ENSG00000112759	SLC29A1	coding	172	2	chr6,+,44191377,44194999	NA	NA	ENST00000313248	ENST00000371755	0	0	1	0	0	2
157938	other	ENSG00000112759	SLC29A1	na	21	0	chr6,+,44193903,44194999	NA	NA	ENST00000313248	ENST00000371724	0	0	0	0	0	2
156909	other	ENSG00000160190	SLC37A1	na	23	1	chr21,+,43935044,43938386	NA	NA	ENST00000398341	ENST00000398343	0	0	0	0	0	0
153714	AFE	ENSG00000017483	SLC38A5	coding	20	0	chrX,-,48326311,48326691	NA	NA	ENST00000317669	ENST00000413668	0	0	0	0	0	0
153717	AFE	ENSG00000017483	SLC38A5	coding	22	0	chrX,-,48326311,48327272	NA	NA	ENST00000317669	ENST00000416711	0	0	0	0	0	0
113145	ALE	ENSG00000139974	SLC38A6	coding	26	3	chr14,+,61518852,61519066	NA	NA	ENST00000354886	ENST00000267488	8	18	5	3	0	5
104032	AFE	ENSG00000143570	SLC39A1	coding	8	0	chr1,-,153935222,153935652	NA	NA	ENST00000356205	ENST00000429040	0	0	0	0	0	0
121381	AFE	ENSG00000196950	SLC39A10	coding	51	1	chr2,+,196470956,196544755	NA	NA	ENST00000409086	ENST00000458054	19	50	0	0	0	0
121384	AFE	ENSG00000196950	SLC39A10	coding	35	3	chr2,+,196522004,196544755	NA	NA	ENST00000409086	ENST00000359634	0	32	0	0	0	0
158557	other	ENSG00000104635	SLC39A14	na	48	0	chr8,+,22266008,22269549	NA	NA	ENST00000359741	ENST00000240095	0	5	1	29	0	7
118188	ALE	ENSG00000129353	SLC44A2	coding	192	85	chr19,+,10753126,10753572	NA	NA	ENST00000335757	ENST00000380614	0	0	0	0	0	0
129382	AFE	ENSG00000088836	SLC4A11	coding	40	0	chr20,-,3218233,3219740	NA	NA	ENST00000380059	ENST00000437836	0	0	0	0	0	0
126848	AFE	ENSG00000138074	SLC5A6	coding	9	0	chr2,-,27434400,27434578	NA	NA	ENST00000310574	ENST00000401463	4	1	0	0	0	0
126851	AFE	ENSG00000138074	SLC5A6	coding	26	0	chr2,-,27434400,27434634	NA	NA	ENST00000310574	ENST00000426119	0	0	0	0	0	0
154729	other	ENSG00000196517	SLC6A9	na	10	0	chr1,-,44476553,44489919	NA	NA	ENST00000372307	ENST00000372310	0	0	0	0	0	0
158555	other	ENSG00000003989	SLC7A2	na	30	0	chr8,+,17409494,17412068	NA	NA	ENST00000398090	ENST00000004531	0	13	0	0	0	2
157406	other	ENSG00000163681	SLMAP	na	10	1	chr3,+,57850583,57850968	NA	NA	ENST00000428312	ENST00000383718	0	0	0	0	0	0
118080	AFE	ENSG00000175387	SMAD2	coding	30	0	chr18,-,45423179,45456731	NA	NA	ENST00000402690	ENST00000262160	9	1	0	1	0	0
155807	other	ENSG00000127616	SMARCA4	na	161	13	chr19,+,11145807,11151973	NA	NA	ENST00000358026	ENST00000413806	0	2	0	0	0	0
138885	AFE	ENSG00000163104	SMARCAD1	coding	93	0	chr4,+,95129220,95129496	NA	NA	ENST00000359052	ENST00000354268	1	0	5	0	15	7
116039	AFE	ENSG00000177427	SMCR7	coding	9	1	chr17,+,18164050,18166027	NA	NA	ENST00000395706	ENST00000323019	0	0	0	0	0	1
132205	AFE	ENSG00000100335	SMCR7L	coding	37	0	chr22,+,39898441,39900207	NA	NA	ENST00000402881	ENST00000216171	1	0	1	0	6	0
101277	ALE	ENSG00000116698	SMG7	coding	8	0	chr1,+,183495901,183496760	NA	NA	ENST00000413782	ENST00000367541	0	3	0	0	0	0
102242	AFE	ENSG00000180198	SNORA73A	coding	49	1	chr1,+,28844819,28856369	NA	NA	ENST00000398962	ENST00000373831	0	0	0	0	0	0
105286	ALE	ENSG00000060688	SNRNP40	coding	209	40	chr1,-,31732967,31734375	NA	NA	ENST00000446633	ENST00000263694	27	4	7	8	0	2
157957	other	ENSG00000168566	SNRNP48	na	8	1	chr6,+,7595333,7599905	NA	NA	ENST00000342415	ENST00000397475	0	0	0	0	0	0
155934	other	ENSG00000125743	SNRPD2	na	79	0	chr19,-,46192604,46195144	NA	NA	ENST00000342669	ENST00000391932	0	0	0	0	0	0
113794	AFE	ENSG00000128739	SNRPN	coding	11	3	chr15,+,25068969,25131662	NA	NA	ENST00000401453	ENST00000444203	2	9	0	1	0	0
113801	AFE	ENSG00000128739	SNRPN	coding	3016	226	chr15,+,25200208,25207260	NA	NA	ENST00000401453	ENST00000390687	37	22	36	42	1	4
113803	AFE	ENSG00000128739	SNRPN	coding	6989	656	chr15,+,25219602,25220504	NA	NA	ENST00000428674	ENST00000338094	1713	3384	778	1041	122	130
116455	AFE	ENSG00000002919	SNX11	coding	12	3	chr17,+,46189472,46189935	NA	NA	ENST00000393405	ENST00000452859	0	0	0	0	0	0
146974	AFE	ENSG00000071189	SNX13	coding	33	6	chr7,-,17937068,17979906	NA	NA	ENST00000417048	ENST00000409076	10	8	19	14	19	3
123608	AFE	ENSG00000171150	SOCS5	coding	25	2	chr2,+,46926587,46985657	NA	NA	ENST00000306503	ENST00000394861	24	0	2	0	2	0
112522	AFE	ENSG00000120669	SOHLH2	coding	17	4	chr13,-,36828279,36857605	NA	NA	ENST00000412281	ENST00000239859	0	0	0	0	0	0
130270	ALE	ENSG00000159140	SON	coding	110	17	chr21,+,34932080,34932182	NA	NA	ENST00000356577	ENST00000300278	12	0	3	4	0	2
101484	AFE	ENSG00000143842	SOX13	coding	90	0	chr1,+,204042838,204082042	NA	NA	ENST00000367206	ENST00000272193	0	0	0	0	0	0
149109	ALE	ENSG00000171056	SOX7	coding	79	14	chr8,-,10677778,10683661	NA	NA	ENST00000354846	ENST00000314787	4	4	3	0	1	2
155744	other	ENSG00000008294	SPAG9	na	49	3	chr17,-,49119011,49123860	NA	NA	ENST00000376407	ENST00000357791	15	25	0	0	0	0
122171	AFE	ENSG00000072195	SPEG	coding	49	0	chr2,+,220308780,220309374	NA	NA	ENST00000312358	ENST00000396695	0	0	0	0	0	0
101024	AFE	ENSG00000065526	SPEN	coding	11	5	chr1,+,16200889,16202696	NA	NA	ENST00000375759	ENST00000375753	9	3	0	0	0	0
112526	AFE	ENSG00000133104	SPG20	coding	15	7	chr13,-,36909968,36910423	NA	NA	ENST00000355182	ENST00000423217	9	0	0	0	0	0
112529	AFE	ENSG00000133104	SPG20	coding	18	15	chr13,-,36909968,36920718	NA	NA	ENST00000355182	ENST00000451493	0	0	0	0	0	0
115437	ALE	ENSG00000197912	SPG7	coding	27	1	chr16,+,89599043,89603172	NA	NA	ENST00000268704	ENST00000341316	0	0	0	0	0	0
127532	AFE	ENSG00000198369	SPRED2	coding	73	2	chr2,-,65572029,65659095	NA	NA	ENST00000452315	ENST00000356388	0	1	0	0	5	0
127529	ALE	ENSG00000198369	SPRED2	coding	11	1	chr2,-,65571727,65571852	NA	NA	ENST00000452315	ENST00000427238	5	0	0	0	3	0
155379	other	ENSG00000136158	SPRY2	na	67	26	chr13,-,80911890,80914756	NA	NA	ENST00000377102	ENST00000377104	8	6	8	3	1	2
123690	AFE	ENSG00000115306	SPTBN1	coding	133	0	chr2,+,54786023,54826228	NA	NA	ENST00000356805	ENST00000333896	0	0	0	0	10	4
151618	ALE	ENSG00000090054	SPTLC1	coding	73	1	chr9,-,94841847,94842297	NA	NA	ENST00000415466	ENST00000337841	19	2	18	11	0	1
114990	AFE	ENSG00000080603	SRCAP	coding	8	1	chr16,+,30709781,30711228	NA	NA	ENST00000262518	ENST00000411466	0	0	0	0	0	0
139538	ALE	ENSG00000153037	SRP19	coding	58	30	chr5,+,112200428,112203068	NA	NA	ENST00000282999	ENST00000445150	0	18	0	0	0	0
146403	AFE	ENSG00000135250	SRPK2	coding	9	1	chr7,-,104844231,104909252	NA	NA	ENST00000336613	ENST00000357311	0	43	0	7	0	0
120941	AFE	ENSG00000138385	SSB	coding	13	3	chr2,+,170656025,170657461	NA	NA	ENST00000260956	ENST00000409333	0	0	0	0	0	0
108708	ALE	ENSG00000110080	ST3GAL4	coding	22	1	chr11,+,126279305,126283399	NA	NA	ENST00000239597	ENST00000227495	3	10	10	27	5	2
110452	AFE	ENSG00000166444	ST5	coding	16	0	chr11,-,8772271,8832063	NA	NA	ENST00000396665	ENST00000313726	0	0	1	1	0	0
157288	other	ENSG00000073849	ST6GAL1	na	10	0	chr3,+,186714460,186756529	NA	NA	ENST00000169298	ENST00000448408	2	0	6	0	2	0
107147	ALE	ENSG00000138134	STAMBPL1	coding	11	0	chr10,+,90682192,90682924	NA	NA	ENST00000371927	ENST00000371922	9	25	0	2	2	0
149488	AFE	ENSG00000040341	STAU2	coding	51	15	chr8,-,74601047,74650518	NA	NA	ENST00000418363	ENST00000343268	1	13	2	2	4	1
112738	AFE	ENSG00000102572	STK24	coding	322	18	chr13,-,99171726,99228998	NA	NA	ENST00000376547	ENST00000376533	0	0	2	2	1	0
149539	AFE	ENSG00000104375	STK3	coding	31	2	chr8,-,99787046,99837742	NA	NA	ENST00000354930	ENST00000339879	0	3	6	0	10	1
[truncated: 3,702 more rows]

## Sheet: TableS2B
Supplementary Table 2B. Splice variants found in human Embryonic Stem Cells where multiple transcript variants are expressed for a given locus.
This table also details the type of variant and whether the splice event distinguishing the two variants affects a protein domain found in one of the transcripts.
Variant types: AFE: Alternative First Exon; ALE: Alternative Last exon; A5SS: Alternative 5' splice site usage; A3SS: Alternative 3' splice site usage; MXE: Mutually exclusive exon usage; SE: Skipped exon; Other: Other splice types, i.e. complex splicing events
Event #	Type	Ensembl Gene ID	Gene symbol	Coordinate 1 (<chr>,<strand>,<left_junction>,<right_junction>)	Coordinate 2 (<chr>,<strand>,<left_junction>,<right_junction>)	Coding/non-coding/splice to last (splice to a last exon)	Variant Count junction 1	Variant Count junction 2	Paired end evidence junction 1 (# of pairs)	Paired end evidence junction 2 (# of pairs)	Protein domain affected by splice event (na = no domain identified; Unknown = not considered in protein analysis)	InterProID of protein domain affected by splice event	Representative transcript 1	Representative Transcript 2
110699	SE	ENSG00000081760	AACS	chr12,+,125619397,125626637	chr12,+,125619397,125621207__chr12,+,125621409,125626637	splice_to_last	14	64	0	2.5	AMP-dep_Synth/Lig	IPR000873	ENST00000261686	ENST00000316519
117285	A3SS	ENSG00000108825	AARSD1	chr17,-,41108520,41109154	chr17,-,41108576,41109154	non-coding	11	223	4	3	na	na	ENST00000416949	ENST00000436545
117288	A5SS	ENSG00000108825	AARSD1	chr17,-,41116253,41116418	chr17,-,41116253,41116459	coding	97	10	0	0	na	na	ENST00000430739	ENST00000441280
117290	AFE	ENSG00000108825	AARSD1	chr17,-,41116253,41116418	chr17,-,41116253,41122305	coding	97	12	0	0	unknown	unknown	ENST00000436545	ENST00000454303
117291	AFE	ENSG00000108825	AARSD1	chr17,-,41116253,41116459	chr17,-,41116253,41122305	coding	10	12	0	0	unknown	unknown	ENST00000450475	ENST00000452752
117292	ALE	ENSG00000108825	AARSD1	chr17,-,41116253,41122305	chr17,-,41121202,41122305	coding	12	31	0	18	unknown	unknown	ENST00000424284	ENST00000454303
117293	MXE	ENSG00000108825	AARSD1	chr17,-,41122358,41123623__chr17,-,41123712,41131394	chr17,-,41122358,41131186__chr17,-,41131284,41131394	coding	19	26	2	5.5	na	na	ENST00000409103	ENST00000453594
146558	A3SS	ENSG00000008311	AASS	chr7,-,121719743,121721553	chr7,-,121719765,121721553	non-coding	9	2028	80	41	na	na	ENST00000358954	ENST00000426162
146559	SE	ENSG00000008311	AASS	chr7,-,121719765,121726065	chr7,-,121719765,121721553__chr7,-,121721648,121726065	coding	17	1286.5	0	94	na	na	ENST00000393376	ENST00000431170
146560	SE	ENSG00000008311	AASS	chr7,-,121719765,121726065	chr7,-,121719765,121721553__chr7,-,121722944,121726065	coding	17	1049	0	22.5	na	na	ENST00000358954	ENST00000431170
146562	SE	ENSG00000008311	AASS	chr7,-,121721648,121726065	chr7,-,121721648,121722841__chr7,-,121722944,121726065	coding	545	50.5	147	13.5	na	na	ENST00000358954	ENST00000393376
146563	A5SS	ENSG00000008311	AASS	chr7,-,121738629,121738798	chr7,-,121738629,121738802	splice_to_last	3392	13	6	123	na	na	ENST00000358954	ENST00000431170
126133	MXE	ENSG00000115657	ABCB6	chr2,-,220081186,220081373__chr2,-,220081553,220082846	chr2,-,220081186,220082391__chr2,-,220082528,220082846	coding	13	10	0	0	na	na	ENST00000295750	ENST00000427013
114781	MXE	ENSG00000103222	ABCC1	chr16,+,16173334,16177222__chr16,+,16177398,16184261	chr16,+,16173334,16180680__chr16,+,16180847,16184261	coding	62.5	71	5.5	6	ATPase_AAA+_core	IPR003593	ENST00000346370	ENST00000351154
113653	SE	ENSG00000119688	ABCD4	chr14,-,74759571,74761850	chr14,-,74759571,74759856__chr14,-,74759950,74761850	coding	68	155.5	2	9	na	na	ENST00000298816	ENST00000359493
146828	AFE	ENSG00000033050	ABCF2	chr7,-,150923585,150923942	chr7,-,150923585,150924248	coding	21	33	2	1	unknown	unknown	ENST00000287844	ENST00000441774
134494	A3SS	ENSG00000161204	ABCF3	chr3,+,183904662,183905151	chr3,+,183904662,183905184	splice_to_last	11	53	65	5	na	na	ENST00000292808	ENST00000421340
129319	ALE	ENSG00000100997	ABHD12	chr20,-,25275665,25282854	chr20,-,25281519,25282854	coding	25	112	2	70	unknown	unknown	ENST00000339157	ENST00000376542
107731	MXE	ENSG00000136754	ABI1	chr10,-,27040711,27044583__chr10,-,27044669,27054146	chr10,-,27040711,27047990__chr10,-,27048163,27054146	coding	84.5	33.5	27	15.5	na	na	ENST00000376137	ENST00000376166
107732	MXE	ENSG00000136754	ABI1	chr10,-,27040711,27044583__chr10,-,27044669,27054146	chr10,-,27040711,27047990__chr10,-,27048166,27054146	coding	84.5	34.5	27	5.5	na	na	ENST00000376137	ENST00000376138
107733	SE	ENSG00000136754	ABI1	chr10,-,27040711,27047990	chr10,-,27040711,27044583__chr10,-,27044669,27047990	coding	24	144.5	11	42	na	na	ENST00000346832	ENST00000376142
107737	A3SS	ENSG00000136754	ABI1	chr10,-,27048163,27054146	chr10,-,27048166,27054146	coding	43	45	20	0	na	na	ENST00000376138	ENST00000376160
121736	SE	ENSG00000138443	ABI2	chr2,+,204231766,204244930	chr2,+,204231766,204240779__chr2,+,204240854,204244930	coding	724	17	4	0.5	T_SNARE	IPR000727	ENST00000441061	ENST00000447762
121742	SE	ENSG00000138443	ABI2	chr2,+,204259568,204267298	chr2,+,204259568,204260378__chr2,+,204260502,204267298	splice_to_last	11	889.5	1	7	na	na	ENST00000416396	ENST00000441061
121743	SE	ENSG00000138443	ABI2	chr2,+,204259568,204267298	chr2,+,204259568,204260378__chr2,+,204261689,204267298	splice_to_last	11	261.5	1	5	na	na	ENST00000416396	ENST00000422511
121744	SE	ENSG00000138443	ABI2	chr2,+,204259568,204267298	chr2,+,204259568,204260384__chr2,+,204260502,204267298	splice_to_last	11	658.5	1	32.5	na	na	ENST00000416396	ENST00000451591
121748	SE	ENSG00000138443	ABI2	chr2,+,204260502,204267298	chr2,+,204260502,204261507__chr2,+,204261689,204267298	coding	1317	47	5	3	na	na	ENST00000261018	ENST00000454023
121749	SE	ENSG00000138443	ABI2	chr2,+,204260502,204267298	chr2,+,204260502,204261606__chr2,+,204261689,204267298	coding	1317	31	5	0.5	na	na	ENST00000261017	ENST00000422511
121755	SE	ENSG00000138443	ABI2	chr2,+,204267456,204281630	chr2,+,204267456,204276007__chr2,+,204276093,204281630	coding	448	353.5	10	17	na	na	ENST00000261017	ENST00000422511
150085	AFE	ENSG00000097007	ABL1	chr9,+,133589841,133729450	chr9,+,133710911,133729450	coding	33	52	0	0	unknown	unknown	ENST00000318560	ENST00000372348
104513	SE	ENSG00000143322	ABL2	chr1,-,179100615,179198375	chr1,-,179100615,179102446__chr1,-,179102508,179198375	coding	38	26	0	0	na	na	ENST00000367623	ENST00000392043
107431	SE	ENSG00000099204	ABLIM1	chr10,-,116211429,116225456	chr10,-,116211429,116213137__chr10,-,116213241,116225456	coding	120	23	0	2.5	na	na	ENST00000369256	ENST00000392955
107432	SE	ENSG00000099204	ABLIM1	chr10,-,116211429,116225456	chr10,-,116211429,116213137__chr10,-,116222922,116225456	coding	120	10.5	0	2.5	na	na	ENST00000369253	ENST00000369266
137524	MXE	ENSG00000060971	ACAA1	chr3,-,38169356,38170780__chr3,-,38170878,38173416	chr3,-,38169356,38173086__chr3,-,38173128,38173416	coding	72.5	34	2	6	na	na	ENST00000411549	ENST00000447685
137526	SE	ENSG00000060971	ACAA1	chr3,-,38170878,38173416	chr3,-,38170878,38173086__chr3,-,38173128,38173416	non-coding	21	65	4	11.5	na	na	ENST00000440176	ENST00000447223
116619	SE	ENSG00000072778	ACADVL	chr17,+,7123515,7123922	chr17,+,7123515,7123782__chr17,+,7123847,7123922	coding	23	198	0	8.5	na	na	ENST00000322910	ENST00000350303
137057	SE	ENSG00000114331	ACAP2	chr3,-,195015539,195016436	chr3,-,195015539,195015924__chr3,-,195016028,195016436	coding	194	10.5	5	0	na	na	ENST00000326793	ENST00000450200
116421	A3SS	ENSG00000181513	ACBD4	chr17,+,43214820,43215088	chr17,+,43214820,43215126	coding	25	28	1	1	na	na	ENST00000321854	ENST00000398322
146252	A3SS	ENSG00000087085	ACHE	chr7,-,100487955,100488789	chr7,-,100488708,100488789	splice_to_last	11	22	0	0	na	na	ENST00000241069	ENST00000302913
113484	AFE	ENSG00000100813	ACIN1	chr14,-,23538825,23540333	chr14,-,23538825,23547359	coding	185	215	4	12	unknown	unknown	ENST00000397341	ENST00000457657
113485	SE	ENSG00000100813	ACIN1	chr14,-,23538825,23540635	chr14,-,23538825,23540333__chr14,-,23540394,23540635	coding	54	184	0	4	na	na	ENST00000338631	ENST00000357481
113486	AFE	ENSG00000100813	ACIN1	chr14,-,23538825,23540635	chr14,-,23538825,23547359	coding	54	215	0	12	unknown	unknown	ENST00000338631	ENST00000457657
113487	SE	ENSG00000100813	ACIN1	chr14,-,23551044,23559730	chr14,-,23551044,23559190__chr14,-,23559309,23559730	coding	249	167.5	8	15.5	na	na	ENST00000262710	ENST00000457657
117257	SE	ENSG00000131473	ACLY	chr17,-,40049426,40054001	chr17,-,40049426,40052872__chr17,-,40052901,40054001	coding	114	241	6	56	na	na	ENST00000352035	ENST00000353196
129749	ALE	ENSG00000101473	ACOT8	chr20,-,44477313,44483797	chr20,-,44482617,44483797	coding	27	12	6	0	unknown	unknown	ENST00000347763	ENST00000426915
129750	ALE	ENSG00000101473	ACOT8	chr20,-,44477313,44483797	chr20,-,44482622,44483797	coding	27	8	6	0	unknown	unknown	ENST00000347763	ENST00000372531
129752	A3SS	ENSG00000101473	ACOT8	chr20,-,44482617,44483797	chr20,-,44482622,44483797	splice_to_last	12	8	0	0	na	na	ENST00000426915	ENST00000457981
155764	other	ENSG00000161533	ACOX1	chr17,-,73953646,73956295	chr17,-,73953646,73969705	na	17	23	1	2	unknown	unknown	ENST00000293217	ENST00000301608
117605	MXE	ENSG00000161533	ACOX1	chr17,-,73953646,73956295__chr17,-,73956455,73974614	chr17,-,73953646,73969705__chr17,-,73969865,73974614	coding	9	12	0.5	4.5	na	na	ENST00000293217	ENST00000301608
139460	SE	ENSG00000087008	ACOX3	chr4,-,8372720,8376704	chr4,-,8372720,8375287__chr4,-,8375354,8376704	coding	9	21	0	0	na	na	ENST00000356406	ENST00000413009
120211	SE	ENSG00000153093	ACOXL	chr2,+,111691218,111744684	chr2,+,111691218,111721200__chr2,+,111721289,111744684	coding	55	72.5	3	4	Acyl-CoA_Oxase/DH_1	IPR006090	ENST00000283065	ENST00000389811
120213	MXE	ENSG00000153093	ACOXL	chr2,+,111753580,111789203__chr2,+,111789290,111850441	chr2,+,111753580,111806794__chr2,+,111806864,111850441	splice_to_last	30.5	33	5.5	2.5	Acyl-CoA_oxidase_C	IPR002655	ENST00000441974	ENST00000443586
120214	SE	ENSG00000153093	ACOXL	chr2,+,111753580,111806794	chr2,+,111753580,111789203__chr2,+,111789290,111806794	splice_to_last	38	46.5	2	12.5	Acyl-CoA_oxidase_C	IPR002655	ENST00000417074	ENST00000443586
123114	A3SS	ENSG00000143727	ACP1	chr2,+,271938,272036	chr2,+,271938,272191	splice_to_last	263	119	33	21	Tyr_phospatase_low_mol_wt	IPR017867	ENST00000407983	ENST00000439645
123117	MXE	ENSG00000143727	ACP1	chr2,+,271938,272036__chr2,+,272149,275139	chr2,+,271938,272191__chr2,+,272304,275139	coding	158.5	134	60	33	Tyr_phospatase_low_mol_wt	IPR017867	ENST00000272065	ENST00000272067
123118	SE	ENSG00000143727	ACP1	chr2,+,271938,272191	chr2,+,271938,272036__chr2,+,272064,272191	splice_to_last	119	145.5	21	18.5	Tyr_phospatase_low_mol_wt	IPR017867	ENST00000405233	ENST00000439645
122234	SE	ENSG00000123983	ACSL3	chr2,+,223752605,223773450	chr2,+,223752605,223765391__chr2,+,223765497,223773450	non-coding	118	15	2	0	na	na	ENST00000357430	ENST00000392066
134446	A5SS	ENSG00000136518	ACTL6A	chr3,+,179280760,179287611	chr3,+,179280904,179287611	non-coding	34	104	0	29	Actin-like	IPR004000	ENST00000259034	ENST00000450518
113626	MXE	ENSG00000072110	ACTN1	chr14,-,69343956,69345174__chr14,-,69345239,69346678	chr14,-,69343956,69345705__chr14,-,69345785,69346678	coding	13	302	2.5	42.5	na	na	ENST00000193403	ENST00000438964
113627	SE	ENSG00000072110	ACTN1	chr14,-,69343956,69345705	chr14,-,69343956,69345174__chr14,-,69345239,69345705	coding	228	11	29	0.5	na	na	ENST00000193403	ENST00000394419
155846	other	ENSG00000130402	ACTN4	chr19,+,39217742,39218585	chr19,+,39217742,39218955	na	70	20	11	10	unknown	unknown	ENST00000424234	ENST00000440400
118541	MXE	ENSG00000130402	ACTN4	chr19,+,39217742,39218585__chr19,+,39218665,39219635	chr19,+,39217742,39218955__chr19,+,39219020,39219635	coding	39	34.5	6	12.5	EF_hand	IPR018248	ENST00000424234	ENST00000440400
120377	MXE	ENSG00000115091	ACTR3	chr2,+,114647899,114670748__chr2,+,114670803,114684921	chr2,+,114647899,114674460__chr2,+,114674584,114684921	splice_to_last	95.5	55.5	5.5	48	Actin-like	IPR004000	ENST00000443297	ENST00000446821
157627	other	ENSG00000113812	ACTR8	chr3,-,53907172,53909974	chr3,-,53908390,53909974	na	8	76	0	13	unknown	unknown	ENST00000231909	ENST00000335754
113883	SE	ENSG00000168803	ADAL	chr15,+,43638177,43641104	chr15,+,43638177,43639213__chr15,+,43639293,43641104	coding	8	75	0	13.5	A/AMP_deaminase	IPR001365	ENST00000422466	ENST00000428046
100732	A3SS	ENSG00000143537	ADAM15	chr1,+,155033307,155033890	chr1,+,155033307,155033893	coding	49	63	0	0	na	na	ENST00000356955	ENST00000449910
100733	MXE	ENSG00000143537	ADAM15	chr1,+,155033307,155033890__chr1,+,155033964,155034720	chr1,+,155033307,155034379__chr1,+,155034450,155034720	coding	32	34.5	0	0	na	na	ENST00000355956	ENST00000359280
100734	SE	ENSG00000143537	ADAM15	chr1,+,155033307,155034379	chr1,+,155033307,155033890__chr1,+,155033964,155034379	coding	11	106.5	0	0	na	na	ENST00000356955	ENST00000359280
100735	SE	ENSG00000143537	ADAM15	chr1,+,155033307,155034379	chr1,+,155033307,155033893__chr1,+,155033964,155034379	coding	11	113.5	0	0	na	na	ENST00000359280	ENST00000449910
100736	SE	ENSG00000143537	ADAM15	chr1,+,155033307,155034720	chr1,+,155033307,155033890__chr1,+,155033964,155034720	coding	16	32	0	0	na	na	ENST00000271836	ENST00000355956
100737	SE	ENSG00000143537	ADAM15	chr1,+,155033307,155034720	chr1,+,155033307,155033890__chr1,+,155034450,155034720	coding	16	53.5	0	0	na	na	ENST00000271836	ENST00000356955
100738	SE	ENSG00000143537	ADAM15	chr1,+,155033307,155034720	chr1,+,155033307,155033893__chr1,+,155034450,155034720	coding	16	60.5	0	0	na	na	ENST00000271836	ENST00000449910
100739	SE	ENSG00000143537	ADAM15	chr1,+,155033307,155034720	chr1,+,155033307,155034379__chr1,+,155034450,155034720	coding	16	34.5	0	0	na	na	ENST00000271836	ENST00000359280
100740	SE	ENSG00000143537	ADAM15	chr1,+,155033964,155034720	chr1,+,155033964,155034379__chr1,+,155034450,155034720	coding	15	111	0	0	na	na	ENST00000355956	ENST00000449910
121785	ALE	ENSG00000114948	ADAM23	chr2,+,207460885,207470513	chr2,+,207460885,207474633	coding	10	43	0	3	unknown	unknown	ENST00000264377	ENST00000374415
121787	MXE	ENSG00000114948	ADAM23	chr2,+,207460885,207470513__chr2,+,207470603,207482302	chr2,+,207460885,207474633__chr2,+,207474723,207482302	splice_to_last	8.5	41.5	0	4.5	na	na	ENST00000431817	ENST00000451504
121788	SE	ENSG00000114948	ADAM23	chr2,+,207460885,207482302	chr2,+,207460885,207470513__chr2,+,207470603,207482302	splice_to_last	46	8.5	15	0	na	na	ENST00000431817	ENST00000444281
121789	SE	ENSG00000114948	ADAM23	chr2,+,207460885,207482302	chr2,+,207460885,207474633__chr2,+,207474723,207482302	splice_to_last	46	41.5	15	4.5	na	na	ENST00000264377	ENST00000374416
129623	A3SS	ENSG00000149451	ADAM33	chr20,-,3649643,3649945	chr20,-,3649646,3649945	splice_to_last	32	38	1	0	na	na	ENST00000356518	ENST00000379861
150139	SE	ENSG00000160323	ADAMTS13	chr9,+,136305645,136309983	chr9,+,136305645,136307519__chr9,+,136308681,136309983	splice_to_last	14	29	2	0	Thrombospondin_1_rpt	IPR000884	ENST00000338351	ENST00000371916
114643	A3SS	ENSG00000136378	ADAMTS7	chr15,-,79080639,79082030	chr15,-,79080715,79082030	coding	11	112	0	1	na	na	ENST00000438137	ENST00000456326
104053	A5SS	ENSG00000160710	ADAR	chr1,-,154562403,154562659	chr1,-,154562403,154562737	coding	280	87	5	1	na	na	ENST00000368474	ENST00000443129
104054	AFE	ENSG00000160710	ADAR	chr1,-,154575101,154580467	chr1,-,154575101,154600330	coding	25	125	0	0	unknown	unknown	ENST00000368471	ENST00000392506
130564	SE	ENSG00000197381	ADARB1	chr21,+,46548487,46591524	chr21,+,46548487,46554629__chr21,+,46554746,46591524	coding	32	11.5	1	0	na	na	ENST00000389861	ENST00000389862
130567	SE	ENSG00000197381	ADARB1	chr21,+,46603424,46604837	chr21,+,46603424,46604388__chr21,+,46604507,46604837	coding	9	9.5	0	1	A_deamin	IPR002466	ENST00000360697	ENST00000389861
142657	AFE	ENSG00000189007	ADAT2	chr6,-,143759830,143762574	chr6,-,143759830,143771699	coding	11	71	0	2	unknown	unknown	ENST00000237283	ENST00000367594
113262	MXE	ENSG00000063761	ADCK1	chr14,+,78288860,78325418__chr14,+,78325621,78365442	chr14,+,78288860,78353433__chr14,+,78353591,78365442	coding	9.5	68.5	4	0.5	ABC_1	IPR004147	ENST00000341211	ENST00000393639
113263	SE	ENSG00000063761	ADCK1	chr14,+,78288860,78353433	chr14,+,78288860,78325418__chr14,+,78325621,78353433	coding	13	13	1	6.5	ABC_1	IPR004147	ENST00000238561	ENST00000341211
145062	ALE	ENSG00000164742	ADCY1	chr7,+,45701812,45703887	chr7,+,45701812,45717467	coding	8	12	0	3	unknown	unknown	ENST00000297323	ENST00000432715
138673	SE	ENSG00000087274	ADD1	chr4,+,2927838,2929897	chr4,+,2927838,2928368__chr4,+,2928401,2929897	splice_to_last	183	106	8	3.5	na	na	ENST00000355842	ENST00000398129
127799	SE	ENSG00000075340	ADD2	chr2,-,70900137,70901809	chr2,-,70900137,70900372__chr2,-,70900457,70901809	coding	324	11.5	5	5	na	na	ENST00000264436	ENST00000355733
106134	SE	ENSG00000148700	ADD3	chr10,+,111890243,111893083	chr10,+,111890243,111892062__chr10,+,111892157,111893083	splice_to_last	15	286.5	0	44.5	na	na	ENST00000277900	ENST00000356080
107013	AFE	ENSG00000156110	ADK	chr10,+,75911100,75960521	chr10,+,75936643,75960521	coding	21	63	9	0	unknown	unknown	ENST00000286621	ENST00000372734
129853	SE	ENSG00000101126	ADNP	chr20,-,49520537,49547362	chr20,-,49520537,49545187__chr20,-,49545361,49547362	coding	49	136.5	0	4.5	na	na	ENST00000396029	ENST00000396032
114586	A3SS	ENSG00000159322	ADPGK	chr15,-,73045232,73047896	chr15,-,73045235,73047896	splice_to_last	230	224	4	0	na	na	ENST00000450412	ENST00000456471
129110	A5SS	ENSG00000130706	ADRM1	chr20,+,60878100,60878623	chr20,+,60878104,60878623	non-coding	88	486	1	0	na	na	ENST00000253003	ENST00000423787
132214	AFE	ENSG00000100354	ADSL	chr22,+,40552185,40642018	chr22,+,40574143,40642018	coding	24	21	0	61	unknown	unknown	ENST00000335727	ENST00000400140
132215	MXE	ENSG00000100354	ADSL	chr22,+,40658176,40660691__chr22,+,40663039,40669428	chr22,+,40658176,40666125__chr22,+,40666283,40669428	coding	59	17.5	1	0	na	na	ENST00000335727	ENST00000402203
132218	SE	ENSG00000100354	ADSL	chr22,+,40663039,40669428	chr22,+,40663039,40666125__chr22,+,40666283,40669428	coding	61	26	0	0	na	na	ENST00000400140	ENST00000454349
132223	SE	ENSG00000100354	ADSL	chr22,+,40760368,40762439	chr22,+,40760368,40760883__chr22,+,40761059,40762439	splice_to_last	44	255.5	4	83	na	na	ENST00000216194	ENST00000342312
138860	AFE	ENSG00000172493	AFF1	chr4,+,87869722,87967317	chr4,+,87928575,87967317	coding	83	18	2	3	unknown	unknown	ENST00000307808	ENST00000395146
138863	A3SS	ENSG00000172493	AFF1	chr4,+,88053559,88055622	chr4,+,88053559,88055625	coding	347	14	0	0	AF-4	IPR007797	ENST00000307808	ENST00000395146
140442	AFE	ENSG00000072364	AFF4	chr5,-,132272884,132273340	chr5,-,132272884,132298950	coding	12	263	2	0	unknown	unknown	ENST00000339039	ENST00000421773
115462	MXE	ENSG00000223959	AFG3L1	chr16,+,90039172,90044046__chr16,+,90044209,90046649	chr16,+,90039172,90045217__chr16,+,90045285,90046649	non-coding	22	40	1	1	na	na	ENST00000418696	ENST00000429663
115467	SE	ENSG00000223959	AFG3L1	chr16,+,90044209,90046649	chr16,+,90044209,90045217__chr16,+,90045285,90046649	non-coding	35	74	2	6.5	na	na	ENST00000388970	ENST00000418696
115478	A3SS	ENSG00000223959	AFG3L1	chr16,+,90060300,90061100	chr16,+,90060300,90061166	non-coding	19	71	1	0	na	na	ENST00000418696	ENST00000427658
116715	ALE	ENSG00000183077	AFMID	chr17,+,76187140,76193226	chr17,+,76187140,76198579	coding	11	72	1	19	unknown	unknown	ENST00000409431	ENST00000458315
116717	ALE	ENSG00000183077	AFMID	chr17,+,76187140,76193226	chr17,+,76187140,76202991	coding	11	8	1	4	unknown	unknown	ENST00000392388	ENST00000409431
116721	SE	ENSG00000183077	AFMID	chr17,+,76187140,76202991	chr17,+,76187140,76198579__chr17,+,76202130,76202991	splice_to_last	8	201.5	4	40.5	na	na	ENST00000392388	ENST00000458315
116722	SE	ENSG00000183077	AFMID	chr17,+,76187140,76202991	chr17,+,76187140,76198783__chr17,+,76202130,76202991	splice_to_last	8	166.5	4	31	na	na	ENST00000392388	ENST00000409722
116726	SE	ENSG00000183077	AFMID	chr17,+,76198831,76202026	chr17,+,76198831,76201520__chr17,+,76201598,76202026	splice_to_last	46	15	14	2.5	na	na	ENST00000409722	ENST00000458315
116727	SE	ENSG00000183077	AFMID	chr17,+,76201598,76202026	chr17,+,76201598,76201683__chr17,+,76201818,76202026	coding	29	13	5	1	na	na	ENST00000409257	ENST00000458315
116728	SE	ENSG00000183077	AFMID	chr17,+,76201598,76202026	chr17,+,76201598,76201683__chr17,+,76201833,76202026	coding	29	11.5	5	1	na	na	ENST00000327898	ENST00000458315
123842	A3SS	ENSG00000119844	AFTPH	chr2,+,64812678,64819018	chr2,+,64812678,64819021	splice_to_last	75	36	4	4	na	na	ENST00000238855	ENST00000422803
122643	AFE	ENSG00000157985	AGAP1	chr2,+,236403492,236617822	chr2,+,236579700,236617822	coding	23	22	0	0	unknown	unknown	ENST00000304032	ENST00000409538
144435	ALE	ENSG00000133612	AGAP3	chr7,+,150817231,150819811	chr7,+,150817231,150820880	coding	88	102	2	0	unknown	unknown	ENST00000335367	ENST00000428334
144437	SE	ENSG00000133612	AGAP3	chr7,+,150831654,150838984	chr7,+,150831654,150835229__chr7,+,150837202,150838984	coding	11	14.5	0	3	Pleckstrin_homology	IPR001849	ENST00000335355	ENST00000428334
144438	SE	ENSG00000133612	AGAP3	chr7,+,150831654,150838984	chr7,+,150831654,150837065__chr7,+,150837202,150838984	coding	11	14.5	0	3	Pleckstrin_homology	IPR001849	ENST00000397232	ENST00000428334
122308	A3SS	ENSG00000173744	AGFG1	chr2,+,228416832,228418419	chr2,+,228416832,228418425	coding	211	47	4	66	na	na	ENST00000310078	ENST00000409171
142775	A3SS	ENSG00000026652	AGPAT4	chr6,-,161570286,161574377	chr6,-,161570320,161574377	non-coding	21	114	2	6	na	na	ENST00000366908	ENST00000436279
103295	SE	ENSG00000188157	AGRN	chr1,+,986216,986632	chr1,+,986216,986411__chr1,+,986422,986632	coding	142	29	0	0	Laminin_G	IPR001791	ENST00000379364	ENST00000379370
103296	SE	ENSG00000188157	AGRN	chr1,+,987194,989132	chr1,+,987194,987372__chr1,+,988872,989132	coding	295	21	5	0	na	na	ENST00000379364	ENST00000379370
100245	SE	ENSG00000177674	AGTRAP	chr1,+,11805893,11807496	chr1,+,11805893,11806183__chr1,+,11806279,11807496	coding	112	35.5	1	6	Angiotensin_II_typ1_rcpt-rel	IPR013339	ENST00000314340	ENST00000376627
142616	SE	ENSG00000135541	AHI1	chr6,-,135606784,135621637	chr6,-,135606784,135611560__chr6,-,135611662,135621637	coding	16	77	0	6	na	na	ENST00000265602	ENST00000367800
142617	ALE	ENSG00000135541	AHI1	chr6,-,135679324,135715913	chr6,-,135709170,135715913	coding	24	17	5	2	unknown	unknown	ENST00000265602	ENST00000327035
156293	other	ENSG00000173209	AHSA2	chr2,+,61408539,61411846	chr2,+,61410796,61411846	na	169	84	40	1	unknown	unknown	ENST00000357022	ENST00000430934
123770	SE	ENSG00000173209	AHSA2	chr2,+,61412752,61413580	chr2,+,61412752,61413114__chr2,+,61413215,61413580	coding	42	8	14	2.5	Activator_of_Hsp90_ATPase	IPR013538	ENST00000389584	ENST00000430934
157873	other	ENSG00000146416	AIG1	chr6,+,143382202,143382350	chr6,+,143382202,143457971	na	25	55	0	9	unknown	unknown	ENST00000367596	ENST00000367598
114172	SE	ENSG00000170776	AKAP13	chr15,+,86199017,86207793	chr15,+,86199017,86201767__chr15,+,86201820,86207793	coding	20	9	0	0.5	na	na	ENST00000394518	ENST00000458540
114175	A3SS	ENSG00000170776	AKAP13	chr15,+,86260632,86261237	chr15,+,86260632,86261243	coding	9	11	1	3	na	na	ENST00000394518	ENST00000458540
145933	A5SS	ENSG00000127914	AKAP9	chr7,+,91699495,91700218	chr7,+,91699519,91700218	non-coding	8	19	5	0	na	na	ENST00000265737	ENST00000394534
102419	MXE	ENSG00000174574	AKIRIN1	chr1,+,39457271,39463842__chr1,+,39463982,39469018	chr1,+,39457271,39466643__chr1,+,39466777,39469018	coding	322.5	434	8	168.5	na	na	ENST00000372984	ENST00000446189
102421	SE	ENSG00000174574	AKIRIN1	chr1,+,39463982,39469018	chr1,+,39463982,39466643__chr1,+,39466777,39469018	coding	44	502	0	295.5	na	na	ENST00000372975	ENST00000446189
102708	SE	ENSG00000117448	AKR1A1	chr1,+,46016826,46027460	chr1,+,46016826,46018107__chr1,+,46018234,46027460	non-coding	165	111.5	90	11.5	na	na	ENST00000351829	ENST00000372070
119475	AFE	ENSG00000105221	AKT2	chr19,-,40771257,40774490	chr19,-,40771257,40785013	coding	17	108	0	3	unknown	unknown	ENST00000416994	ENST00000427375
119477	AFE	ENSG00000105221	AKT2	chr19,-,40771257,40774490	chr19,-,40771257,40791087	coding	17	30	0	0	unknown	unknown	ENST00000392038	ENST00000416362
155925	other	ENSG00000105221	AKT2	chr19,-,40771257,40774490	chr19,-,40771257,40788123	na	17	104	0	3	unknown	unknown	ENST00000416362	ENST00000423127
119478	AFE	ENSG00000105221	AKT2	chr19,-,40771257,40785013	chr19,-,40771257,40788123	coding	108	104	3	3	unknown	unknown	ENST00000416994	ENST00000456441
119480	AFE	ENSG00000105221	AKT2	chr19,-,40771257,40785013	chr19,-,40771257,40791087	coding	108	30	3	0	unknown	unknown	ENST00000392038	ENST00000416994
119482	AFE	ENSG00000105221	AKT2	chr19,-,40771257,40788123	chr19,-,40771257,40791087	coding	104	30	3	0	unknown	unknown	ENST00000392038	ENST00000423127
135873	SE	ENSG00000023330	ALAS1	chr3,+,52232270,52233225	chr3,+,52232270,52232687__chr3,+,52232863,52233225	non-coding	144	40.5	0	0.5	na	na	ENST00000310271	ENST00000394965
133887	SE	ENSG00000170017	ALCAM	chr3,+,105269102,105271311	chr3,+,105269102,105270987__chr3,+,105271025,105271311	coding	13	150.5	4	4.5	na	na	ENST00000306107	ENST00000389926
140298	SE	ENSG00000164904	ALDH7A1	chr5,-,125896815,125903950	chr5,-,125896815,125898901__chr5,-,125898942,125903950	coding	1385	10.5	12	0	na	na	ENST00000416117	ENST00000437170
140299	ALE	ENSG00000164904	ALDH7A1	chr5,-,125896815,125903950	chr5,-,125900283,125903950	coding	1385	65	12	3	unknown	unknown	ENST00000413020	ENST00000437170
140300	ALE	ENSG00000164904	ALDH7A1	chr5,-,125898942,125903950	chr5,-,125900283,125903950	coding	13	65	0	3	unknown	unknown	ENST00000416117	ENST00000433026
114964	AFE	ENSG00000149925	ALDOA	chr16,+,30075825,30078554	chr16,+,30077247,30078554	coding	1289	3127	94	9	unknown	unknown	ENST00000338110	ENST00000395240
158713	other	ENSG00000119523	ALG2	chr9,-,101981117,101983260	chr9,-,101981117,101983828	na	14	40	0	1	unknown	unknown	ENST00000238477	ENST00000319033
136888	A5SS	ENSG00000214160	ALG3	chr3,-,183963599,183966532	chr3,-,183963599,183966569	splice_to_last	61	50	0	0	na	na	ENST00000397676	ENST00000423996
110378	SE	ENSG00000159063	ALG8	chr11,-,77812240,77815025	chr11,-,77812240,77813919__chr11,-,77813993,77815025	coding	298	14	21	0	na	na	ENST00000299626	ENST00000376156
111318	SE	ENSG00000189046	ALKBH2	chr12,-,109526316,109530311	chr12,-,109526316,109527813__chr12,-,109528011,109530311	coding	18	65.5	1	40	na	na	ENST00000343075	ENST00000440112
119372	AFE	ENSG00000181392	ALKBH6	chr19,-,36504323,36504415	chr19,-,36504323,36505076	coding	38	20	4	1	unknown	unknown	ENST00000252984	ENST00000378875
101723	SE	ENSG00000162551	ALPL	chr1,+,21896866,21902225	chr1,+,21896866,21900157__chr1,+,21900291,21902225	coding	36	959	0	311	Alkaline_phosphatase	IPR001952	ENST00000374830	ENST00000374832
137716	A5SS	ENSG00000178038	ALS2CL	chr3,-,46722896,46722989	chr3,-,46722896,46722993	splice_to_last	21	9	0	7	na	na	ENST00000431015	ENST00000434140
125669	SE	ENSG00000155755	ALS2CR4	chr2,-,202498153,202501470	chr2,-,202498153,202499109__chr2,-,202499615,202501470	coding	247	17	8	0.5	na	na	ENST00000286196	ENST00000444047
109977	MXE	ENSG00000110497	AMBRA1	chr11,-,46515753,46529740__chr11,-,46529919,46563494	chr11,-,46515753,46534276__chr11,-,46534362,46563494	coding	23	16.5	11.5	2.5	na	na	ENST00000298834	ENST00000426438
109979	SE	ENSG00000110497	AMBRA1	chr11,-,46529919,46563494	chr11,-,46529919,46534276__chr11,-,46534362,46563494	coding	34	30	16	3.5	na	na	ENST00000426438	ENST00000458649
109980	SE	ENSG00000110497	AMBRA1	chr11,-,46529919,46563494	chr11,-,46529919,46534276__chr11,-,46539975,46563494	coding	34	14	16	1.5	na	na	ENST00000314823	ENST00000426438
157609	other	ENSG00000145020	AMT	chr3,-,49459004,49459414	chr3,-,49459004,49459536	na	21	286	4	4	unknown	unknown	ENST00000399379	ENST00000414472
138074	MXE	ENSG00000145020	AMT	chr3,-,49459004,49459414__chr3,-,49459481,49459793	chr3,-,49459004,49459536__chr3,-,49459703,49459793	coding	12	157.5	2	3	na	na	ENST00000399379	ENST00000414472
139071	A5SS	ENSG00000164162	ANAPC10	chr4,-,146017262,146019271	chr4,-,146017262,146019282	non-coding	48	38	0	0	na	na	ENST00000309439	ENST00000451299
116772	A5SS	ENSG00000141552	ANAPC11	chr17,+,79849708,79851427	chr17,+,79849716,79851427	non-coding	29	57	1	0	na	na	ENST00000400717	ENST00000448458
116774	A5SS	ENSG00000141552	ANAPC11	chr17,+,79849708,79851427	chr17,+,79849738,79851427	non-coding	29	27	1	0	na	na	ENST00000344877	ENST00000448458
116776	AFE	ENSG00000141552	ANAPC11	chr17,+,79849708,79851427	chr17,+,79849981,79851427	coding	29	65	1	1	unknown	unknown	ENST00000392376	ENST00000448458
116777	SE	ENSG00000141552	ANAPC11	chr17,+,79849708,79852342	chr17,+,79849708,79851427__chr17,+,79851489,79852342	non-coding	22	109.5	0	18	na	na	ENST00000443513	ENST00000448458
116778	A5SS	ENSG00000141552	ANAPC11	chr17,+,79849708,79852342	chr17,+,79849716,79852342	non-coding	22	8	0	0	na	na	ENST00000429613	ENST00000443513
116780	A5SS	ENSG00000141552	ANAPC11	chr17,+,79849708,79852342	chr17,+,79849738,79852342	non-coding	22	16	0	0	na	na	ENST00000392377	ENST00000443513
116783	A5SS	ENSG00000141552	ANAPC11	chr17,+,79849716,79851427	chr17,+,79849738,79851427	non-coding	57	27	0	0	na	na	ENST00000344877	ENST00000400717
116785	AFE	ENSG00000141552	ANAPC11	chr17,+,79849716,79851427	chr17,+,79849981,79851427	coding	57	65	0	1	unknown	unknown	ENST00000392376	ENST00000400717
116786	SE	ENSG00000141552	ANAPC11	chr17,+,79849716,79852342	chr17,+,79849716,79851427__chr17,+,79851489,79852342	non-coding	8	123.5	0	17.5	na	na	ENST00000400717	ENST00000429613
116787	A5SS	ENSG00000141552	ANAPC11	chr17,+,79849716,79852342	chr17,+,79849738,79852342	non-coding	8	16	0	0	na	na	ENST00000392377	ENST00000429613
116790	AFE	ENSG00000141552	ANAPC11	chr17,+,79849738,79851427	chr17,+,79849981,79851427	coding	27	65	0	1	unknown	unknown	ENST00000344877	ENST00000392376
116791	SE	ENSG00000141552	ANAPC11	chr17,+,79849738,79852342	chr17,+,79849738,79851427__chr17,+,79851489,79852342	non-coding	16	108.5	0	17.5	na	na	ENST00000344877	ENST00000392377
138465	SE	ENSG00000145362	ANK2	chr4,+,114271404,114281978	chr4,+,114271404,114274200__chr4,+,114280454,114281978	coding	24	9	0	0	Death	IPR000488	ENST00000361149	ENST00000394537
138466	SE	ENSG00000145362	ANK2	chr4,+,114290960,114294245	chr4,+,114290960,114293688__chr4,+,114293780,114294245	coding	90	15	19	0	na	na	ENST00000264366	ENST00000446324
108142	SE	ENSG00000151150	ANK3	chr10,-,61840375,61842372	chr10,-,61840375,61841907__chr10,-,61841933,61842372	coding	57	10.5	54	2.5	na	na	ENST00000355288	ENST00000373820
108147	AFE	ENSG00000151150	ANK3	chr10,-,61898844,61900109	chr10,-,61898844,61905725	coding	40	22	11	0	unknown	unknown	ENST00000355288	ENST00000395299
112368	SE	ENSG00000088448	ANKRD10	chr13,-,111545609,111558379	chr13,-,111545609,111546455__chr13,-,111546548,111558379	coding	14	103	3	48.5	na	na	ENST00000267339	ENST00000310847
117958	SE	ENSG00000101745	ANKRD12	chr18,+,9195695,9208654	chr18,+,9195695,9204473__chr18,+,9204541,9208654	coding	53	38	1	0.5	na	na	ENST00000262126	ENST00000383440
110562	A3SS	ENSG00000076513	ANKRD13A	chr12,+,110463627,110465509	chr12,+,110463627,110465512	non-coding	33	12	0	12	na	na	ENST00000261738	ENST00000334689
110563	MXE	ENSG00000076513	ANKRD13A	chr12,+,110467439,110468449__chr12,+,110468562,110474065	chr12,+,110467439,110471601__chr12,+,110471761,110474065	coding	25.5	16	0	24.5	na	na	ENST00000261738	ENST00000334689
109362	SE	ENSG00000172932	ANKRD13D	chr11,+,67057020,67057548	chr11,+,67057020,67057299__chr11,+,67057435,67057548	coding	21	16.5	0	0.5	na	na	ENST00000308440	ENST00000447274
139405	SE	ENSG00000132466	ANKRD17	chr4,-,74000981,74007457	chr4,-,74000981,74005247__chr4,-,74005999,74007457	coding	70	123	0	0	na	na	ENST00000330838	ENST00000358602
107743	AFE	ENSG00000107890	ANKRD26	chr10,-,27337907,27339987	chr10,-,27337907,27342248	coding	10	19	0	0	unknown	unknown	ENST00000376070	ENST00000419811
122143	MXE	ENSG00000163516	ANKZF1	chr2,+,220094621,220094949__chr2,+,220095071,220096981	chr2,+,220094621,220096649__chr2,+,220096761,220096981	coding	23.5	111	1	1	na	na	ENST00000419723	ENST00000453432
122144	MXE	ENSG00000163516	ANKZF1	chr2,+,220094621,220094949__chr2,+,220095126,220096981	chr2,+,220094621,220096649__chr2,+,220096761,220096981	splice_to_last	23.5	111	1	1	na	na	ENST00000435521	ENST00000453432
144921	SE	ENSG00000011426	ANLN	chr7,+,36455492,36458852	chr7,+,36455492,36456688__chr7,+,36456798,36458852	coding	40	132.5	4	28	na	na	ENST00000265748	ENST00000396068
144922	A3SS	ENSG00000011426	ANLN	chr7,+,36459922,36460205	chr7,+,36459922,36460220	coding	91	8	3	11	na	na	ENST00000396068	ENST00000446635
144923	SE	ENSG00000011426	ANLN	chr7,+,36466636,36478812	chr7,+,36466636,36467915__chr7,+,36467968,36478812	coding	63	11	2	2.5	na	na	ENST00000428612	ENST00000457743
137646	SE	ENSG00000160746	ANO10	chr3,-,43408465,43591211	chr3,-,43408465,43474102__chr3,-,43474218,43591211	coding	19	551	0	6	na	na	ENST00000396092	ENST00000414522
137647	SE	ENSG00000160746	ANO10	chr3,-,43408465,43591211	chr3,-,43408465,43474102__chr3,-,43474220,43591211	coding	19	337.5	0	6	na	na	ENST00000414522	ENST00000451430
103843	A3SS	ENSG00000143401	ANP32E	chr1,-,150193059,150195511	chr1,-,150193062,150195511	splice_to_last	30	257	67	0	na	na	ENST00000369114	ENST00000369115
103847	MXE	ENSG00000143401	ANP32E	chr1,-,150199126,150201404__chr1,-,150201569,150204114	chr1,-,150199126,150202905__chr1,-,150203027,150204114	coding	283.5	1420	59.5	68.5	na	na	ENST00000421169	ENST00000436748
103848	SE	ENSG00000143401	ANP32E	chr1,-,150199126,150202905	chr1,-,150199126,150201404__chr1,-,150201569,150202905	coding	9	691	3	293.5	na	na	ENST00000369119	ENST00000421169
123888	ALE	ENSG00000169604	ANTXR1	chr2,+,69351774,69372457	chr2,+,69351774,69379300	coding	25	274	0	0	unknown	unknown	ENST00000308181	ENST00000409829
108350	SE	ENSG00000122359	ANXA11	chr10,-,81932624,81965098	chr10,-,81932624,81932979__chr10,-,81935910,81965098	coding	96	21	9	1.5	na	na	ENST00000372231	ENST00000445524
108351	SE	ENSG00000122359	ANXA11	chr10,-,81932624,81965098	chr10,-,81932624,81935862__chr10,-,81935910,81965098	coding	96	103.5	9	4	na	na	ENST00000372231	ENST00000372234
108352	SE	ENSG00000122359	ANXA11	chr10,-,81932624,81965098	chr10,-,81932624,81935862__chr10,-,81940891,81965098	coding	96	83	9	3	na	na	ENST00000372231	ENST00000438331
114498	AFE	ENSG00000182718	ANXA2P1	chr15,-,60678284,60689456	chr15,-,60678284,60690069	coding	33	16	19	2	unknown	unknown	ENST00000332680	ENST00000421017
140622	SE	ENSG00000197043	ANXA6	chr5,-,150489406,150496687	chr5,-,150489406,150490187__chr5,-,150490204,150496687	coding	83	51	2	0	na	na	ENST00000354546	ENST00000356496
132955	SE	ENSG00000100280	AP1B1	chr22,-,29724883,29726366	chr22,-,29724883,29725700__chr22,-,29725708,29726366	coding	238	22	10	0	na	na	ENST00000356015	ENST00000402502
117106	SE	ENSG00000006114	AP1GBP1	chr17,-,35879173,35880640	chr17,-,35879173,35880281__chr17,-,35880316,35880640	coding	11	38	0	8	na	na	ENST00000345615	ENST00000346661
117107	SE	ENSG00000006114	AP1GBP1	chr17,-,35936515,35944755	chr17,-,35936515,35937477__chr17,-,35937710,35944755	coding	9	28.5	8	9	na	na	ENST00000339208	ENST00000345615
117108	SE	ENSG00000006114	AP1GBP1	chr17,-,35936515,35944755	chr17,-,35936515,35937477__chr17,-,35939529,35944755	coding	9	21	8	5	na	na	ENST00000339208	ENST00000394379
143878	AFE	ENSG00000106367	AP1S1	chr7,+,100797797,100799874	chr7,+,100797932,100799874	coding	85	12	1	0	unknown	unknown	ENST00000337619	ENST00000429457
153549	SE	ENSG00000182287	AP1S2	chrX,-,15845494,15863501	chrX,-,15845494,15858619__chrX,-,15858713,15863501	coding	52	34	91	0.5	na	na	ENST00000329235	ENST00000452376
153550	ALE	ENSG00000182287	AP1S2	chrX,-,15845494,15863501	chrX,-,15849690,15863501	coding	52	183	91	13	unknown	unknown	ENST00000329235	ENST00000450644
153551	ALE	ENSG00000182287	AP1S2	chrX,-,15845494,15863501	chrX,-,15851129,15863501	coding	52	44	91	27	unknown	unknown	ENST00000329235	ENST00000380291
153553	A3SS	ENSG00000182287	AP1S2	chrX,-,15849690,15863501	chrX,-,15851129,15863501	splice_to_last	183	44	13	27	na	na	ENST00000380291	ENST00000450644
153555	ALE	ENSG00000182287	AP1S2	chrX,-,15849690,15863501	chrX,-,15858713,15863501	coding	183	68	13	1	unknown	unknown	ENST00000450644	ENST00000452376
153556	ALE	ENSG00000182287	AP1S2	chrX,-,15851129,15863501	chrX,-,15858713,15863501	coding	44	68	27	1	unknown	unknown	ENST00000340245	ENST00000380291
109541	A3SS	ENSG00000183020	AP2A2	chr11,+,984752,985431	chr11,+,984752,985434	coding	26	74	0	2	Clathrin/coatomer_adapt-like_N	IPR002553	ENST00000332231	ENST00000448903
134492	SE	ENSG00000161203	AP2M1	chr3,+,183898038,183898636	chr3,+,183898038,183898432__chr3,+,183898437,183898636	coding	38	42	564	4	na	na	ENST00000292807	ENST00000382456
134493	SE	ENSG00000161203	AP2M1	chr3,+,183898038,183898636	chr3,+,183898038,183898432__chr3,+,183898528,183898636	splice_to_last	38	76.5	564	0	na	na	ENST00000382456	ENST00000431779
108291	SE	ENSG00000185009	AP3M1	chr10,-,75898139,75910512	chr10,-,75898139,75898563__chr10,-,75898688,75910512	coding	23	134	0	5	na	na	ENST00000355264	ENST00000372745
146157	SE	ENSG00000221838	AP4M1	chr7,+,99699590,99700297	chr7,+,99699590,99699868__chr7,+,99700015,99700297	coding	64	8.5	4	0	na	na	ENST00000394061	ENST00000445208
146161	SE	ENSG00000221838	AP4M1	chr7,+,99699590,99701031	chr7,+,99699590,99699868__chr7,+,99700582,99701031	coding	9	39	0	0	Clathrin_sigma/coatomer_zeta	IPR000804	ENST00000394061	ENST00000438383
146162	SE	ENSG00000221838	AP4M1	chr7,+,99699590,99701031	chr7,+,99699590,99700297__chr7,+,99700368,99701031	coding	9	32	0	2	Clathrin_sigma/coatomer_zeta	IPR000804	ENST00000438383	ENST00000439416
146163	SE	ENSG00000221838	AP4M1	chr7,+,99699590,99701031	chr7,+,99699590,99700297__chr7,+,99700403,99701031	splice_to_last	9	33	0	2	Clathrin_sigma/coatomer_zeta	IPR000804	ENST00000438383	ENST00000445208
146164	SE	ENSG00000221838	AP4M1	chr7,+,99699590,99701031	chr7,+,99699590,99700297__chr7,+,99700582,99701031	coding	9	71	0	2	Clathrin_sigma/coatomer_zeta	IPR000804	ENST00000438383	ENST00000446007
146166	MXE	ENSG00000221838	AP4M1	chr7,+,99700403,99700486__chr7,+,99700554,99701234	chr7,+,99700403,99701031__chr7,+,99701141,99701234	coding	25.5	35.5	0	2.5	Clathrin_sigma/coatomer_zeta	IPR000804	ENST00000433787	ENST00000445208
111238	SE	ENSG00000120868	APAF1	chr12,+,99093346,99100262	chr12,+,99093346,99097148__chr12,+,99097276,99100262	coding	18	23	1	2	WD40_repeat	IPR001680	ENST00000357310	ENST00000359972
139331	SE	ENSG00000163697	APBB2	chr4,-,40936715,40946881	chr4,-,40936715,40937093__chr4,-,40937155,40946881	coding	42	119.5	7	7.5	na	na	ENST00000295974	ENST00000316212
139535	AFE	ENSG00000134982	APC	chr5,+,112043578,112090569	chr5,+,112073621,112090569	coding	18	13	0	0	unknown	unknown	ENST00000257430	ENST00000457016
135693	SE	ENSG00000164062	APEH	chr3,+,49711845,49713126	chr3,+,49711845,49711921__chr3,+,49712053,49713126	splice_to_last	8	129.5	0	0	na	na	ENST00000446089	ENST00000447436
135694	SE	ENSG00000164062	APEH	chr3,+,49711845,49713126	chr3,+,49711845,49711921__chr3,+,49712741,49713126	coding	8	203.5	0	4.5	na	na	ENST00000415572	ENST00000446089
135697	MXE	ENSG00000164062	APEH	chr3,+,49713398,49713488__chr3,+,49713651,49714041	chr3,+,49713398,49713810__chr3,+,49713947,49714041	coding	85	194.5	1	8.5	na	na	ENST00000446089	ENST00000447541
112893	A5SS	ENSG00000100823	APEX1	chr14,+,20923486,20923736	chr14,+,20923496,20923736	non-coding	32	145	41	6	na	na	ENST00000398030	ENST00000442613
112895	A5SS	ENSG00000100823	APEX1	chr14,+,20923486,20923736	chr14,+,20923552,20923736	non-coding	32	305	41	24	na	na	ENST00000216714	ENST00000442613
112897	A5SS	ENSG00000100823	APEX1	chr14,+,20923496,20923736	chr14,+,20923552,20923736	non-coding	145	305	6	24	na	na	ENST00000216714	ENST00000398030
103852	MXE	ENSG00000117362	APH1A	chr1,-,150239877,150240115__chr1,-,150240188,150241097	chr1,-,150239877,150240356__chr1,-,150240526,150241097	coding	111	27.5	52	0	na	na	ENST00000236017	ENST00000433443
114029	SE	ENSG00000138613	APH1B	chr15,+,63578826,63594543	chr15,+,63578826,63579622__chr15,+,63579744,63594543	coding	8	33.5	0	0.5	Aph-1	IPR009294	ENST00000261879	ENST00000380343
109008	A3SS	ENSG00000166181	API5L1	chr11,+,43357543,43363977	chr11,+,43357543,43363982	splice_to_last	86	9	2	6	API5	IPR008383	ENST00000378852	ENST00000455725
109949	AFE	ENSG00000149089	APIP	chr11,-,34916656,34918307	chr11,-,34916656,34937774	coding	20	43	1	10	unknown	unknown	ENST00000278359	ENST00000395787
108716	SE	ENSG00000084234	APLP2	chr11,+,129992407,129996594	chr11,+,129992407,129993506__chr11,+,129993673,129996594	coding	1387	552.5	21	3.5	Prot_inh_Kunz-m	IPR002223	ENST00000278756	ENST00000338167
108717	SE	ENSG00000084234	APLP2	chr11,+,130005609,130010292	chr11,+,130005609,130007150__chr11,+,130007185,130010292	coding	2447	254	0	0	na	na	ENST00000263574	ENST00000278756
109639	SE	ENSG00000118137	APOA1	chr11,-,116707126,116708060	chr11,-,116707126,116707716__chr11,-,116707872,116708060	coding	12	13703	0	9	na	na	ENST00000236850	ENST00000375329
109643	A5SS	ENSG00000118137	APOA1	chr11,-,116708122,116708274	chr11,-,116708122,116708320	non-coding	19	88	0	1	na	na	ENST00000236850	ENST00000359492
132179	AFE	ENSG00000179750	APOBEC3C	chr22,+,39378474,39411599	chr22,+,39410383,39411599	coding	185	56	0	3	unknown	unknown	ENST00000361441	ENST00000396752
157059	other	ENSG00000179750	APOBEC3C	chr22,+,39378474,39411599	chr22,+,39378474,39418826	na	185	15	0	0	unknown	unknown	ENST00000396752	ENST00000427494
132180	AFE	ENSG00000179750	APOBEC3C	chr22,+,39378474,39418826	chr22,+,39417540,39418826	coding	15	29	0	0	unknown	unknown	ENST00000381568	ENST00000427494
118678	A3SS	ENSG00000130203	APOE	chr19,+,45409097,45409843	chr19,+,45409097,45409858	non-coding	18	1499	0	5	na	na	ENST00000252486	ENST00000446996
118679	A5SS	ENSG00000130203	APOE	chr19,+,45409097,45409858	chr19,+,45409179,45409858	non-coding	1499	35	5	2	na	na	ENST00000252486	ENST00000434152
153609	A3SS	ENSG00000184831	APOO	chrX,-,23851626,23858429	chrX,-,23851728,23858429	non-coding	49	93	8	11	na	na	ENST00000379220	ENST00000439528
130731	MXE	ENSG00000142192	APP	chr21,-,27354789,27369674__chr21,-,27369730,27394155	chr21,-,27354789,27372329__chr21,-,27372496,27394155	coding	1239.5	1019	17	49.5	na	na	ENST00000359726	ENST00000440126
130732	SE	ENSG00000142192	APP	chr21,-,27354789,27372329	chr21,-,27354789,27369674__chr21,-,27369730,27372329	coding	1138	2331.5	26	51.5	na	na	ENST00000357903	ENST00000358918
130733	SE	ENSG00000142192	APP	chr21,-,27354789,27394155	chr21,-,27354789,27369674__chr21,-,27369730,27394155	coding	115	1239.5	0	17	na	na	ENST00000348990	ENST00000359726
130734	SE	ENSG00000142192	APP	chr21,-,27354789,27394155	chr21,-,27354789,27369674__chr21,-,27372496,27394155	coding	115	1686	0	53.5	na	na	ENST00000348990	ENST00000439274
130735	SE	ENSG00000142192	APP	chr21,-,27354789,27394155	chr21,-,27354789,27372329__chr21,-,27372496,27394155	coding	115	1019	0	49.5	na	na	ENST00000348990	ENST00000440126
115942	A3SS	ENSG00000198931	APRT	chr16,-,88876113,88876477	chr16,-,88876247,88876477	splice_to_last	189	326	69	33	na	na	ENST00000378364	ENST00000426324
151262	A3SS	ENSG00000137074	APTX	chr9,-,32973649,32974455	chr9,-,32973685,32974455	splice_to_last	204	15	68	2	na	na	ENST00000309615	ENST00000397172
151268	A3SS	ENSG00000137074	APTX	chr9,-,32987728,32988080	chr9,-,32987843,32988080	non-coding	58	84	2	0	na	na	ENST00000344355	ENST00000379824
151269	SE	ENSG00000137074	APTX	chr9,-,32987728,32989756	chr9,-,32987728,32988080__chr9,-,32988126,32989756	coding	37	60.5	8	1	na	na	ENST00000379824	ENST00000397172
158759	other	ENSG00000137074	APTX	chr9,-,32987728,32989756	chr9,-,32988121,32989756	na	37	77	8	17	unknown	unknown	ENST00000397172	ENST00000420767
151270	A3SS	ENSG00000137074	APTX	chr9,-,32988121,32989756	chr9,-,32988126,32989756	non-coding	77	63	17	0	na	na	ENST00000379812	ENST00000420767
110325	SE	ENSG00000186635	ARAP1	chr11,-,72414123,72416849	chr11,-,72414123,72415196__chr11,-,72415378,72416849	coding	12	75	0	3	na	na	ENST00000426523	ENST00000429686
101855	A5SS	ENSG00000143761	ARF1	chr1,+,228270465,228284778	chr1,+,228270550,228284778	non-coding	320	13	4	0	na	na	ENST00000272102	ENST00000327482
133668	SE	ENSG00000100266	ARFGAP3	chr22,-,43204895,43213147	chr22,-,43204895,43206818__chr22,-,43206949,43213147	non-coding	32	86	1	7.5	na	na	ENST00000440262	ENST00000452960
133669	MXE	ENSG00000100266	ARFGAP3	chr22,-,43227641,43230247__chr22,-,43230330,43236949	chr22,-,43227641,43231367__chr22,-,43231498,43236949	coding	66.5	30	6	0.5	na	na	ENST00000437119	ENST00000456251
138552	A5SS	ENSG00000164144	ARFIP1	chr4,+,153701242,153750776	chr4,+,153701377,153750776	non-coding	24	26	27	9	na	na	ENST00000353617	ENST00000405727
138556	SE	ENSG00000164144	ARFIP1	chr4,+,153784865,153793603	chr4,+,153784865,153791904__chr4,+,153791999,153793603	coding	104	53	1	2.5	na	na	ENST00000353617	ENST00000356064
112365	SE	ENSG00000134884	ARGLU1	chr13,-,107209478,107211779	chr13,-,107209478,107209906__chr13,-,107209963,107211779	coding	168	33.5	48	3	na	na	ENST00000375926	ENST00000400198
138540	SE	ENSG00000071205	ARHGAP10	chr4,+,148968201,148985566	chr4,+,148968201,148984298__chr4,+,148984450,148985566	coding	50	20	0	2	na	na	ENST00000336498	ENST00000414545
107781	SE	ENSG00000165322	ARHGAP12	chr10,-,32120727,32132388	chr10,-,32120727,32128232__chr10,-,32128638,32132388	coding	19	33.5	1	15.5	na	na	ENST00000375250	ENST00000396144
107782	SE	ENSG00000165322	ARHGAP12	chr10,-,32120727,32132388	chr10,-,32120727,32128564__chr10,-,32128638,32132388	coding	19	35.5	1	16	na	na	ENST00000311380	ENST00000375250
107784	SE	ENSG00000165322	ARHGAP12	chr10,-,32141524,32150322	chr10,-,32141524,32142993__chr10,-,32143133,32150322	coding	86	113.5	6	4.5	na	na	ENST00000375250	ENST00000396144
115612	SE	ENSG00000140750	ARHGAP17	chr16,-,24946959,24953307	chr16,-,24946959,24950684__chr16,-,24950917,24953307	coding	56	87	1	2.5	na	na	ENST00000303665	ENST00000455311
139802	A5SS	ENSG00000145819	ARHGAP26	chr5,+,142586872,142593561	chr5,+,142587037,142593561	non-coding	16	10	0	2	na	na	ENST00000421521	ENST00000449681
113048	A3SS	ENSG00000100852	ARHGAP5	chr14,+,32563591,32586345	chr14,+,32563591,32586348	coding	48	62	0	5	na	na	ENST00000345122	ENST00000432921
111817	SE	ENSG00000123329	ARHGAP9	chr12,-,57866470,57867824	chr12,-,57866470,57867385__chr12,-,57867490,57867824	coding	10	19.5	0	1.5	na	na	ENST00000393791	ENST00000424809
114997	A3SS	ENSG00000167930	ARHGDIG	chr16,+,309597,309967	chr16,+,309597,309994	coding	343	17	3	12	na	na	ENST00000449945	ENST00000453430
118634	AFE	ENSG00000076928	ARHGEF1	chr19,+,42387355,42392134	chr19,+,42388559,42392134	coding	8	35	0	0	unknown	unknown	ENST00000337665	ENST00000354532
118635	SE	ENSG00000076928	ARHGEF1	chr19,+,42392935,42396401	chr19,+,42392935,42396095__chr19,+,42396193,42396401	coding	19	53	0	0.5	Regulat_G_prot_signal-like	IPR015212	ENST00000337665	ENST00000378152
148695	A3SS	ENSG00000104728	ARHGEF10	chr8,+,1808349,1812535	chr8,+,1808349,1812538	coding	166	270	4	30	na	na	ENST00000262112	ENST00000349830
148700	SE	ENSG00000104728	ARHGEF10	chr8,+,1824899,1830800	chr8,+,1824899,1828213__chr8,+,1828329,1830800	coding	435	44.5	3	3.5	na	na	ENST00000262112	ENST00000382794
148704	SE	ENSG00000104728	ARHGEF10	chr8,+,1873569,1876592	chr8,+,1873569,1874542__chr8,+,1874628,1876592	coding	13	88	16	14	na	na	ENST00000262112	ENST00000349830
101216	SE	ENSG00000074964	ARHGEF10L	chr1,+,17934471,17942588	chr1,+,17934471,17939552__chr1,+,17939668,17942588	coding	84	56	1	2.5	na	na	ENST00000361221	ENST00000375415
104195	SE	ENSG00000132694	ARHGEF11	chr1,-,156939834,156946774	chr1,-,156939834,156941488__chr1,-,156941607,156946774	coding	47	58	3	4.5	na	na	ENST00000315174	ENST00000361409
153869	SE	ENSG00000131089	ARHGEF9	chrX,-,62875616,62893917	chrX,-,62875616,62885765__chrX,-,62885896,62893917	coding	19	139.5	1	24	na	na	ENST00000374878	ENST00000437457
141293	SE	ENSG00000049618	ARID1B	chr6,+,157495250,157502102	chr6,+,157495250,157495980__chr6,+,157496138,157502102	coding	134	47	9	12	na	na	ENST00000275248	ENST00000350026
105043	SE	ENSG00000054267	ARID4B	chr1,-,235359429,235383107	chr1,-,235359429,235377083__chr1,-,235377340,235383107	coding	13	79	0	5	na	na	ENST00000349213	ENST00000391856
135604	MXE	ENSG00000177479	ARIH2	chr3,+,48956430,48960180__chr3,+,48960243,48964894	chr3,+,48956430,48962150__chr3,+,48962271,48964894	non-coding	42	19	2	0	na	na	ENST00000430423	ENST00000447082
135612	SE	ENSG00000177479	ARIH2	chr3,+,48960243,48964894	chr3,+,48960243,48962150__chr3,+,48962271,48964894	non-coding	33	24.5	4	0	na	na	ENST00000356401	ENST00000449376
135615	SE	ENSG00000177479	ARIH2	chr3,+,48965245,48999044	chr3,+,48965245,48982568__chr3,+,48982613,48999044	splice_to_last	97	28.5	16	1.5	na	na	ENST00000420814	ENST00000452385
144189	A3SS	ENSG00000122644	ARL4A	chr7,+,12726667,12727790	chr7,+,12726667,12727793	non-coding	73	25	3	23	na	na	ENST00000356797	ENST00000396664
110677	A3SS	ENSG00000182196	ARL6IP4	chr12,+,123465812,123466117	chr12,+,123465812,123466141	coding	25	273	19	146	na	na	ENST00000392435	ENST00000454885
110678	A3SS	ENSG00000182196	ARL6IP4	chr12,+,123465845,123466117	chr12,+,123465845,123466141	coding	12	50	0	1	na	na	ENST00000315580	ENST00000453766
118325	AFE	ENSG00000105676	ARMC6	chr19,+,19144738,19153519	chr19,+,19145046,19153519	coding	45	19	0	0	unknown	unknown	ENST00000392335	ENST00000392336
122377	AFE	ENSG00000135931	ARMC9	chr2,+,232063411,232070910	chr2,+,232063654,232070910	coding	9	13	1	3	unknown	unknown	ENST00000349938	ENST00000440107
152908	A5SS	ENSG00000184867	ARMCX2	chrX,-,100913127,100913446	chrX,-,100913127,100913477	non-coding	95	92	16	9	na	na	ENST00000328766	ENST00000330154
152914	A3SS	ENSG00000184867	ARMCX2	chrX,-,100914121,100914404	chrX,-,100914133,100914404	non-coding	52	105	33	0	na	na	ENST00000431597	ENST00000458024
152918	SE	ENSG00000184867	ARMCX2	chrX,-,100914133,100914742	chrX,-,100914133,100914393__chrX,-,100914486,100914742	non-coding	8	51	0	2.5	na	na	ENST00000413506	ENST00000440675
152919	SE	ENSG00000184867	ARMCX2	chrX,-,100914133,100914742	chrX,-,100914133,100914404__chrX,-,100914486,100914742	non-coding	8	102	0	2.5	na	na	ENST00000356824	ENST00000413506
151741	A3SS	ENSG00000102401	ARMCX3	chrX,+,100878265,100878775	chrX,+,100878265,100878803	non-coding	10	58	1	4	na	na	ENST00000341189	ENST00000407856
151765	SE	ENSG00000125962	ARMCX5	chrX,+,101854774,101856391	chrX,+,101854774,101855847__chrX,+,101855959,101856391	non-coding	65	33.5	2	3	na	na	ENST00000246174	ENST00000395085
103871	SE	ENSG00000143437	ARNT	chr1,-,150812129,150818738	chr1,-,150812129,150814899__chr1,-,150814943,150818738	coding	25	27.5	0	1	na	na	ENST00000322733	ENST00000354396
110808	SE	ENSG00000029153	ARNTL2	chr12,+,27521344,27533179	chr12,+,27521344,27523061__chr12,+,27523162,27533179	coding	36	39	2	1	HLH_basic	IPR001092	ENST00000311001	ENST00000395901
110809	SE	ENSG00000029153	ARNTL2	chr12,+,27521344,27533179	chr12,+,27521344,27523061__chr12,+,27529319,27533179	coding	36	33.5	2	0.5	HLH_basic	IPR001092	ENST00000266503	ENST00000395901
136110	SE	ENSG00000214021	ARPC4	chr3,+,9839460,9841868	chr3,+,9839460,9841562__chr3,+,9841750,9841868	coding	678	16.5	27	14	na	na	ENST00000287613	ENST00000417500
136116	SE	ENSG00000214021	ARPC4	chr3,+,9841979,9845526	chr3,+,9841979,9843344__chr3,+,9843439,9845526	coding	8	1118	3	357	ARPC4	IPR008384	ENST00000397261	ENST00000453882
136117	SE	ENSG00000214021	ARPC4	chr3,+,9841979,9845526	chr3,+,9841979,9843344__chr3,+,9845390,9845526	coding	8	846.5	3	77	ARPC4	IPR008384	ENST00000440787	ENST00000453882
122790	MXE	ENSG00000065802	ASB1	chr2,+,239335759,239342194__chr2,+,239342335,239352982	chr2,+,239335759,239344351__chr2,+,239344653,239352982	coding	13.5	26.5	0	2	ANK	IPR002110	ENST00000409297	ENST00000438264
108227	AFE	ENSG00000138303	ASCC1	chr10,-,73973088,73975539	chr10,-,73973088,73975964	coding	63	42	1	2	unknown	unknown	ENST00000317168	ENST00000394919
142311	ALE	ENSG00000112249	ASCC3	chr6,-,101296582,101311939	chr6,-,101307077,101311939	coding	70	37	0	11	unknown	unknown	ENST00000324723	ENST00000369162
148859	AFE	ENSG00000129691	ASH2L	chr8,+,37963255,37963895	chr8,+,37963656,37963895	coding	50	139	0	12	unknown	unknown	ENST00000250635	ENST00000428278
148860	SE	ENSG00000129691	ASH2L	chr8,+,37991063,37996333	chr8,+,37991063,37993185__chr8,+,37993283,37996333	coding	13	786.5	1	44.5	SPla/RYanodine_receptor_sg	IPR018355	ENST00000250635	ENST00000428278
145284	SE	ENSG00000126522	ASL	chr7,+,65592726,65599266	chr7,+,65592726,65595113__chr7,+,65595828,65599266	coding	16	19.5	0	4.5	RNA_pol_II_Rpb4_core	IPR006590	ENST00000338592	ENST00000360415
145285	SE	ENSG00000126522	ASL	chr7,+,65592726,65599266	chr7,+,65592726,65595730__chr7,+,65595828,65599266	coding	16	71.5	0	7	RNA_pol_II_Rpb4_core	IPR006590	ENST00000395326	ENST00000431089
153546	MXE	ENSG00000169093	ASMTL	chrX,-,1553975,1554586__chrX,-,1554650,1561078	chrX,-,1553975,1557989__chrX,-,1558036,1561078	coding	14.5	27	2	0.5	na	na	ENST00000381333	ENST00000416733
148428	SE	ENSG00000070669	ASNS	chr7,-,97499124,97501662	chr7,-,97499124,97501030__chr7,-,97501307,97501662	coding	184	11	9	3	na	na	ENST00000175506	ENST00000394308
121225	A3SS	ENSG00000138381	ASNSD1	chr2,+,190528679,190530101	chr2,+,190528679,190530147	non-coding	166	19	31	1	na	na	ENST00000260952	ENST00000425590
149434	ALE	ENSG00000198363	ASPH	chr8,-,62531577,62546241	chr8,-,62538838,62546241	coding	135	542	0	2	unknown	unknown	ENST00000356457	ENST00000379454
149441	SE	ENSG00000198363	ASPH	chr8,-,62557190,62563608	chr8,-,62557190,62559308__chr8,-,62559436,62563608	coding	17	311	1	22	na	na	ENST00000379451	ENST00000389213
156674	other	ENSG00000179818	ASPRV1	chr2,-,70278436,70282845	chr2,-,70278436,70310669	na	8	8	2	1	unknown	unknown	ENST00000411429	ENST00000416068
127638	SE	ENSG00000179818	ASPRV1	chr2,-,70278436,70312678	chr2,-,70278436,70280862__chr2,-,70286811,70312678	non-coding	28	8.5	9	0.5	na	na	ENST00000415060	ENST00000415222
127639	SE	ENSG00000179818	ASPRV1	chr2,-,70278436,70312678	chr2,-,70278436,70280862__chr2,-,70310818,70312678	non-coding	28	19	9	8.5	na	na	ENST00000415222	ENST00000421255
127640	SE	ENSG00000179818	ASPRV1	chr2,-,70278436,70312678	chr2,-,70278436,70282073__chr2,-,70310818,70312678	non-coding	28	16.5	9	8	na	na	ENST00000415222	ENST00000435880
127641	SE	ENSG00000179818	ASPRV1	chr2,-,70278436,70312678	chr2,-,70278436,70282845__chr2,-,70286811,70312678	non-coding	28	10	9	1	na	na	ENST00000415222	ENST00000416068
127643	SE	ENSG00000179818	ASPRV1	chr2,-,70278436,70312678	chr2,-,70278436,70286774__chr2,-,70310818,70312678	non-coding	28	16.5	9	8	na	na	ENST00000415222	ENST00000432604
127644	SE	ENSG00000179818	ASPRV1	chr2,-,70278436,70312678	chr2,-,70278436,70310638__chr2,-,70310818,70312678	non-coding	28	17	9	10	na	na	ENST00000366234	ENST00000415222
127645	SE	ENSG00000179818	ASPRV1	chr2,-,70278436,70312678	chr2,-,70278436,70310669__chr2,-,70310818,70312678	non-coding	28	20.5	9	8.5	na	na	ENST00000411429	ENST00000415222
127657	SE	ENSG00000179818	ASPRV1	chr2,-,70286811,70312678	chr2,-,70286811,70308501__chr2,-,70310818,70312678	non-coding	12	16.5	0	8	na	na	ENST00000413436	ENST00000444410
127658	SE	ENSG00000179818	ASPRV1	chr2,-,70286811,70312678	chr2,-,70286811,70310638__chr2,-,70310818,70312678	non-coding	12	16.5	0	8	na	na	ENST00000413436	ENST00000432604
127659	SE	ENSG00000179818	ASPRV1	chr2,-,70286811,70312678	chr2,-,70286811,70310669__chr2,-,70310818,70312678	non-coding	12	17	0	8	na	na	ENST00000413436	ENST00000421255
109236	A3SS	ENSG00000162174	ASRGL1	chr11,+,62105045,62105361	chr11,+,62105045,62105438	non-coding	9	10	0	4	na	na	ENST00000301776	ENST00000415229
128472	SE	ENSG00000171456	ASXL1	chr20,+,31017233,31019123	chr20,+,31017233,31017703__chr20,+,31017855,31019123	coding	14	9	0	0	na	na	ENST00000412498	ENST00000421155
126484	A5SS	ENSG00000119778	ATAD2B	chr2,-,24005897,24008896	chr2,-,24005897,24008911	coding	33	10	0	0	na	na	ENST00000238789	ENST00000381024
154903	other	ENSG00000107669	ATE1	chr10,-,123629552,123658355	chr10,-,123629552,123659380	na	27	26	4	11	unknown	unknown	ENST00000224652	ENST00000369043
107514	MXE	ENSG00000107669	ATE1	chr10,-,123629552,123658355__chr10,-,123658483,123661905	chr10,-,123629552,123659380__chr10,-,123659508,123661905	coding	27.5	31	6.5	10	na	na	ENST00000224652	ENST00000369043
125271	SE	ENSG00000115966	ATF2	chr2,-,175945492,175957788	chr2,-,175945492,175957270__chr2,-,175957343,175957788	coding	288	19	32	3.5	na	na	ENST00000409437	ENST00000417080
125282	SE	ENSG00000115966	ATF2	chr2,-,175983096,175994865	chr2,-,175983096,175986171__chr2,-,175986267,175994865	coding	40	61	8	14.5	na	na	ENST00000435004	ENST00000437522
143208	A5SS	ENSG00000213676	ATF6B	chr6,-,32095526,32095893	chr6,-,32095526,32095902	coding	415	46	4	4	na	na	ENST00000375201	ENST00000375203
122563	SE	ENSG00000085978	ATG16L1	chr2,+,234181697,234183321	chr2,+,234181697,234182366__chr2,+,234182422,234183321	coding	74	69.5	4	0	Autophagy-rel_prot_16	IPR013923	ENST00000347464	ENST00000373525
122564	SE	ENSG00000085978	ATG16L1	chr2,+,234181697,234183321	chr2,+,234181697,234182366__chr2,+,234182686,234183321	splice_to_last	74	46	4	0	Autophagy-rel_prot_16	IPR013923	ENST00000419681	ENST00000444735
110228	A5SS	ENSG00000110046	ATG2A	chr11,-,64669857,64669981	chr11,-,64669857,64669987	coding	21	12	0	0	na	na	ENST00000377264	ENST00000421419
122941	SE	ENSG00000168397	ATG4B	chr2,+,242590749,242592926	chr2,+,242590749,242591298__chr2,+,242592783,242592926	coding	83	8	6	0	na	na	ENST00000415107	ENST00000419606
122942	SE	ENSG00000168397	ATG4B	chr2,+,242590749,242592926	chr2,+,242590749,242592721__chr2,+,242592783,242592926	non-coding	83	15	6	1	na	na	ENST00000396411	ENST00000402096
102911	A5SS	ENSG00000125703	ATG4C	chr1,+,63249895,63269389	chr1,+,63249943,63269389	non-coding	59	85	5	0	na	na	ENST00000317868	ENST00000371120
142321	SE	ENSG00000057663	ATG5	chr6,-,106740980,106763975	chr6,-,106740980,106756238__chr6,-,106756365,106763975	coding	25	136	3	19	na	na	ENST00000343245	ENST00000369070
134030	MXE	ENSG00000197548	ATG7	chr3,+,11406207,11421445__chr3,+,11421525,11596284	chr3,+,11406207,11468277__chr3,+,11468399,11596284	splice_to_last	15.5	52.5	10.5	0.5	na	na	ENST00000354956	ENST00000446450
126160	SE	ENSG00000198925	ATG9A	chr2,-,220092774,220094256	chr2,-,220092774,220093145__chr2,-,220093206,220094256	coding	8	23	0	1.5	na	na	ENST00000412355	ENST00000439812
126161	SE	ENSG00000198925	ATG9A	chr2,-,220092774,220094256	chr2,-,220092774,220093155__chr2,-,220093203,220094256	coding	8	17	0	0.5	na	na	ENST00000412355	ENST00000456708
126162	SE	ENSG00000198925	ATG9A	chr2,-,220092774,220094256	chr2,-,220092774,220093155__chr2,-,220093206,220094256	coding	8	37	0	0.5	na	na	ENST00000361242	ENST00000396761
126163	SE	ENSG00000198925	ATG9A	chr2,-,220092774,220094256	chr2,-,220092774,220093155__chr2,-,220093895,220094256	coding	8	20.5	0	0.5	na	na	ENST00000412355	ENST00000436856
126167	SE	ENSG00000198925	ATG9A	chr2,-,220093206,220094256	chr2,-,220093206,220093731__chr2,-,220093895,220094256	coding	46	10.5	0	0	na	na	ENST00000428226	ENST00000436856
121916	A5SS	ENSG00000138363	ATIC	chr2,+,216176883,216177220	chr2,+,216177112,216177220	non-coding	375	10	10	0	na	na	ENST00000443953	ENST00000444305
127044	A3SS	ENSG00000119787	ATL2	chr2,-,38523254,38525285	chr2,-,38523731,38525285	splice_to_last	600	10	29	3	na	na	ENST00000378954	ENST00000419554
112052	ALE	ENSG00000068650	ATP11A	chr13,+,113530254,113532530	chr13,+,113530254,113536129	coding	10	45	0	1	unknown	unknown	ENST00000283558	ENST00000375630
112053	MXE	ENSG00000068650	ATP11A	chr13,+,113530254,113532530__chr13,+,113532616,113536189	chr13,+,113530254,113534859__chr13,+,113534962,113536189	coding	13.5	8.5	0	0	na	na	ENST00000375645	ENST00000415301
153192	SE	ENSG00000101974	ATP11C	chrX,-,138811120,138820074	chrX,-,138811120,138813809__chrX,-,138813913,138820074	coding	9	440.5	0	9	na	na	ENST00000327569	ENST00000361648
104443	A5SS	ENSG00000159363	ATP13A2	chr1,-,17330905,17331186	chr1,-,17330905,17331201	coding	250	68	12	11	na	na	ENST00000326735	ENST00000452699
137036	SE	ENSG00000133657	ATP13A3	chr3,-,194126844,194134487	chr3,-,194126844,194132927__chr3,-,194133016,194134487	coding	234	304	0	13	na	na	ENST00000256031	ENST00000429136
117196	A3SS	ENSG00000074370	ATP2A3	chr17,-,3828731,3831956	chr17,-,3828734,3831956	splice_to_last	15	54	6	0	na	na	ENST00000397041	ENST00000397045
101465	SE	ENSG00000058668	ATP2B4	chr1,+,203691816,203696522	chr1,+,203691816,203693008__chr1,+,203693115,203696522	coding	10	150.5	0	4.5	ATPase_P-typ_cation-transptr_C	IPR006068	ENST00000367219	ENST00000391954
107033	SE	ENSG00000165629	ATP5C1	chr10,+,7844816,7849621	chr10,+,7844816,7848936__chr10,+,7848972,7849621	splice_to_last	45	387	42	77	na	na	ENST00000335698	ENST00000356708
116464	A5SS	ENSG00000159199	ATP5G1	chr17,+,46970201,46970770	chr17,+,46970271,46970770	non-coding	12	20	1	1	na	na	ENST00000355938	ENST00000393366
117581	SE	ENSG00000167863	ATP5H	chr17,-,73035365,73038275	chr17,-,73035365,73036186__chr17,-,73036257,73038275	coding	13	455	0	205.5	na	na	ENST00000301587	ENST00000344546
130703	AFE	ENSG00000154723	ATP5J	chr21,-,27102111,27106643	chr21,-,27102111,27107249	coding	33	35	2	2	unknown	unknown	ENST00000400089	ENST00000400094
130704	AFE	ENSG00000154723	ATP5J	chr21,-,27102111,27106643	chr21,-,27102111,27107299	coding	33	8	2	1	unknown	unknown	ENST00000400093	ENST00000400094
130706	AFE	ENSG00000154723	ATP5J	chr21,-,27102111,27106643	chr21,-,27102111,27107797	coding	33	19	2	0	unknown	unknown	ENST00000400090	ENST00000400094
130707	SE	ENSG00000154723	ATP5J	chr21,-,27102111,27107163	chr21,-,27102111,27106643__chr21,-,27106685,27107163	coding	73	35.5	9	1	na	na	ENST00000284971	ENST00000400094
130708	A5SS	ENSG00000154723	ATP5J	chr21,-,27102111,27107163	chr21,-,27102111,27107249	non-coding	73	35	9	2	na	na	ENST00000284971	ENST00000400089
130710	A5SS	ENSG00000154723	ATP5J	chr21,-,27102111,27107163	chr21,-,27102111,27107299	non-coding	73	8	9	1	na	na	ENST00000284971	ENST00000400093
130714	A5SS	ENSG00000154723	ATP5J	chr21,-,27102111,27107163	chr21,-,27102111,27107797	non-coding	73	19	9	0	na	na	ENST00000284971	ENST00000400090
130716	A5SS	ENSG00000154723	ATP5J	chr21,-,27102111,27107249	chr21,-,27102111,27107299	non-coding	35	8	2	1	na	na	ENST00000400089	ENST00000400093
130720	A5SS	ENSG00000154723	ATP5J	chr21,-,27102111,27107249	chr21,-,27102111,27107797	non-coding	35	19	2	0	na	na	ENST00000400090	ENST00000457143
130724	A5SS	ENSG00000154723	ATP5J	chr21,-,27102111,27107299	chr21,-,27102111,27107797	non-coding	8	19	1	0	na	na	ENST00000400090	ENST00000400093
148465	SE	ENSG00000106246	ATP5J2	chr7,-,99055977,99057708	chr7,-,99055977,99056769__chr7,-,99056885,99057708	coding	108	949	0	52	na	na	ENST00000359832	ENST00000394186
148468	A5SS	ENSG00000106246	ATP5J2	chr7,-,99057815,99063733	chr7,-,99057815,99063751	coding	27	252	3	2	na	na	ENST00000292475	ENST00000394186
130832	SE	ENSG00000159147	ATP5O	chr21,-,34954360,34956895	chr21,-,34954360,34954470__chr21,-,34954551,34956895	coding	11	178.5	8	15	na	na	ENST00000440810	ENST00000442660
130833	SE	ENSG00000159147	ATP5O	chr21,-,34954360,34956895	chr21,-,34954360,34954470__chr21,-,34955971,34956895	coding	11	201.5	8	40	na	na	ENST00000432378	ENST00000440810
130834	MXE	ENSG00000159147	ATP5O	chr21,-,34954551,34955793__chr21,-,34955971,34958283	chr21,-,34954551,34956895__chr21,-,34957073,34958283	coding	113.5	65.5	5.5	56.5	na	na	ENST00000442660	ENST00000457359
113079	SE	ENSG00000125375	ATP5S	chr14,+,50789436,50792326	chr14,+,50789436,50790662__chr14,+,50790833,50792326	splice_to_last	9	160	0	26	na	na	ENST00000245448	ENST00000311459
119496	SE	ENSG00000105341	ATP5SL	chr19,-,41938312,41939441	chr19,-,41938312,41939176__chr19,-,41939338,41939441	coding	20	139.5	3	0	na	na	ENST00000301183	ENST00000438807
119497	SE	ENSG00000105341	ATP5SL	chr19,-,41939577,41944122	chr19,-,41939577,41942296__chr19,-,41942376,41944122	coding	18	121	4	22	na	na	ENST00000221943	ENST00000438807
152331	MXE	ENSG00000071553	ATP6AP1	chrX,+,153660249,153660611__chrX,+,153660721,153662553	chrX,+,153660249,153662005__chrX,+,153662065,153662553	splice_to_last	95	75	0	0.5	ATPase_V1-cplx_s1su	IPR008388	ENST00000369759	ENST00000429585
149423	SE	ENSG00000047249	ATP6V1H	chr8,-,54714455,54727221	chr8,-,54714455,54723723__chr8,-,54723776,54727221	coding	12	36.5	10	12.5	na	na	ENST00000355221	ENST00000440871
149424	AFE	ENSG00000047249	ATP6V1H	chr8,-,54754284,54755430	chr8,-,54754284,54755593	coding	27	94	2	1	unknown	unknown	ENST00000359530	ENST00000396774
117937	SE	ENSG00000166377	ATP9B	chr18,+,76967011,77013380	chr18,+,76967011,76973961__chr18,+,76974037,77013380	coding	8	56.5	3	0	na	na	ENST00000359184	ENST00000397810
102226	A3SS	ENSG00000130770	ATPIF1	chr1,+,28562962,28564271	chr1,+,28562962,28564347	splice_to_last	27	4204	1	28	ATPase_inhibitor_IATP_mt	IPR007648	ENST00000335514	ENST00000373848
128650	ALE	ENSG00000088812	ATRN	chr20,+,3584908,3596474	chr20,+,3584908,3605157	coding	30	434	5	0	unknown	unknown	ENST00000262919	ENST00000446916
153977	ALE	ENSG00000085224	ATRX	chrX,-,76944416,76952064	chrX,-,76949425,76952064	coding	10	81	8	26	unknown	unknown	ENST00000343347	ENST00000373341
153978	SE	ENSG00000085224	ATRX	chrX,-,76944419,76952064	chrX,-,76944419,76949312__chrX,-,76949425,76952064	coding	8	92	0	13	na	na	ENST00000373344	ENST00000395603
111345	SE	ENSG00000204842	ATXN2	chr12,-,111890643,111893832	chr12,-,111890643,111891480__chr12,-,111891648,111893832	coding	53	128	5	14	na	na	ENST00000377611	ENST00000389154
111346	SE	ENSG00000204842	ATXN2	chr12,-,111895162,111907911	chr12,-,111895162,111902465__chr12,-,111902518,111907911	coding	163	81	20	16.5	na	na	ENST00000389154	ENST00000445688
111347	A5SS	ENSG00000204842	ATXN2	chr12,-,111908545,111923068	chr12,-,111908545,111923074	coding	93	86	18	8	na	na	ENST00000377617	ENST00000389153
114909	A3SS	ENSG00000168488	ATXN2L	chr16,+,28847442,28848048	chr16,+,28847442,28848071	splice_to_last	116	9	9	0	na	na	ENST00000340394	ENST00000382686
155564	other	ENSG00000168488	ATXN2L	chr16,+,28847442,28848048	chr16,+,28847810,28848048	na	116	28	9	0	unknown	unknown	ENST00000340394	ENST00000395547
113715	MXE	ENSG00000066427	ATXN3	chr14,-,92560174,92562436__chr14,-,92562480,92572872	chr14,-,92560174,92563017__chr14,-,92563181,92572872	coding	18	78	1	6	na	na	ENST00000340660	ENST00000393287
151610	ALE	ENSG00000148090	AUH	chr9,-,93983273,94058302	chr9,-,94057078,94058302	coding	51	13	4	0	unknown	unknown	ENST00000303617	ENST00000422391
127932	ALE	ENSG00000115307	AUP1	chr2,-,74754185,74754374	chr2,-,74754247,74754374	coding	281	45	13	10	unknown	unknown	ENST00000377526	ENST00000412627
129954	SE	ENSG00000087586	AURKA	chr20,-,54963257,54967209	chr20,-,54963257,54965611__chr20,-,54965720,54967209	coding	41	14.5	0	1	na	na	ENST00000395913	ENST00000395914
129955	A5SS	ENSG00000087586	AURKA	chr20,-,54963257,54967209	chr20,-,54963257,54967223	non-coding	41	68	0	2	na	na	ENST00000395913	ENST00000395915
129957	SE	ENSG00000087586	AURKA	chr20,-,54963257,54967223	chr20,-,54963257,54963367__chr20,-,54965720,54967223	coding	68	14	2	1.5	na	na	ENST00000395907	ENST00000451915
129959	SE	ENSG00000087586	AURKA	chr20,-,54963257,54967223	chr20,-,54963257,54963742__chr20,-,54965720,54967223	coding	68	13.5	2	1.5	na	na	ENST00000395907	ENST00000420474
129960	SE	ENSG00000087586	AURKA	chr20,-,54963257,54967223	chr20,-,54963257,54965611__chr20,-,54965720,54967223	coding	68	22.5	2	2	na	na	ENST00000312783	ENST00000395915
103607	A5SS	ENSG00000175756	AURKAIP1	chr1,-,1310169,1310376	chr1,-,1310169,1310533	non-coding	37	59	0	0	na	na	ENST00000338338	ENST00000378853
145355	A3SS	ENSG00000158321	AUTS2	chr7,+,70228326,70229737	chr7,+,70228326,70229740	splice_to_last	453	509	0	285	na	na	ENST00000406775	ENST00000416482
145357	SE	ENSG00000158321	AUTS2	chr7,+,70231319,70236534	chr7,+,70231319,70233009__chr7,+,70233053,70236534	coding	160	71.5	8	0	na	na	ENST00000406775	ENST00000443672
118593	SE	ENSG00000167601	AXL	chr19,+,41745218,41748787	chr19,+,41745218,41745598__chr19,+,41745624,41748787	coding	33	72	0	0	na	na	ENST00000301178	ENST00000359092
117681	A5SS	ENSG00000141577	AZI1	chr17,-,79171687,79171905	chr17,-,79171687,79171914	coding	25	17	3	1	na	na	ENST00000269392	ENST00000450824
137399	ALE	ENSG00000163512	AZI2	chr3,-,28368440,28373859	chr3,-,28373440,28373859	coding	53	107	0	11	unknown	unknown	ENST00000334100	ENST00000429369
137400	ALE	ENSG00000163512	AZI2	chr3,-,28368440,28373859	chr3,-,28373444,28373859	coding	53	74	0	0	unknown	unknown	ENST00000295748	ENST00000420543
137401	A3SS	ENSG00000163512	AZI2	chr3,-,28373440,28373859	chr3,-,28373444,28373859	splice_to_last	107	74	11	0	na	na	ENST00000334100	ENST00000420543
149105	SE	ENSG00000155096	AZIN1	chr8,-,103855974,103870240	chr8,-,103855974,103862226__chr8,-,103862371,103870240	coding	223	169	38	25	na	na	ENST00000337198	ENST00000347770
105048	SE	ENSG00000162885	B3GALNT2	chr1,-,235658137,235667440	chr1,-,235658137,235659495__chr1,-,235659617,235667440	coding	18	22.5	0	0	na	na	ENST00000366599	ENST00000366600
111063	A3SS	ENSG00000139044	B4GALNT3	chr12,+,661693,662356	chr12,+,661693,662359	coding	24	21	0	1	na	na	ENST00000266383	ENST00000322843
136413	SE	ENSG00000121578	B4GALT4	chr3,-,118949090,118955699	chr3,-,118949090,118953991__chr3,-,118954073,118955699	coding	374	70	25	12	na	na	ENST00000359213	ENST00000393765
130184	AFE	ENSG00000156273	BACH1	chr21,+,30671273,30693541	chr21,+,30671918,30693541	coding	32	13	0	1	unknown	unknown	ENST00000286800	ENST00000399921
130187	AFE	ENSG00000156273	BACH1	chr21,+,30671273,30693541	chr21,+,30677642,30693541	coding	32	14	0	0	unknown	unknown	ENST00000286800	ENST00000382845
130190	AFE	ENSG00000156273	BACH1	chr21,+,30671918,30693541	chr21,+,30677642,30693541	coding	13	14	1	0	unknown	unknown	ENST00000382845	ENST00000399921
113841	A3SS	ENSG00000140320	BAHD1	chr15,+,40756745,40757533	chr15,+,40756745,40757542	coding	57	97	0	16	BAH	IPR001025	ENST00000339351	ENST00000442618
105293	A3SS	ENSG00000121753	BAI2	chr1,-,32193877,32194198	chr1,-,32193880,32194198	coding	29	70	8	0	na	na	ENST00000257070	ENST00000398538
101126	A3SS	ENSG00000117523	BAT2D1	chr1,+,171481338,171482133	chr1,+,171481338,171482139	coding	407	79	7	3	BAT2_N	IPR009738	ENST00000338920	ENST00000367742
101131	SE	ENSG00000117523	BAT2D1	chr1,+,171557643,171560725	chr1,+,171557643,171558507__chr1,+,171558743,171560725	splice_to_last	119	15.5	47	1.5	na	na	ENST00000367742	ENST00000451306
150103	SE	ENSG00000130723	BAT2L	chr9,+,134349110,134353130	chr9,+,134349110,134349840__chr9,+,134351921,134353130	coding	27	118.5	2	1.5	na	na	ENST00000357304	ENST00000405995
150105	A3SS	ENSG00000130723	BAT2L	chr9,+,134357194,134357757	chr9,+,134357194,134357760	non-coding	93	56	12	32	na	na	ENST00000418650	ENST00000451855
150106	A3SS	ENSG00000130723	BAT2L	chr9,+,134363482,134366808	chr9,+,134363482,134366811	coding	8	134	0	0	na	na	ENST00000372249	ENST00000418650
150107	SE	ENSG00000130723	BAT2L	chr9,+,134367646,134371126	chr9,+,134367646,134369791__chr9,+,134369872,134371126	splice_to_last	147	423.5	17	21.5	na	na	ENST00000372249	ENST00000418650
118739	MXE	ENSG00000087088	BAX	chr19,+,49458218,49458804__chr19,+,49458855,49459454	chr19,+,49458218,49458943__chr19,+,49459089,49459454	coding	30	535	0	20.5	Bcl2_BH	IPR000712	ENST00000354470	ENST00000391871
118741	SE	ENSG00000087088	BAX	chr19,+,49458855,49459454	chr19,+,49458855,49458943__chr19,+,49459089,49459454	coding	15	595	0	22.5	Bcl2_BH	IPR000712	ENST00000354470	ENST00000356483
113531	SE	ENSG00000198604	BAZ1A	chr14,-,35255206,35261980	chr14,-,35255206,35255331__chr14,-,35255426,35261980	coding	20	47.5	1	4.5	na	na	ENST00000358716	ENST00000360310
125040	SE	ENSG00000123636	BAZ2B	chr2,-,160269055,160284821	chr2,-,160269055,160284451__chr2,-,160284552,160284821	coding	16	41	1	6	na	na	ENST00000392782	ENST00000392783
125041	SE	ENSG00000123636	BAZ2B	chr2,-,160285770,160289267	chr2,-,160285770,160287373__chr2,-,160287666,160289267	coding	17	78	1	3.5	na	na	ENST00000343439	ENST00000355831
144883	MXE	ENSG00000122507	BBS9	chr7,+,33388781,33390830__chr7,+,33390934,33397466	chr7,+,33388781,33392470__chr7,+,33392484,33397466	coding	21.5	14	5.5	5	na	na	ENST00000355070	ENST00000396127
133889	AFE	ENSG00000114439	BBX	chr3,+,107241953,107245173	chr3,+,107243040,107245173	coding	11	8	0	1	unknown	unknown	ENST00000427402	ENST00000449335
133951	SE	ENSG00000114439	BBX	chr3,+,107497365,107510086	chr3,+,107497365,107508633__chr3,+,107508722,107510086	coding	47	31.5	1	0.5	na	na	ENST00000325805	ENST00000406780
143956	ALE	ENSG00000075790	BCAP29	chr7,+,107253876,107258772	chr7,+,107253876,107262074	coding	62	25	2	1	unknown	unknown	ENST00000005259	ENST00000379119
106375	ALE	ENSG00000107949	BCCIP	chr10,+,127522514,127524672	chr10,+,127522514,127529823	coding	312	138	30	21	unknown	unknown	ENST00000299130	ENST00000392718
127442	A5SS	ENSG00000119866	BCL11A	chr2,-,60679800,60687816	chr2,-,60679800,60689416	splice_to_last	9	20	0	12	na	na	ENST00000356842	ENST00000359629
127444	SE	ENSG00000119866	BCL11A	chr2,-,60689558,60773105	chr2,-,60689558,60695866__chr2,-,60695967,60773105	coding	36	153	0	20	na	na	ENST00000358510	ENST00000378117
129337	A3SS	ENSG00000171552	BCL2L1	chr20,-,30310132,30310420	chr20,-,30310150,30310420	non-coding	48	11	36	1	na	na	ENST00000376055	ENST00000420653
129336	AFE	ENSG00000171552	BCL2L1	chr20,-,30310132,30310420	chr20,-,30310132,30311666	coding	48	21	36	1	unknown	unknown	ENST00000420653	ENST00000439267
120236	MXE	ENSG00000153094	BCL2L11	chr2,+,111881715,111907620__chr2,+,111907723,111921709	chr2,+,111881715,111911356__chr2,+,111911480,111921709	splice_to_last	62.5	10	1	0	Bcl-x_interacting	IPR015040	ENST00000308659	ENST00000436733
120247	SE	ENSG00000153094	BCL2L11	chr2,+,111907723,111921709	chr2,+,111907723,111909398__chr2,+,111911480,111921709	coding	13	10	2	0	Bcl-x_interacting	IPR015040	ENST00000361493	ENST00000439718
120248	SE	ENSG00000153094	BCL2L11	chr2,+,111907723,111921709	chr2,+,111907723,111911356__chr2,+,111911480,111921709	splice_to_last	13	13.5	2	0	Bcl-x_interacting	IPR015040	ENST00000308659	ENST00000433098
118762	A3SS	ENSG00000126453	BCL2L12	chr19,+,50170055,50170275	chr19,+,50170055,50170278	coding	239	27	7	11	na	na	ENST00000246785	ENST00000441864
118763	SE	ENSG00000126453	BCL2L12	chr19,+,50170055,50172107	chr19,+,50170055,50170275__chr19,+,50170417,50172107	coding	168	146.5	3	6	na	na	ENST00000246784	ENST00000246785
118764	SE	ENSG00000126453	BCL2L12	chr19,+,50170055,50172107	chr19,+,50170055,50170278__chr19,+,50170417,50172107	coding	168	40.5	3	8	na	na	ENST00000246784	ENST00000441864
131194	SE	ENSG00000099968	BCL2L13	chr22,+,18171907,18185008	chr22,+,18171907,18178906__chr22,+,18178975,18185008	splice_to_last	27	289	3	9	Bcl2_BH	IPR000712	ENST00000399777	ENST00000399782
136992	AFE	ENSG00000113916	BCL6	chr3,-,187452694,187453877	chr3,-,187452694,187463197	coding	13	29	1	0	unknown	unknown	ENST00000232014	ENST00000406870
147981	MXE	ENSG00000106635	BCL7B	chr7,-,72952342,72954211__chr7,-,72954381,72966496	chr7,-,72952342,72957877__chr7,-,72957973,72966496	coding	27	59	2	9	na	na	ENST00000411832	ENST00000454871
147985	SE	ENSG00000106635	BCL7B	chr7,-,72954381,72966496	chr7,-,72954381,72957877__chr7,-,72957973,72966496	coding	8	180.5	3	14	na	na	ENST00000454871	ENST00000455335
142627	SE	ENSG00000029363	BCLAF1	chr6,-,136582614,136589299	chr6,-,136582614,136588166__chr6,-,136588312,136589299	coding	31	121.5	0	78.5	na	na	ENST00000353331	ENST00000392348
142628	A3SS	ENSG00000029363	BCLAF1	chr6,-,136599907,136600900	chr6,-,136599913,136600900	coding	36	111	11	0	na	na	ENST00000353331	ENST00000429704
153659	SE	ENSG00000183337	BCOR	chrX,-,39930411,39931601	chrX,-,39930411,39930889__chrX,-,39930942,39931601	coding	13	90	2	13.5	na	na	ENST00000342274	ENST00000378455
122069	AFE	ENSG00000074582	BCS1L	chr2,+,219524465,219525661	chr2,+,219525143,219525661	coding	11	22	0	7	unknown	unknown	ENST00000359273	ENST00000431802
140154	SE	ENSG00000145734	BDP1	chr5,+,70844571,70848942	chr5,+,70844571,70845246__chr5,+,70845432,70848942	splice_to_last	12	38	3	8	na	na	ENST00000358731	ENST00000380675
117275	SE	ENSG00000126581	BECN1	chr17,-,40962945,40965965	chr17,-,40962945,40963672__chr17,-,40963814,40965965	coding	29	340	0	16	na	na	ENST00000361523	ENST00000438274
142326	AFE	ENSG00000178409	BEND3	chr6,-,107420499,107427280	chr6,-,107420499,107436293	coding	13	27	0	0	unknown	unknown	ENST00000339644	ENST00000369042
114767	SE	ENSG00000103429	BFAR	chr16,+,14738465,14743660	chr16,+,14738465,14742244__chr16,+,14742448,14743660	coding	12	308	2	200.5	na	na	ENST00000261658	ENST00000426842
100807	A3SS	ENSG00000160783	BGLAP	chr1,+,156203518,156206078	chr1,+,156203518,156206139	coding	153	17	58	2	Nnf1	IPR007128	ENST00000368273	ENST00000368276
100810	ALE	ENSG00000160783	BGLAP	chr1,+,156206273,156209338	chr1,+,156206273,156212343	coding	140	13	8	0	unknown	unknown	ENST00000368273	ENST00000368276
124639	SE	ENSG00000136717	BIN1	chr2,-,127808487,127816586	chr2,-,127808487,127808729__chr2,-,127808818,127816586	coding	14	25	0	0.5	na	na	ENST00000376113	ENST00000409400
124640	SE	ENSG00000136717	BIN1	chr2,-,127808487,127816586	chr2,-,127808487,127808729__chr2,-,127809937,127816586	coding	14	24.5	0	0.5	na	na	ENST00000376113	ENST00000393041
124641	SE	ENSG00000136717	BIN1	chr2,-,127808487,127816586	chr2,-,127808487,127808729__chr2,-,127811587,127816586	coding	14	24	0	0.5	na	na	ENST00000357970	ENST00000376113
124642	SE	ENSG00000136717	BIN1	chr2,-,127808487,127816586	chr2,-,127808487,127808729__chr2,-,127815176,127816586	coding	14	28	0	0.5	na	na	ENST00000376113	ENST00000393040
124656	SE	ENSG00000136717	BIN1	chr2,-,127821593,127826499	chr2,-,127821593,127825738__chr2,-,127825830,127826499	coding	8	22	17	7	na	na	ENST00000259238	ENST00000351659
116729	SE	ENSG00000089685	BIRC5	chr17,+,76210869,76212744	chr17,+,76210869,76212046__chr17,+,76212114,76212744	coding	359	13.5	131	0	Prot_inh_I32_IAP	IPR001370	ENST00000301633	ENST00000350051
116731	SE	ENSG00000089685	BIRC5	chr17,+,76210869,76219545	chr17,+,76210869,76212046__chr17,+,76212861,76219545	splice_to_last	24	330	1	9.5	Prot_inh_I32_IAP	IPR001370	ENST00000301633	ENST00000374948
116732	SE	ENSG00000089685	BIRC5	chr17,+,76210869,76219545	chr17,+,76210869,76212744__chr17,+,76212861,76219545	splice_to_last	24	508	1	75	Prot_inh_I32_IAP	IPR001370	ENST00000350051	ENST00000374948
116733	ALE	ENSG00000089685	BIRC5	chr17,+,76212861,76218908	chr17,+,76212861,76219545	coding	8	657	0	19	unknown	unknown	ENST00000350051	ENST00000432014
129619	SE	ENSG00000166619	BLCAP	chr20,-,36147751,36156194	chr20,-,36147751,36149720__chr20,-,36149810,36156194	non-coding	108	10.5	0	0	na	na	ENST00000373537	ENST00000445723
144977	SE	ENSG00000106605	BLVRA	chr7,+,43798332,43810736	chr7,+,43798332,43799615__chr7,+,43799708,43810736	non-coding	46	17	0	0	na	na	ENST00000265523	ENST00000402924
113572	A5SS	ENSG00000125378	BMP4	chr14,-,54420117,54423267	chr14,-,54420117,54423476	non-coding	98	44	1	0	na	na	ENST00000245451	ENST00000395600
129974	SE	ENSG00000101144	BMP7	chr20,-,55750062,55777530	chr20,-,55750062,55758777__chr20,-,55758974,55777530	coding	29	301	0	3.5	na	na	ENST00000371291	ENST00000395864
158754	other	ENSG00000173068	BNC2	chr9,-,16419646,16421259	chr9,-,16419646,16435031	na	8	16	0	0	unknown	unknown	ENST00000411752	ENST00000420953
151199	SE	ENSG00000173068	BNC2	chr9,-,16419646,16435552	chr9,-,16419646,16421259__chr9,-,16435096,16435552	coding	53	14	0	2	na	na	ENST00000411752	ENST00000436939
151200	SE	ENSG00000173068	BNC2	chr9,-,16419646,16435552	chr9,-,16419646,16435031__chr9,-,16435096,16435552	coding	53	18	0	2	na	na	ENST00000420953	ENST00000436939
114490	SE	ENSG00000140299	BNIP2	chr15,-,59956318,59961090	chr15,-,59956318,59960301__chr15,-,59960336,59961090	coding	308	8	113	0	na	na	ENST00000409352	ENST00000439052
140654	SE	ENSG00000145919	BOD1	chr5,-,173035294,173040133	chr5,-,173035294,173036240__chr5,-,173036436,173040133	coding	36	624	1	169	na	na	ENST00000285908	ENST00000311086
127851	SE	ENSG00000163170	BOLA3	chr2,-,74362784,74372315	chr2,-,74362784,74369398__chr2,-,74369486,74372315	coding	109	69	16	23	na	na	ENST00000295326	ENST00000327428
116581	SE	ENSG00000171634	BPTF	chr17,+,65871135,65887959	chr17,+,65871135,65871671__chr17,+,65871859,65887959	coding	13	99.5	19	17	na	na	ENST00000306378	ENST00000424123
116582	SE	ENSG00000171634	BPTF	chr17,+,65871135,65887959	chr17,+,65871135,65871671__chr17,+,65882431,65887959	coding	13	89.5	19	19	na	na	ENST00000306378	ENST00000335221
116583	SE	ENSG00000171634	BPTF	chr17,+,65871859,65887959	chr17,+,65871859,65882243__chr17,+,65882431,65887959	coding	90	92	4	12	na	na	ENST00000335221	ENST00000424123
116584	A5SS	ENSG00000171634	BPTF	chr17,+,65942011,65943841	chr17,+,65942440,65943841	coding	603	172	50	30	na	na	ENST00000306378	ENST00000321866
116585	SE	ENSG00000171634	BPTF	chr17,+,65955990,65960327	chr17,+,65955990,65959448__chr17,+,65959621,65960327	coding	111	158	32	27	Znf_PHD	IPR001965	ENST00000342579	ENST00000424123
117320	SE	ENSG00000012048	BRCA1	chr17,-,41246876,41251791	chr17,-,41246876,41247862__chr17,-,41249305,41251791	coding	9	23	0	2.5	na	na	ENST00000353540	ENST00000357654
117323	AFE	ENSG00000012048	BRCA1	chr17,-,41276131,41276753	chr17,-,41276131,41277287	coding	9	17	0	0	unknown	unknown	ENST00000357654	ENST00000393691
117324	AFE	ENSG00000012048	BRCA1	chr17,-,41276131,41276753	chr17,-,41276131,41277293	coding	9	13	0	0	unknown	unknown	ENST00000393691	ENST00000412061
117325	A5SS	ENSG00000012048	BRCA1	chr17,-,41276131,41277287	chr17,-,41276131,41277293	non-coding	17	13	0	0	na	na	ENST00000357654	ENST00000412061
133770	SE	ENSG00000100425	BRD1	chr22,-,50181141,50187681	chr22,-,50181141,50181224__chr22,-,50181534,50187681	coding	14	20.5	0	0.5	na	na	ENST00000216267	ENST00000457780
119227	ALE	ENSG00000141867	BRD4	chr19,-,15355572,15364962	chr19,-,15360100,15364962	coding	272	131	81	15	unknown	unknown	ENST00000263377	ENST00000371835
140466	SE	ENSG00000112983	BRD8	chr5,-,137492955,137495757	chr5,-,137492955,137495243__chr5,-,137495287,137495757	coding	98	112	21	10.5	na	na	ENST00000402931	ENST00000411594
140468	SE	ENSG00000112983	BRD8	chr5,-,137501796,137503622	chr5,-,137501796,137502206__chr5,-,137502298,137503622	coding	89	153	11	43	na	na	ENST00000411594	ENST00000454473
140469	SE	ENSG00000112983	BRD8	chr5,-,137501796,137503622	chr5,-,137501796,137502206__chr5,-,137502415,137503622	coding	89	225.5	11	48.5	na	na	ENST00000402931	ENST00000411594
140470	SE	ENSG00000112983	BRD8	chr5,-,137503766,137504910	chr5,-,137503766,137504158__chr5,-,137504376,137504910	coding	26	48	1	5.5	na	na	ENST00000402931	ENST00000411594
140865	A3SS	ENSG00000028310	BRD9	chr5,-,889761,891269	chr5,-,889880,891269	non-coding	45	10	4	3	na	na	ENST00000323510	ENST00000433367
123188	SE	ENSG00000158019	BRE	chr2,+,27995558,28002299	chr2,+,27995558,27997290__chr2,+,27997396,28002299	splice_to_last	67	141	0	30	na	na	ENST00000296102	ENST00000379666
123196	MXE	ENSG00000158019	BRE	chr2,+,28521357,28532948__chr2,+,28533019,28561316	chr2,+,28521357,28550140__chr2,+,28550313,28561316	coding	27.5	8	11.5	0	na	na	ENST00000344773	ENST00000361704
123197	SE	ENSG00000158019	BRE	chr2,+,28521357,28561316	chr2,+,28521357,28532948__chr2,+,28533019,28561316	splice_to_last	188	27.5	67	11.5	na	na	ENST00000342045	ENST00000361704
123198	SE	ENSG00000158019	BRE	chr2,+,28521357,28561316	chr2,+,28521357,28550140__chr2,+,28550313,28561316	splice_to_last	188	8	67	0	na	na	ENST00000342045	ENST00000344773
110257	A3SS	ENSG00000174744	BRMS1	chr11,-,66105277,66105713	chr11,-,66105359,66105713	splice_to_last	9	45	1	10	na	na	ENST00000359957	ENST00000425825
136068	A3SS	ENSG00000156983	BRPF1	chr3,+,9784936,9785261	chr3,+,9784936,9785264	coding	56	46	0	3	na	na	ENST00000302054	ENST00000424362
136069	SE	ENSG00000156983	BRPF1	chr3,+,9785584,9786691	chr3,+,9785584,9785907__chr3,+,9786191,9786691	coding	23	52.5	0	3	AT_hook_DNA-bd_CS	IPR017956	ENST00000424362	ENST00000433861
108738	SE	ENSG00000174672	BRSK2	chr11,+,1477916,1480421	chr11,+,1477916,1478184__chr11,+,1478278,1480421	coding	46	30.5	2	1.5	na	na	ENST00000308219	ENST00000308230
110111	SE	ENSG00000168000	BSCL2	chr11,-,62458612,62459847	chr11,-,62458612,62458751__chr11,-,62458892,62459847	coding	10	187	0	58.5	na	na	ENST00000278893	ENST00000301781
110121	A5SS	ENSG00000168000	BSCL2	chr11,-,62473088,62473674	chr11,-,62473088,62473730	non-coding	71	13	0	0	na	na	ENST00000403734	ENST00000421906
110124	AFE	ENSG00000168000	BSCL2	chr11,-,62473088,62473674	chr11,-,62473088,62474580	coding	71	41	0	13	unknown	unknown	ENST00000403734	ENST00000405837
110126	AFE	ENSG00000168000	BSCL2	chr11,-,62473088,62473730	chr11,-,62473088,62474580	coding	13	41	0	13	unknown	unknown	ENST00000360796	ENST00000421906
105333	SE	ENSG00000160058	BSDC1	chr1,-,32834150,32841862	chr1,-,32834150,32834830__chr1,-,32834938,32841862	coding	67	8	16	0.5	na	na	ENST00000444377	ENST00000455895
119011	SE	ENSG00000172270	BSG	chr19,+,572700,579499	chr19,+,572700,577773__chr19,+,578120,579499	coding	755	9.5	13	0	Ig_sub	IPR003599	ENST00000333511	ENST00000353555
128250	SE	ENSG00000132640	BTBD3	chr20,+,11871601,11898981	chr20,+,11871601,11898425__chr20,+,11898658,11898981	non-coding	34	32	0	1	na	na	ENST00000254977	ENST00000399006
113727	ALE	ENSG00000011114	BTBD7	chr14,-,93730338,93760203	chr14,-,93755052,93760203	coding	20	13	13	5	unknown	unknown	ENST00000298896	ENST00000436095
134343	A5SS	ENSG00000169814	BTD	chr3,+,15643276,15676930	chr3,+,15643400,15676930	coding	23	84	0	3	na	na	ENST00000303498	ENST00000449107
140164	A5SS	ENSG00000145741	BTF3	chr5,+,72794382,72794958	chr5,+,72794623,72794958	non-coding	322	134	221	45	na	na	ENST00000335895	ENST00000380591
141423	MXE	ENSG00000124508	BTN2A2	chr6,+,26384142,26385242__chr6,+,26385589,26390232	chr6,+,26384142,26388240__chr6,+,26388521,26390232	splice_to_last	43	64	0	1	Ig_sub	IPR003599	ENST00000419337	ENST00000432533
106055	SE	ENSG00000166167	BTRC	chr10,+,103113984,103221737	chr10,+,103113984,103190101__chr10,+,103190208,103221737	coding	19	12	0	0.5	na	na	ENST00000370187	ENST00000408038
113832	A3SS	ENSG00000156970	BUB1B	chr15,+,40493180,40494590	chr15,+,40493180,40494605	coding	29	788	46	33	na	na	ENST00000287598	ENST00000442874
106362	A3SS	ENSG00000154473	BUB3	chr10,+,124922343,124923335	chr10,+,124922343,124924562	splice_to_last	407	122	59	18	na	na	ENST00000368858	ENST00000368865
146043	A5SS	ENSG00000106245	BUD31	chr7,+,99006626,99007656	chr7,+,99006867,99007656	non-coding	160	100	50	10	na	na	ENST00000222969	ENST00000403633
121503	A5SS	ENSG00000082153	BZW1	chr2,+,201676449,201677930	chr2,+,201676712,201677930	non-coding	54	133	7	7	na	na	ENST00000409600	ENST00000410110
144539	A5SS	ENSG00000136261	BZW2	chr7,+,16685912,16705061	chr7,+,16685928,16705061	non-coding	213	19	3	0	na	na	ENST00000432311	ENST00000436868
144556	SE	ENSG00000136261	BZW2	chr7,+,16722469,16729421	chr7,+,16722469,16725529__chr7,+,16725664,16729421	splice_to_last	12	790.5	1	7.5	na	na	ENST00000432311	ENST00000433922
144557	SE	ENSG00000136261	BZW2	chr7,+,16722469,16729421	chr7,+,16722469,16725548__chr7,+,16725664,16729421	splice_to_last	12	609.5	1	8.5	na	na	ENST00000432311	ENST00000436868
107483	A5SS	ENSG00000197771	C10orf119	chr10,-,121602106,121602759	chr10,-,121602106,121602765	coding	74	155	19	99	na	na	ENST00000360003	ENST00000369077
106372	SE	ENSG00000107938	C10orf137	chr10,+,127414406,127417926	chr10,+,127414406,127417571__chr10,+,127417672,127417926	coding	16	45.5	2	1	na	na	ENST00000337623	ENST00000356792
107094	A3SS	ENSG00000122378	C10orf58	chr10,+,82168398,82180221	chr10,+,82168398,82180238	non-coding	84	20	0	1	na	na	ENST00000372185	ENST00000372187
109511	SE	ENSG00000166452	C11orf17	chr11,+,8933217,8936372	chr11,+,8933217,8933999__chr11,+,8934079,8936372	coding	16	23	0	3	na	na	ENST00000299576	ENST00000309357
109444	A3SS	ENSG00000158636	C11orf30	chr11,+,76169401,76170976	chr11,+,76169401,76170979	coding	120	26	2	21	na	na	ENST00000334736	ENST00000393457
108578	A3SS	ENSG00000150776	C11orf57	chr11,+,111952758,111953188	chr11,+,111952758,111953191	splice_to_last	93	16	0	2	na	na	ENST00000280352	ENST00000393047
108995	SE	ENSG00000166352	C11orf74	chr11,+,36631788,36669565	chr11,+,36631788,36654833__chr11,+,36654987,36669565	splice_to_last	9	10.5	3	2	na	na	ENST00000347206	ENST00000446510
108996	SE	ENSG00000166352	C11orf74	chr11,+,36631788,36669565	chr11,+,36631788,36654833__chr11,+,36657666,36669565	coding	9	28.5	3	4.5	na	na	ENST00000334307	ENST00000347206
109359	SE	ENSG00000173715	C11orf80	chr11,+,66589234,66595736	chr11,+,66589234,66590034__chr11,+,66590144,66595736	coding	22	511.5	2	30.5	na	na	ENST00000346672	ENST00000360962
111568	SE	ENSG00000064102	C12orf11	chr12,-,27067060,27068934	chr12,-,27067060,27067340__chr12,-,27067510,27068934	coding	23	458.5	6	59.5	na	na	ENST00000261190	ENST00000335745
111206	SE	ENSG00000133641	C12orf29	chr12,+,88429514,88436601	chr12,+,88429514,88433924__chr12,+,88434041,88436601	coding	26	39	2	11	na	na	ENST00000332476	ENST00000356891
111680	A5SS	ENSG00000139620	C12orf41	chr12,-,49048842,49054148	chr12,-,49048842,49054250	coding	127	36	76	3	na	na	ENST00000324947	ENST00000420613
111681	ALE	ENSG00000139620	C12orf41	chr12,-,49054401,49061475	chr12,-,49056436,49061475	coding	205	56	32	4	unknown	unknown	ENST00000324947	ENST00000357861
110508	SE	ENSG00000185480	C12orf48	chr12,+,102559660,102576326	chr12,+,102559660,102569260__chr12,+,102572547,102576326	coding	22	136.5	10	5	na	na	ENST00000358383	ENST00000392911
110509	ALE	ENSG00000185480	C12orf48	chr12,+,102559660,102576326	chr12,+,102559660,102589728	coding	22	9	10	0	unknown	unknown	ENST00000358383	ENST00000378128
110510	SE	ENSG00000185480	C12orf48	chr12,+,102559660,102589728	chr12,+,102559660,102569260__chr12,+,102589224,102589728	splice_to_last	9	91.5	0	6.5	na	na	ENST00000327680	ENST00000378128
110682	A5SS	ENSG00000130921	C12orf65	chr12,+,123738502,123741359	chr12,+,123739579,123741359	non-coding	51	17	21	3	Pep_rel_factor_I	IPR000352	ENST00000366329	ENST00000425637
112362	SE	ENSG00000151287	C13orf27	chr13,-,103421890,103426031	chr13,-,103421890,103422361__chr13,-,103422435,103426031	coding	9	15.5	0	0.5	na	na	ENST00000376021	ENST00000376032
112407	SE	ENSG00000165480	C13orf3	chr13,-,21729288,21732060	chr13,-,21729288,21729831__chr13,-,21729949,21732060	coding	39	414	3	55.5	na	na	ENST00000314759	ENST00000400018
113134	AFE	ENSG00000050130	C14orf100	chr14,+,59951310,59953430	chr14,+,59951833,59953430	coding	43	11	2	0	unknown	unknown	ENST00000261247	ENST00000356057
113551	SE	ENSG00000165506	C14orf104	chr14,-,50092765,50100004	chr14,-,50092765,50094729__chr14,-,50094872,50100004	coding	150	253.5	33	14	na	na	ENST00000298292	ENST00000406043
113548	SE	ENSG00000129534	C14orf106	chr14,-,45716579,45722237	chr14,-,45716579,45719233__chr14,-,45719340,45722237	coding	160	27.5	21	16.5	na	na	ENST00000451174	ENST00000454990
113311	A5SS	ENSG00000153485	C14orf109	chr14,+,93651376,93652604	chr14,+,93651829,93652604	non-coding	10	40	0	16	na	na	ENST00000283534	ENST00000415050
113668	MXE	ENSG00000151445	C14orf133	chr14,-,77915699,77916056__chr14,-,77916094,77919641	chr14,-,77915699,77917529__chr14,-,77917675,77919641	coding	51	25	1.5	2.5	na	na	ENST00000327028	ENST00000448935
113138	SE	ENSG00000126773	C14orf135	chr14,+,60559136,60581417	chr14,+,60559136,60574303__chr14,+,60575044,60581417	coding	10	32	0	2	na	na	ENST00000317623	ENST00000406854
113302	AFE	ENSG00000133943	C14orf159	chr14,+,91580871,91623982	chr14,+,91614201,91623982	coding	25	8	0	2	unknown	unknown	ENST00000412671	ENST00000428926
113304	A5SS	ENSG00000133943	C14orf159	chr14,+,91639746,91642277	chr14,+,91639782,91642277	coding	8	16	1	0	DUF1445	IPR009906	ENST00000420339	ENST00000457117
113368	SE	ENSG00000156411	C14orf2	chr14,-,104381525,104387806	chr14,-,104381525,104387276__chr14,-,104387544,104387806	coding	1101	21	66	4	na	na	ENST00000286953	ENST00000414262
114614	ALE	ENSG00000178761	C15orf17	chr15,-,75197052,75197494	chr15,-,75197399,75197494	coding	507	64	27	9	unknown	unknown	ENST00000357635	ENST00000457294
114112	A5SS	ENSG00000167173	C15orf39	chr15,+,75501164,75503089	chr15,+,75501216,75503089	splice_to_last	8	82	1	0	na	na	ENST00000360639	ENST00000446981
114544	A5SS	ENSG00000138614	C15orf44	chr15,-,65897573,65899496	chr15,-,65897573,65899639	non-coding	70	10	1	1	na	na	ENST00000313182	ENST00000431261
115848	SE	ENSG00000130731	C16orf13	chr16,-,685339,686093	chr16,-,685339,685611__chr16,-,685773,686093	coding	8	41.5	0	1.5	na	na	ENST00000301686	ENST00000397664
115540	MXE	ENSG00000103148	C16orf35	chr16,-,162773,167299__chr16,-,167373,180520	chr16,-,162773,169124__chr16,-,169253,180520	coding	21.5	100.5	1	3.5	na	na	ENST00000262313	ENST00000445810
115541	SE	ENSG00000103148	C16orf35	chr16,-,162773,169124	chr16,-,162773,167299__chr16,-,167373,169124	coding	65	77.5	3	10.5	na	na	ENST00000399953	ENST00000399955
115556	SE	ENSG00000103148	C16orf35	chr16,-,169253,180520	chr16,-,169253,174935__chr16,-,175071,180520	coding	136	10	4	0	na	na	ENST00000456528	ENST00000457916
115391	SE	ENSG00000067365	C16orf68	chr16,+,8722966,8729024	chr16,+,8722966,8728895__chr16,+,8728935,8729024	splice_to_last	26	73	25	6	na	na	ENST00000163678	ENST00000381920
115751	SE	ENSG00000155330	C16orf87	chr16,-,46836981,46858297	chr16,-,46836981,46843514__chr16,-,46843696,46858297	coding	62	229	1	11	na	na	ENST00000285697	ENST00000394806
117702	SE	ENSG00000181396	C17orf101	chr17,-,80350409,80356071	chr17,-,80350409,80352206__chr17,-,80352418,80356071	coding	29	8.5	2	0.5	na	na	ENST00000313056	ENST00000329197
116000	SE	ENSG00000175061	C17orf45	chr17,+,16342727,16343498	chr17,+,16342727,16342973__chr17,+,16343016,16343498	coding	4261	660	80	87	na	na	ENST00000347812	ENST00000454098
116001	SE	ENSG00000175061	C17orf45	chr17,+,16343566,16344681	chr17,+,16343566,16344387__chr17,+,16344443,16344681	splice_to_last	151	3611.5	13	260	na	na	ENST00000347812	ENST00000454098
116613	A3SS	ENSG00000161939	C17orf49	chr17,+,6920332,6920575	chr17,+,6920332,6920579	splice_to_last	160	372	7	248	na	na	ENST00000293804	ENST00000439424
116401	SE	ENSG00000125319	C17orf53	chr17,+,42232778,42239238	chr17,+,42232778,42235200__chr17,+,42235308,42239238	splice_to_last	40	117.5	0	5	na	na	ENST00000245382	ENST00000319977
117526	A5SS	ENSG00000186665	C17orf58	chr17,-,65988218,65989016	chr17,-,65988218,65989159	non-coding	9	15	0	11	na	na	ENST00000334461	ENST00000449250
117704	SE	ENSG00000178927	C17orf62	chr17,-,80407167,80408575	chr17,-,80407167,80407306__chr17,-,80407355,80408575	coding	39	17.5	0	0	na	na	ENST00000306645	ENST00000437807
117683	A5SS	ENSG00000185504	C17orf70	chr17,-,79518228,79518757	chr17,-,79518228,79518953	non-coding	48	33	2	0	na	na	ENST00000327787	ENST00000443656
116618	SE	ENSG00000141219	C17orf80	chr17,+,71233133,71239034	chr17,+,71233133,71238382__chr17,+,71238489,71239034	coding	9	46.5	7	5.5	na	na	ENST00000268942	ENST00000426147
117125	SE	ENSG00000074356	C17orf85	chr17,-,3725345,3728235	chr17,-,3725345,3727353__chr17,-,3727385,3728235	coding	62	16.5	7	2	na	na	ENST00000158149	ENST00000389005
116677	SE	ENSG00000181038	C17orf95	chr17,+,74723259,74729059	chr17,+,74723259,74725771__chr17,+,74725875,74729059	coding	19	68.5	2	5	na	na	ENST00000317409	ENST00000341249
118041	SE	ENSG00000134779	C18orf10	chr18,-,34380273,34387809	chr18,-,34380273,34385336__chr18,-,34385464,34387809	coding	12	607	0	216.5	na	na	ENST00000383056	ENST00000415958
117946	SE	ENSG00000101546	C18orf22	chr18,+,77798616,77804211	chr18,+,77798616,77802134__chr18,+,77802218,77804211	coding	25	209	1	39.5	na	na	ENST00000262197	ENST00000306735
117855	A5SS	ENSG00000154839	C18orf24	chr18,+,47901563,47902189	chr18,+,47901608,47902189	non-coding	9	40	3	0	na	na	ENST00000285116	ENST00000398452
117989	SE	ENSG00000134490	C18orf45	chr18,-,20950224,20953675	chr18,-,20950224,20951385__chr18,-,20951433,20953675	coding	36	21.5	0	0	na	na	ENST00000256907	ENST00000383233
117990	ALE	ENSG00000134490	C18orf45	chr18,-,20953726,20957609	chr18,-,20956904,20957609	coding	43	13	2	0	unknown	unknown	ENST00000256907	ENST00000399707
118400	SE	ENSG00000105176	C19orf2	chr19,+,30433570,30476129	chr19,+,30433570,30462099__chr19,+,30462133,30476129	coding	65	127.5	0	4	PFD_alpha-like	IPR004127	ENST00000312051	ENST00000360605
118401	A3SS	ENSG00000105176	C19orf2	chr19,+,30503437,30505793	chr19,+,30503437,30506442	splice_to_last	62	208	18	41	na	na	ENST00000312051	ENST00000360605
155927	other	ENSG00000188493	C19orf54	chr19,-,41249885,41250463	chr19,-,41250100,41250463	na	902	25	0	4	unknown	unknown	ENST00000339153	ENST00000392019
118477	A3SS	ENSG00000167595	C19orf55	chr19,+,36253046,36253153	chr19,+,36253046,36253156	coding	84	131	0	2	na	na	ENST00000301165	ENST00000396911
118794	SE	ENSG00000161671	C19orf63	chr19,+,50984233,50985405	chr19,+,50984233,50985117__chr19,+,50985203,50985405	splice_to_last	518	44.5	23	0	na	na	ENST00000334976	ENST00000376918
127553	AFE	ENSG00000197223	C1D	chr2,-,68274450,68280192	chr2,-,68274450,68290089	coding	31	40	0	0	unknown	unknown	ENST00000355848	ENST00000407324
127554	SE	ENSG00000197223	C1D	chr2,-,68274450,68290076	chr2,-,68274450,68280192__chr2,-,68280417,68290076	coding	27	15.5	0	0	na	na	ENST00000407324	ENST00000410067
127555	A5SS	ENSG00000197223	C1D	chr2,-,68274450,68290076	chr2,-,68274450,68290089	non-coding	27	40	0	0	na	na	ENST00000355848	ENST00000410067
156665	other	ENSG00000197223	C1D	chr2,-,68274450,68290089	chr2,-,68280268,68290089	na	40	12	0	0	unknown	unknown	ENST00000355848	ENST00000409302
103407	SE	ENSG00000121931	C1orf103	chr1,-,111492744,111506242	chr1,-,111492744,111493909__chr1,-,111495436,111506242	coding	17	143	15	22	na	na	ENST00000324843	ENST00000443367
102396	SE	ENSG00000214193	C1orf113	chr1,+,36773425,36773989	chr1,+,36773425,36773518__chr1,+,36773809,36773989	coding	8	66	0	2	SH3_domain	IPR001452	ENST00000312808	ENST00000373139
101074	SE	ENSG00000055070	C1orf144	chr1,+,16693802,16719722	chr1,+,16693802,16717869__chr1,+,16717918,16719722	coding	84	36	0	0.5	na	na	ENST00000401088	ENST00000401089
105416	ALE	ENSG00000163875	C1orf149	chr1,-,37959414,37967404	chr1,-,37961518,37967404	coding	58	180	0	7	unknown	unknown	ENST00000296214	ENST00000373073
100819	A3SS	ENSG00000163467	C1orf182	chr1,+,156308395,156309424	chr1,+,156308395,156309525	non-coding	22	10	0	0	na	na	ENST00000368253	ENST00000368254
101938	A3SS	ENSG00000168275	C1orf31	chr1,+,234509423,234509972	chr1,+,234509423,234509975	coding	35	409	1	5	na	na	ENST00000366615	ENST00000424237
104050	SE	ENSG00000143612	C1orf43	chr1,-,154185099,154186932	chr1,-,154185099,154186368__chr1,-,154186421,154186932	coding	74	438	10	28.5	na	na	ENST00000362076	ENST00000368518
104051	SE	ENSG00000143612	C1orf43	chr1,-,154187049,154192817	chr1,-,154187049,154192311__chr1,-,154192412,154192817	coding	44	92	5	14	na	na	ENST00000362076	ENST00000368518
100539	A3SS	ENSG00000159208	C1orf51	chr1,+,150255027,150255617	chr1,+,150255027,150255871	non-coding	18	58	0	1	na	na	ENST00000369094	ENST00000369095
100540	A3SS	ENSG00000159208	C1orf51	chr1,+,150255027,150255617	chr1,+,150255027,150255923	non-coding	18	16	0	0	na	na	ENST00000369095	ENST00000447007
100541	A3SS	ENSG00000159208	C1orf51	chr1,+,150255027,150255871	chr1,+,150255027,150255923	non-coding	58	16	1	0	na	na	ENST00000369094	ENST00000447007
105884	SE	ENSG00000162642	C1orf52	chr1,-,85724404,85725040	chr1,-,85724404,85724617__chr1,-,85724743,85725040	coding	43	61.5	14	6.5	na	na	ENST00000344356	ENST00000431175
100538	SE	ENSG00000118292	C1orf54	chr1,+,150249039,150253245	chr1,+,150249039,150252053__chr1,+,150252151,150253245	splice_to_last	47	36	1	8.5	na	na	ENST00000369098	ENST00000369099
102060	SE	ENSG00000162852	C1orf71	chr1,+,246755242,246795195	chr1,+,246755242,246784730__chr1,+,246784935,246795195	coding	8	18.5	0	0.5	na	na	ENST00000366511	ENST00000366512
100664	A3SS	ENSG00000160679	C1orf77	chr1,+,153610923,153614718	chr1,+,153610923,153614721	splice_to_last	172	199	0	123	na	na	ENST00000368686	ENST00000368690
104154	SE	ENSG00000198715	C1orf85	chr1,-,156264355,156265316	chr1,-,156264355,156264549__chr1,-,156264806,156265316	coding	69	111	1	7.5	na	na	ENST00000362007	ENST00000368264
104794	SE	ENSG00000162585	C1orf86	chr1,-,2116951,2125077	chr1,-,2116951,2117442__chr1,-,2121219,2125077	coding	11	112	0	0.5	na	na	ENST00000400918	ENST00000400919
104795	SE	ENSG00000162585	C1orf86	chr1,-,2116951,2125077	chr1,-,2116951,2117442__chr1,-,2124413,2125077	coding	11	30	0	0	na	na	ENST00000400918	ENST00000428120
104800	SE	ENSG00000162585	C1orf86	chr1,-,2121219,2125077	chr1,-,2121219,2124283__chr1,-,2124413,2125077	coding	214	25	1	0	na	na	ENST00000359030	ENST00000428120
101149	SE	ENSG00000094975	C1orf9	chr1,+,172520765,172525008	chr1,+,172520765,172522399__chr1,+,172522509,172525008	coding	15	62	0	6.5	na	na	ENST00000263688	ENST00000392073
101150	SE	ENSG00000094975	C1orf9	chr1,+,172544762,172546903	chr1,+,172544762,172546678__chr1,+,172546698,172546903	coding	16	23	7	0	Sad1_UNC_C	IPR012919	ENST00000263688	ENST00000392073
102107	A3SS	ENSG00000157870	C1orf93	chr1,+,2519230,2519774	chr1,+,2519230,2519828	coding	12	183	16	8	na	na	ENST00000378424	ENST00000378425
102108	A3SS	ENSG00000157870	C1orf93	chr1,+,2520063,2520360	chr1,+,2520063,2520392	coding	53	30	3	0	na	na	ENST00000378424	ENST00000378425
101664	ALE	ENSG00000153363	C1orf97	chr1,+,211570172,211571377	chr1,+,211570172,211599552	coding	8	26	0	0	unknown	unknown	ENST00000367003	ENST00000423222
140732	SE	ENSG00000082196	C1QTNF3	chr5,-,33998931,34005860	chr5,-,33998931,34004678__chr5,-,34004838,34005860	coding	8	23.5	7	0	na	na	ENST00000382079	ENST00000426255
129041	ALE	ENSG00000171984	C20orf196	chr20,+,5753688,5753777	chr20,+,5753688,5843669	coding	37	28	0	0	unknown	unknown	ENST00000378979	ENST00000445603
128908	A5SS	ENSG00000177410	C20orf199	chr20,+,47895252,47895640	chr20,+,47895274,47895640	non-coding	358	11	88	0	na	na	ENST00000326677	ENST00000371743
128910	SE	ENSG00000177410	C20orf199	chr20,+,47895744,47905581	chr20,+,47895744,47897021__chr20,+,47897106,47905581	non-coding	216	445	130	115	na	na	ENST00000326677	ENST00000417721
128911	SE	ENSG00000177410	C20orf199	chr20,+,47895744,47905581	chr20,+,47895744,47897021__chr20,+,47897500,47905581	non-coding	216	640.5	130	388	na	na	ENST00000371743	ENST00000417721
128912	SE	ENSG00000177410	C20orf199	chr20,+,47895744,47905581	chr20,+,47895744,47897021__chr20,+,47898354,47905581	non-coding	216	264.5	130	71	na	na	ENST00000417721	ENST00000450535
128913	SE	ENSG00000177410	C20orf199	chr20,+,47897106,47905581	chr20,+,47897106,47897439__chr20,+,47897500,47905581	non-coding	389	572.5	96	357.5	na	na	ENST00000326677	ENST00000371743
128914	SE	ENSG00000177410	C20orf199	chr20,+,47897106,47905581	chr20,+,47897106,47897439__chr20,+,47898354,47905581	non-coding	389	196.5	96	40.5	na	na	ENST00000326677	ENST00000450535
128915	SE	ENSG00000177410	C20orf199	chr20,+,47897500,47905581	chr20,+,47897500,47898288__chr20,+,47898354,47905581	non-coding	780	28	642	9.5	na	na	ENST00000371743	ENST00000450535
128633	SE	ENSG00000101084	C20orf24	chr20,+,35236220,35238003	chr20,+,35236220,35236292__chr20,+,35236402,35238003	coding	1133	29	169	7.5	Rab5ip	IPR010742	ENST00000344795	ENST00000397252
128634	SE	ENSG00000101084	C20orf24	chr20,+,35236220,35240412	chr20,+,35236220,35236292__chr20,+,35238132,35240412	splice_to_last	452	149	0	718	Rab5ip	IPR010742	ENST00000342422	ENST00000397252
128635	SE	ENSG00000101084	C20orf24	chr20,+,35236220,35240412	chr20,+,35236220,35238003__chr20,+,35238132,35240412	splice_to_last	452	702	0	802	Rab5ip	IPR010742	ENST00000342422	ENST00000344795
128636	SE	ENSG00000101084	C20orf24	chr20,+,35236220,35240412	chr20,+,35236220,35238003__chr20,+,35238160,35240412	splice_to_last	452	566.5	0	84.5	Rab5ip	IPR010742	ENST00000342422	ENST00000373852
129298	SE	ENSG00000101474	C20orf3	chr20,-,24944657,24950161	chr20,-,24944657,24945010__chr20,-,24949719,24950161	coding	17	307	0	1	na	na	ENST00000447138	ENST00000451442
129299	SE	ENSG00000101474	C20orf3	chr20,-,24944657,24950161	chr20,-,24944657,24949527__chr20,-,24949719,24950161	coding	17	422.5	0	13	na	na	ENST00000217456	ENST00000447138
129887	AFE	ENSG00000089063	C20orf30	chr20,-,5090090,5092145	chr20,-,5090090,5093375	coding	21	33	0	14	unknown	unknown	ENST00000379286	ENST00000379299
128958	SE	ENSG00000022277	C20orf43	chr20,+,55043821,55048356	chr20,+,55043821,55047381__chr20,+,55047470,55048356	coding	103	11.5	19	0	DUF602	IPR006735	ENST00000023939	ENST00000449062
128270	A3SS	ENSG00000101247	C20orf7	chr20,+,13769297,13773805	chr20,+,13769297,13773825	coding	10	28	6	5	na	na	ENST00000378081	ENST00000378106
128271	SE	ENSG00000101247	C20orf7	chr20,+,13773872,13779106	chr20,+,13773872,13775483__chr20,+,13775586,13779106	coding	84	85.5	0	2	Methyltransf_11	IPR013216	ENST00000378081	ENST00000378106
128287	SE	ENSG00000125871	C20orf72	chr20,+,17951012,17970581	chr20,+,17951012,17956326__chr20,+,17968940,17970581	splice_to_last	21	165.5	1	31.5	na	na	ENST00000377704	ENST00000377710
129326	SE	ENSG00000196476	C20orf96	chr20,-,264721,270899	chr20,-,264721,270199__chr20,-,270316,270899	coding	34	98.5	14	16.5	na	na	ENST00000382369	ENST00000400269
131090	A5SS	ENSG00000160226	C21orf2	chr21,-,45750208,45750345	chr21,-,45750208,45750705	splice_to_last	10	27	1	0	na	na	ENST00000380160	ENST00000397956
130592	A5SS	ENSG00000182362	C21orf57	chr21,+,47706328,47706783	chr21,+,47706650,47706783	non-coding	67	32	8	9	na	na	ENST00000329319	ENST00000397701
130594	AFE	ENSG00000182362	C21orf57	chr21,+,47706328,47706783	chr21,+,47706656,47706783	coding	67	10	8	0	unknown	unknown	ENST00000397691	ENST00000397701
130595	A5SS	ENSG00000182362	C21orf57	chr21,+,47706650,47706783	chr21,+,47706656,47706783	non-coding	32	10	9	0	na	na	ENST00000329319	ENST00000397691
130603	SE	ENSG00000182362	C21orf57	chr21,+,47707036,47716075	chr21,+,47707036,47711247__chr21,+,47711375,47716075	coding	19	83	1	35.5	UPF0054	IPR002036	ENST00000329319	ENST00000339195
131158	A3SS	ENSG00000160298	C21orf58	chr21,-,47734793,47735387	chr21,-,47734962,47735387	non-coding	25	22	0	1	na	na	ENST00000397685	ENST00000445935
130776	SE	ENSG00000159079	C21orf59	chr21,-,33974282,33975470	chr21,-,33974282,33974581__chr21,-,33974676,33975470	coding	24	491	11	124.5	na	na	ENST00000290155	ENST00000440966
130777	A3SS	ENSG00000159079	C21orf59	chr21,-,33974282,33975470	chr21,-,33974676,33975470	splice_to_last	24	407	11	77	na	na	ENST00000425336	ENST00000440966
130789	ALE	ENSG00000159086	C21orf66	chr21,-,34110629,34115558	chr21,-,34113932,34115558	coding	327	28	53	2	unknown	unknown	ENST00000290178	ENST00000331923
130792	A5SS	ENSG00000159086	C21orf66	chr21,-,34123528,34127523	chr21,-,34123528,34127540	splice_to_last	150	72	185	43	na	na	ENST00000290178	ENST00000443785
131030	ALE	ENSG00000184809	C21orf88	chr21,-,40969915,40981509	chr21,-,40978273,40981509	coding	9	26	1	2	unknown	unknown	ENST00000329618	ENST00000380612
132858	SE	ENSG00000138867	C22orf13	chr22,-,24944968,24951582	chr22,-,24944968,24950916__chr22,-,24951103,24951582	coding	51	28	3	0	na	na	ENST00000404664	ENST00000407973
131265	A5SS	ENSG00000183597	C22orf25	chr22,+,20024376,20030877	chr22,+,20024616,20030877	coding	14	23	33	6	DUF833	IPR008551	ENST00000327374	ENST00000399807
131274	SE	ENSG00000183597	C22orf25	chr22,+,20040106,20043465	chr22,+,20040106,20040882__chr22,+,20041073,20043465	splice_to_last	9	8	1	0.5	DUF833	IPR008551	ENST00000411907	ENST00000450019
131275	SE	ENSG00000183597	C22orf25	chr22,+,20040106,20043465	chr22,+,20040106,20040959__chr22,+,20041073,20043465	coding	9	10.5	1	0.5	DUF833	IPR008551	ENST00000399807	ENST00000456048
132268	A5SS	ENSG00000183172	C22orf32	chr22,+,42475908,42477928	chr22,+,42475957,42477928	splice_to_last	18	172	11	21	na	na	ENST00000331479	ENST00000422252
132859	SE	ENSG00000178026	C22orf36	chr22,-,24984296,24985788	chr22,-,24984296,24984646__chr22,-,24985232,24985788	coding	24	18.5	2	0	na	na	ENST00000404045	ENST00000446942
123096	MXE	ENSG00000213699	C2orf18	chr2,+,26987293,26997118__chr2,+,26997190,26998331	chr2,+,26987293,26997911__chr2,+,26998082,26998331	splice_to_last	20	73	0	0	DUF914_euk	IPR009262	ENST00000414029	ENST00000429494
123144	A5SS	ENSG00000138085	C2orf28	chr2,+,27435334,27436044	chr2,+,27435474,27436044	non-coding	333	88	0	3	na	na	ENST00000380171	ENST00000405489
123679	SE	ENSG00000068912	C2orf30	chr2,+,54028978,54036350	chr2,+,54028978,54035435__chr2,+,54035596,54036350	coding	21	49	0	5	PRKCSH	IPR012913	ENST00000378239	ENST00000405123
123590	ALE	ENSG00000143919	C2orf34	chr2,+,44617443,44619023	chr2,+,44617443,44776693	coding	11	9	0	0	unknown	unknown	ENST00000428929	ENST00000428993
123592	ALE	ENSG00000143919	C2orf34	chr2,+,44617443,44619023	chr2,+,44617443,44931421	coding	11	92	0	0	unknown	unknown	ENST00000378494	ENST00000428929
123597	ALE	ENSG00000143919	C2orf34	chr2,+,44617443,44776693	chr2,+,44617443,44931421	coding	9	92	0	0	unknown	unknown	ENST00000378494	ENST00000402247
125900	MXE	ENSG00000118961	C2orf43	chr2,-,20974738,20990014__chr2,-,20990157,21022796	chr2,-,20974738,21001069__chr2,-,21001224,21022796	coding	19.5	15.5	1.5	0.5	na	na	ENST00000403006	ENST00000412261
123439	MXE	ENSG00000003509	C2orf56	chr2,+,37458902,37459248__chr2,+,37459408,37464899	chr2,+,37458902,37463238__chr2,+,37463318,37464899	coding	9	49.5	3.5	12	na	na	ENST00000336237	ENST00000431821
123449	A5SS	ENSG00000003509	C2orf56	chr2,+,37468779,37469777	chr2,+,37468933,37469777	non-coding	24	142	0	14	DUF185	IPR003788	ENST00000431821	ENST00000455230
123450	SE	ENSG00000003509	C2orf56	chr2,+,37468779,37471005	chr2,+,37468779,37469777__chr2,+,37469835,37471005	coding	13	144	0	6	DUF185	IPR003788	ENST00000336237	ENST00000455230
125611	A5SS	ENSG00000162971	C2orf60	chr2,-,200808556,200813040	chr2,-,200808556,200813059	coding	20	91	8	24	na	na	ENST00000354611	ENST00000441832
127241	SE	ENSG00000143933	C2orf61	chr2,-,47397902,47403579	chr2,-,47397902,47399552__chr2,-,47399597,47403579	coding	297	20	53	2.5	na	na	ENST00000409563	ENST00000456319
127505	SE	ENSG00000143951	C2orf86	chr2,-,63401966,63540382	chr2,-,63401966,63486441__chr2,-,63486543,63540382	coding	10	45	0	1.5	na	na	ENST00000409120	ENST00000409354
127515	SE	ENSG00000143951	C2orf86	chr2,-,63720073,63815330	chr2,-,63720073,63798508__chr2,-,63798759,63815330	coding	30	12.5	3	0.5	na	na	ENST00000417238	ENST00000431065
136358	SE	ENSG00000163608	C3orf17	chr3,-,112732878,112738388	chr3,-,112732878,112736294__chr3,-,112736448,112738388	coding	63	18	0	1.5	na	na	ENST00000393857	ENST00000431626
135455	AFE	ENSG00000179152	C3orf23	chr3,+,44379810,44396230	chr3,+,44380325,44396230	coding	9	9	15	1	unknown	unknown	ENST00000342649	ENST00000417237
135456	ALE	ENSG00000179152	C3orf23	chr3,+,44399367,44399708	chr3,+,44399367,44402856	coding	18	15	2	2	unknown	unknown	ENST00000383746	ENST00000412611
135459	A3SS	ENSG00000179152	C3orf23	chr3,+,44403009,44408947	chr3,+,44403009,44409023	splice_to_last	16	47	4	1	na	na	ENST00000342649	ENST00000412611
136403	SE	ENSG00000144559	C3orf31	chr3,-,11832054,11850990	chr3,-,11832054,11849306__chr3,-,11849368,11850990	coding	9	90.5	4	7	na	na	ENST00000273037	ENST00000455809
136409	SE	ENSG00000144559	C3orf31	chr3,-,11871337,11880695	chr3,-,11871337,11874476__chr3,-,11874624,11880695	coding	89	11	6	2.5	na	na	ENST00000273037	ENST00000457498
134152	AFE	ENSG00000183624	C3orf37	chr3,+,128997747,128998552	chr3,+,128998053,128998552	coding	8	14	1	4	unknown	unknown	ENST00000383463	ENST00000389735
138245	A3SS	ENSG00000163946	C3orf63	chr3,-,56657593,56658506	chr3,-,56657870,56658506	splice_to_last	23	244	4	32	na	na	ENST00000355628	ENST00000432540
138247	SE	ENSG00000163946	C3orf63	chr3,-,56667870,56674013	chr3,-,56667870,56672733__chr3,-,56672792,56674013	coding	18	101	2	7.5	na	na	ENST00000296313	ENST00000355628
137776	AFE	ENSG00000163832	C3orf75	chr3,-,47552715,47554810	chr3,-,47552715,47555026	coding	12	95	0	0	unknown	unknown	ENST00000439305	ENST00000450051
138849	A3SS	ENSG00000155275	C4orf23	chr4,+,8448316,8451395	chr4,+,8448316,8451424	non-coding	23	13	7	1	na	na	ENST00000316290	ENST00000429676
139981	A3SS	ENSG00000082213	C5orf22	chr5,+,31535999,31538366	chr5,+,31535999,31538590	non-coding	98	9	0	2	na	na	ENST00000355907	ENST00000397578
140033	SE	ENSG00000155542	C5orf35	chr5,+,56205569,56208837	chr5,+,56205569,56206995__chr5,+,56207362,56208837	splice_to_last	11	10.5	0	24.5	na	na	ENST00000285947	ENST00000418299
139977	SE	ENSG00000186493	C5orf38	chr5,+,2752577,2755142	chr5,+,2752577,2752735__chr5,+,2752867,2755142	splice_to_last	27	18	0	3	na	na	ENST00000397835	ENST00000457752
139978	SE	ENSG00000186493	C5orf38	chr5,+,2752577,2755142	chr5,+,2752577,2752735__chr5,+,2753468,2755142	splice_to_last	27	18.5	0	4	na	na	ENST00000334000	ENST00000457752
140051	A3SS	ENSG00000113597	C5orf44	chr5,+,64957976,64960060	chr5,+,64957976,64960063	coding	34	28	1	4	na	na	ENST00000399438	ENST00000438419
140703	SE	ENSG00000161010	C5orf45	chr5,-,179271226,179280377	chr5,-,179271226,179274977__chr5,-,179275065,179280377	coding	13	90.5	1	11	na	na	ENST00000292586	ENST00000376929
140704	SE	ENSG00000161010	C5orf45	chr5,-,179271226,179280377	chr5,-,179271226,179274977__chr5,-,179280275,179280377	coding	13	75	1	7.5	na	na	ENST00000376929	ENST00000403396
140705	SE	ENSG00000161010	C5orf45	chr5,-,179275065,179280377	chr5,-,179275065,179280196__chr5,-,179280275,179280377	coding	62	20.5	8	1.5	na	na	ENST00000292586	ENST00000403396
143353	SE	ENSG00000196821	C6orf106	chr6,-,34574680,34622401	chr6,-,34574680,34614377__chr6,-,34614574,34622401	coding	10	8.5	8	57	na	na	ENST00000374021	ENST00000374026
141086	A5SS	ENSG00000203760	C6orf173	chr6,+,126661544,126667350	chr6,+,126661589,126667350	coding	985	24	68	4	na	na	ENST00000368325	ENST00000368328
140920	A5SS	ENSG00000130349	C6orf203	chr6,+,107349474,107360952	chr6,+,107350000,107360952	non-coding	25	9	0	0	na	na	ENST00000311381	ENST00000405204
140922	AFE	ENSG00000130349	C6orf203	chr6,+,107349474,107360952	chr6,+,107351310,107360952	coding	25	17	0	2	unknown	unknown	ENST00000311381	ENST00000443043
140923	SE	ENSG00000130349	C6orf203	chr6,+,107350000,107360952	chr6,+,107350000,107351228__chr6,+,107351310,107360952	non-coding	9	12	0	1	na	na	ENST00000405204	ENST00000443043
158068	other	ENSG00000112167	C6orf64	chr6,-,39073551,39077089	chr6,-,39073551,39082658	na	10	18	0	0	unknown	unknown	ENST00000229903	ENST00000373249
145839	SE	ENSG00000164828	C7orf20	chr7,+,883156,891020	chr7,+,883156,888054__chr7,+,889239,891020	coding	10	12	0	0.5	na	na	ENST00000401592	ENST00000429178
145840	SE	ENSG00000164828	C7orf20	chr7,+,883156,891020	chr7,+,883156,888054__chr7,+,889669,891020	coding	10	42.5	0	1	na	na	ENST00000401592	ENST00000456758
145841	SE	ENSG00000164828	C7orf20	chr7,+,883156,891020	chr7,+,883156,889156__chr7,+,889669,891020	splice_to_last	10	32.5	0	0.5	na	na	ENST00000401592	ENST00000419312
145842	SE	ENSG00000164828	C7orf20	chr7,+,883156,891020	chr7,+,883156,889559__chr7,+,889669,891020	coding	10	34.5	0	0.5	na	na	ENST00000297445	ENST00000401592
145843	SE	ENSG00000164828	C7orf20	chr7,+,883156,891586	chr7,+,883156,888054__chr7,+,891118,891586	coding	38	19	0	0.5	na	na	ENST00000389574	ENST00000429178
145844	SE	ENSG00000164828	C7orf20	chr7,+,883156,891586	chr7,+,883156,889559__chr7,+,891118,891586	coding	38	11	0	0	na	na	ENST00000297445	ENST00000413171
145845	SE	ENSG00000164828	C7orf20	chr7,+,883156,891586	chr7,+,883156,891020__chr7,+,891118,891586	coding	38	13.5	0	0	na	na	ENST00000401592	ENST00000413171
145849	A3SS	ENSG00000164828	C7orf20	chr7,+,892303,892446	chr7,+,892303,892449	coding	122	48	0	0	na	na	ENST00000389574	ENST00000452783
145317	AFE	ENSG00000106609	C7orf42	chr7,+,66386447,66406834	chr7,+,66395854,66406834	coding	23	8	0	2	unknown	unknown	ENST00000418375	ENST00000433271
147414	ALE	ENSG00000106603	C7orf44	chr7,-,43649239,43679047	chr7,-,43673006,43679047	coding	27	26	0	1	unknown	unknown	ENST00000438444	ENST00000446564
147425	SE	ENSG00000106603	C7orf44	chr7,-,43688250,43769027	chr7,-,43688250,43690210__chr7,-,43705320,43769027	coding	19	8	203	5	na	na	ENST00000431651	ENST00000457939
144642	SE	ENSG00000188732	C7orf46	chr7,+,23719901,23728887	chr7,+,23719901,23724117__chr7,+,23724290,23728887	coding	11	22.5	1	3.5	na	na	ENST00000409192	ENST00000409653
144643	SE	ENSG00000188732	C7orf46	chr7,+,23719901,23728887	chr7,+,23719901,23724117__chr7,+,23728531,23728887	coding	11	15	1	1.5	na	na	ENST00000409994	ENST00000446234
144644	SE	ENSG00000188732	C7orf46	chr7,+,23719901,23728887	chr7,+,23719901,23724117__chr7,+,23728605,23728887	coding	11	15	1	1.5	na	na	ENST00000409994	ENST00000429719
144652	SE	ENSG00000188732	C7orf46	chr7,+,23731214,23740404	chr7,+,23731214,23737810__chr7,+,23737917,23740404	coding	40	47	9	34.5	na	na	ENST00000409192	ENST00000409653
146686	A5SS	ENSG00000122783	C7orf49	chr7,-,134852558,134853500	chr7,-,134852558,134853537	non-coding	42	47	10	1	na	na	ENST00000413261	ENST00000422189
146688	A5SS	ENSG00000122783	C7orf49	chr7,-,134852558,134853500	chr7,-,134852558,134853720	non-coding	42	10	10	1	na	na	ENST00000422189	ENST00000435834
146689	A5SS	ENSG00000122783	C7orf49	chr7,-,134852558,134853537	chr7,-,134852558,134853720	non-coding	47	10	1	1	na	na	ENST00000393114	ENST00000435834
146691	A5SS	ENSG00000122783	C7orf49	chr7,-,134853811,134855150	chr7,-,134853811,134855403	non-coding	13	51	0	6	na	na	ENST00000422189	ENST00000424142
146511	A5SS	ENSG00000146540	C7orf50	chr7,-,1167021,1177824	chr7,-,1167021,1177834	non-coding	42	42	3	0	na	na	ENST00000357429	ENST00000425726
145874	SE	ENSG00000105792	C7orf63	chr7,+,89929372,89934057	chr7,+,89929372,89933282__chr7,+,89933419,89934057	coding	18	15.5	6	5	na	na	ENST00000316089	ENST00000389297
145879	SE	ENSG00000105792	C7orf63	chr7,+,89937167,89939381	chr7,+,89937167,89938576__chr7,+,89938680,89939381	splice_to_last	8	10.5	1	2.5	na	na	ENST00000412839	ENST00000445156
158579	other	ENSG00000156170	C8orf38	chr8,+,96044321,96047681	chr8,+,96046349,96047681	na	71	9	12	0	unknown	unknown	ENST00000286687	ENST00000396116
148908	A5SS	ENSG00000176209	C8orf40	chr8,+,42396847,42401611	chr8,+,42397515,42401611	non-coding	37	28	0	2	na	na	ENST00000414154	ENST00000417410
148907	AFE	ENSG00000176209	C8orf40	chr8,+,42396847,42401611	chr8,+,42397297,42401611	coding	37	57	0	9	unknown	unknown	ENST00000414154	ENST00000416469
148910	A5SS	ENSG00000176209	C8orf40	chr8,+,42397297,42401611	chr8,+,42397515,42401611	non-coding	57	28	9	2	na	na	ENST00000416469	ENST00000417410
148783	SE	ENSG00000120913	C8orf58	chr8,+,22447253,22451245	chr8,+,22447253,22449063__chr8,+,22449180,22451245	splice_to_last	8	142.5	0	1	Znf_LIM	IPR001781	ENST00000339162	ENST00000443561
148797	A3SS	ENSG00000120913	C8orf58	chr8,+,22459824,22460049	chr8,+,22459824,22460073	coding	35	24	0	1	na	na	ENST00000289989	ENST00000409586
148798	SE	ENSG00000120913	C8orf58	chr8,+,22459824,22460707	chr8,+,22459824,22460049__chr8,+,22460155,22460707	splice_to_last	53	29.5	0	0	na	na	ENST00000381191	ENST00000438857
148799	SE	ENSG00000120913	C8orf58	chr8,+,22459824,22460707	chr8,+,22459824,22460073__chr8,+,22460155,22460707	splice_to_last	53	24	0	0.5	na	na	ENST00000409586	ENST00000438857
150846	SE	ENSG00000173611	C9orf126	chr9,-,127818285,127904911	chr9,-,127818285,127828268__chr9,-,127828336,127904911	coding	33	19.5	1	0.5	na	na	ENST00000336505	ENST00000373549
151599	SE	ENSG00000187764	C9orf164	chr9,-,92020613,92070802	chr9,-,92020613,92032970__chr9,-,92033032,92070802	coding	14	9	0	0.5	na	na	ENST00000422704	ENST00000429836
151600	SE	ENSG00000187764	C9orf164	chr9,-,92020613,92070802	chr9,-,92020613,92032970__chr9,-,92033351,92070802	coding	14	9	0	0.5	na	na	ENST00000356444	ENST00000422704
151606	AFE	ENSG00000187764	C9orf164	chr9,-,92070867,92094486	chr9,-,92070867,92112833	coding	8	53	0	0	unknown	unknown	ENST00000422704	ENST00000438547
151327	A5SS	ENSG00000164967	C9orf23	chr9,-,34611328,34611856	chr9,-,34611328,34612060	non-coding	54	22	14	0	na	na	ENST00000297613	ENST00000378959
151317	A3SS	ENSG00000164970	C9orf25	chr9,-,34401116,34401663	chr9,-,34401119,34401663	splice_to_last	21	76	2	0	na	na	ENST00000359556	ENST00000422409
150194	ALE	ENSG00000196642	C9orf86	chr9,+,139726821,139728171	chr9,+,139726821,139730193	coding	18	138	0	37	unknown	unknown	ENST00000357466	ENST00000425121
151517	SE	ENSG00000106733	C9orf95	chr9,-,77692495,77698002	chr9,-,77692495,77693241__chr9,-,77693497,77698002	coding	69	48.5	4	4	na	na	ENST00000361092	ENST00000396149
131546	AFE	ENSG00000099991	CABIN1	chr22,+,24407816,24431891	chr22,+,24408177,24431891	coding	16	28	0	0	unknown	unknown	ENST00000263119	ENST00000398319
109629	SE	ENSG00000182985	CADM1	chr11,-,115049494,115085327	chr11,-,115049494,115080293__chr11,-,115080376,115085327	coding	8	210	2	33	na	na	ENST00000404468	ENST00000452722
144289	AFE	ENSG00000122786	CALD1	chr7,+,134552554,134613504	chr7,+,134576423,134613504	coding	110	115	13	2	unknown	unknown	ENST00000361901	ENST00000443197
144291	SE	ENSG00000122786	CALD1	chr7,+,134618140,134625842	chr7,+,134618140,134620438__chr7,+,134620515,134625842	coding	577	30	32	2	Caldesmon_LSP	IPR006018	ENST00000361901	ENST00000393118
144292	A3SS	ENSG00000122786	CALD1	chr7,+,134642862,134642959	chr7,+,134642862,134642962	coding	413	34	4	41	Caldesmon_LSP	IPR006018	ENST00000361388	ENST00000422748
114557	SE	ENSG00000129007	CALML4	chr15,-,68489965,68497458	chr15,-,68489965,68491878__chr15,-,68492018,68497458	coding	33	16	0	0.5	na	na	ENST00000354678	ENST00000395465
158148	other	ENSG00000128595	CALU	chr7,+,128388857,128394315	chr7,+,128388857,128394582	na	395	87	9	1	unknown	unknown	ENST00000249364	ENST00000449187
144202	MXE	ENSG00000128595	CALU	chr7,+,128388857,128394315__chr7,+,128394508,128398924	chr7,+,128388857,128394582__chr7,+,128394775,128398924	coding	344	92	12	6.5	EF_hand_Ca_bd	IPR002048	ENST00000249364	ENST00000449187
139009	SE	ENSG00000145349	CAMK2D	chr4,-,114375670,114378490	chr4,-,114375670,114376881__chr4,-,114376976,114378490	coding	125	12	12	2	na	na	ENST00000394524	ENST00000394526
108280	SE	ENSG00000148660	CAMK2G	chr10,-,75577311,75581439	chr10,-,75577311,75579289__chr10,-,75579375,75581439	coding	53	11.5	1	0.5	na	na	ENST00000305762	ENST00000394763
108281	SE	ENSG00000148660	CAMK2G	chr10,-,75577311,75581439	chr10,-,75577311,75579289__chr10,-,75579402,75581439	coding	53	12.5	1	0.5	na	na	ENST00000305762	ENST00000394762
108285	SE	ENSG00000148660	CAMK2G	chr10,-,75583841,75597225	chr10,-,75583841,75585036__chr10,-,75585104,75597225	coding	20	60	0	9	na	na	ENST00000322680	ENST00000394762
108286	SE	ENSG00000148660	CAMK2G	chr10,-,75583841,75597225	chr10,-,75583841,75585036__chr10,-,75587878,75597225	coding	20	12.5	0	0.5	na	na	ENST00000305762	ENST00000394762
151100	SE	ENSG00000130559	CAMSAP1	chr9,-,138742306,138758301	chr9,-,138742306,138754312__chr9,-,138754453,138758301	coding	18	38.5	3	6.5	na	na	ENST00000312405	ENST00000389533
151101	SE	ENSG00000130559	CAMSAP1	chr9,-,138742306,138758301	chr9,-,138742306,138754312__chr9,-,138757209,138758301	coding	18	31.5	3	5	na	na	ENST00000312405	ENST00000409386
139955	A5SS	ENSG00000127022	CANX	chr5,+,179126049,179132679	chr5,+,179126102,179132679	non-coding	15	236	0	8	na	na	ENST00000247461	ENST00000452673
102458	SE	ENSG00000131236	CAP1	chr1,+,40506454,40525005	chr1,+,40506454,40507100__chr1,+,40507164,40525005	non-coding	13	9	1	0	na	na	ENST00000420216	ENST00000421589
102459	A3SS	ENSG00000131236	CAP1	chr1,+,40506454,40525005	chr1,+,40506454,40525008	non-coding	13	28	1	1	na	na	ENST00000372797	ENST00000372802
102460	A5SS	ENSG00000131236	CAP1	chr1,+,40506454,40525005	chr1,+,40506472,40525005	non-coding	13	44	1	0	na	na	ENST00000372798	ENST00000372802
102464	SE	ENSG00000131236	CAP1	chr1,+,40506454,40525008	chr1,+,40506454,40507100__chr1,+,40507164,40525008	non-coding	28	9.5	1	3	na	na	ENST00000427843	ENST00000435719
102465	A5SS	ENSG00000131236	CAP1	chr1,+,40506454,40525008	chr1,+,40506472,40525008	non-coding	28	33	1	0	na	na	ENST00000340450	ENST00000372797
102470	SE	ENSG00000131236	CAP1	chr1,+,40506472,40525005	chr1,+,40506472,40507100__chr1,+,40507164,40525005	non-coding	44	19	0	0	na	na	ENST00000372798	ENST00000414281
102471	A3SS	ENSG00000131236	CAP1	chr1,+,40506472,40525005	chr1,+,40506472,40525008	non-coding	44	33	0	0	na	na	ENST00000340450	ENST00000372792
102474	SE	ENSG00000131236	CAP1	chr1,+,40506472,40525008	chr1,+,40506472,40507100__chr1,+,40507164,40525008	non-coding	33	19.5	0	3	na	na	ENST00000401065	ENST00000424977
102478	A3SS	ENSG00000131236	CAP1	chr1,+,40507164,40525005	chr1,+,40507164,40525008	non-coding	17	18	0	6	na	na	ENST00000414281	ENST00000424977
102479	A3SS	ENSG00000131236	CAP1	chr1,+,40525129,40525738	chr1,+,40525129,40525741	coding	381	27	3	67	Adenylate_cyclase-assoc_CAP_N	IPR013992	ENST00000340450	ENST00000372798
128010	AFE	ENSG00000042493	CAPG	chr2,-,85629280,85637439	chr2,-,85629280,85641106	coding	53	232	0	0	unknown	unknown	ENST00000263867	ENST00000409724
155049	other	ENSG00000014216	CAPN1	chr11,+,64950438,64950598	chr11,+,64950438,64950945	na	924	10	96	0	unknown	unknown	ENST00000259755	ENST00000279247
122821	SE	ENSG00000142330	CAPN10	chr2,+,241534720,241535735	chr2,+,241534720,241535350__chr2,+,241535568,241535735	coding	29	22.5	0	0	Peptidase_C2	IPR001300	ENST00000357048	ENST00000416591
134327	SE	ENSG00000131375	CAPN7	chr3,+,15282359,15283684	chr3,+,15282359,15282959__chr3,+,15283094,15283684	coding	8	41	1	1	na	na	ENST00000253693	ENST00000443567
118489	A3SS	ENSG00000126247	CAPNS1	chr19,+,36631058,36631898	chr19,+,36631058,36631901	non-coding	135	53	0	1	na	na	ENST00000246533	ENST00000457326
111576	A3SS	ENSG00000110888	CAPRIN2	chr12,-,30863403,30864499	chr12,-,30863447,30864499	splice_to_last	42	52	8	0	na	na	ENST00000308433	ENST00000395805
111578	MXE	ENSG00000110888	CAPRIN2	chr12,-,30869609,30872012__chr12,-,30872158,30876192	chr12,-,30869609,30873744__chr12,-,30873848,30876192	coding	195	67.5	18	1	na	na	ENST00000298892	ENST00000395805
111580	SE	ENSG00000110888	CAPRIN2	chr12,-,30872158,30876192	chr12,-,30872158,30873744__chr12,-,30873848,30876192	coding	53	84.5	0	3	na	na	ENST00000395805	ENST00000417045
111581	SE	ENSG00000110888	CAPRIN2	chr12,-,30884443,30887901	chr12,-,30884443,30886562__chr12,-,30886644,30887901	coding	81	51	3	4.5	na	na	ENST00000308433	ENST00000438006
104601	AFE	ENSG00000077549	CAPZB	chr1,-,19746243,19810683	chr1,-,19746243,19811929	coding	18	858	5	1	unknown	unknown	ENST00000264202	ENST00000433834
119631	SE	ENSG00000105483	CARD8	chr19,-,48718640,48724986	chr19,-,48718640,48722127__chr19,-,48722268,48724986	coding	42	42.5	6	4.5	na	na	ENST00000357778	ENST00000359009
119636	SE	ENSG00000105483	CARD8	chr19,-,48737799,48744218	chr19,-,48737799,48741639__chr19,-,48741788,48744218	coding	13	40	2	4	na	na	ENST00000359009	ENST00000447740
115957	AFE	ENSG00000153048	CARHSP1	chr16,-,8953191,8961905	chr16,-,8953191,8962822	coding	16	925	3	1	unknown	unknown	ENST00000311052	ENST00000396593
112018	A3SS	ENSG00000213995	CARKD	chr13,+,111289595,111290588	chr13,+,111289595,111290724	splice_to_last	8	37	0	2	UPF_carb_kinase-rel	IPR000631	ENST00000309957	ENST00000439607
118199	SE	ENSG00000142453	CARM1	chr19,+,11031802,11032290	chr19,+,11031802,11032050__chr19,+,11032118,11032290	splice_to_last	45	478.5	0	0	na	na	ENST00000327064	ENST00000344150
109885	A5SS	ENSG00000110619	CARS	chr11,-,3022477,3023191	chr11,-,3022477,3023199	splice_to_last	56	206	30	20	na	na	ENST00000397114	ENST00000401769
109889	SE	ENSG00000110619	CARS	chr11,-,3063485,3078572	chr11,-,3063485,3068982__chr11,-,3069230,3078572	coding	69	16.5	0	0.5	na	na	ENST00000397111	ENST00000397114
113952	SE	ENSG00000166734	CASC4	chr15,+,44673173,44705533	chr15,+,44673173,44695084__chr15,+,44695251,44705533	splice_to_last	33	75	5	13	na	na	ENST00000299957	ENST00000345795
153669	MXE	ENSG00000147044	CASK	chrX,-,41413167,41414852__chrX,-,41414887,41419031	chrX,-,41413167,41416284__chrX,-,41416352,41419031	coding	51	51.5	1	5.5	na	na	ENST00000378158	ENST00000442742
153670	SE	ENSG00000147044	CASK	chrX,-,41413167,41416284	chrX,-,41413167,41414852__chrX,-,41414887,41416284	coding	15	62	2	5.5	na	na	ENST00000378158	ENST00000378166
153671	SE	ENSG00000147044	CASK	chrX,-,41414887,41419031	chrX,-,41414887,41416284__chrX,-,41416352,41419031	coding	38	74	0	9	na	na	ENST00000378166	ENST00000442742
140230	AFE	ENSG00000153113	CAST	chr5,+,96031610,96058342	chr5,+,96038618,96058342	coding	251	11	27	4	unknown	unknown	ENST00000341926	ENST00000361634
140231	SE	ENSG00000153113	CAST	chr5,+,96058401,96063192	chr5,+,96058401,96062497__chr5,+,96062562,96063192	coding	154	44	5	3	na	na	ENST00000359176	ENST00000395812
[truncated: 3,963 more rows]

## Sheet: TableS3
Supplementary Table S3. Genes containing two or more alternative 3' exons based on distinct 3'UTR expression
[truncated: 261 more rows]

[truncated: 13 more sheets: TableS4, TableS5, TableS6, TableS7, TableS8, TableS9, TableS10A, TableS10B, TableS11, TableS12, TableS13, TableS14, TableS15]
